# Supplementary material for: Genetic diversity and differentiation among insular honey bee populations in the southwest Indian Ocean likely reflect old geographical isolation and modern introductions
Source: PLoS One. 2017 Dec 27;12(12):e0189234. doi: 10.1371/journal.pone.0189234 (PMC5744932; doi:10.1371/journal.pone.0189234)
Supplement: S1 Table — (XLSX) [file pone.0189234.s012.xlsx]

## Sheet: Table S1
S1 Tab. Complete samples database, including sample ID, location coordinate, mtDNA COI-COII DraI profile and multi locus genotype determined at 14 loci microsatellites in all same laboratory conditions.
	NA = Not Available, x = not sequenced
Sampling details									mtDNA				Nuclear microsatellites genotypes data
Order	Sample-ID	Country/Island	Archipelago	Site	X	Y	Date	Sampler	Size COI-COII	DraI profile	COI-COII haplotype	Lineage	A113		A24		Ap55		A88		Ap28		A29		Ap289		Ap273		B124		A8		A35		Ap33		Ap66		Ap43
1	Dg16	Madagascar	-	MDG01	-12.3	49.37	2011	H. Rasolofoarivao	P0Q	A1	x	A	210	210	102	102	181	181	136	149	133	137	128	130	184	238	106	106	220	230	169	169	94	107	233	233	102	102	129	183
2	Dg17	Madagascar	-	MDG01	-12.3	49.37	2011	H. Rasolofoarivao	P0Q	A1	x	A	210	210	96	102	181	181	149	149	133	137	128	128	184	184	106	106	230	230	169	169	94	107	233	233	98	98	129	183
3	Dg18	Madagascar	-	MDG01	-12.3	49.37	2011	H. Rasolofoarivao	P0Q	A1	x	A	210	210	102	102	181	181	136	136	133	133	128	130	184	184	106	106	220	230	169	169	94	94	233	239	98	102	177	183
4	Dg25	Madagascar	-	MDG02	-12.32	49.31	2011	H. Rasolofoarivao	P0Q	A1	A1_MAD3	A	210	214	102	102	181	181	136	149	137	137	128	128	184	228	106	110	228	228	169	169	94	94	239	241	96	102	183	183
5	Dg23	Madagascar	-	MDG02	-12.32	49.31	2011	H. Rasolofoarivao	P0Q	A1	x	A	214	214	96	96	181	181	136	149	133	137	128	128	184	184	106	110	NA	NA	169	169	94	107	239	249	98	102	127	129
6	Dg24	Madagascar	-	MDG02	-12.32	49.31	2011	H. Rasolofoarivao	P0Q	A1	x	A	210	214	96	102	181	181	147	149	132	137	128	128	NA	NA	106	106	NA	NA	NA	NA	94	107	233	235	96	102	129	183
7	Dg26	Madagascar	-	MDG02	-12.32	49.31	2011	H. Rasolofoarivao	P0Q	A1	x	A	210	212	102	102	181	181	147	149	133	133	128	128	184	184	106	106	220	230	169	169	107	107	233	239	98	102	127	129
8	Dg27	Madagascar	-	MDG02	-12.32	49.31	2011	H. Rasolofoarivao	P0Q	A1	x	A	212	212	102	102	181	181	136	147	133	137	128	128	184	184	106	106	220	220	169	169	94	107	233	247	96	102	127	129
9	Dg28	Madagascar	-	MDG02	-12.32	49.31	2011	H. Rasolofoarivao	P0Q	A1	x	A	NA	NA	96	102	NA	NA	147	149	133	137	128	128	230	234	106	106	220	230	169	169	94	94	233	245	98	102	129	129
10	Dg29	Madagascar	-	MDG02	-12.32	49.31	2011	H. Rasolofoarivao	P0Q	A1	x	A	210	212	102	102	181	181	136	147	133	133	128	128	184	184	106	106	230	230	169	169	94	94	233	239	96	102	183	185
11	Dg30	Madagascar	-	MDG02	-12.32	49.31	2011	H. Rasolofoarivao	P0Q	A1	x	A	210	210	102	102	181	181	136	149	133	137	128	128	184	228	106	106	220	230	169	169	94	107	233	245	96	96	127	183
12	Dg31	Madagascar	-	MDG02	-12.32	49.31	2011	H. Rasolofoarivao	P0Q	A1	x	A	212	212	102	102	181	181	136	147	133	133	128	128	184	184	106	106	220	220	169	169	94	107	235	239	98	102	129	129
13	Dg32	Madagascar	-	MDG02	-12.32	49.31	2011	H. Rasolofoarivao	P0Q	A1	x	A	210	214	102	102	181	181	147	149	133	137	128	128	184	232	106	106	220	230	169	169	94	107	233	239	102	102	127	127
14	Dg01	Madagascar	-	MDG03	-12.5	49.2	2011	H. Rasolofoarivao	P0Q	A1	A1_MAD3	A	208	210	102	102	181	181	149	149	133	133	NA	NA	NA	NA	106	106	220	232	NA	NA	94	94	NA	NA	96	102	NA	NA
15	Dg03	Madagascar	-	MDG03	-12.5	49.2	2011	H. Rasolofoarivao	P0Q	A1	A1_MAD3	A	210	214	96	102	181	181	149	149	132	133	128	128	184	232	106	106	230	230	169	169	107	107	233	239	102	102	181	183
16	Dg04	Madagascar	-	MDG03	-12.5	49.2	2011	H. Rasolofoarivao	P0Q	A1	A1_MAD3	A	212	214	102	102	181	181	136	147	133	137	128	128	184	184	106	106	220	220	169	169	94	107	233	247	102	102	129	129
17	Dg02	Madagascar	-	MDG03	-12.5	49.2	2011	H. Rasolofoarivao	P0Q	A1	x	A	210	212	102	102	181	181	136	149	133	133	128	128	184	234	106	106	220	228	169	169	94	94	233	239	102	102	129	129
18	Dg05	Madagascar	-	MDG04	-12.49	49.21	2011	H. Rasolofoarivao	P0Q	A1	A1_MAD3	A	210	214	102	102	NA	NA	136	147	132	137	128	130	184	230	106	110	230	230	169	169	107	107	239	247	102	102	179	183
19	Dg06	Madagascar	-	MDG04	-12.49	49.21	2011	H. Rasolofoarivao	P0Q	A1	A1_MAD3	A	210	214	96	102	181	181	147	149	132	133	128	128	184	228	106	106	228	230	169	169	94	107	229	233	98	102	127	127
20	Dg07	Madagascar	-	MDG04	-12.49	49.21	2011	H. Rasolofoarivao	P0Q	A1	A1_MAD15	A	210	210	96	102	181	181	149	149	132	137	128	128	184	232	106	106	220	230	169	169	94	107	229	233	98	102	129	129
21	Dg08	Madagascar	-	MDG04	-12.49	49.21	2011	H. Rasolofoarivao	P0Q	A1	A1_MAD3	A	210	210	102	102	181	181	147	149	137	137	128	128	230	236	106	106	220	220	169	169	94	107	233	239	98	102	127	129
22	Dg09	Madagascar	-	MDG04	-12.49	49.21	2011	H. Rasolofoarivao	P0Q	A1	x	A	210	210	96	102	181	181	136	147	133	133	128	128	184	184	106	106	220	228	NA	NA	94	94	233	239	102	102	127	129
23	Dg10	Madagascar	-	MDG04	-12.49	49.21	2011	H. Rasolofoarivao	P0Q	A1	x	A	210	214	102	102	175	181	136	147	133	137	128	128	184	232	106	106	220	230	169	169	94	107	233	239	98	102	127	181
24	Dg13	Madagascar	-	MDG05	-12.5	49.21	2011	H. Rasolofoarivao	P0Q	A1	A1_MAD3	A	210	214	92	102	181	181	136	147	133	137	128	128	184	232	106	106	220	228	169	169	94	107	233	235	102	102	179	183
25	Dg11	Madagascar	-	MDG05	-12.5	49.21	2011	H. Rasolofoarivao	P0Q	A1	x	A	210	210	102	102	181	181	147	149	133	137	128	128	184	232	106	106	220	220	169	169	94	94	239	239	102	102	129	183
26	Dg12	Madagascar	-	MDG05	-12.5	49.21	2011	H. Rasolofoarivao	P0Q	A1	x	A	210	210	102	102	181	181	149	149	137	137	128	128	186	186	106	106	228	230	169	169	94	107	233	239	102	102	129	185
27	Dg14	Madagascar	-	MDG05	-12.5	49.21	2011	H. Rasolofoarivao	P0Q	A1	x	A	210	214	102	102	181	181	136	147	133	133	128	130	184	228	106	106	230	232	169	169	94	94	233	239	98	102	127	171
28	Dg19	Madagascar	-	MDG06	-12.67	49.29	2011	H. Rasolofoarivao	P0Q	A1	x	A	210	214	96	96	181	181	147	149	133	137	128	128	230	230	106	106	220	230	169	169	94	107	233	233	102	102	129	185
29	Dg20	Madagascar	-	MDG06	-12.67	49.29	2011	H. Rasolofoarivao	P0Q	A1	x	A	210	214	96	96	181	181	147	149	132	133	128	128	184	186	106	106	220	230	NA	NA	94	107	233	239	98	102	127	129
30	Dg22	Madagascar	-	MDG06	-12.67	49.29	2011	H. Rasolofoarivao	P0Q	A1	x	A	210	212	96	102	181	181	136	149	137	137	128	130	184	232	106	110	220	234	169	169	94	107	233	233	102	102	127	183
31	Ab50	Madagascar	-	MDG07	-13.21	49	2011	H. Rasolofoarivao	P0Q	A1	A1_MAD10	A	210	210	96	102	181	181	147	147	133	137	128	128	232	236	106	106	220	234	169	169	94	107	231	239	102	102	129	181
32	Ab51	Madagascar	-	MDG07	-13.21	49	2011	H. Rasolofoarivao	P0Q	A1	A1_MAD10	A	210	210	96	102	181	181	147	147	133	133	128	128	184	232	106	106	230	234	169	169	94	107	231	233	102	102	129	181
33	Ab52	Madagascar	-	MDG07	-13.21	49	2011	H. Rasolofoarivao	P0Q	A1	A1_MAD3	A	210	210	102	102	181	181	147	149	133	137	128	128	184	184	106	106	230	232	169	169	94	107	235	241	102	102	179	187
34	Ab53	Madagascar	-	MDG07	-13.21	49	2011	H. Rasolofoarivao	P0Q	A1	x	A	212	214	102	102	175	181	147	147	137	137	128	128	184	184	106	106	220	228	169	169	94	94	233	247	102	102	127	183
35	Ab54	Madagascar	-	MDG07	-13.21	49	2011	H. Rasolofoarivao	P0Q	A1	x	A	210	212	96	102	181	181	149	149	133	133	128	128	184	234	106	106	230	232	169	169	94	94	233	233	102	102	127	183
36	Ab55	Madagascar	-	MDG07	-13.21	49	2011	H. Rasolofoarivao	P0Q	A1	x	A	210	212	96	102	181	181	136	147	137	137	128	128	184	184	106	106	220	220	169	169	107	107	233	233	102	102	181	181
37	Ab56	Madagascar	-	MDG07	-13.21	49	2011	H. Rasolofoarivao	P0Q	A1	x	A	210	212	96	102	181	181	136	147	137	137	128	128	184	184	106	106	220	220	169	169	94	107	233	239	102	102	181	187
38	Ab57	Madagascar	-	MDG07	-13.21	49	2011	H. Rasolofoarivao	P0Q	A1	x	A	210	210	102	102	181	181	136	147	133	137	128	128	184	184	106	106	220	232	169	169	94	111	NA	NA	102	102	NA	NA
39	Ab58	Madagascar	-	MDG07	-13.21	49	2011	H. Rasolofoarivao	P0Q	A1	x	A	210	214	102	102	181	181	136	147	133	133	128	128	184	184	106	110	220	220	169	169	94	94	233	233	96	102	127	183
40	NB43	Madagascar	-	MDG08	-13.39	48.27	2011	H. Rasolofoarivao	P0Q	A1	A1_MAD3	A	210	214	96	96	175	181	136	147	137	137	128	128	184	184	106	106	220	228	169	169	94	94	233	233	102	102	129	183
41	NB44	Madagascar	-	MDG08	-13.39	48.27	2011	H. Rasolofoarivao	P0Q	A1	A1_MAD3	A	210	210	96	102	175	181	136	147	133	137	128	128	184	184	106	106	NA	NA	NA	NA	94	107	233	239	98	102	129	179
42	NB45	Madagascar	-	MDG08	-13.39	48.27	2011	H. Rasolofoarivao	P0Q	A1	A1_MAD3	A	214	214	96	102	181	181	147	149	133	133	128	128	184	228	106	106	220	230	169	169	94	94	233	239	98	102	129	179
43	NB46	Madagascar	-	MDG08	-13.39	48.27	2011	H. Rasolofoarivao	P0Q	A1	x	A	214	214	102	102	181	181	147	149	133	133	128	128	184	234	106	106	228	232	169	169	94	107	233	233	102	102	127	183
44	NB47	Madagascar	-	MDG08	-13.39	48.27	2011	H. Rasolofoarivao	P0Q	A1	x	A	210	212	102	102	181	181	147	147	137	137	128	128	184	232	106	106	220	228	169	169	94	107	233	239	102	102	127	187
45	NB48	Madagascar	-	MDG08	-13.39	48.27	2011	H. Rasolofoarivao	P0Q	A1	x	A	212	214	96	102	181	181	149	149	137	137	128	128	184	230	106	106	220	230	169	169	94	94	239	239	102	102	127	129
46	NB49	Madagascar	-	MDG08	-13.39	48.27	2011	H. Rasolofoarivao	P0Q	A1	x	A	212	214	102	102	181	181	149	149	137	137	128	130	230	232	106	106	230	232	169	169	94	94	233	239	102	102	127	127
47	Aj33	Madagascar	-	MDG09	-13.65	48.59	2011	H. Rasolofoarivao	P0Q	A1	A1_MAD3	A	212	212	102	102	181	181	147	147	137	137	128	128	NA	NA	106	106	NA	NA	NA	NA	92	94	NA	NA	94	102	179	183
48	Aj34	Madagascar	-	MDG09	-13.65	48.59	2011	H. Rasolofoarivao	P0Q	A1	A1_MAD6	A	210	210	102	102	179	181	136	147	133	137	128	128	NA	NA	106	110	220	232	169	169	107	107	233	239	96	102	129	183
49	Aj35	Madagascar	-	MDG09	-13.65	48.59	2011	H. Rasolofoarivao	P0Q	A1	A1_MAD3	A	210	214	102	102	181	181	149	149	132	133	128	128	184	230	106	106	220	230	169	169	94	107	233	239	102	102	129	129
50	Aj37	Madagascar	-	MDG10	-13.65	48.46	2011	H. Rasolofoarivao	P0Q	A1	x	A	210	214	96	102	181	181	147	149	137	137	128	128	184	234	106	106	220	232	169	169	94	94	233	239	98	102	177	181
51	Aj38	Madagascar	-	MDG10	-13.65	48.46	2011	H. Rasolofoarivao	P0Q	A1	x	A	210	214	102	102	181	181	147	147	133	137	128	128	184	228	106	106	230	232	169	169	94	94	233	239	98	102	179	185
52	Aj39	Madagascar	-	MDG10	-13.65	48.46	2011	H. Rasolofoarivao	P0Q	A1	x	A	210	212	96	102	181	181	147	149	137	137	128	128	184	184	106	106	228	230	169	169	94	94	239	239	102	102	127	183
53	Aj40	Madagascar	-	MDG10	-13.65	48.46	2011	H. Rasolofoarivao	P0Q	A1	x	A	210	212	96	102	179	181	147	147	133	137	128	128	184	240	106	106	220	230	169	169	94	94	233	239	96	98	127	181
54	Aj41	Madagascar	-	MDG10	-13.65	48.46	2011	H. Rasolofoarivao	P0Q	A1	x	A	210	214	96	102	181	181	136	147	133	137	128	128	184	184	106	106	220	220	169	169	107	107	233	235	102	102	127	187
55	Aj42	Madagascar	-	MDG10	-13.65	48.46	2011	H. Rasolofoarivao	P0Q	A1	x	A	210	214	96	102	181	181	136	149	133	137	128	128	184	184	106	106	230	230	169	169	94	94	233	237	102	102	179	183
56	Sb141	Madagascar	-	MDG11	-14.27	50.15	2011	H. Rasolofoarivao	P0Q	A1	A1_MAD9	A	210	212	102	102	181	181	136	149	133	137	128	128	184	184	106	106	220	230	169	169	94	107	233	233	102	102	129	129
57	Sb142	Madagascar	-	MDG11	-14.27	50.15	2011	H. Rasolofoarivao	P0Q	A1	A1_MAD8	A	212	214	102	102	181	181	147	149	132	133	128	128	184	184	106	106	220	220	169	169	94	107	NA	NA	102	102	NA	NA
58	Sb143	Madagascar	-	MDG11	-14.27	50.15	2011	H. Rasolofoarivao	P0Q	A1	A1_MAD15	A	212	214	NA	NA	181	181	136	147	130	132	128	128	230	232	106	106	232	232	169	169	107	107	NA	NA	98	102	127	127
59	Sb127	Madagascar	-	MDG11	-14.27	50.15	2011	H. Rasolofoarivao	P0Q	A1	x	A	212	212	96	102	181	181	147	147	137	137	128	128	230	230	106	106	220	230	169	169	94	107	233	233	102	102	129	129
60	Sb128	Madagascar	-	MDG11	-14.27	50.15	2011	H. Rasolofoarivao	P0Q	A1	x	A	212	214	96	102	181	181	149	149	137	137	128	128	184	236	106	106	220	230	169	169	94	107	233	233	102	102	129	183
61	Sb129	Madagascar	-	MDG11	-14.27	50.15	2011	H. Rasolofoarivao	P0Q	A1	x	A	210	212	102	102	181	181	136	149	137	137	128	128	184	184	106	106	220	220	NA	NA	94	94	NA	NA	94	94	NA	NA
62	Sb130	Madagascar	-	MDG11	-14.27	50.15	2011	H. Rasolofoarivao	P0Q	A1	x	A	214	214	96	102	175	181	149	149	133	137	128	128	184	184	106	108	220	228	169	169	94	94	233	247	102	102	129	183
63	Sb131	Madagascar	-	MDG11	-14.27	50.15	2011	H. Rasolofoarivao	P0Q	A1	x	A	210	214	96	102	181	181	147	149	133	137	128	128	184	230	106	106	230	232	169	169	94	94	239	239	102	102	129	181
64	Sb132	Madagascar	-	MDG11	-14.27	50.15	2011	H. Rasolofoarivao	P0Q	A1	x	A	210	212	102	102	181	181	136	136	133	137	128	128	184	184	106	106	230	230	169	169	94	94	233	233	102	102	127	183
65	Sb133	Madagascar	-	MDG11	-14.27	50.15	2011	H. Rasolofoarivao	P0Q	A1	x	A	210	214	96	102	181	181	147	149	133	133	128	128	184	184	106	106	220	220	169	169	94	107	239	239	102	102	129	177
66	Sb134	Madagascar	-	MDG11	-14.27	50.15	2011	H. Rasolofoarivao	P0Q	A1	x	A	210	212	102	102	181	183	147	149	133	133	128	128	184	234	106	106	220	230	169	169	94	94	NA	NA	102	102	181	181
67	Sb135	Madagascar	-	MDG11	-14.27	50.15	2011	H. Rasolofoarivao	P0Q	A1	x	A	210	212	102	102	181	181	136	147	133	137	128	128	184	184	106	106	220	220	NA	NA	94	94	NA	NA	94	102	129	181
68	Sb136	Madagascar	-	MDG11	-14.27	50.15	2011	H. Rasolofoarivao	P0Q	A1	x	A	210	210	102	102	181	181	136	147	133	133	128	128	230	234	106	106	220	234	169	169	94	107	233	233	102	102	129	181
69	Sb137	Madagascar	-	MDG11	-14.27	50.15	2011	H. Rasolofoarivao	P0Q	A1	x	A	210	214	96	102	181	181	147	149	132	137	128	128	184	184	106	106	228	230	169	169	94	94	233	233	102	102	129	183
70	Sb139	Madagascar	-	MDG11	-14.27	50.15	2011	H. Rasolofoarivao	P0Q	A1	x	A	214	214	102	102	179	181	136	136	137	137	128	128	226	230	106	106	220	220	169	169	94	94	235	241	102	102	129	179
71	Sb140	Madagascar	-	MDG11	-14.27	50.15	2011	H. Rasolofoarivao	P0Q	A1	x	A	210	210	102	102	181	181	136	147	133	133	128	128	232	232	106	106	220	220	169	169	94	107	225	233	98	102	129	181
72	Sb144	Madagascar	-	MDG11	-14.27	50.15	2011	H. Rasolofoarivao	P0Q	A1	x	A	210	210	96	102	181	181	136	147	133	137	128	130	184	230	106	110	220	230	169	169	94	107	233	233	102	102	129	181
73	Sb112	Madagascar	-	MDG12	-14.27	50.14	2011	H. Rasolofoarivao	P0Q	A1	x	A	212	212	96	102	181	181	147	147	133	137	128	128	184	230	106	110	220	230	169	169	107	107	NA	NA	102	102	NA	NA
74	Sb113	Madagascar	-	MDG12	-14.27	50.14	2011	H. Rasolofoarivao	P0Q	A1	x	A	210	212	102	102	181	181	136	149	132	133	128	128	184	234	106	106	230	232	169	169	94	94	NA	NA	102	102	127	127
75	Sb114	Madagascar	-	MDG12	-14.27	50.14	2011	H. Rasolofoarivao	P0Q	A1	x	A	214	214	96	102	181	181	149	149	132	133	128	128	184	232	106	106	220	228	169	169	107	107	233	233	96	98	179	183
76	Sb115	Madagascar	-	MDG12	-14.27	50.14	2011	H. Rasolofoarivao	P0Q	A1	x	A	210	214	96	102	175	181	147	149	132	137	128	128	184	184	106	106	230	230	169	169	94	94	NA	NA	102	102	129	129
77	Sb116	Madagascar	-	MDG13	-14.28	50.14	2011	H. Rasolofoarivao	P0Q	A1	x	A	210	210	96	102	181	181	147	149	133	133	128	128	184	184	106	106	230	230	169	169	94	94	233	237	102	102	129	183
78	Sb117	Madagascar	-	MDG13	-14.28	50.14	2011	H. Rasolofoarivao	P0Q	A1	x	A	210	214	96	102	181	181	147	149	137	137	128	128	184	184	106	106	230	230	169	169	94	94	233	233	98	102	129	181
79	Sb118	Madagascar	-	MDG13	-14.28	50.14	2011	H. Rasolofoarivao	P0Q	A1	x	A	210	210	102	102	177	181	136	147	132	133	128	130	184	184	106	106	230	230	169	169	94	94	233	247	102	102	127	127
80	Sb119	Madagascar	-	MDG13	-14.28	50.14	2011	H. Rasolofoarivao	P0Q	A1	x	A	210	210	96	102	181	181	136	147	132	133	128	130	184	184	106	106	230	230	169	169	94	94	233	233	102	102	127	127
81	Sb120	Madagascar	-	MDG13	-14.28	50.14	2011	H. Rasolofoarivao	P0Q	A1	x	A	210	210	102	102	181	181	136	147	137	137	128	128	184	184	106	106	220	230	169	169	94	107	233	233	102	102	181	181
82	Sb121	Madagascar	-	MDG13	-14.28	50.14	2011	H. Rasolofoarivao	P0Q	A1	x	A	210	210	102	102	181	181	136	147	132	137	128	128	184	230	106	110	228	228	169	169	107	107	233	233	102	102	179	179
83	Sb122	Madagascar	-	MDG13	-14.28	50.14	2011	H. Rasolofoarivao	P0Q	A1	x	A	210	212	96	102	177	181	136	136	133	137	128	128	184	224	106	106	228	230	169	169	94	94	NA	NA	102	102	127	127
84	Sb123	Madagascar	-	MDG13	-14.28	50.14	2011	H. Rasolofoarivao	P0Q	A1	x	A	210	212	102	102	181	181	149	149	132	133	128	128	184	232	106	106	230	230	169	169	94	94	239	247	102	102	127	129
85	Sb124	Madagascar	-	MDG13	-14.28	50.14	2011	H. Rasolofoarivao	P0Q	A1	x	A	210	214	92	102	181	181	149	149	133	133	128	128	184	232	106	106	220	220	169	169	94	107	233	239	102	102	127	127
86	Sb125	Madagascar	-	MDG13	-14.28	50.14	2011	H. Rasolofoarivao	P0Q	A1	x	A	210	210	102	102	181	181	136	149	133	137	128	128	184	184	106	106	230	232	169	169	94	107	NA	NA	102	104	127	129
87	Sb126	Madagascar	-	MDG13	-14.28	50.14	2011	H. Rasolofoarivao	P0Q	A1	x	A	210	212	102	102	181	181	136	147	133	137	128	128	184	238	106	106	220	230	169	169	94	107	233	239	102	102	127	129
88	Sb078	Madagascar	-	MDG14	-14.27	50.14	2011	H. Rasolofoarivao	P0Q	A1	A1_MAD5	A	212	214	102	102	181	181	149	149	133	137	128	128	184	184	106	106	220	230	169	169	94	94	233	239	102	102	181	183
89	Sb079	Madagascar	-	MDG14	-14.27	50.14	2011	H. Rasolofoarivao	P0Q	A1	A1_MAD3	A	210	210	102	102	181	181	136	147	137	137	128	128	184	230	106	106	220	230	169	169	94	94	233	239	102	102	181	183
90	Sb080	Madagascar	-	MDG14	-14.27	50.14	2011	H. Rasolofoarivao	P0Q	A1	A1_MAD3	A	NA	NA	102	102	NA	NA	147	149	137	137	128	128	184	184	106	110	230	230	169	169	107	107	233	239	96	102	127	129
91	Sb088	Madagascar	-	MDG15	-14.32	50.08	2011	H. Rasolofoarivao	P0Q	A1	A1_MAD3	A	210	214	96	102	175	181	147	147	133	137	128	128	184	234	106	106	230	232	169	169	94	94	233	239	98	102	181	181
92	Sb089	Madagascar	-	MDG15	-14.32	50.08	2011	H. Rasolofoarivao	P0Q	A1	A1_MAD3	A	210	210	102	102	179	181	136	149	133	137	128	128	184	234	106	106	220	232	169	169	94	107	231	233	102	102	127	127
93	Sb090	Madagascar	-	MDG15	-14.32	50.08	2011	H. Rasolofoarivao	P0Q	A1	A1_MAD3	A	210	210	NA	NA	NA	NA	149	149	132	133	128	128	184	184	106	106	230	230	169	169	94	94	239	239	102	102	181	185
94	Sb091	Madagascar	-	MDG15	-14.32	50.08	2011	H. Rasolofoarivao	P0Q	A1	A1_MAD3	A	214	214	102	102	175	181	147	149	133	137	128	128	184	234	106	106	220	232	169	169	94	107	233	237	98	102	129	185
95	Sb092	Madagascar	-	MDG15	-14.32	50.08	2011	H. Rasolofoarivao	P0Q	A1	A1_MAD3	A	210	214	102	102	181	181	147	149	137	137	128	128	184	234	106	106	228	230	169	169	94	107	233	239	102	102	127	181
96	Sb093	Madagascar	-	MDG15	-14.32	50.08	2011	H. Rasolofoarivao	P0Q	A1	x	A	212	212	102	102	181	181	147	149	133	137	128	130	NA	NA	106	106	230	230	NA	NA	NA	NA	NA	NA	94	94	NA	NA
97	Sb094	Madagascar	-	MDG15	-14.32	50.08	2011	H. Rasolofoarivao	P0Q	A1	x	A	210	214	96	102	181	181	147	147	133	133	128	128	184	184	106	106	230	232	169	169	94	107	239	239	102	102	129	187
98	Sb095	Madagascar	-	MDG15	-14.32	50.08	2011	H. Rasolofoarivao	P0Q	A1	x	A	210	212	102	102	181	183	149	149	137	137	128	128	184	230	106	106	220	230	169	169	94	94	233	239	98	102	179	183
99	Sb096	Madagascar	-	MDG15	-14.32	50.08	2011	H. Rasolofoarivao	P0Q	A1	x	A	210	210	102	102	181	181	136	147	132	137	128	128	NA	NA	106	106	230	230	169	169	107	107	NA	NA	102	104	127	127
100	Sb097	Madagascar	-	MDG15	-14.32	50.08	2011	H. Rasolofoarivao	P0Q	A1	x	A	210	210	102	102	181	181	136	147	133	137	128	128	184	232	106	106	230	230	169	169	94	94	233	233	102	102	129	129
101	Sb098	Madagascar	-	MDG15	-14.32	50.08	2011	H. Rasolofoarivao	P0Q	A1	x	A	212	212	96	102	181	181	149	149	137	137	128	128	230	230	106	106	228	232	169	169	107	107	233	235	98	102	129	129
102	Sb099	Madagascar	-	MDG15	-14.32	50.08	2011	H. Rasolofoarivao	P0Q	A1	x	A	210	210	96	102	177	181	136	149	132	133	128	128	184	230	106	106	230	232	169	169	94	94	233	233	98	102	129	129
103	Sb100	Madagascar	-	MDG15	-14.32	50.08	2011	H. Rasolofoarivao	P0Q	A1	x	A	210	214	102	102	175	181	136	147	137	137	128	128	184	232	106	106	220	230	169	169	94	94	233	233	102	102	129	129
104	Sb101	Madagascar	-	MDG15	-14.32	50.08	2011	H. Rasolofoarivao	P0Q	A1	x	A	212	214	102	102	181	181	149	149	133	137	128	128	184	184	106	106	228	232	169	169	94	107	233	241	102	102	129	183
105	Sb102	Madagascar	-	MDG15	-14.32	50.08	2011	H. Rasolofoarivao	P0Q	A1	x	A	210	214	96	102	175	181	147	147	137	137	128	128	184	230	106	106	230	230	169	169	94	107	241	241	102	102	129	185
106	Sb103	Madagascar	-	MDG15	-14.32	50.08	2011	H. Rasolofoarivao	P0Q	A1	x	A	210	212	102	102	181	181	149	149	132	133	128	128	NA	NA	106	106	220	230	169	177	94	107	NA	NA	102	102	129	129
107	Sb104	Madagascar	-	MDG15	-14.32	50.08	2011	H. Rasolofoarivao	P0Q	A1	x	A	210	214	102	102	181	181	136	149	133	137	128	128	184	184	106	106	220	220	169	169	94	107	233	233	96	102	NA	NA
108	Sb105	Madagascar	-	MDG15	-14.32	50.08	2011	H. Rasolofoarivao	P0Q	A1	x	A	210	212	102	102	181	181	136	136	133	137	128	128	184	232	106	106	228	230	169	169	94	94	233	239	102	102	127	183
109	Sb106	Madagascar	-	MDG15	-14.32	50.08	2011	H. Rasolofoarivao	P0Q	A1	x	A	210	214	102	102	181	181	136	149	132	137	128	128	184	230	106	106	230	230	169	169	107	107	233	233	102	102	127	129
110	Sb107	Madagascar	-	MDG15	-14.32	50.08	2011	H. Rasolofoarivao	P0Q	A1	x	A	212	214	NA	NA	175	181	136	149	133	133	128	128	184	184	106	106	220	220	169	169	107	107	233	247	102	102	129	181
111	Sb108	Madagascar	-	MDG15	-14.32	50.08	2011	H. Rasolofoarivao	P0Q	A1	x	A	210	214	102	102	181	181	147	149	137	137	128	128	230	230	106	106	220	230	169	169	94	94	233	233	98	102	127	181
112	Sb109	Madagascar	-	MDG15	-14.32	50.08	2011	H. Rasolofoarivao	P0Q	A1	x	A	210	212	102	102	181	181	147	147	133	137	128	128	NA	NA	106	106	220	230	169	169	94	94	233	239	102	102	127	185
113	Sb110	Madagascar	-	MDG15	-14.32	50.08	2011	H. Rasolofoarivao	P0Q	A1	x	A	212	212	96	96	181	181	136	136	137	137	128	128	184	184	106	106	226	230	169	169	107	107	233	241	96	102	175	183
114	Sb111	Madagascar	-	MDG15	-14.32	50.08	2011	H. Rasolofoarivao	P0Q	A1	x	A	210	214	102	102	181	181	147	149	137	137	128	128	230	236	106	106	228	230	169	169	94	94	233	239	102	102	179	181
115	Sb086	Madagascar	-	MDG16	-14.32	50.19	2011	H. Rasolofoarivao	P0Q	A1	A1_MAD3	A	210	212	NA	NA	181	181	149	149	133	137	128	128	184	184	106	106	220	228	169	169	94	107	233	239	98	102	129	129
116	Sb087	Madagascar	-	MDG16	-14.32	50.19	2011	H. Rasolofoarivao	P0Q	A1	A1_MAD3	A	210	210	102	102	181	181	136	149	133	137	128	128	184	184	106	110	230	230	169	169	94	107	237	239	102	106	129	181
117	Sb081	Madagascar	-	MDG16	-14.32	50.19	2011	H. Rasolofoarivao	P0Q	A1	x	A	210	212	102	102	175	181	147	149	133	133	128	128	184	184	106	106	220	230	NA	NA	107	109	NA	NA	NA	NA	NA	NA
118	Sb082	Madagascar	-	MDG16	-14.32	50.19	2011	H. Rasolofoarivao	P0Q	A1	x	A	214	214	96	102	181	181	136	149	132	137	128	130	184	184	106	106	220	232	169	169	94	94	233	233	102	102	129	181
119	Sb083	Madagascar	-	MDG16	-14.32	50.19	2011	H. Rasolofoarivao	P0Q	A1	x	A	210	212	102	102	181	181	149	149	137	137	128	128	NA	NA	106	106	220	230	NA	NA	NA	NA	NA	NA	102	102	NA	NA
120	Sb084	Madagascar	-	MDG16	-14.32	50.19	2011	H. Rasolofoarivao	P0Q	A1	x	A	NA	NA	NA	NA	NA	NA	147	147	133	133	128	130	184	184	106	106	NA	NA	169	169	94	94	233	239	102	102	177	183
121	Sb085	Madagascar	-	MDG16	-14.32	50.19	2011	H. Rasolofoarivao	P0Q	A1	x	A	210	214	102	102	179	181	136	147	137	137	128	130	184	226	106	106	220	230	169	169	94	94	233	241	102	102	129	181
122	At73	Madagascar	-	MDG17	-14.87	49.99	2011	H. Rasolofoarivao	P0Q	A1	x	A	210	210	102	102	181	181	136	149	137	137	128	128	184	184	106	106	230	230	169	169	94	94	233	235	102	102	129	183
123	At74	Madagascar	-	MDG17	-14.87	49.99	2011	H. Rasolofoarivao	P0Q	A1	x	A	210	212	96	102	181	181	136	149	132	133	128	128	230	232	106	106	230	230	169	169	94	107	233	237	98	102	175	177
124	At75	Madagascar	-	MDG17	-14.87	49.99	2011	H. Rasolofoarivao	P0Q	A1	x	A	210	212	102	102	181	181	136	147	133	137	128	128	186	232	106	106	230	230	169	169	94	107	233	239	98	102	129	187
125	At76	Madagascar	-	MDG17	-14.87	49.99	2011	H. Rasolofoarivao	P0Q	A1	x	A	212	214	102	102	181	181	136	149	132	137	128	128	184	230	106	110	220	220	169	169	94	107	233	233	98	102	129	129
126	At77	Madagascar	-	MDG17	-14.87	49.99	2011	H. Rasolofoarivao	P0Q	A1	x	A	212	212	96	102	181	181	136	147	133	137	128	128	230	232	106	106	220	230	169	169	94	94	233	235	96	102	127	181
127	At60	Madagascar	-	MDG18	-14.92	50.3	2011	H. Rasolofoarivao	P0Q	A1	A1_MAD5	A	210	212	96	102	181	181	136	147	133	137	128	128	184	184	106	106	230	230	169	169	94	94	233	239	98	102	127	129
128	At61	Madagascar	-	MDG18	-14.92	50.3	2011	H. Rasolofoarivao	P0Q	A1	A1_MAD7	A	210	214	96	102	181	181	149	149	132	133	128	128	232	236	106	106	220	220	169	169	94	107	239	239	102	102	129	183
129	At62	Madagascar	-	MDG18	-14.92	50.3	2011	H. Rasolofoarivao	P0Q	A1	A1_MAD3?	A	210	212	96	102	181	181	136	147	137	137	128	128	184	234	106	106	220	230	169	169	94	94	233	239	98	102	129	183
130	At63	Madagascar	-	MDG18	-14.92	50.3	2011	H. Rasolofoarivao	P0Q	A1	x	A	210	212	102	102	181	181	147	149	137	137	128	128	184	232	106	106	220	230	169	169	94	107	233	239	102	102	129	183
131	At64	Madagascar	-	MDG18	-14.92	50.3	2011	H. Rasolofoarivao	P0Q	A1	x	A	210	214	96	102	181	181	136	147	132	133	128	128	184	226	106	106	220	230	169	169	94	94	233	239	102	102	129	183
132	At66	Madagascar	-	MDG18	-14.92	50.3	2011	H. Rasolofoarivao	P0Q	A1	x	A	210	212	96	102	181	181	136	147	137	137	128	128	184	232	106	106	220	232	169	169	94	94	233	233	102	102	129	181
133	At67	Madagascar	-	MDG18	-14.92	50.3	2011	H. Rasolofoarivao	P0Q	A1	x	A	210	212	102	102	181	181	136	149	133	137	128	128	184	184	106	106	220	230	169	169	94	94	239	249	102	102	129	129
134	At68	Madagascar	-	MDG18	-14.92	50.3	2011	H. Rasolofoarivao	P0Q	A1	x	A	210	210	102	102	181	181	147	149	137	137	128	130	228	232	106	106	220	220	169	169	94	107	NA	NA	102	102	129	129
135	At69	Madagascar	-	MDG18	-14.92	50.3	2011	H. Rasolofoarivao	P0Q	A1	x	A	NA	NA	102	102	NA	NA	149	149	132	137	128	128	184	184	106	106	220	220	NA	NA	94	107	NA	NA	102	102	NA	NA
136	At70	Madagascar	-	MDG18	-14.92	50.3	2011	H. Rasolofoarivao	P0Q	A1	x	A	210	212	102	102	181	181	136	149	132	133	128	128	184	238	106	110	220	230	169	169	94	107	233	239	98	102	129	183
137	At72	Madagascar	-	MDG18	-14.92	50.3	2011	H. Rasolofoarivao	P0Q	A1	x	A	210	212	96	102	175	181	136	136	133	137	128	128	184	184	106	110	NA	NA	169	169	94	107	233	239	98	102	127	183
138	Bef06	Madagascar	-	MDG19	-15.16	48.45	2011	H. Rasolofoarivao	P0Q	A1	x	A	210	210	102	102	181	181	149	149	NA	NA	128	128	NA	NA	106	106	NA	NA	169	169	94	94	233	233	102	102	NA	NA
139	Bef07	Madagascar	-	MDG19	-15.16	48.45	2011	H. Rasolofoarivao	P0Q	A1	x	A	210	212	96	102	181	181	147	149	NA	NA	NA	NA	NA	NA	106	106	NA	NA	169	169	94	94	233	233	102	102	NA	NA
140	Bo01	Madagascar	-	MDG20	-15.7	46.36	2011	H. Rasolofoarivao	P0Q	A1	A1_MAD3	A	212	212	96	102	181	181	149	149	137	137	128	128	184	184	106	106	220	230	169	169	94	107	233	247	98	102	181	181
141	Bo02	Madagascar	-	MDG20	-15.7	46.36	2011	H. Rasolofoarivao	P0Q	A1	A1_MAD3	A	212	212	102	102	175	181	149	149	133	137	128	128	184	188	106	106	220	230	169	169	94	94	233	247	102	102	179	185
142	Bo03	Madagascar	-	MDG20	-15.7	46.36	2011	H. Rasolofoarivao	P0Q	A1	A1_MAD3	A	212	212	102	102	179	181	136	149	133	137	128	128	184	184	106	106	220	220	169	169	94	107	233	239	98	102	129	181
143	Bo04	Madagascar	-	MDG20	-15.7	46.36	2011	H. Rasolofoarivao	P0Q	A1	x	A	212	212	102	102	175	181	136	149	137	137	126	128	184	232	106	106	220	230	169	169	94	107	235	247	102	102	183	185
144	Bo05	Madagascar	-	MDG20	-15.7	46.36	2011	H. Rasolofoarivao	P0Q	A1	x	A	212	212	102	102	175	181	136	136	133	137	128	128	184	230	106	106	230	230	169	169	94	94	233	239	102	104	129	189
145	Bo06	Madagascar	-	MDG20	-15.7	46.36	2011	H. Rasolofoarivao	P0Q	A1	x	A	210	212	102	102	181	181	149	149	133	137	126	128	230	234	106	106	230	232	169	169	94	94	233	233	102	102	129	179
146	Bo07	Madagascar	-	MDG20	-15.7	46.36	2011	H. Rasolofoarivao	P0Q	A1	x	A	210	214	96	102	181	181	136	149	133	137	128	128	184	184	106	106	220	230	169	169	94	94	233	233	102	102	127	187
147	Bo08	Madagascar	-	MDG20	-15.7	46.36	2011	H. Rasolofoarivao	P0Q	A1	x	A	210	212	102	102	181	181	136	147	137	137	128	128	184	184	106	106	230	230	169	169	94	94	235	237	102	102	129	181
148	Bo09	Madagascar	-	MDG20	-15.7	46.36	2011	H. Rasolofoarivao	P0Q	A1	x	A	210	212	102	102	181	181	136	149	133	137	126	128	184	232	106	106	220	220	169	169	94	107	233	233	98	104	179	183
149	Bo10	Madagascar	-	MDG20	-15.7	46.36	2011	H. Rasolofoarivao	P0Q	A1	x	A	212	214	96	102	181	181	136	147	137	137	128	128	184	184	106	106	220	230	169	169	107	107	233	233	98	102	129	181
150	Bo18	Madagascar	-	MDG21	-15.72	46.33	2011	H. Rasolofoarivao	P0Q	A1	A1_MAD3	A	212	214	102	102	175	181	136	149	133	137	128	128	184	188	106	106	220	228	169	169	94	94	233	233	98	102	181	185
151	Bo19	Madagascar	-	MDG21	-15.72	46.33	2011	H. Rasolofoarivao	P0Q	A1	A1_MAD3	A	210	212	102	102	181	181	136	147	132	133	128	128	184	184	106	106	228	228	169	169	94	94	233	233	98	102	181	183
152	Bo20	Madagascar	-	MDG21	-15.72	46.33	2011	H. Rasolofoarivao	P0Q	A1	A1_MAD3	A	212	212	96	102	181	181	136	149	132	133	128	128	184	184	106	110	220	220	169	169	94	94	233	233	98	98	129	183
153	Bo21	Madagascar	-	MDG21	-15.72	46.33	2011	H. Rasolofoarivao	P0Q	A1	A1_MAD3	A	210	210	102	102	181	181	147	149	133	133	128	128	230	232	106	106	228	230	169	169	94	107	233	233	98	102	181	187
154	Bo22	Madagascar	-	MDG21	-15.72	46.33	2011	H. Rasolofoarivao	P0Q	A1	A1_MAD3	A	212	214	102	102	175	181	136	136	133	133	128	128	184	228	106	110	228	230	169	169	94	107	233	233	102	102	183	189
155	Bo24	Madagascar	-	MDG21	-15.72	46.33	2011	H. Rasolofoarivao	P0Q	A1	A1_MAD3	A	210	212	102	102	181	183	136	147	132	132	128	128	184	232	106	110	220	220	169	169	94	94	233	233	102	102	183	183
156	Bo25	Madagascar	-	MDG21	-15.72	46.33	2011	H. Rasolofoarivao	P0Q	A1	A1_MAD3	A	212	212	102	102	181	181	147	149	133	137	128	128	184	184	106	106	220	228	NA	NA	NA	NA	NA	NA	102	102	129	129
157	Bo11	Madagascar	-	MDG21	-15.72	46.33	2011	H. Rasolofoarivao	P0Q	A1	x	A	210	212	96	96	181	181	136	149	133	137	128	128	184	184	106	106	220	220	169	169	94	94	233	239	98	102	179	185
158	Bo12	Madagascar	-	MDG21	-15.72	46.33	2011	H. Rasolofoarivao	P0Q	A1	x	A	210	212	102	102	181	181	136	149	133	133	128	128	184	232	106	106	230	232	169	169	94	107	233	247	102	102	127	187
159	Bo13	Madagascar	-	MDG21	-15.72	46.33	2011	H. Rasolofoarivao	P0Q	A1	x	A	210	212	102	102	181	181	136	149	133	137	128	128	184	184	106	106	220	220	169	169	94	94	233	239	98	98	129	181
160	Bo14	Madagascar	-	MDG21	-15.72	46.33	2011	H. Rasolofoarivao	P0Q	A1	x	A	210	210	96	102	181	181	147	149	133	137	128	128	184	184	106	110	220	220	169	169	94	94	235	235	102	102	179	181
161	Bo15	Madagascar	-	MDG21	-15.72	46.33	2011	H. Rasolofoarivao	P0Q	A1	x	A	210	210	96	96	181	181	136	147	133	137	128	128	184	184	106	106	220	230	169	169	94	94	233	239	102	102	183	187
162	Bo16	Madagascar	-	MDG21	-15.72	46.33	2011	H. Rasolofoarivao	P0Q	A1	x	A	210	212	102	102	181	181	136	149	137	137	128	128	184	184	106	106	220	220	169	169	94	94	233	239	96	102	129	179
163	Bo17	Madagascar	-	MDG21	-15.72	46.33	2011	H. Rasolofoarivao	P0Q	A1	x	A	210	212	102	102	181	181	136	149	133	133	128	128	184	184	106	110	230	232	169	169	94	107	233	233	102	102	127	187
164	Bo23	Madagascar	-	MDG21	-15.72	46.33	2011	H. Rasolofoarivao	P0Q	A1	x	A	212	212	102	102	181	181	136	147	133	133	128	128	184	232	106	106	230	232	169	169	94	107	233	247	102	102	183	185
165	Bo26	Madagascar	-	MDG22	-16.37	47.05	2011	H. Rasolofoarivao	P0Q	A1	A1_MAD3	A	212	212	96	102	181	181	136	147	132	133	128	128	184	184	106	106	228	232	169	169	94	94	237	249	96	98	179	179
166	Bo27	Madagascar	-	MDG22	-16.37	47.05	2011	H. Rasolofoarivao	P0Q	A1	A1_MAD3	A	210	212	102	102	181	181	136	149	133	137	128	128	184	234	106	106	220	230	169	169	94	94	233	233	102	102	179	183
167	Bo28	Madagascar	-	MDG22	-16.37	47.05	2011	H. Rasolofoarivao	P0Q	A1	A1_MAD10	A	210	214	102	102	175	181	136	149	137	137	126	128	184	230	106	106	228	232	169	169	94	94	233	233	102	102	129	179
168	Bo29	Madagascar	-	MDG22	-16.37	47.05	2011	H. Rasolofoarivao	P0Q	A1	A1_MAD3	A	208	210	96	102	181	181	147	147	133	137	128	128	184	234	106	110	230	230	169	169	94	107	233	233	96	102	181	183
169	Bo30	Madagascar	-	MDG22	-16.37	47.05	2011	H. Rasolofoarivao	P0Q	A1	A1_MAD3	A	210	212	96	102	181	181	136	149	137	137	128	128	184	228	106	106	230	230	169	169	94	94	233	233	102	102	129	183
170	Bo31	Madagascar	-	MDG22	-16.37	47.05	2011	H. Rasolofoarivao	P0Q	A1	x	A	212	214	102	102	181	181	136	149	137	137	128	130	184	232	106	106	220	220	169	169	94	94	233	235	102	102	129	181
171	Bo32	Madagascar	-	MDG22	-16.37	47.05	2011	H. Rasolofoarivao	P0Q	A1	x	A	206	210	102	102	175	181	136	149	137	137	128	128	184	232	106	106	230	230	169	169	94	107	233	247	98	102	129	179
172	Bo33	Madagascar	-	MDG22	-16.37	47.05	2011	H. Rasolofoarivao	P0Q	A1	x	A	212	212	96	102	181	181	136	147	132	133	128	128	184	184	106	106	230	232	169	169	94	107	233	237	98	102	181	181
173	Bo34	Madagascar	-	MDG22	-16.37	47.05	2011	H. Rasolofoarivao	P0Q	A1	x	A	212	212	102	102	181	181	136	149	133	137	128	128	184	184	106	110	220	230	169	169	94	94	233	233	102	102	183	183
174	Bo35	Madagascar	-	MDG22	-16.37	47.05	2011	H. Rasolofoarivao	P0Q	A1	x	A	210	212	102	102	181	181	149	149	133	133	128	128	184	238	106	106	214	230	169	169	94	94	233	247	98	102	129	181
175	Bo36	Madagascar	-	MDG23	-16.34	46.86	2011	H. Rasolofoarivao	P0QQ	A4	A4_MAD2	A	210	214	102	102	181	181	136	149	132	133	128	130	184	184	106	106	220	230	169	169	94	107	233	239	102	102	129	181
176	Bo37	Madagascar	-	MDG23	-16.34	46.86	2011	H. Rasolofoarivao	P0Q	A1	A1_MAD3	A	210	210	102	102	181	181	136	147	133	137	128	128	NA	NA	106	106	230	232	NA	NA	94	107	233	239	102	102	181	185
177	Bo38	Madagascar	-	MDG23	-16.34	46.86	2011	H. Rasolofoarivao	P0Q	A1	A1_MAD3	A	210	210	102	102	181	181	147	149	133	133	126	128	184	184	106	106	230	230	169	169	94	107	233	233	102	102	183	183
178	Bo39	Madagascar	-	MDG23	-16.34	46.86	2011	H. Rasolofoarivao	P0Q	A1	x	A	NA	NA	96	102	NA	NA	149	149	133	133	128	128	184	228	106	106	230	230	169	169	107	107	233	233	98	102	129	181
179	Bo40	Madagascar	-	MDG23	-16.34	46.86	2011	H. Rasolofoarivao	P0Q	A1	x	A	212	214	102	102	181	181	147	147	132	133	128	128	228	232	106	106	220	230	169	169	94	107	233	233	102	102	181	183
180	FERant05	Madagascar	-	MDG24	-17.24	49.44	2013	H. Rasolofoarivao	P0Q	A1	A1_MAD3	A	210	210	96	96	181	181	NA	NA	132	137	NA	NA	NA	NA	106	106	NA	NA	169	169	94	107	NA	NA	102	102	129	129
181	FERant07	Madagascar	-	MDG24	-17.24	49.44	2013	H. Rasolofoarivao	P0Q	A1	A1_MAD3	A	210	210	96	102	181	181	149	149	133	137	128	128	184	184	106	106	230	232	169	169	94	94	233	237	102	102	129	129
182	FERant08	Madagascar	-	MDG24	-17.24	49.44	2013	H. Rasolofoarivao	P0Q	A1	A1_MAD3	A	212	212	96	102	181	181	147	149	137	137	128	128	184	184	106	110	220	220	169	169	94	94	233	239	102	102	NA	NA
183	FERant10	Madagascar	-	MDG24	-17.24	49.44	2013	H. Rasolofoarivao	P0Q	A1	x	A	210	212	102	102	181	181	149	149	133	137	128	128	184	184	106	106	220	230	169	169	94	94	233	233	102	102	NA	NA
184	FERant12	Madagascar	-	MDG24	-17.24	49.44	2013	H. Rasolofoarivao	P0Q	A1	x	A	212	212	102	102	181	181	136	136	NA	NA	NA	NA	NA	NA	106	106	220	220	169	169	94	107	233	233	NA	NA	NA	NA
185	FEMaha19	Madagascar	-	MDG25	-17.49	49.46	2013	H. Rasolofoarivao	P0Q	A1	A1_MAD3	A	210	212	102	102	175	181	147	149	133	137	128	128	184	184	106	106	220	220	169	169	94	107	235	235	102	102	129	129
186	FEFve22	Madagascar	-	MDG26	-17.68	49.51	2013	H. Rasolofoarivao	P0Q	A1	x	A	210	210	102	102	181	185	136	149	132	133	128	130	184	184	106	106	230	230	169	169	94	94	233	239	NA	NA	NA	NA
187	FEFve25	Madagascar	-	MDG26	-17.68	49.51	2013	H. Rasolofoarivao	P0Q	A1	x	A	210	210	96	102	NA	NA	136	136	137	137	128	128	186	186	106	106	228	230	NA	NA	NA	NA	NA	NA	94	94	NA	NA
188	FEFeno05	Madagascar	-	MDG27	-17.7	49.5	2013	H. Rasolofoarivao	P0Q	A1	x	A	214	214	96	102	181	181	136	149	132	133	128	128	184	184	106	106	NA	NA	169	169	94	94	NA	NA	96	102	129	183
189	FEFeno06	Madagascar	-	MDG27	-17.7	49.5	2013	H. Rasolofoarivao	P0Q	A1	x	A	210	212	102	102	175	181	137	147	128	134	128	128	184	184	106	110	216	216	169	169	94	107	NA	NA	102	102	NA	NA
190	FETve01	Madagascar	-	MDG28	-17.77	49.41	2013	H. Rasolofoarivao	P0Q	A1	A1_MAD3	A	210	212	102	102	181	181	136	147	137	137	128	128	184	184	106	106	228	232	NA	NA	NA	NA	NA	NA	94	102	129	141
191	FETve02	Madagascar	-	MDG28	-17.77	49.41	2013	H. Rasolofoarivao	P0Q	A1	A1_MAD3	A	210	210	96	96	NA	NA	136	149	132	137	128	128	184	184	106	106	230	232	NA	NA	NA	NA	NA	NA	94	102	129	129
192	FETAM1	Madagascar	-	MDG28	-17.77	49.41	2013	H. Rasolofoarivao	P0Q	A1	x	A	210	214	102	102	181	181	147	149	137	137	128	128	184	184	106	106	220	232	169	169	94	94	NA	NA	102	102	127	127
193	BVIL01	Madagascar	-	MDG29	-18.74	48.98	2013	H. Rasolofoarivao	P0Q	A48	A1_MAD13	A	212	212	NA	NA	NA	NA	136	149	133	137	128	128	184	184	106	106	220	230	169	169	94	94	233	239	102	102	179	183
194	BVIL02	Madagascar	-	MDG29	-18.74	48.98	2013	H. Rasolofoarivao	P0Q	A1	A1_MAD3	A	210	212	NA	NA	181	181	147	147	133	137	128	128	184	184	106	110	220	220	169	169	94	94	233	247	102	102	129	183
195	MOGA02	Madagascar	-	MDG30	-18.95	48.24	2013	H. Rasolofoarivao	P0Q	A1	x	A	210	210	98	102	181	181	136	147	132	137	128	128	184	232	106	106	230	232	NA	NA	107	107	NA	NA	102	102	NA	NA
196	MOGA03	Madagascar	-	MDG30	-18.95	48.24	2013	H. Rasolofoarivao	P0Q	A1	x	A	210	212	96	102	181	181	136	147	133	137	128	128	184	184	106	106	220	230	169	169	94	94	233	241	102	102	129	181
197	Mlina01	Madagascar	-	MDG31	-18.34	47.88	2013	H. Rasolofoarivao	P0Q	A1	A1_MAD3	A	210	214	102	102	181	181	147	149	133	137	128	128	184	232	106	106	234	234	NA	NA	94	94	NA	NA	102	102	127	129
198	Mlina02	Madagascar	-	MDG31	-18.34	47.88	2013	H. Rasolofoarivao	P0Q	A1	A1_MAD3	A	212	212	102	102	181	181	147	149	133	137	128	128	184	184	106	106	228	234	NA	NA	NA	NA	NA	NA	98	102	177	183
199	Mlina03	Madagascar	-	MDG31	-18.34	47.88	2013	H. Rasolofoarivao	P0Q	A1	A1_MAD3	A	212	212	96	102	175	181	147	149	137	137	128	128	184	230	106	106	230	230	NA	NA	94	107	NA	NA	98	102	177	183
200	Mlina04	Madagascar	-	MDG31	-18.34	47.88	2013	H. Rasolofoarivao	P0Q	A1	x	A	210	210	102	102	181	181	147	149	137	137	128	128	184	184	106	106	230	230	169	169	94	107	233	247	102	102	129	183
201	Mlina05	Madagascar	-	MDG31	-18.34	47.88	2013	H. Rasolofoarivao	P0Q	A1	x	A	212	214	102	102	175	181	136	149	137	137	128	128	184	232	106	106	228	230	169	169	94	107	239	247	98	102	183	185
202	Mlina06	Madagascar	-	MDG31	-18.34	47.88	2013	H. Rasolofoarivao	P0Q	A1	x	A	210	210	98	102	181	181	147	147	132	133	128	128	184	184	106	106	NA	NA	NA	NA	94	94	NA	NA	102	102	NA	NA
203	Mlina07	Madagascar	-	MDG31	-18.34	47.88	2013	H. Rasolofoarivao	P0Q	A1	x	A	210	212	96	102	181	181	147	149	133	137	128	128	184	232	106	106	230	234	169	169	94	94	239	247	98	102	127	127
204	Mlina08	Madagascar	-	MDG31	-18.34	47.88	2013	H. Rasolofoarivao	P0Q	A1	x	A	210	210	98	102	181	181	136	136	133	137	128	130	184	184	106	106	230	230	169	169	107	107	233	247	98	102	129	129
205	Mlina09	Madagascar	-	MDG31	-18.34	47.88	2013	H. Rasolofoarivao	P0Q	A1	x	A	210	212	102	102	181	181	147	149	NA	NA	NA	NA	NA	NA	106	106	NA	NA	169	169	107	107	NA	NA	102	102	129	129
206	TNAtsy01	Madagascar	-	MDG32	-18.62	47.68	2013	H. Rasolofoarivao	P0Q	A1	A1_MAD3	A	212	212	96	102	181	181	149	149	132	133	128	128	184	184	106	106	220	234	169	169	94	94	NA	NA	102	102	NA	NA
207	TNAtsy02	Madagascar	-	MDG32	-18.62	47.68	2013	H. Rasolofoarivao	P0Q	A1	x	A	212	214	96	102	181	181	149	149	132	137	128	128	184	184	106	106	220	234	169	169	94	94	NA	NA	102	102	129	129
208	TNAtsy03	Madagascar	-	MDG32	-18.62	47.68	2013	H. Rasolofoarivao	P0Q	A1	x	A	212	214	96	102	175	181	136	149	133	137	128	128	184	184	106	106	228	230	169	169	94	107	239	247	98	102	129	185
209	TNAtsy04	Madagascar	-	MDG32	-18.62	47.68	2013	H. Rasolofoarivao	P0Q	A1	x	A	210	212	96	96	181	181	149	149	133	137	128	128	184	184	106	106	220	234	169	169	94	94	233	233	102	102	129	129
210	TNAtsy05	Madagascar	-	MDG32	-18.62	47.68	2013	H. Rasolofoarivao	P0Q	A1	x	A	210	214	102	102	181	181	147	149	133	133	128	128	NA	NA	106	106	NA	NA	169	169	94	94	233	239	98	102	127	127
211	TNAtsy06	Madagascar	-	MDG32	-18.62	47.68	2013	H. Rasolofoarivao	P0Q	A1	x	A	210	214	102	102	181	181	147	149	133	133	128	128	184	184	106	106	230	234	169	169	94	94	233	239	98	102	127	129
212	TNAtsy07	Madagascar	-	MDG32	-18.62	47.68	2013	H. Rasolofoarivao	P0Q	A1	x	A	212	212	102	102	181	181	149	149	132	137	128	128	184	184	106	106	220	230	169	169	94	94	233	237	98	102	129	177
213	TNAtsy08	Madagascar	-	MDG32	-18.62	47.68	2013	H. Rasolofoarivao	P0Q	A1	x	A	212	212	102	102	181	181	136	136	132	133	130	130	184	184	106	106	226	232	169	169	94	94	239	247	96	102	129	129
214	TNAmby01	Madagascar	-	MDG33	-18.68	47.75	2013	H. Rasolofoarivao	P0Q	A1	x	A	212	214	102	102	175	181	147	149	133	137	128	128	184	234	106	106	230	230	169	169	94	107	233	239	98	102	129	177
215	TNAmby02	Madagascar	-	MDG33	-18.68	47.75	2013	H. Rasolofoarivao	P0Q	A1	x	A	210	212	102	102	181	181	136	136	132	133	128	128	184	184	106	106	230	230	169	169	94	107	233	247	98	102	129	129
216	TNAmby03	Madagascar	-	MDG33	-18.68	47.75	2013	H. Rasolofoarivao	P0Q	A1	x	A	210	210	102	102	181	181	147	149	132	137	126	128	184	184	106	106	220	230	169	169	94	107	233	247	102	102	129	181
217	TNAmby04	Madagascar	-	MDG33	-18.68	47.75	2013	H. Rasolofoarivao	P0Q	A1	x	A	212	212	102	102	181	181	136	147	132	133	130	130	184	232	106	106	226	232	169	169	94	107	239	247	96	102	129	129
218	TNAmby05	Madagascar	-	MDG33	-18.68	47.75	2013	H. Rasolofoarivao	P0Q	A1	x	A	210	210	102	102	175	181	147	147	132	133	128	130	NA	NA	106	106	220	226	NA	NA	NA	NA	NA	NA	102	102	129	183
219	TNAmby06	Madagascar	-	MDG33	-18.68	47.75	2013	H. Rasolofoarivao	P0Q	A1	x	A	210	212	102	102	181	181	136	136	132	133	128	130	184	232	106	106	230	232	169	169	94	94	NA	NA	96	102	129	129
220	TNAmby07	Madagascar	-	MDG33	-18.68	47.75	2013	H. Rasolofoarivao	P0Q	A1	x	A	212	214	NA	NA	175	181	149	149	132	133	128	128	184	184	106	106	220	230	NA	NA	94	94	NA	NA	102	102	129	177
221	TNAmby08	Madagascar	-	MDG33	-18.68	47.75	2013	H. Rasolofoarivao	P0Q	A1	x	A	NA	NA	96	102	NA	NA	136	136	132	133	130	130	184	184	106	106	226	232	NA	NA	94	107	NA	NA	98	102	129	129
222	TNAheno10	Madagascar	-	MDG34	-18.78	47.8	2013	H. Rasolofoarivao	P0Q	A1	A1_MAD3	A	210	210	102	102	181	181	136	149	133	137	126	126	184	184	106	106	220	220	169	169	94	107	233	239	102	102	129	129
223	TNAheno11	Madagascar	-	MDG34	-18.78	47.8	2013	H. Rasolofoarivao	P0Q	A1	x	A	210	212	102	102	181	181	147	149	133	133	128	128	184	184	106	106	220	220	169	169	94	94	233	239	102	102	177	181
224	TNAheno12	Madagascar	-	MDG34	-18.78	47.8	2013	H. Rasolofoarivao	P0Q	A1	x	A	212	212	102	102	181	181	136	147	132	133	128	128	184	228	106	110	220	230	169	169	94	94	233	247	98	102	127	181
225	TNAheno13	Madagascar	-	MDG34	-18.78	47.8	2013	H. Rasolofoarivao	P0Q	A1	x	A	212	214	102	102	175	181	136	149	132	133	128	130	184	184	106	110	230	230	169	169	94	94	233	239	102	102	129	181
226	TNAheno14	Madagascar	-	MDG34	-18.78	47.8	2013	H. Rasolofoarivao	P0Q	A1	x	A	210	210	102	102	175	181	136	149	135	137	128	128	NA	NA	106	106	230	230	169	169	94	94	233	233	102	102	129	129
227	TNAheno15	Madagascar	-	MDG34	-18.78	47.8	2013	H. Rasolofoarivao	P0Q	A1	x	A	210	212	102	102	181	181	136	149	133	133	128	128	184	232	106	106	230	230	169	169	94	94	233	233	98	102	181	183
228	TNAheno16	Madagascar	-	MDG34	-18.78	47.8	2013	H. Rasolofoarivao	P0Q	A1	x	A	210	210	102	102	175	181	136	136	137	137	128	128	NA	NA	106	106	NA	NA	169	169	94	94	233	239	102	102	179	181
229	TNAheno17	Madagascar	-	MDG34	-18.78	47.8	2013	H. Rasolofoarivao	P0Q	A1	x	A	210	212	102	102	181	181	136	147	133	137	128	128	184	218	106	106	230	232	169	169	94	94	239	247	102	102	129	181
230	TNAheno18	Madagascar	-	MDG34	-18.78	47.8	2013	H. Rasolofoarivao	P0Q	A1	x	A	212	214	102	102	181	181	147	149	133	137	128	128	228	232	106	106	230	230	169	169	94	107	233	233	102	102	181	183
231	TNAheno19	Madagascar	-	MDG34	-18.78	47.8	2013	H. Rasolofoarivao	P0Q	A1	x	A	210	212	96	102	181	181	149	149	137	137	128	128	184	232	106	106	220	230	169	169	107	107	239	247	102	102	179	181
232	TNAheno20	Madagascar	-	MDG34	-18.78	47.8	2013	H. Rasolofoarivao	P0Q	A1	x	A	214	214	102	102	181	181	136	149	132	133	128	128	184	184	106	106	230	230	NA	NA	94	107	233	233	98	102	181	183
233	TNAheno21	Madagascar	-	MDG34	-18.78	47.8	2013	H. Rasolofoarivao	P0Q	A1	x	A	214	214	102	102	181	181	149	149	132	137	128	128	218	232	106	106	230	230	169	169	94	107	239	247	102	102	129	183
234	TNAheno22	Madagascar	-	MDG34	-18.78	47.8	2013	H. Rasolofoarivao	P0Q	A1	x	A	NA	NA	102	102	NA	NA	147	149	133	137	128	128	NA	NA	106	106	NA	NA	169	169	94	94	233	233	102	102	181	185
235	TNAheno23	Madagascar	-	MDG34	-18.78	47.8	2013	H. Rasolofoarivao	P0Q	A1	x	A	210	212	102	102	181	181	147	149	133	137	128	128	184	230	106	106	220	230	169	169	94	107	239	239	102	102	129	129
236	TNAheno24	Madagascar	-	MDG34	-18.78	47.8	2013	H. Rasolofoarivao	P0Q	A1	x	A	210	212	102	102	181	181	149	149	133	137	128	128	184	184	106	106	230	230	NA	NA	107	107	NA	NA	94	102	181	183
237	TNAheno25	Madagascar	-	MDG34	-18.78	47.8	2013	H. Rasolofoarivao	P0Q	A1	x	A	210	210	102	102	181	181	136	149	132	132	128	128	184	184	106	106	220	230	169	169	107	107	NA	NA	102	102	129	129
238	TNAheno26	Madagascar	-	MDG34	-18.78	47.8	2013	H. Rasolofoarivao	P0Q	A1	x	A	210	214	102	102	181	181	136	136	133	137	128	128	184	184	106	106	230	230	169	169	94	94	NA	NA	102	102	129	129
239	TNAheno27	Madagascar	-	MDG34	-18.78	47.8	2013	H. Rasolofoarivao	P0Q	A1	x	A	210	210	102	102	175	175	147	149	133	137	128	128	184	184	106	106	230	230	NA	NA	94	94	NA	NA	94	102	129	129
240	TNAheno28	Madagascar	-	MDG34	-18.78	47.8	2013	H. Rasolofoarivao	P0Q	A1	x	A	210	212	102	102	181	181	147	149	132	137	128	128	184	232	106	106	230	230	NA	NA	94	94	NA	NA	102	102	129	183
241	TNBho01	Madagascar	-	MDG35	-18.82	47.72	2013	H. Rasolofoarivao	P0Q	A1	A1_MAD3	A	210	214	96	102	181	181	147	149	133	137	128	128	NA	NA	NA	NA	NA	NA	169	169	94	94	233	239	98	102	NA	NA
242	TNBho02	Madagascar	-	MDG35	-18.82	47.72	2013	H. Rasolofoarivao	P0Q	A1	x	A	214	214	96	96	181	181	149	149	137	137	128	128	184	184	106	106	230	230	169	169	94	94	233	247	98	102	129	185
243	TNBho03	Madagascar	-	MDG35	-18.82	47.72	2013	H. Rasolofoarivao	P0Q	A1	x	A	212	212	102	102	181	181	149	149	137	137	128	128	184	184	106	106	220	234	169	169	94	107	239	247	102	102	129	177
244	TNBho04	Madagascar	-	MDG35	-18.82	47.72	2013	H. Rasolofoarivao	P0Q	A1	x	A	210	210	102	102	181	181	147	149	133	137	128	128	184	184	106	106	234	234	NA	NA	NA	NA	NA	NA	98	102	127	127
245	TNBho05	Madagascar	-	MDG35	-18.82	47.72	2013	H. Rasolofoarivao	P0Q	A1	x	A	210	212	96	102	181	181	149	149	133	137	128	128	184	184	106	106	220	230	NA	NA	94	94	NA	NA	98	102	183	183
246	TNBho06	Madagascar	-	MDG35	-18.82	47.72	2013	H. Rasolofoarivao	P0Q	A1	x	A	210	214	102	102	181	181	147	149	133	133	128	128	184	184	106	106	234	234	169	169	94	94	239	247	98	102	127	129
247	TNBho07	Madagascar	-	MDG35	-18.82	47.72	2013	H. Rasolofoarivao	P0Q	A1	x	A	NA	NA	96	102	NA	NA	149	149	137	137	128	128	184	184	106	106	220	230	NA	NA	NA	NA	NA	NA	98	102	129	183
248	TNBho08	Madagascar	-	MDG35	-18.82	47.72	2013	H. Rasolofoarivao	P0Q	A1	x	A	212	212	102	102	175	181	147	149	133	137	128	128	NA	NA	106	106	NA	NA	169	169	94	107	233	239	98	102	129	129
249	TNBho09	Madagascar	-	MDG35	-18.82	47.72	2013	H. Rasolofoarivao	P0Q	A1	x	A	212	212	102	102	181	181	136	147	133	137	128	130	184	184	106	106	230	232	169	169	94	94	NA	NA	96	102	129	129
250	TNBho10	Madagascar	-	MDG35	-18.82	47.72	2013	H. Rasolofoarivao	P0Q	A1	x	A	210	212	102	102	181	181	136	149	137	137	128	128	184	184	106	106	NA	NA	169	169	94	107	233	239	102	102	129	129
251	TNBho11	Madagascar	-	MDG35	-18.82	47.72	2013	H. Rasolofoarivao	P0Q	A1	x	A	210	212	96	102	181	181	NA	NA	132	137	NA	NA	NA	NA	NA	NA	NA	NA	169	169	94	107	247	247	98	102	129	129
252	TNBho12	Madagascar	-	MDG35	-18.82	47.72	2013	H. Rasolofoarivao	P0Q	A1	x	A	212	212	102	102	181	181	NA	NA	133	137	NA	NA	NA	NA	NA	NA	NA	NA	169	169	107	107	233	233	102	102	129	129
253	TNBho14	Madagascar	-	MDG35	-18.82	47.72	2013	H. Rasolofoarivao	P0Q	A1	x	A	212	214	102	102	181	181	136	147	132	137	128	130	184	232	106	106	226	230	169	169	94	94	233	247	102	102	129	183
254	TNBho15	Madagascar	-	MDG35	-18.82	47.72	2013	H. Rasolofoarivao	P0Q	A1	x	A	210	210	96	102	181	181	136	136	137	137	128	128	184	184	106	106	228	234	NA	NA	94	94	NA	NA	102	102	129	177
255	TNBho16	Madagascar	-	MDG35	-18.82	47.72	2013	H. Rasolofoarivao	P0Q	A1	x	A	210	210	102	102	181	181	147	149	137	137	126	128	184	184	106	106	220	228	NA	NA	94	107	NA	NA	102	102	129	181
256	TNBho17	Madagascar	-	MDG35	-18.82	47.72	2013	H. Rasolofoarivao	P0Q	A1	x	A	210	212	102	102	181	181	136	147	132	133	128	130	184	184	106	106	230	232	NA	NA	94	94	NA	NA	96	102	129	129
257	TNAnje01	Madagascar	-	MDG36	-18.84	47.7	2013	H. Rasolofoarivao	P0Q	A1	A1_MAD3	A	210	210	102	102	181	181	136	147	132	133	128	128	184	232	106	106	228	230	NA	NA	NA	NA	NA	NA	102	102	129	179
258	TNAnje02	Madagascar	-	MDG36	-18.84	47.7	2013	H. Rasolofoarivao	P0Q	A1	x	A	210	214	102	102	181	181	136	149	132	133	128	128	184	218	106	106	228	232	169	169	94	107	239	239	102	102	129	177
259	TNAnje03	Madagascar	-	MDG36	-18.84	47.7	2013	H. Rasolofoarivao	P0Q	A1	x	A	210	210	96	102	181	181	136	136	133	137	126	126	184	232	106	106	220	228	169	169	94	107	233	239	102	102	129	185
260	TNAnje04	Madagascar	-	MDG36	-18.84	47.7	2013	H. Rasolofoarivao	P0Q	A1	x	A	212	214	96	102	181	181	136	136	133	137	128	128	184	184	106	106	220	232	169	169	94	107	233	239	102	102	129	129
261	TNAnje05	Madagascar	-	MDG36	-18.84	47.7	2013	H. Rasolofoarivao	P0Q	A1	x	A	212	212	96	102	181	181	136	149	133	135	128	128	184	184	106	106	220	226	169	169	94	107	NA	NA	102	102	129	129
262	TNAnje06	Madagascar	-	MDG36	-18.84	47.7	2013	H. Rasolofoarivao	P0Q	A1	x	A	210	212	102	102	181	181	136	149	133	137	128	128	184	228	106	106	220	230	169	169	94	94	233	239	102	102	179	185
263	TNAnje07	Madagascar	-	MDG36	-18.84	47.7	2013	H. Rasolofoarivao	P0Q	A1	x	A	210	214	96	102	181	181	136	147	133	137	128	128	184	184	106	106	220	230	169	169	94	94	237	239	102	102	129	129
264	TNAnje08	Madagascar	-	MDG36	-18.84	47.7	2013	H. Rasolofoarivao	P0Q	A1	x	A	210	210	102	102	175	181	136	147	133	137	128	128	184	184	106	106	220	230	169	169	94	107	233	233	98	102	129	181
265	TNAnje09	Madagascar	-	MDG36	-18.84	47.7	2013	H. Rasolofoarivao	P0Q	A1	x	A	210	210	102	102	181	181	136	149	132	137	NA	NA	232	232	106	106	220	228	169	169	107	107	239	247	102	102	129	181
266	TNAnjex	Madagascar	-	MDG36	-18.84	47.7	2013	H. Rasolofoarivao	P0Q	A1	x	A	210	214	96	102	175	181	147	147	132	132	126	128	184	232	106	106	220	220	NA	NA	94	107	NA	NA	98	102	NA	NA
267	TNAnjey	Madagascar	-	MDG36	-18.84	47.7	2013	H. Rasolofoarivao	P0Q	A1	x	A	210	212	96	102	181	181	147	149	133	137	126	126	184	232	106	106	220	230	169	169	107	107	247	247	102	102	129	183
268	TNAnjez	Madagascar	-	MDG36	-18.84	47.7	2013	H. Rasolofoarivao	P0Q	A1	x	A	210	210	102	102	181	181	136	149	133	137	126	126	184	184	106	106	220	220	169	169	94	107	233	239	102	102	129	181
269	TNInc02	Madagascar	-	MDG37	-18.87	47.71	2013	H. Rasolofoarivao	P0Q	A1	A1_MAD3	A	210	210	102	102	175	181	147	147	133	137	NA	NA	NA	NA	106	106	220	226	NA	NA	94	107	NA	NA	94	102	129	129
270	TNInc03	Madagascar	-	MDG37	-18.87	47.71	2013	H. Rasolofoarivao	P0Q	A1	A1_MAD3	A	212	214	96	102	181	181	149	149	133	137	128	128	184	184	106	106	NA	NA	169	169	94	94	233	247	98	102	NA	NA
271	TNInc04	Madagascar	-	MDG37	-18.87	47.71	2013	H. Rasolofoarivao	P0Q	A1	x	A	212	214	102	102	175	181	147	149	133	133	128	128	184	184	106	106	230	234	NA	NA	NA	NA	NA	NA	98	102	129	185
272	TNInc05	Madagascar	-	MDG37	-18.87	47.71	2013	H. Rasolofoarivao	P0Q	A1	x	A	210	212	102	102	181	181	147	149	133	137	128	128	184	184	106	106	NA	NA	169	169	94	94	239	247	98	98	183	183
273	TNInc06	Madagascar	-	MDG37	-18.87	47.71	2013	H. Rasolofoarivao	P0Q	A1	x	A	210	210	102	102	181	181	136	149	132	137	NA	NA	NA	NA	106	106	226	234	169	169	94	94	NA	NA	102	102	129	129
274	TNInc07	Madagascar	-	MDG37	-18.87	47.71	2013	H. Rasolofoarivao	P0Q	A1	x	A	210	212	102	102	181	181	136	147	132	133	128	128	184	184	106	106	230	232	169	169	94	94	247	247	102	102	129	181
275	TNInc08	Madagascar	-	MDG37	-18.87	47.71	2013	H. Rasolofoarivao	P0Q	A1	x	A	210	212	102	102	181	181	147	149	132	137	128	128	184	184	106	106	230	234	169	169	94	94	245	247	102	102	129	129
276	TNInc09	Madagascar	-	MDG37	-18.87	47.71	2013	H. Rasolofoarivao	P0Q	A1	x	A	210	212	102	102	175	181	136	147	133	137	128	130	184	184	106	106	220	230	NA	NA	NA	NA	NA	NA	102	102	129	129
277	TNInc11	Madagascar	-	MDG37	-18.87	47.71	2013	H. Rasolofoarivao	P0Q	A1	x	A	212	214	102	102	175	181	136	149	137	137	128	128	184	232	106	106	228	230	NA	NA	NA	NA	NA	NA	98	102	183	185
278	TNInc13	Madagascar	-	MDG37	-18.87	47.71	2013	H. Rasolofoarivao	P0Q	A1	x	A	212	214	102	102	175	181	136	149	137	137	128	128	184	232	106	106	228	230	NA	NA	NA	NA	NA	NA	94	102	129	129
279	TNMka01	Madagascar	-	MDG38	-18.9	47.89	2013	H. Rasolofoarivao	P0Q	A1	A1_MAD3	A	210	210	102	102	181	185	136	136	133	133	126	128	NA	NA	106	106	NA	NA	NA	NA	94	94	NA	NA	94	94	NA	NA
280	TNMka02	Madagascar	-	MDG38	-18.9	47.89	2013	H. Rasolofoarivao	P0Q	A1	x	A	214	214	102	102	175	181	149	149	133	137	128	128	230	234	106	106	230	232	169	169	94	107	233	239	102	102	129	181
281	TNMka03	Madagascar	-	MDG38	-18.9	47.89	2013	H. Rasolofoarivao	P0Q	A1	x	A	212	214	96	102	181	181	136	147	133	133	128	128	184	184	106	106	220	230	169	169	94	94	233	247	102	102	179	181
282	TNMka04	Madagascar	-	MDG38	-18.9	47.89	2013	H. Rasolofoarivao	P0Q	A1	x	A	210	210	96	102	181	185	136	149	133	137	128	128	184	184	106	110	230	232	169	169	94	94	233	239	102	102	127	129
283	TNMka05	Madagascar	-	MDG38	-18.9	47.89	2013	H. Rasolofoarivao	P0Q	A1	x	A	210	210	96	102	181	181	147	149	137	137	128	128	184	184	106	106	220	232	169	169	94	107	233	245	98	102	129	177
284	TNMka07	Madagascar	-	MDG38	-18.9	47.89	2013	H. Rasolofoarivao	P0Q	A1	x	A	210	214	96	102	181	181	147	149	133	133	126	128	230	232	106	106	230	230	169	169	94	107	233	239	102	102	129	185
285	TNMka08	Madagascar	-	MDG38	-18.9	47.89	2013	H. Rasolofoarivao	P0Q	A1	x	A	210	214	102	102	181	181	136	149	133	133	128	128	184	184	106	106	220	230	NA	NA	94	94	NA	NA	102	102	177	179
286	TNMka09	Madagascar	-	MDG38	-18.9	47.89	2013	H. Rasolofoarivao	P0Q	A1	x	A	210	210	96	96	181	181	136	149	133	133	128	128	NA	NA	106	106	228	230	NA	NA	NA	NA	NA	NA	94	102	NA	NA
287	TNMka10	Madagascar	-	MDG38	-18.9	47.89	2013	H. Rasolofoarivao	P0Q	A1	x	A	212	214	102	102	181	181	149	149	133	137	128	128	NA	NA	106	106	230	232	169	169	94	94	233	233	102	102	129	129
288	TNMka11	Madagascar	-	MDG38	-18.9	47.89	2013	H. Rasolofoarivao	P0Q	A1	x	A	210	212	102	102	181	181	136	136	133	137	128	128	184	184	106	106	220	232	169	169	94	94	239	239	102	102	129	185
289	TNMka12	Madagascar	-	MDG38	-18.9	47.89	2013	H. Rasolofoarivao	P0Q	A1	x	A	212	212	102	102	181	183	136	149	133	133	128	128	184	184	106	106	230	232	169	169	94	107	233	247	102	102	NA	NA
290	TNMka13	Madagascar	-	MDG38	-18.9	47.89	2013	H. Rasolofoarivao	P0Q	A1	x	A	210	210	102	102	175	181	136	149	132	133	128	128	NA	NA	106	110	230	232	169	169	94	94	233	245	102	102	183	185
291	TNALA05	Madagascar	-	MDG39	-18.8	47.42	2013	H. Rasolofoarivao	P0Q	A1	x	A	210	210	102	102	181	181	147	149	137	137	128	128	NA	NA	106	106	230	230	169	169	94	94	247	247	102	102	129	183
292	TNALA06	Madagascar	-	MDG39	-18.8	47.42	2013	H. Rasolofoarivao	P0Q	A1	A1_MAD3?	A	210	212	102	102	181	181	136	136	133	137	130	130	184	184	106	106	226	232	169	169	94	107	NA	NA	96	102	129	129
293	TNALA07	Madagascar	-	MDG39	-18.8	47.42	2013	H. Rasolofoarivao	P0Q	A1	A1_MAD3?	A	212	212	102	102	181	181	136	147	132	133	128	130	184	232	106	106	226	232	169	169	94	94	233	239	102	102	NA	NA
294	TNALA01	Madagascar	-	MDG39	-18.8	47.42	2013	H. Rasolofoarivao	P0Q	A1	x	A	212	212	102	102	181	181	147	149	132	137	130	130	218	232	106	110	226	230	169	169	94	107	233	233	102	102	129	129
295	TNALA03	Madagascar	-	MDG39	-18.8	47.42	2013	H. Rasolofoarivao	P0Q	A1	x	A	NA	NA	102	102	181	181	147	147	132	137	128	128	184	184	106	106	226	230	169	169	94	94	233	247	102	102	129	129
296	TNALA04	Madagascar	-	MDG39	-18.8	47.42	2013	H. Rasolofoarivao	P0Q	A1	x	A	210	210	102	102	181	181	136	147	132	137	128	130	184	232	106	106	220	230	169	169	94	107	247	247	NA	NA	NA	NA
297	TNALA08	Madagascar	-	MDG39	-18.8	47.42	2013	H. Rasolofoarivao	P0Q	A1	x	A	210	212	102	102	181	181	136	147	133	137	128	130	184	184	106	106	230	232	169	169	94	94	239	247	96	102	129	129
298	TNALA09	Madagascar	-	MDG39	-18.8	47.42	2013	H. Rasolofoarivao	P0Q	A1	x	A	212	212	92	102	179	181	147	149	132	133	128	130	232	232	106	106	226	232	169	169	94	107	239	247	102	102	127	129
299	TNALA10	Madagascar	-	MDG39	-18.8	47.42	2013	H. Rasolofoarivao	P0Q	A1	x	A	210	212	102	102	181	181	136	149	133	137	128	128	184	232	106	106	226	232	169	169	94	94	233	239	102	102	127	129
300	TNALA11	Madagascar	-	MDG39	-18.8	47.42	2013	H. Rasolofoarivao	P0Q	A1	x	A	NA	NA	NA	NA	NA	NA	136	149	137	137	126	130	184	184	106	106	220	230	169	169	107	107	NA	NA	102	102	NA	NA
301	TNALA12	Madagascar	-	MDG39	-18.8	47.42	2013	H. Rasolofoarivao	P0Q	A1	x	A	208	208	NA	NA	NA	NA	136	136	133	137	130	130	184	232	106	106	232	234	169	169	94	107	239	247	102	102	NA	NA
302	TNALA13	Madagascar	-	MDG39	-18.8	47.42	2013	H. Rasolofoarivao	P0Q	A1	x	A	210	212	102	102	181	181	136	147	133	137	128	128	184	184	106	106	226	232	NA	NA	NA	NA	NA	NA	102	102	129	129
303	TNALA15	Madagascar	-	MDG39	-18.8	47.42	2013	H. Rasolofoarivao	P0Q	A1	x	A	210	210	102	102	181	181	147	149	137	137	126	130	184	232	106	106	220	230	169	169	107	107	NA	NA	102	102	129	181
304	TNALA16	Madagascar	-	MDG39	-18.8	47.42	2013	H. Rasolofoarivao	P0Q	A1	x	A	210	212	102	102	181	181	136	149	132	133	128	130	NA	NA	106	106	226	232	169	169	94	107	233	239	NA	NA	NA	NA
305	TNIV02	Madagascar	-	MDG40	-18.88	47.46	2013	H. Rasolofoarivao	P0Q	A1	A1_MAD3	A	210	210	102	102	175	181	136	147	132	133	128	130	184	184	106	106	220	226	169	169	94	94	233	247	102	102	129	183
306	TNIV04	Madagascar	-	MDG40	-18.88	47.46	2013	H. Rasolofoarivao	P0Q	A1	A1_MAD3	A	NA	NA	NA	NA	NA	NA	136	136	133	137	128	130	184	184	106	106	230	232	169	169	94	107	NA	NA	96	102	129	129
307	TNIV05	Madagascar	-	MDG40	-18.88	47.46	2013	H. Rasolofoarivao	P0Q	A1	A1_MAD3	A	210	212	102	102	181	181	136	149	137	137	130	130	184	232	106	106	226	234	NA	NA	NA	NA	NA	NA	102	102	129	129
308	TNIV08	Madagascar	-	MDG40	-18.88	47.46	2013	H. Rasolofoarivao	P0Q	A1	A1_MAD3	A	210	210	102	102	181	181	147	149	137	137	128	128	NA	NA	106	106	226	230	169	169	94	107	233	247	100	102	129	183
309	TNIV09	Madagascar	-	MDG40	-18.88	47.46	2013	H. Rasolofoarivao	P0Q	A1	A1_MAD3	A	210	212	102	102	181	181	147	149	137	137	126	130	184	184	106	106	220	226	169	169	108	108	233	247	100	102	129	181
310	TNIV10	Madagascar	-	MDG40	-18.88	47.46	2013	H. Rasolofoarivao	P0Q	A1	A1_MAD3	A	210	212	102	102	181	181	136	136	132	133	128	130	184	184	106	106	230	232	169	169	94	107	233	239	96	102	129	129
311	TNIV11	Madagascar	-	MDG40	-18.88	47.46	2013	H. Rasolofoarivao	P0Q	A1	A1_MAD3	A	210	212	102	102	181	181	136	136	133	137	128	130	184	184	106	106	230	232	169	169	94	94	239	247	96	102	129	129
312	TNIV13	Madagascar	-	MDG40	-18.88	47.46	2013	H. Rasolofoarivao	P0Q	A1	A1_MAD3?	A	NA	NA	NA	NA	NA	NA	147	147	137	137	128	128	184	184	106	106	230	230	169	169	94	94	233	247	102	102	129	183
313	TNIV23	Madagascar	-	MDG40	-18.88	47.46	2013	H. Rasolofoarivao	P0Q	A1	A1_MAD3?	A	210	212	102	102	181	181	136	149	137	137	128	128	184	184	106	106	226	230	169	169	94	107	247	247	102	102	129	183
314	TNIV24	Madagascar	-	MDG40	-18.88	47.46	2013	H. Rasolofoarivao	P0Q	A1	A1_MAD3?	A	210	210	96	102	181	181	147	147	137	137	128	128	230	232	106	106	226	230	169	169	94	94	247	247	98	102	129	129
315	TNIV03	Madagascar	-	MDG40	-18.88	47.46	2013	H. Rasolofoarivao	P0Q	A1	x	A	210	210	102	102	181	181	136	147	132	137	128	128	184	184	106	106	230	230	NA	NA	NA	NA	NA	NA	102	102	129	181
316	TNIV06	Madagascar	-	MDG40	-18.88	47.46	2013	H. Rasolofoarivao	P0Q	A1	x	A	210	212	102	102	181	181	136	147	137	137	128	130	184	232	106	106	226	230	169	169	94	107	233	247	102	102	129	129
317	TNIV07	Madagascar	-	MDG40	-18.88	47.46	2013	H. Rasolofoarivao	P0Q	A1	x	A	210	212	102	102	181	181	136	149	132	133	128	128	184	232	106	110	230	232	169	169	84	94	239	247	102	102	127	129
318	TNIV12	Madagascar	-	MDG40	-18.88	47.46	2013	H. Rasolofoarivao	P0Q	A1	x	A	212	212	102	102	181	181	136	147	133	137	130	130	184	184	106	106	226	232	169	169	94	107	233	239	96	102	129	129
319	TNIV15	Madagascar	-	MDG40	-18.88	47.46	2013	H. Rasolofoarivao	P0Q	A1	x	A	212	212	102	102	181	181	136	147	132	137	128	128	184	184	106	106	230	230	NA	NA	NA	NA	NA	NA	102	102	129	183
320	TNIV16	Madagascar	-	MDG40	-18.88	47.46	2013	H. Rasolofoarivao	P0Q	A1	x	A	210	210	102	102	181	181	136	147	137	137	128	128	184	184	106	106	220	230	169	169	94	94	247	247	100	100	129	129
321	TNIV17	Madagascar	-	MDG40	-18.88	47.46	2013	H. Rasolofoarivao	P0Q	A1	x	A	210	210	102	102	181	181	147	149	137	137	126	130	184	232	106	106	220	226	169	169	94	107	233	247	102	102	129	181
322	TNIV18	Madagascar	-	MDG40	-18.88	47.46	2013	H. Rasolofoarivao	P0Q	A1	x	A	210	212	96	102	181	181	136	147	137	137	NA	NA	NA	NA	106	106	NA	NA	169	169	94	107	NA	NA	98	102	129	129
323	TNIV25	Madagascar	-	MDG40	-18.88	47.46	2013	H. Rasolofoarivao	P0Q	A1	x	A	210	212	NA	NA	181	181	136	136	133	137	128	130	184	184	106	106	228	230	169	169	107	107	233	233	102	102	129	185
324	TNIV26	Madagascar	-	MDG40	-18.88	47.46	2013	H. Rasolofoarivao	P0Q	A1	x	A	210	214	100	100	175	181	136	147	137	137	128	128	184	184	106	106	222	228	167	169	112	112	247	247	NA	NA	NA	NA
325	TNCp01	Madagascar	-	MDG41	-18.91	47.55	2013	H. Rasolofoarivao	P0Q	A1	A1_MAD3	A	212	212	NA	NA	181	181	147	149	137	137	128	130	184	218	106	110	230	230	169	169	94	107	NA	NA	102	102	129	129
326	TNCp02	Madagascar	-	MDG41	-18.91	47.55	2013	H. Rasolofoarivao	P0Q	A1	A1_MAD3	A	210	210	102	102	175	181	136	147	133	137	128	128	184	184	106	106	220	226	169	169	94	107	NA	NA	102	102	129	129
327	TNAsina01	Madagascar	-	MDG42	-19.18	47.6	2013	H. Rasolofoarivao	P0Q	A1	A1_MAD3	A	212	214	102	102	181	181	136	149	133	137	128	128	184	184	106	106	230	230	169	169	94	94	239	247	102	102	129	181
328	TNAsina02	Madagascar	-	MDG42	-19.18	47.6	2013	H. Rasolofoarivao	P0Q	A1	A1_MAD3	A	212	212	92	102	175	181	147	147	133	133	128	128	184	184	106	106	228	230	169	169	94	107	233	239	102	102	129	179
329	TNAsina03	Madagascar	-	MDG42	-19.18	47.6	2013	H. Rasolofoarivao	P0Q	A1	A1_MAD3	A	212	214	96	102	181	181	136	149	137	137	128	128	184	188	106	106	220	230	169	169	94	107	233	239	102	102	129	179
330	TNAsina04	Madagascar	-	MDG42	-19.18	47.6	2013	H. Rasolofoarivao	P0Q	A1	x	A	210	210	102	102	181	181	149	149	132	133	128	128	184	184	106	106	230	232	NA	NA	94	94	NA	NA	98	102	129	179
331	TNAsina05	Madagascar	-	MDG42	-19.18	47.6	2013	H. Rasolofoarivao	P0Q	A1	x	A	210	210	102	102	181	181	149	149	132	133	128	128	NA	NA	106	106	230	230	169	169	107	107	233	239	102	102	183	185
332	TNAsina06	Madagascar	-	MDG42	-19.18	47.6	2013	H. Rasolofoarivao	P0Q	A1	x	A	210	212	96	102	181	181	149	149	132	133	128	128	NA	NA	106	110	226	228	169	169	94	107	239	239	98	102	179	181
333	TNAsina08	Madagascar	-	MDG42	-19.18	47.6	2013	H. Rasolofoarivao	P0Q	A1	x	A	210	212	102	102	175	181	147	149	133	133	128	128	NA	NA	106	106	NA	NA	169	169	107	107	233	233	102	102	NA	NA
334	TNAsina09	Madagascar	-	MDG42	-19.18	47.6	2013	H. Rasolofoarivao	P0Q	A1	x	A	210	210	96	102	181	181	136	136	133	137	128	128	184	184	106	106	220	232	169	169	94	94	237	237	98	102	129	129
335	TNAsina10	Madagascar	-	MDG42	-19.18	47.6	2013	H. Rasolofoarivao	P0Q	A1	x	A	212	214	96	102	175	181	147	149	133	133	128	128	184	184	106	106	230	232	169	169	94	94	NA	NA	96	102	129	129
336	It01	Madagascar	-	MDG43	-19.03	46.8	2011	H. Rasolofoarivao	P0Q	A1	A1_MAD3	A	210	212	96	102	175	181	136	147	133	137	128	128	228	232	106	106	220	230	169	169	94	94	237	247	102	102	129	129
337	It02	Madagascar	-	MDG43	-19.03	46.8	2011	H. Rasolofoarivao	P0Q	A1	A1_MAD3	A	210	214	102	102	181	181	136	147	132	133	128	128	230	232	106	106	220	220	169	169	107	107	233	233	102	102	129	129
338	It03	Madagascar	-	MDG43	-19.03	46.8	2011	H. Rasolofoarivao	P0Q	A1	A1_MAD3	A	212	214	96	102	181	181	147	147	137	137	128	128	184	184	106	106	232	232	169	169	94	107	233	235	102	102	129	129
339	It31	Madagascar	-	MDG43	-19.03	46.8	2011	H. Rasolofoarivao	P0Q	A1	A1_MAD3	A	210	214	102	102	175	181	147	149	133	137	128	128	184	232	106	106	220	220	169	169	94	107	233	233	98	102	129	181
340	It04	Madagascar	-	MDG43	-19.03	46.8	2011	H. Rasolofoarivao	P0Q	A1	x	A	210	214	102	102	181	181	147	149	133	133	128	128	184	228	106	106	230	232	169	169	94	94	233	233	98	102	129	187
341	It05	Madagascar	-	MDG43	-19.03	46.8	2011	H. Rasolofoarivao	P0Q	A1	x	A	210	212	102	102	175	181	147	147	133	137	128	128	184	234	106	106	220	230	169	169	94	107	233	235	102	102	129	181
342	It06	Madagascar	-	MDG43	-19.03	46.8	2011	H. Rasolofoarivao	P0Q	A1	x	A	210	210	96	102	181	181	136	149	133	137	128	128	184	228	106	106	230	232	169	169	94	107	233	233	102	102	129	185
343	It07	Madagascar	-	MDG43	-19.03	46.8	2011	H. Rasolofoarivao	P0Q	A1	x	A	210	212	102	102	175	181	147	149	133	137	128	128	184	232	106	106	220	230	169	169	94	94	235	245	102	102	129	181
344	It08	Madagascar	-	MDG43	-19.03	46.8	2011	H. Rasolofoarivao	P0Q	A1	x	A	210	212	102	102	181	181	149	149	137	137	128	128	232	234	106	106	220	230	169	169	94	107	233	235	102	102	129	181
345	It09	Madagascar	-	MDG43	-19.03	46.8	2011	H. Rasolofoarivao	P0Q	A1	x	A	210	214	102	102	181	181	136	147	133	137	128	128	184	184	106	106	230	230	NA	NA	NA	NA	NA	NA	102	102	129	129
346	It10	Madagascar	-	MDG43	-19.03	46.8	2011	H. Rasolofoarivao	P0Q	A1	x	A	212	214	102	102	175	181	136	147	133	133	128	128	184	184	106	106	230	230	169	169	94	94	233	233	98	102	129	129
347	It11	Madagascar	-	MDG43	-19.03	46.8	2011	H. Rasolofoarivao	P0Q	A1	x	A	210	214	96	102	181	181	136	147	132	137	128	128	184	184	106	106	230	230	169	169	94	94	233	239	102	102	129	129
348	It12	Madagascar	-	MDG43	-19.03	46.8	2011	H. Rasolofoarivao	P0Q	A1	x	A	214	214	102	102	181	181	147	149	133	137	128	128	184	184	106	106	220	232	169	169	94	94	233	239	102	102	129	129
349	It13	Madagascar	-	MDG43	-19.03	46.8	2011	H. Rasolofoarivao	P0Q	A1	x	A	212	212	102	102	181	181	136	149	133	133	128	128	228	232	106	106	220	220	169	169	94	94	233	247	102	102	129	129
350	It14	Madagascar	-	MDG43	-19.03	46.8	2011	H. Rasolofoarivao	P0Q	A1	x	A	210	212	96	102	175	181	149	149	133	137	128	128	228	234	106	106	220	232	169	169	94	94	233	233	102	102	187	187
351	It15	Madagascar	-	MDG43	-19.03	46.8	2011	H. Rasolofoarivao	P0Q	A1	x	A	210	212	96	102	181	181	149	149	132	137	128	128	184	184	106	106	220	232	169	169	94	107	233	233	102	102	129	129
352	It16	Madagascar	-	MDG43	-19.03	46.8	2011	H. Rasolofoarivao	P0Q	A1	x	A	210	210	102	102	175	175	136	149	137	137	128	128	184	184	106	106	230	230	169	169	94	94	233	239	102	102	129	129
353	It17	Madagascar	-	MDG43	-19.03	46.8	2011	H. Rasolofoarivao	P0Q	A1	x	A	210	212	96	96	179	181	136	149	133	137	128	128	184	184	106	106	230	232	169	169	94	94	245	247	102	102	129	183
354	It18	Madagascar	-	MDG43	-19.03	46.8	2011	H. Rasolofoarivao	P0Q	A1	x	A	212	212	96	102	181	181	149	149	133	133	128	128	184	228	106	106	230	232	NA	NA	NA	NA	NA	NA	NA	NA	129	129
355	It19	Madagascar	-	MDG43	-19.03	46.8	2011	H. Rasolofoarivao	P0Q	A1	x	A	210	214	92	102	181	185	147	149	133	137	128	128	184	232	106	106	230	230	169	169	94	94	233	235	102	102	129	129
356	It20	Madagascar	-	MDG43	-19.03	46.8	2011	H. Rasolofoarivao	P0Q	A1	x	A	214	214	102	102	181	181	149	149	133	137	128	128	184	184	106	106	230	232	169	169	94	107	233	239	98	102	187	187
357	It21	Madagascar	-	MDG43	-19.03	46.8	2011	H. Rasolofoarivao	P0Q	A1	x	A	210	214	102	102	175	175	147	149	133	133	128	128	184	184	106	106	220	230	NA	NA	94	94	233	233	102	102	129	187
358	It22	Madagascar	-	MDG43	-19.03	46.8	2011	H. Rasolofoarivao	P0Q	A1	x	A	210	214	96	102	181	181	149	149	133	133	NA	NA	184	184	106	106	230	230	169	169	94	94	233	239	102	102	129	183
359	It23	Madagascar	-	MDG43	-19.03	46.8	2011	H. Rasolofoarivao	P0Q	A1	x	A	210	214	96	102	175	181	147	149	133	137	128	128	184	184	106	106	220	230	NA	NA	94	94	233	237	102	102	181	187
360	It24	Madagascar	-	MDG43	-19.03	46.8	2011	H. Rasolofoarivao	P0Q	A1	x	A	212	214	102	102	181	185	149	149	133	133	128	128	184	184	106	106	220	220	169	169	107	107	233	233	102	102	129	187
361	It25	Madagascar	-	MDG43	-19.03	46.8	2011	H. Rasolofoarivao	P0Q	A1	x	A	212	212	102	102	181	185	136	149	137	137	128	128	218	232	106	106	220	230	169	169	94	94	245	247	102	102	129	129
362	It26	Madagascar	-	MDG43	-19.03	46.8	2011	H. Rasolofoarivao	P0Q	A1	x	A	210	210	96	96	181	181	147	149	133	133	128	128	184	228	106	106	220	232	169	169	94	94	233	233	102	102	129	187
363	It27	Madagascar	-	MDG43	-19.03	46.8	2011	H. Rasolofoarivao	P0Q	A1	x	A	212	212	96	96	181	181	136	147	137	137	128	128	184	218	106	106	230	232	169	169	94	94	233	233	102	102	129	129
364	It28	Madagascar	-	MDG43	-19.03	46.8	2011	H. Rasolofoarivao	P0Q	A1	x	A	210	210	102	102	181	181	147	149	132	137	128	128	184	232	106	106	220	230	169	169	94	107	233	233	96	102	129	181
365	It29	Madagascar	-	MDG43	-19.03	46.8	2011	H. Rasolofoarivao	P0Q	A1	x	A	210	212	102	102	181	181	136	149	132	137	128	128	228	232	106	106	220	230	169	169	94	94	233	233	102	102	129	181
366	It30	Madagascar	-	MDG43	-19.03	46.8	2011	H. Rasolofoarivao	P0Q	A1	x	A	214	214	102	102	175	185	149	149	133	137	128	128	NA	NA	106	106	NA	NA	169	169	94	94	233	245	102	102	129	183
367	It32	Madagascar	-	MDG43	-19.03	46.8	2011	H. Rasolofoarivao	P0Q	A1	x	A	210	210	102	102	175	181	147	147	133	133	128	128	184	228	106	106	220	232	169	169	94	94	233	233	102	102	129	187
368	Tdidy01	Madagascar	-	MDG44	-18.77	46.05	2013	H. Rasolofoarivao	P0Q	A1	A1_MAD3	A	210	210	102	102	181	181	149	149	137	137	128	128	NA	NA	106	106	NA	NA	169	169	94	107	NA	NA	102	102	129	129
369	Tdidy02	Madagascar	-	MDG44	-18.77	46.05	2013	H. Rasolofoarivao	P0Q	A1	A1_MAD14	A	210	214	96	102	181	181	136	147	137	137	128	128	NA	NA	106	106	232	232	169	169	94	94	237	237	102	102	129	129
370	Tdidy03	Madagascar	-	MDG44	-18.77	46.05	2013	H. Rasolofoarivao	P0Q	A1	A1_MAD3	A	210	214	96	102	175	181	136	136	137	137	128	128	184	184	106	106	220	220	169	169	94	107	233	233	102	102	129	129
371	Tdidy04	Madagascar	-	MDG44	-18.77	46.05	2013	H. Rasolofoarivao	P0Q	A1	x	A	210	212	96	102	175	181	136	149	133	133	128	128	184	184	106	106	228	228	169	169	94	94	233	233	102	102	129	183
372	Tdidy05	Madagascar	-	MDG44	-18.77	46.05	2013	H. Rasolofoarivao	P0Q	A1	x	A	210	212	96	96	181	181	136	147	137	137	128	128	184	184	106	106	NA	NA	169	169	94	107	NA	NA	102	102	NA	NA
373	Tdidy06	Madagascar	-	MDG44	-18.77	46.05	2013	H. Rasolofoarivao	P0Q	A1	x	A	212	214	102	102	181	181	136	136	137	137	128	128	NA	NA	106	106	220	230	169	169	94	107	233	233	102	102	129	129
374	Vk052	Madagascar	-	MDG45	-19.37	47.43	2011	H. Rasolofoarivao	P0Q	A1	A1_MAD3	A	210	212	102	102	181	181	136	149	137	137	130	130	226	228	106	106	230	230	169	169	107	107	233	233	102	102	129	181
375	Vk053	Madagascar	-	MDG45	-19.37	47.43	2011	H. Rasolofoarivao	P0Q	A1	A1_MAD3	A	210	212	102	102	181	181	136	147	132	137	128	128	184	232	106	106	220	230	169	169	94	107	233	245	98	102	129	181
376	Vk050	Madagascar	-	MDG45	-19.37	47.43	2011	H. Rasolofoarivao	P0Q	A1	x	A	210	212	102	102	175	181	147	147	133	133	128	128	184	184	106	106	220	230	169	169	94	94	233	247	102	102	127	179
377	Vk051	Madagascar	-	MDG45	-19.37	47.43	2011	H. Rasolofoarivao	P0Q	A1	x	A	210	210	102	102	181	181	147	149	133	133	128	128	184	184	106	106	220	230	169	169	94	94	233	247	98	102	179	183
378	Vk054	Madagascar	-	MDG45	-19.37	47.43	2011	H. Rasolofoarivao	P0Q	A1	x	A	210	214	96	102	181	181	149	149	132	137	128	128	184	184	106	106	220	232	169	169	94	107	233	245	102	102	181	187
379	Vk055	Madagascar	-	MDG45	-19.37	47.43	2011	H. Rasolofoarivao	P0Q	A1	x	A	210	210	96	102	181	181	149	149	133	133	128	130	184	228	106	106	230	230	169	169	94	107	233	247	102	102	127	129
380	Vk056	Madagascar	-	MDG45	-19.37	47.43	2011	H. Rasolofoarivao	P0Q	A1	x	A	210	210	102	102	181	181	147	149	133	137	128	130	NA	NA	106	106	NA	NA	169	169	94	107	NA	NA	98	102	129	129
381	Vk057	Madagascar	-	MDG45	-19.37	47.43	2011	H. Rasolofoarivao	P0Q	A1	x	A	210	212	102	102	NA	NA	136	149	133	137	128	130	184	232	106	106	230	230	169	169	94	94	233	239	102	102	129	187
382	Vk058	Madagascar	-	MDG45	-19.37	47.43	2011	H. Rasolofoarivao	P0Q	A1	x	A	210	210	102	102	181	181	147	149	133	133	128	128	184	234	106	106	230	232	169	169	94	107	NA	NA	102	102	NA	NA
383	Vk043	Madagascar	-	MDG46	-19.38	47.46	2011	H. Rasolofoarivao	P0Q	A1	x	A	210	210	102	102	175	181	136	149	133	133	128	128	184	230	106	106	220	220	169	169	107	107	233	233	102	102	129	177
384	Vk044	Madagascar	-	MDG46	-19.38	47.46	2011	H. Rasolofoarivao	P0Q	A1	x	A	210	210	102	102	181	181	147	149	133	137	128	128	230	232	106	106	220	230	169	169	94	107	233	239	102	102	127	177
385	Vk045	Madagascar	-	MDG46	-19.38	47.46	2011	H. Rasolofoarivao	P0Q	A1	x	A	212	212	96	102	175	181	149	149	133	137	128	128	184	232	106	106	230	234	169	169	94	107	233	245	102	102	129	129
386	Vk046	Madagascar	-	MDG46	-19.38	47.46	2011	H. Rasolofoarivao	P0Q	A1	x	A	210	210	102	102	177	181	149	149	133	137	128	128	194	228	106	106	220	228	169	169	94	107	233	233	102	102	179	181
387	Vk047	Madagascar	-	MDG46	-19.38	47.46	2011	H. Rasolofoarivao	P0Q	A1	x	A	210	212	96	102	181	181	149	149	133	137	128	130	184	194	106	106	220	230	169	169	94	107	239	239	102	102	129	177
388	Vk048	Madagascar	-	MDG46	-19.38	47.46	2011	H. Rasolofoarivao	P0Q	A1	x	A	210	212	96	96	181	181	147	149	133	133	128	128	184	232	106	106	220	232	169	169	94	107	233	247	102	102	129	129
389	Vk049	Madagascar	-	MDG46	-19.38	47.46	2011	H. Rasolofoarivao	P0Q	A1	x	A	210	210	96	102	175	181	149	149	133	137	128	128	184	184	106	106	228	230	169	169	94	107	231	233	102	102	127	181
390	Vk030	Madagascar	-	MDG47	-19.45	47.42	2011	H. Rasolofoarivao	P0Q	A1	x	A	210	214	102	102	181	181	136	149	133	133	128	128	184	230	106	106	230	230	169	169	94	107	233	233	98	102	129	181
391	Vk031	Madagascar	-	MDG47	-19.45	47.42	2011	H. Rasolofoarivao	P0Q	A1	x	A	210	214	102	102	181	181	149	149	133	137	128	128	232	234	106	106	220	220	169	169	94	94	233	247	102	102	127	181
392	Vk032	Madagascar	-	MDG47	-19.45	47.42	2011	H. Rasolofoarivao	P0Q	A1	x	A	212	214	102	102	181	181	136	136	133	137	128	130	184	184	106	106	220	230	169	169	94	107	233	233	98	102	179	181
393	Vk033	Madagascar	-	MDG47	-19.45	47.42	2011	H. Rasolofoarivao	P0Q	A1	x	A	210	210	102	102	181	181	147	149	133	137	128	128	184	184	106	106	220	230	169	169	94	107	233	245	102	102	129	129
394	Vk034	Madagascar	-	MDG47	-19.45	47.42	2011	H. Rasolofoarivao	P0Q	A1	x	A	210	214	102	102	181	185	147	149	133	137	128	128	184	240	106	106	220	230	169	169	107	107	233	245	102	102	129	181
395	Vk035	Madagascar	-	MDG47	-19.45	47.42	2011	H. Rasolofoarivao	P0Q	A1	x	A	210	212	102	102	175	183	149	149	133	133	130	130	184	232	106	106	228	230	169	169	94	94	NA	NA	98	102	179	181
396	Vk036	Madagascar	-	MDG47	-19.45	47.42	2011	H. Rasolofoarivao	P0Q	A1	x	A	210	210	102	102	175	181	149	149	132	133	128	130	184	230	106	106	220	230	169	169	94	94	239	249	102	102	129	183
397	Vk037	Madagascar	-	MDG47	-19.45	47.42	2011	H. Rasolofoarivao	P0Q	A1	x	A	210	212	102	102	181	181	149	149	133	133	128	128	228	232	106	106	220	228	169	169	94	107	233	249	102	102	129	181
398	Vk038	Madagascar	-	MDG47	-19.45	47.42	2011	H. Rasolofoarivao	P0Q	A1	x	A	210	214	96	102	181	181	149	149	137	137	128	128	184	230	106	106	230	230	169	169	107	107	233	239	98	98	129	129
399	Vk040	Madagascar	-	MDG47	-19.45	47.42	2011	H. Rasolofoarivao	P0Q	A1	x	A	210	214	102	102	181	181	149	149	133	133	128	128	184	230	106	106	230	232	169	169	94	107	231	233	102	102	129	183
400	Vk041	Madagascar	-	MDG47	-19.45	47.42	2011	H. Rasolofoarivao	P0Q	A1	x	A	210	212	102	102	181	181	147	149	133	133	128	128	184	236	106	106	220	220	169	169	107	107	233	239	102	102	183	185
401	Vk042	Madagascar	-	MDG47	-19.45	47.42	2011	H. Rasolofoarivao	P0Q	A1	x	A	210	210	102	102	181	181	136	147	133	137	126	128	184	228	106	106	230	230	169	169	94	107	233	239	102	102	129	179
402	Vk016	Madagascar	-	MDG48	-19.76	46.89	2011	H. Rasolofoarivao	P0Q	A1	A1_MAD3	A	210	210	96	102	181	181	147	149	133	137	128	128	228	232	106	106	228	230	169	169	94	107	233	239	98	102	129	179
403	Vk017	Madagascar	-	MDG48	-19.76	46.89	2011	H. Rasolofoarivao	P0Q	A1	A1_MAD3	A	210	212	102	102	181	181	147	149	133	137	128	128	184	184	106	106	220	228	169	169	107	107	235	239	102	102	129	129
404	Vk013	Madagascar	-	MDG48	-19.76	46.89	2011	H. Rasolofoarivao	P0Q	A1	x	A	210	214	102	102	181	181	147	149	133	133	128	128	226	236	106	106	230	230	169	169	94	94	239	247	102	102	129	191
405	Vk014	Madagascar	-	MDG48	-19.76	46.89	2011	H. Rasolofoarivao	P0Q	A1	x	A	210	214	98	102	175	181	147	147	133	133	128	128	184	230	106	106	220	230	169	169	94	107	239	239	102	102	181	181
406	Vk015	Madagascar	-	MDG48	-19.76	46.89	2011	H. Rasolofoarivao	P0Q	A1	x	A	210	214	96	102	181	181	136	149	132	133	128	128	184	232	106	106	220	220	169	169	94	107	NA	NA	102	102	129	129
407	Vk018	Madagascar	-	MDG48	-19.76	46.89	2011	H. Rasolofoarivao	P0Q	A1	x	A	210	214	102	102	175	181	147	149	133	137	128	128	184	184	106	106	220	230	169	169	94	94	233	239	102	102	127	181
408	Vk019	Madagascar	-	MDG48	-19.76	46.89	2011	H. Rasolofoarivao	P0Q	A1	x	A	210	210	96	102	181	181	147	149	133	137	128	128	228	232	106	110	230	232	169	169	94	107	233	239	98	102	129	179
409	Vk001	Madagascar	-	MDG49	-19.77	46.84	2011	H. Rasolofoarivao	P0Q	A1	A1_MAD3	A	210	214	102	102	181	181	136	149	133	133	128	128	184	184	106	106	220	232	169	169	94	94	233	233	102	102	127	181
410	Vk002	Madagascar	-	MDG49	-19.77	46.84	2011	H. Rasolofoarivao	P0Q	A1	A1_MAD3	A	NA	NA	100	102	NA	NA	136	149	133	137	128	128	184	230	106	106	230	232	169	169	94	107	233	245	98	102	129	129
411	Vk003	Madagascar	-	MDG49	-19.77	46.84	2011	H. Rasolofoarivao	P0Q	A1	A1_MAD3	A	214	214	102	102	181	181	147	147	133	137	128	128	184	184	106	106	232	234	169	169	94	94	235	239	102	102	181	181
412	Vk004	Madagascar	-	MDG49	-19.77	46.84	2011	H. Rasolofoarivao	P0Q	A1	x	A	212	214	96	102	181	181	147	149	133	137	128	128	184	184	106	106	220	228	NA	NA	NA	NA	NA	NA	NA	NA	NA	NA
413	Vk006	Madagascar	-	MDG49	-19.77	46.84	2011	H. Rasolofoarivao	P0Q	A1	x	A	210	214	102	102	181	181	147	149	137	137	128	128	184	230	106	106	230	230	169	169	94	107	233	239	102	102	129	129
414	Vk007	Madagascar	-	MDG49	-19.77	46.84	2011	H. Rasolofoarivao	P0Q	A1	x	A	212	214	102	102	181	181	149	149	133	137	128	128	184	234	106	106	230	230	169	169	94	94	233	239	94	102	181	181
415	Vk008	Madagascar	-	MDG49	-19.77	46.84	2011	H. Rasolofoarivao	P0Q	A1	x	A	210	210	96	102	181	181	147	149	133	137	124	124	184	184	106	106	228	228	169	169	94	107	233	233	98	102	129	183
416	Vk009	Madagascar	-	MDG49	-19.77	46.84	2011	H. Rasolofoarivao	P0Q	A1	x	A	210	214	102	102	181	181	147	149	133	137	128	128	184	236	106	106	220	232	169	169	94	107	221	233	102	102	129	181
417	Vk010	Madagascar	-	MDG49	-19.77	46.84	2011	H. Rasolofoarivao	P0Q	A1	x	A	210	214	102	102	181	181	136	136	133	137	128	128	184	184	106	106	228	230	169	169	94	107	239	247	102	102	127	127
418	Vk011	Madagascar	-	MDG49	-19.77	46.84	2011	H. Rasolofoarivao	P0Q	A1	x	A	210	214	102	102	181	181	136	147	133	137	128	128	184	184	106	106	220	230	169	169	94	107	237	239	98	102	127	129
419	Vk012	Madagascar	-	MDG49	-19.77	46.84	2011	H. Rasolofoarivao	P0Q	A1	x	A	212	214	102	102	181	181	136	149	133	137	128	128	184	184	106	106	220	230	169	169	94	107	239	239	98	102	127	183
420	Vk023	Madagascar	-	MDG50	-19.88	47.04	2011	H. Rasolofoarivao	P0Q	A1	A1_MAD3	A	210	210	102	102	181	181	136	149	133	133	128	128	194	232	106	106	220	220	169	169	94	107	233	249	102	102	127	129
421	Vk024	Madagascar	-	MDG50	-19.88	47.04	2011	H. Rasolofoarivao	P0Q	A1	A1_MAD3	A	210	212	102	102	181	181	136	149	133	137	128	128	NA	NA	106	106	220	230	169	169	94	94	NA	NA	102	102	NA	NA
422	Vk025	Madagascar	-	MDG50	-19.88	47.04	2011	H. Rasolofoarivao	P0Q	A1	A1_MAD3	A	212	212	102	102	181	181	147	149	137	137	128	128	184	188	106	106	220	220	169	169	94	94	233	245	102	102	181	183
423	Vk020	Madagascar	-	MDG50	-19.88	47.04	2011	H. Rasolofoarivao	P0Q	A1	x	A	210	214	102	102	181	183	136	147	133	137	128	128	194	232	106	106	220	220	169	169	94	94	NA	NA	102	102	129	129
424	Vk021	Madagascar	-	MDG50	-19.88	47.04	2011	H. Rasolofoarivao	P0Q	A1	x	A	210	212	102	102	181	181	136	149	133	137	128	130	194	232	106	106	220	230	169	169	94	94	233	247	102	102	129	187
425	Vk022	Madagascar	-	MDG50	-19.88	47.04	2011	H. Rasolofoarivao	P0Q	A1	x	A	210	210	102	102	181	181	136	136	133	133	128	128	228	232	106	106	220	220	169	169	94	107	233	233	102	102	127	129
426	Vk026	Madagascar	-	MDG50	-19.88	47.04	2011	H. Rasolofoarivao	P0Q	A1	x	A	210	214	102	102	181	181	136	149	133	133	128	128	226	232	106	106	220	228	169	169	94	107	233	233	102	102	129	181
427	Vk027	Madagascar	-	MDG50	-19.88	47.04	2011	H. Rasolofoarivao	P0Q	A1	x	A	212	212	102	102	181	181	147	149	137	137	128	128	NA	NA	106	106	NA	NA	169	169	94	94	NA	NA	94	102	129	187
428	Vk028	Madagascar	-	MDG50	-19.88	47.04	2011	H. Rasolofoarivao	P0Q	A1	x	A	210	214	102	102	175	181	149	149	132	133	128	128	230	232	106	106	220	220	169	169	94	94	239	247	102	102	127	129
429	Vk029	Madagascar	-	MDG50	-19.88	47.04	2011	H. Rasolofoarivao	P0Q	A1	x	A	210	214	96	102	181	181	136	149	133	137	128	128	184	184	106	106	220	220	169	169	94	94	233	233	102	102	179	185
430	VK112	Madagascar	-	MDG51	-19.86	47.03	2011	H. Rasolofoarivao	P0Q	A1	x	A	210	210	102	102	181	181	149	149	133	137	130	130	184	232	106	106	228	230	NA	NA	NA	NA	NA	NA	NA	NA	NA	NA
431	VK116	Madagascar	-	MDG51	-19.86	47.03	2011	H. Rasolofoarivao	P0Q	A1	x	A	212	212	102	102	175	181	136	147	133	133	128	128	184	184	106	106	220	220	NA	NA	NA	NA	NA	NA	NA	NA	NA	NA
432	VK118	Madagascar	-	MDG51	-19.86	47.03	2011	H. Rasolofoarivao	P0Q	A1	x	A	210	210	92	102	175	181	136	136	133	133	128	130	NA	NA	106	106	220	230	169	169	94	94	233	233	NA	NA	NA	NA
433	VK119	Madagascar	-	MDG51	-19.86	47.03	2011	H. Rasolofoarivao	P0Q	A1	x	A	210	210	96	102	181	181	149	149	133	137	126	128	228	228	106	106	220	230	NA	NA	NA	NA	NA	NA	NA	NA	NA	NA
434	Abos087	Madagascar	-	MDG52	-20.18	47.75	2011	H. Rasolofoarivao	P0Q	A1	x	A	NA	NA	96	102	181	181	149	149	133	137	NA	NA	NA	NA	106	106	NA	NA	169	169	94	107	233	235	98	102	129	129
435	Abos088	Madagascar	-	MDG52	-20.18	47.75	2011	H. Rasolofoarivao	P0Q	A1	x	A	210	214	102	102	181	181	147	149	133	133	NA	NA	NA	NA	106	106	220	220	169	169	94	94	237	239	102	102	129	129
436	Abos100	Madagascar	-	MDG52	-20.18	47.75	2011	H. Rasolofoarivao	P0Q	A1	x	A	NA	NA	NA	NA	NA	NA	149	149	133	137	128	128	184	232	106	106	220	230	169	169	94	107	233	239	NA	NA	NA	NA
437	Abos101	Madagascar	-	MDG52	-20.18	47.75	2011	H. Rasolofoarivao	P0Q	A1	x	A	210	212	102	102	181	181	136	149	133	137	128	128	184	230	106	106	230	230	169	169	94	94	233	237	NA	NA	NA	NA
438	Abos102	Madagascar	-	MDG52	-20.18	47.75	2011	H. Rasolofoarivao	P0Q	A1	x	A	210	212	96	102	181	181	136	149	133	133	128	128	184	184	106	106	230	232	169	169	94	107	233	233	NA	NA	NA	NA
439	Abos104	Madagascar	-	MDG52	-20.18	47.75	2011	H. Rasolofoarivao	P0Q	A1	x	A	212	212	102	102	181	181	147	147	132	137	128	128	184	232	106	106	220	230	169	169	94	94	233	249	NA	NA	NA	NA
440	Abos105	Madagascar	-	MDG52	-20.18	47.75	2011	H. Rasolofoarivao	P0Q	A1	x	A	212	214	96	102	181	181	147	149	137	137	130	130	184	224	106	106	220	230	169	169	94	107	237	239	NA	NA	NA	NA
441	Abos106	Madagascar	-	MDG52	-20.18	47.75	2011	H. Rasolofoarivao	P0Q	A1	x	A	NA	NA	96	102	NA	NA	136	147	132	137	128	128	184	184	106	106	230	230	169	169	94	107	239	249	NA	NA	NA	NA
442	Abos107	Madagascar	-	MDG52	-20.18	47.75	2011	H. Rasolofoarivao	P0Q	A1	x	A	212	214	96	102	175	181	136	136	133	137	128	130	NA	NA	106	106	220	230	169	169	94	107	239	249	NA	NA	NA	NA
443	Abos108	Madagascar	-	MDG52	-20.18	47.75	2011	H. Rasolofoarivao	P0Q	A1	x	A	210	212	96	102	181	181	136	147	133	133	128	128	NA	NA	106	106	220	220	169	169	94	107	233	247	NA	NA	NA	NA
444	Abos111	Madagascar	-	MDG52	-20.18	47.75	2011	H. Rasolofoarivao	P0Q	A1	x	A	210	210	102	102	181	181	136	149	133	137	128	128	184	184	106	106	NA	NA	169	169	107	107	NA	NA	NA	NA	NA	NA
445	AbosAmb03	Madagascar	-	MDG53	-20.53	47.25	2013	H. Rasolofoarivao	P0Q	A1	A1_MAD3	A	212	214	102	102	181	181	136	147	137	137	128	128	184	184	106	106	220	220	169	169	94	107	233	233	102	102	179	185
446	AbosAmb01	Madagascar	-	MDG53	-20.53	47.25	2013	H. Rasolofoarivao	P0Q	A1	x	A	210	212	102	102	181	181	147	149	133	133	128	128	184	184	106	106	NA	NA	169	169	94	94	233	237	98	98	181	183
447	AbosAmb02	Madagascar	-	MDG53	-20.53	47.25	2013	H. Rasolofoarivao	P0Q	A1	x	A	212	214	102	102	181	181	147	147	132	137	128	128	184	230	106	106	230	230	169	169	94	107	245	247	100	102	NA	NA
448	AbosAmb04	Madagascar	-	MDG53	-20.53	47.25	2013	H. Rasolofoarivao	P0Q	A1	x	A	210	212	102	102	181	181	147	147	137	137	128	128	184	184	106	106	220	230	169	169	94	107	233	239	102	102	NA	NA
449	AbosAmb05	Madagascar	-	MDG53	-20.53	47.25	2013	H. Rasolofoarivao	P0Q	A1	x	A	210	210	102	102	181	181	149	149	132	133	128	128	184	234	106	106	224	228	169	169	94	107	233	239	102	102	NA	NA
450	AbosAmb06	Madagascar	-	MDG53	-20.53	47.25	2013	H. Rasolofoarivao	P0Q	A1	x	A	210	210	102	102	181	181	136	149	132	137	NA	NA	184	184	106	106	228	230	169	169	94	107	237	239	102	102	127	179
451	AbosAmb07	Madagascar	-	MDG53	-20.53	47.25	2013	H. Rasolofoarivao	P0Q	A1	x	A	210	214	96	102	181	181	136	136	137	137	128	128	184	230	106	106	220	220	169	169	94	107	239	239	102	102	181	181
452	AbosAmb09	Madagascar	-	MDG53	-20.53	47.25	2013	H. Rasolofoarivao	P0Q	A1	x	A	210	212	102	102	181	181	136	147	132	137	128	128	NA	NA	106	106	230	230	169	169	94	107	231	233	102	102	129	129
453	AbosAmb10	Madagascar	-	MDG53	-20.53	47.25	2013	H. Rasolofoarivao	P0Q	A1	x	A	212	214	96	102	181	183	136	149	133	137	128	128	184	184	106	106	NA	NA	169	169	94	94	NA	NA	NA	NA	NA	NA
454	AbosAmb11	Madagascar	-	MDG53	-20.53	47.25	2013	H. Rasolofoarivao	P0Q	A1	x	A	210	212	102	102	181	181	147	149	137	137	128	128	NA	NA	106	106	228	230	169	169	NA	NA	NA	NA	94	102	NA	NA
455	AbosAmb11x	Madagascar	-	MDG53	-20.53	47.25	2013	H. Rasolofoarivao	P0Q	A1	x	A	212	212	102	102	181	181	147	149	133	137	128	128	184	184	106	110	230	230	169	169	94	94	NA	NA	94	102	127	129
456	Abos041	Madagascar	-	MDG54	-20.68	47.43	2011	H. Rasolofoarivao	P0Q	A1	x	A	NA	NA	96	102	177	183	136	147	132	133	128	128	NA	NA	106	110	230	230	169	169	94	94	233	239	102	102	183	187
457	Abos042	Madagascar	-	MDG54	-20.68	47.43	2011	H. Rasolofoarivao	P0Q	A1	x	A	210	212	102	102	181	181	136	149	133	137	NA	NA	184	184	106	106	220	220	NA	NA	NA	NA	NA	NA	102	102	129	187
458	Abos043	Madagascar	-	MDG54	-20.68	47.43	2011	H. Rasolofoarivao	P0Q	A1	x	A	210	210	102	102	181	181	136	149	137	137	128	128	184	184	106	106	230	230	169	169	94	107	239	249	102	102	129	129
459	Abos044	Madagascar	-	MDG54	-20.68	47.43	2011	H. Rasolofoarivao	P0Q	A1	x	A	210	212	102	102	181	181	136	136	133	137	128	128	184	184	106	106	230	232	169	169	94	107	233	233	102	102	127	129
460	Abos045	Madagascar	-	MDG54	-20.68	47.43	2011	H. Rasolofoarivao	P0Q	A1	x	A	210	212	96	96	181	181	147	149	133	137	NA	NA	NA	NA	106	106	230	230	169	169	94	94	NA	NA	98	102	129	181
461	Abos046	Madagascar	-	MDG54	-20.68	47.43	2011	H. Rasolofoarivao	P0Q	A1	x	A	NA	NA	96	102	NA	NA	136	136	137	137	128	128	184	184	106	106	230	230	169	169	94	107	231	239	102	102	129	181
462	Abos047	Madagascar	-	MDG54	-20.68	47.43	2011	H. Rasolofoarivao	P0Q	A1	x	A	NA	NA	102	102	NA	NA	136	147	133	137	128	128	184	184	106	106	220	230	169	169	94	107	231	239	102	102	129	181
463	Abos048	Madagascar	-	MDG54	-20.68	47.43	2011	H. Rasolofoarivao	P0Q	A1	x	A	210	212	96	102	175	181	147	149	133	133	130	130	NA	NA	106	106	220	220	169	169	94	107	233	237	102	102	127	129
464	Abos049	Madagascar	-	MDG54	-20.68	47.43	2011	H. Rasolofoarivao	P0Q	A1	x	A	210	212	102	102	181	181	149	149	133	133	128	128	184	224	106	106	220	230	169	169	94	107	233	237	102	102	129	189
465	Abos050	Madagascar	-	MDG54	-20.68	47.43	2011	H. Rasolofoarivao	P0Q	A1	x	A	212	214	102	102	181	181	136	147	133	137	128	128	184	232	106	106	220	230	169	169	94	107	NA	NA	102	102	181	183
466	Abos051	Madagascar	-	MDG54	-20.68	47.43	2011	H. Rasolofoarivao	P0Q	A1	x	A	210	212	96	102	181	181	136	147	137	137	128	128	230	230	106	106	228	230	169	169	NA	NA	NA	NA	102	102	181	183
467	Abos052	Madagascar	-	MDG54	-20.68	47.43	2011	H. Rasolofoarivao	P0Q	A1	x	A	212	212	102	102	NA	NA	136	136	137	137	128	128	184	232	106	106	228	230	169	169	107	107	NA	NA	102	102	129	129
468	Abos053	Madagascar	-	MDG54	-20.68	47.43	2011	H. Rasolofoarivao	P0Q	A1	x	A	212	212	96	102	181	181	136	147	137	137	128	128	184	232	106	106	230	230	169	169	94	107	NA	NA	102	102	129	181
469	Abos054	Madagascar	-	MDG54	-20.68	47.43	2011	H. Rasolofoarivao	P0Q	A1	x	A	212	214	102	102	181	181	136	149	133	133	128	128	184	232	106	110	216	230	NA	NA	94	94	NA	NA	102	102	129	189
470	Abos055	Madagascar	-	MDG54	-20.68	47.43	2011	H. Rasolofoarivao	P0Q	A1	x	A	210	212	96	102	181	181	149	149	133	133	128	128	184	234	106	110	230	230	NA	NA	94	94	NA	NA	102	102	129	129
471	Abos056	Madagascar	-	MDG54	-20.68	47.43	2011	H. Rasolofoarivao	P0Q	A1	x	A	212	212	102	102	181	181	147	151	137	137	128	128	184	184	106	106	220	230	169	169	94	107	231	235	102	102	129	129
472	Abos057	Madagascar	-	MDG54	-20.68	47.43	2011	H. Rasolofoarivao	P0Q	A1	x	A	210	210	102	102	181	181	136	149	132	137	128	128	184	184	106	106	230	230	169	169	94	107	NA	NA	102	102	129	129
473	Abos058	Madagascar	-	MDG54	-20.68	47.43	2011	H. Rasolofoarivao	P0Q	A1	x	A	212	212	102	102	181	181	136	149	133	137	128	128	184	184	106	106	220	230	169	169	94	107	231	233	102	102	129	129
474	Abos059	Madagascar	-	MDG54	-20.68	47.43	2011	H. Rasolofoarivao	P0Q	A1	x	A	212	212	96	102	175	181	136	149	133	137	128	130	226	232	106	106	220	220	169	169	107	107	233	237	102	102	127	127
475	Abos060	Madagascar	-	MDG54	-20.68	47.43	2011	H. Rasolofoarivao	P0Q	A1	x	A	212	212	102	102	181	181	136	147	133	133	128	128	184	230	106	106	230	234	169	169	NA	NA	NA	NA	102	102	129	181
476	Abos061	Madagascar	-	MDG54	-20.68	47.43	2011	H. Rasolofoarivao	P0Q	A1	x	A	NA	NA	NA	NA	NA	NA	136	147	133	137	126	126	184	230	106	106	230	230	169	169	NA	NA	NA	NA	98	102	127	129
477	Abos062	Madagascar	-	MDG54	-20.68	47.43	2011	H. Rasolofoarivao	P0Q	A1	x	A	212	212	96	102	181	181	136	149	133	133	128	128	184	184	106	106	220	224	169	169	94	107	NA	NA	102	102	129	189
478	Abos063	Madagascar	-	MDG54	-20.68	47.43	2011	H. Rasolofoarivao	P0Q	A1	x	A	210	212	102	102	181	181	136	136	133	137	128	128	NA	NA	106	106	230	230	169	169	94	107	NA	NA	102	102	129	183
479	Abos064	Madagascar	-	MDG54	-20.68	47.43	2011	H. Rasolofoarivao	P0Q	A1	x	A	210	214	102	102	181	181	136	147	132	137	128	128	NA	NA	106	110	216	230	169	169	94	107	233	239	102	102	179	187
480	Abos065	Madagascar	-	MDG54	-20.68	47.43	2011	H. Rasolofoarivao	P0Q	A1	x	A	210	212	96	102	NA	NA	147	147	132	133	128	128	184	184	106	106	NA	NA	169	169	94	94	NA	NA	102	102	127	129
481	Abos066	Madagascar	-	MDG54	-20.68	47.43	2011	H. Rasolofoarivao	P0Q	A1	x	A	210	210	102	102	181	181	147	147	133	137	128	128	184	184	106	106	230	230	169	169	94	94	231	239	102	102	129	129
482	Abos067	Madagascar	-	MDG54	-20.68	47.43	2011	H. Rasolofoarivao	P0Q	A1	x	A	210	210	102	102	181	181	136	147	133	137	NA	NA	184	232	106	106	224	228	169	169	94	94	NA	NA	NA	NA	NA	NA
483	Abos068	Madagascar	-	MDG54	-20.68	47.43	2011	H. Rasolofoarivao	P0Q	A1	x	A	210	212	96	102	181	181	136	136	137	137	128	128	NA	NA	106	106	NA	NA	169	169	94	94	NA	NA	102	102	181	185
484	Abos069	Madagascar	-	MDG54	-20.68	47.43	2011	H. Rasolofoarivao	P0Q	A1	x	A	210	212	102	102	181	181	136	147	132	133	128	128	184	184	106	106	230	230	169	169	94	94	239	249	102	102	129	129
485	Abos070	Madagascar	-	MDG54	-20.68	47.43	2011	H. Rasolofoarivao	P0Q	A1	x	A	212	212	102	102	181	181	147	149	133	137	128	128	184	232	106	110	220	220	NA	NA	NA	NA	NA	NA	102	102	129	181
486	Abos071	Madagascar	-	MDG54	-20.68	47.43	2011	H. Rasolofoarivao	P0Q	A1	x	A	212	212	96	102	181	181	147	147	132	133	128	128	184	234	106	106	230	230	169	169	94	94	231	233	102	102	127	129
487	Abos072	Madagascar	-	MDG54	-20.68	47.43	2011	H. Rasolofoarivao	P0Q	A1	x	A	212	214	102	102	181	181	136	149	133	137	NA	NA	232	238	106	106	230	230	169	169	94	94	239	239	102	102	129	179
488	Abos073	Madagascar	-	MDG54	-20.68	47.43	2011	H. Rasolofoarivao	P0Q	A1	x	A	210	212	96	102	175	181	NA	NA	NA	NA	128	128	184	232	106	106	220	230	169	169	94	94	239	239	102	102	NA	NA
489	Abos074	Madagascar	-	MDG54	-20.68	47.43	2011	H. Rasolofoarivao	P0Q	A1	x	A	210	210	96	102	181	181	136	149	133	137	128	128	184	226	106	106	230	230	169	169	94	94	233	233	98	102	179	185
490	Abos075	Madagascar	-	MDG54	-20.68	47.43	2011	H. Rasolofoarivao	P0Q	A1	x	A	210	210	102	102	181	181	136	147	132	133	128	128	184	232	106	106	230	230	169	169	94	94	231	237	102	102	129	129
491	Abos076	Madagascar	-	MDG54	-20.68	47.43	2011	H. Rasolofoarivao	P0Q	A1	x	A	210	210	102	102	181	181	136	149	132	137	128	128	184	184	106	106	230	230	169	169	94	107	233	233	102	102	127	129
492	Abos077	Madagascar	-	MDG54	-20.68	47.43	2011	H. Rasolofoarivao	P0Q	A1	x	A	210	214	102	102	181	181	136	149	137	137	NA	NA	184	232	106	110	228	230	169	169	94	94	NA	NA	NA	NA	NA	NA
493	Abos078	Madagascar	-	MDG54	-20.68	47.43	2011	H. Rasolofoarivao	P0Q	A1	x	A	210	212	102	102	181	181	147	149	137	137	128	128	184	184	106	106	230	230	169	169	94	94	NA	NA	102	102	127	129
494	Abos079	Madagascar	-	MDG54	-20.68	47.43	2011	H. Rasolofoarivao	P0Q	A1	x	A	212	214	96	102	181	181	136	149	137	137	128	128	184	184	106	110	230	230	169	169	94	94	NA	NA	102	102	129	129
495	Abos080	Madagascar	-	MDG54	-20.68	47.43	2011	H. Rasolofoarivao	P0Q	A1	x	A	210	212	96	102	181	181	147	147	132	133	128	128	184	184	106	106	230	230	169	169	94	94	233	249	102	102	127	129
496	Abos082	Madagascar	-	MDG54	-20.68	47.43	2011	H. Rasolofoarivao	P0Q	A1	x	A	NA	NA	102	102	NA	NA	136	149	133	137	128	128	184	184	106	110	224	230	169	169	94	107	239	239	102	102	181	181
497	Abos083	Madagascar	-	MDG54	-20.68	47.43	2011	H. Rasolofoarivao	P0Q	A1	x	A	212	212	102	102	181	181	136	136	133	133	130	130	NA	NA	106	106	220	220	169	169	94	94	249	249	102	102	179	179
498	Abos097	Madagascar	-	MDG54	-20.68	47.43	2011	H. Rasolofoarivao	P0Q	A1	x	A	212	212	NA	NA	181	181	136	147	132	137	128	128	184	232	106	106	230	230	169	169	94	107	231	233	NA	NA	NA	NA
499	Abos098	Madagascar	-	MDG54	-20.68	47.43	2011	H. Rasolofoarivao	P0Q	A1	x	A	212	212	96	102	175	181	136	149	137	137	128	128	184	230	106	106	220	220	169	169	94	107	233	233	NA	NA	NA	NA
500	Abos099	Madagascar	-	MDG54	-20.68	47.43	2011	H. Rasolofoarivao	P0Q	A1	x	A	210	212	102	102	181	181	147	149	137	137	128	128	184	184	106	106	230	230	169	169	94	107	233	239	NA	NA	NA	NA
501	Abos003	Madagascar	-	MDG55	-20.84	47.55	2011	H. Rasolofoarivao	P0Q	A1	x	A	212	212	102	102	181	181	136	136	133	137	128	130	NA	NA	106	106	NA	NA	169	169	94	107	NA	NA	NA	NA	NA	NA
502	Abos004	Madagascar	-	MDG55	-20.84	47.55	2011	H. Rasolofoarivao	P0Q	A1	x	A	210	210	102	102	NA	NA	136	147	132	137	128	128	184	184	106	106	230	230	NA	NA	94	107	NA	NA	NA	NA	NA	NA
503	Abos005	Madagascar	-	MDG55	-20.84	47.55	2011	H. Rasolofoarivao	P0Q	A1	x	A	212	212	102	102	181	181	136	136	133	133	128	128	NA	NA	106	106	220	220	169	169	94	107	NA	NA	96	96	NA	NA
504	Abos006	Madagascar	-	MDG55	-20.84	47.55	2011	H. Rasolofoarivao	P0Q	A1	x	A	210	210	96	102	181	181	136	136	137	137	130	130	184	184	106	106	220	220	169	169	94	94	NA	NA	100	102	NA	NA
505	Abos007	Madagascar	-	MDG55	-20.84	47.55	2011	H. Rasolofoarivao	P0Q	A1	x	A	212	214	102	102	181	181	136	136	133	137	128	128	232	236	106	110	216	224	169	169	94	94	233	239	NA	NA	NA	NA
506	Abos008	Madagascar	-	MDG55	-20.84	47.55	2011	H. Rasolofoarivao	P0Q	A1	x	A	212	214	96	102	181	181	136	136	137	137	128	128	184	184	106	106	220	224	169	169	94	107	233	239	94	98	NA	NA
507	Abos009	Madagascar	-	MDG55	-20.84	47.55	2011	H. Rasolofoarivao	P0Q	A1	x	A	212	212	96	102	181	181	136	149	133	137	128	128	NA	NA	106	110	220	230	169	169	94	107	233	233	102	102	129	181
508	Abos010	Madagascar	-	MDG55	-20.84	47.55	2011	H. Rasolofoarivao	P0Q	A1	x	A	210	210	102	102	181	181	147	149	133	137	128	128	184	184	106	106	220	230	169	169	94	94	NA	NA	98	102	129	129
509	Abos012	Madagascar	-	MDG55	-20.84	47.55	2011	H. Rasolofoarivao	P0Q	A1	x	A	212	212	102	102	181	181	147	147	133	137	128	130	NA	NA	106	106	230	230	169	169	94	94	239	239	102	102	NA	NA
510	Abos013	Madagascar	-	MDG55	-20.84	47.55	2011	H. Rasolofoarivao	P0Q	A1	x	A	212	214	102	102	181	181	136	149	133	137	NA	NA	232	232	106	106	230	230	169	169	94	94	239	249	NA	NA	NA	NA
511	Abos014	Madagascar	-	MDG55	-20.84	47.55	2011	H. Rasolofoarivao	P0Q	A1	x	A	212	212	96	96	181	181	136	147	133	137	128	128	184	184	106	106	230	230	169	169	107	107	235	239	102	102	129	129
512	Abos015	Madagascar	-	MDG55	-20.84	47.55	2011	H. Rasolofoarivao	P0Q	A1	x	A	210	212	102	102	181	181	147	149	132	133	128	128	184	184	106	106	220	230	169	169	94	107	231	239	102	102	129	129
513	Abos018	Madagascar	-	MDG55	-20.84	47.55	2011	H. Rasolofoarivao	P0Q	A1	x	A	NA	NA	NA	NA	NA	NA	147	149	133	137	128	128	184	232	106	106	220	230	169	169	94	94	239	249	102	102	129	181
514	Abos019	Madagascar	-	MDG55	-20.84	47.55	2011	H. Rasolofoarivao	P0Q	A1	x	A	210	210	92	102	181	181	149	151	132	137	128	128	234	234	106	106	230	230	169	169	94	94	235	239	102	102	129	179
515	Abos020	Madagascar	-	MDG55	-20.84	47.55	2011	H. Rasolofoarivao	P0Q	A1	x	A	212	214	92	102	181	181	NA	NA	133	137	128	128	184	236	106	106	230	232	169	169	94	107	233	233	102	102	NA	NA
516	Abos021	Madagascar	-	MDG55	-20.84	47.55	2011	H. Rasolofoarivao	P0Q	A1	x	A	212	212	96	102	181	181	136	147	132	137	128	128	184	184	106	106	230	230	169	169	94	107	231	233	102	102	129	181
517	Abos022	Madagascar	-	MDG55	-20.84	47.55	2011	H. Rasolofoarivao	P0Q	A1	x	A	210	212	92	96	181	181	149	149	132	137	NA	NA	184	184	106	106	228	232	169	169	94	94	233	239	102	102	183	185
518	Abos023	Madagascar	-	MDG55	-20.84	47.55	2011	H. Rasolofoarivao	P0Q	A1	x	A	212	212	102	102	175	175	136	136	137	137	128	128	NA	NA	106	106	228	230	169	169	107	107	NA	NA	102	102	129	129
519	Abos024	Madagascar	-	MDG55	-20.84	47.55	2011	H. Rasolofoarivao	P0Q	A1	x	A	210	212	102	102	181	181	136	149	133	137	128	128	NA	NA	106	106	220	224	169	169	94	94	233	233	102	102	129	189
520	Abos025	Madagascar	-	MDG55	-20.84	47.55	2011	H. Rasolofoarivao	P0Q	A1	x	A	212	212	102	102	181	181	147	147	133	137	128	128	184	184	106	106	220	230	169	169	94	107	231	239	102	102	129	181
521	Abos026	Madagascar	-	MDG55	-20.84	47.55	2011	H. Rasolofoarivao	P0Q	A1	x	A	210	212	102	102	NA	NA	136	149	133	137	128	128	186	186	106	106	220	230	169	169	94	107	233	233	98	102	129	129
522	Abos027	Madagascar	-	MDG55	-20.84	47.55	2011	H. Rasolofoarivao	P0Q	A1	x	A	212	214	102	102	NA	NA	147	149	137	137	128	128	184	184	106	106	230	230	169	169	94	94	NA	NA	98	102	127	129
523	Abos028	Madagascar	-	MDG55	-20.84	47.55	2011	H. Rasolofoarivao	P0Q	A1	x	A	210	212	102	102	181	181	136	149	132	137	128	128	184	184	106	106	230	230	169	169	94	107	NA	NA	102	102	129	129
524	Abos030	Madagascar	-	MDG55	-20.84	47.55	2011	H. Rasolofoarivao	P0Q	A1	x	A	NA	NA	96	102	NA	NA	136	149	133	133	128	128	NA	NA	106	106	230	230	169	169	94	94	NA	NA	98	102	129	129
525	Abos035	Madagascar	-	MDG55	-20.84	47.55	2011	H. Rasolofoarivao	P0Q	A1	x	A	210	210	96	102	NA	NA	149	149	133	137	128	128	230	234	106	106	230	230	169	169	94	107	235	239	98	102	127	129
526	Abos037	Madagascar	-	MDG55	-20.84	47.55	2011	H. Rasolofoarivao	P0Q	A1	x	A	210	210	102	102	NA	NA	136	149	132	137	128	128	184	184	106	106	230	230	169	169	94	107	233	233	98	102	181	183
527	Abos039	Madagascar	-	MDG55	-20.84	47.55	2011	H. Rasolofoarivao	P0Q	A1	x	A	210	210	96	102	NA	NA	149	149	133	137	128	128	NA	NA	106	106	230	230	169	169	94	107	235	239	98	102	127	129
528	Abos040	Madagascar	-	MDG55	-20.84	47.55	2011	H. Rasolofoarivao	P0Q	A1	x	A	NA	NA	102	102	NA	NA	136	147	133	137	128	128	NA	NA	106	106	230	230	NA	NA	95	108	NA	NA	102	102	129	129
529	Mor01	Madagascar	-	MDG56	-20.29	44.3	2011	H. Rasolofoarivao	P0Q	A1	x	A	212	212	102	102	181	181	136	149	133	137	128	128	NA	NA	106	106	NA	NA	169	169	94	94	233	233	102	102	NA	NA
530	Mor02	Madagascar	-	MDG56	-20.29	44.3	2011	H. Rasolofoarivao	P0Q	A1	x	A	210	212	96	102	175	181	136	147	132	133	NA	NA	NA	NA	106	106	220	226	169	169	94	94	233	235	102	102	NA	NA
531	Mor03	Madagascar	-	MDG56	-20.29	44.3	2011	H. Rasolofoarivao	P0Q	A1	x	A	212	212	96	102	181	181	149	149	133	137	128	128	184	184	106	106	220	220	169	169	94	107	233	233	102	102	179	183
532	MORMbe32	Madagascar	-	MDG57	-20.33	44.7	2013	H. Rasolofoarivao	P0Q	A1	x	A	210	212	96	102	181	181	147	147	132	137	128	128	184	184	106	106	220	230	169	169	94	107	233	237	98	102	129	129
533	MORTbe19	Madagascar	-	MDG58	-20.35	44.41	2013	H. Rasolofoarivao	P0Q	A1	x	A	210	212	102	102	181	181	136	136	137	137	128	128	184	230	106	106	220	230	169	169	94	94	233	245	102	102	177	181
534	MORTbe20	Madagascar	-	MDG58	-20.35	44.41	2013	H. Rasolofoarivao	P0Q	A1	x	A	210	214	102	102	181	181	136	136	137	137	128	128	184	234	106	106	220	232	169	169	94	107	233	245	102	102	127	129
535	MORTbe21	Madagascar	-	MDG58	-20.35	44.41	2013	H. Rasolofoarivao	P0Q	A1	x	A	NA	NA	98	100	175	179	136	136	133	137	128	128	230	230	106	106	220	220	169	169	94	94	233	245	102	102	181	185
536	MORTbe23	Madagascar	-	MDG58	-20.35	44.41	2013	H. Rasolofoarivao	P0Q	A1	x	A	NA	NA	NA	NA	NA	NA	136	136	133	137	128	128	184	184	106	106	230	232	169	169	94	107	233	239	102	102	173	181
537	MORTbe24	Madagascar	-	MDG58	-20.35	44.41	2013	H. Rasolofoarivao	P0Q	A1	x	A	210	214	102	102	181	183	147	149	132	133	128	128	184	184	106	106	220	230	169	169	94	107	233	247	102	102	179	183
538	MORTKE02	Madagascar	-	MDG59	-20.38	44.3	2013	H. Rasolofoarivao	P0Q	A1	x	A	210	210	102	102	175	181	147	149	132	137	128	128	184	184	106	106	220	230	169	169	94	94	239	241	102	102	173	181
539	MORTKE05	Madagascar	-	MDG59	-20.38	44.3	2013	H. Rasolofoarivao	P0Q	A1	x	A	NA	NA	NA	NA	NA	NA	136	149	133	137	NA	NA	184	184	106	106	230	232	169	169	94	107	NA	NA	102	102	127	181
540	MORTKE06	Madagascar	-	MDG59	-20.38	44.3	2013	H. Rasolofoarivao	P0Q	A1	x	A	210	214	100	100	175	177	136	147	133	137	126	128	184	184	106	106	232	232	169	169	94	107	233	247	102	102	181	183
541	MORAhiva25	Madagascar	-	MDG60	-20.39	44.88	2013	H. Rasolofoarivao	P0Q	A1	x	A	210	214	NA	NA	173	181	147	147	133	133	128	128	184	230	106	106	220	230	169	169	94	107	233	233	102	102	127	183
542	MORAhiva26	Madagascar	-	MDG60	-20.39	44.88	2013	H. Rasolofoarivao	P0Q	A1	x	A	210	210	102	102	175	181	136	149	133	137	128	128	184	184	106	106	220	228	169	169	94	94	233	247	102	102	181	183
543	MORAhiva27	Madagascar	-	MDG60	-20.39	44.88	2013	H. Rasolofoarivao	P0Q	A1	x	A	210	210	102	104	175	181	149	149	133	137	128	128	NA	NA	106	106	220	228	169	169	94	94	233	239	102	102	179	183
544	MORAKE01	Madagascar	-	MDG61	-20.39	44.89	2013	H. Rasolofoarivao	P0Q	A1	x	A	NA	NA	NA	NA	NA	NA	147	147	133	133	126	128	184	184	106	106	220	230	169	169	94	94	239	249	98	102	183	183
545	MORMBY02	Madagascar	-	MDG62	-20.44	44.7	2013	H. Rasolofoarivao	P0Q	A1	x	A	210	214	102	102	181	181	136	147	133	133	128	128	184	184	106	106	222	232	169	169	94	107	233	239	102	102	179	181
546	MORMBY03	Madagascar	-	MDG62	-20.44	44.7	2013	H. Rasolofoarivao	P0Q	A1	x	A	210	210	102	102	181	181	136	149	133	133	128	128	184	184	106	106	220	226	169	169	94	107	233	247	102	102	NA	NA
547	MORMBY05	Madagascar	-	MDG62	-20.44	44.7	2013	H. Rasolofoarivao	P0Q	A1	x	A	210	210	NA	NA	NA	NA	149	149	132	137	NA	NA	184	184	106	106	230	230	169	169	94	107	245	249	102	102	181	181
548	MORMBY07	Madagascar	-	MDG62	-20.44	44.7	2013	H. Rasolofoarivao	P0Q	A1	x	A	212	214	102	102	175	181	136	149	133	137	NA	NA	NA	NA	106	106	220	228	169	169	107	107	231	235	98	102	179	181
549	MORMRA02	Madagascar	-	MDG62	-20.44	44.7	2013	H. Rasolofoarivao	P0Q	A1	x	A	NA	NA	102	102	NA	NA	136	136	137	137	NA	NA	184	184	106	106	220	220	NA	NA	94	94	NA	NA	102	102	127	127
550	MORMRA03	Madagascar	-	MDG62	-20.44	44.7	2013	H. Rasolofoarivao	P0Q	A1	x	A	NA	NA	NA	NA	NA	NA	136	149	133	137	128	128	184	236	106	106	220	232	169	169	94	94	233	239	NA	NA	NA	NA
551	MORMRA04	Madagascar	-	MDG62	-20.44	44.7	2013	H. Rasolofoarivao	P0Q	A1	x	A	NA	NA	NA	NA	NA	NA	149	149	133	133	NA	NA	NA	NA	106	106	220	220	169	169	94	107	233	233	102	102	181	181
552	MORMRA05	Madagascar	-	MDG62	-20.44	44.7	2013	H. Rasolofoarivao	P0Q	A1	x	A	214	214	NA	NA	175	181	149	149	137	137	126	128	184	184	106	106	222	230	169	169	94	94	233	243	NA	NA	183	183
553	MORMRA06	Madagascar	-	MDG62	-20.44	44.7	2013	H. Rasolofoarivao	P0Q	A1	x	A	212	212	102	102	181	181	147	149	133	133	NA	NA	NA	NA	106	106	230	230	169	169	94	94	233	235	102	102	127	181
554	MORMRA07	Madagascar	-	MDG62	-20.44	44.7	2013	H. Rasolofoarivao	P0Q	A1	x	A	210	212	102	102	181	181	136	147	137	137	128	128	184	184	106	106	NA	NA	NA	NA	NA	NA	NA	NA	102	102	127	127
555	MORAvbe01	Madagascar	-	MDG63	-20.44	44.88	2013	H. Rasolofoarivao	P0Q	A1	x	A	210	212	96	102	175	181	136	147	137	137	128	128	184	228	106	106	220	230	169	169	107	107	233	239	102	102	129	179
556	MORAvbe03	Madagascar	-	MDG63	-20.44	44.88	2013	H. Rasolofoarivao	P0Q	A1	x	A	212	214	96	102	175	181	136	149	132	137	128	128	184	184	106	106	230	230	169	169	107	107	235	239	98	102	127	183
557	MORAvbe04	Madagascar	-	MDG63	-20.44	44.88	2013	H. Rasolofoarivao	P0Q	A1	x	A	210	210	96	102	181	181	NA	NA	133	137	NA	NA	NA	NA	NA	NA	NA	NA	169	169	94	94	233	233	102	102	181	185
558	MORAvbe11	Madagascar	-	MDG63	-20.44	44.88	2013	H. Rasolofoarivao	P0Q	A1	x	A	210	212	96	102	175	181	147	149	132	133	128	128	230	232	106	106	226	232	169	169	94	94	247	247	98	98	179	183
559	MORAvbe12	Madagascar	-	MDG63	-20.44	44.88	2013	H. Rasolofoarivao	P0Q	A1	x	A	210	214	102	102	175	181	136	147	133	133	128	128	184	230	106	110	226	230	169	169	94	94	233	233	NA	NA	NA	NA
560	MORAvbe13	Madagascar	-	MDG63	-20.44	44.88	2013	H. Rasolofoarivao	P0Q	A1	x	A	212	212	96	102	181	181	147	147	133	133	NA	NA	NA	NA	106	106	230	230	169	169	94	94	233	249	98	102	179	181
561	MORAvbe14	Madagascar	-	MDG63	-20.44	44.88	2013	H. Rasolofoarivao	P0Q	A1	x	A	212	212	96	102	175	175	136	147	132	132	128	128	184	184	106	106	220	232	169	169	94	107	233	247	98	98	127	179
562	MORAvbe15	Madagascar	-	MDG63	-20.44	44.88	2013	H. Rasolofoarivao	P0Q	A1	x	A	210	212	96	102	175	175	147	149	132	133	128	128	NA	NA	106	106	220	232	169	169	94	107	233	247	98	98	NA	NA
563	MORAvbe17	Madagascar	-	MDG63	-20.44	44.88	2013	H. Rasolofoarivao	P0Q	A1	x	A	212	214	96	102	181	181	136	136	133	137	128	128	230	234	106	106	230	232	169	169	107	107	233	233	102	102	179	187
564	MORAvbe18	Madagascar	-	MDG63	-20.44	44.88	2013	H. Rasolofoarivao	P0Q	A1	x	A	210	212	102	102	175	179	149	149	133	137	126	128	184	230	106	106	220	230	169	169	107	107	233	239	102	102	127	129
565	MORPM01	Madagascar	-	MDG64	-20.45	44.88	2013	H. Rasolofoarivao	P0Q	A1	x	A	210	212	102	102	181	181	147	147	133	137	128	128	184	184	106	106	220	228	169	169	94	94	239	239	102	102	181	183
566	MORPM02	Madagascar	-	MDG64	-20.45	44.88	2013	H. Rasolofoarivao	P0Q	A1	x	A	210	212	102	102	181	181	149	149	137	137	128	128	184	184	106	106	220	232	169	169	107	107	233	239	102	102	129	177
567	MORPM04	Madagascar	-	MDG64	-20.45	44.88	2013	H. Rasolofoarivao	P0Q	A1	x	A	NA	NA	NA	NA	NA	NA	136	149	132	137	128	128	184	184	106	106	230	234	NA	NA	94	108	NA	NA	102	102	129	183
568	MORPM05	Madagascar	-	MDG64	-20.45	44.88	2013	H. Rasolofoarivao	P0Q	A1	x	A	NA	NA	NA	NA	NA	NA	136	136	133	133	128	128	184	184	106	106	220	230	NA	NA	94	94	NA	NA	102	102	181	181
569	MORPM09	Madagascar	-	MDG64	-20.45	44.88	2013	H. Rasolofoarivao	P0Q	A1	x	A	212	214	96	102	181	181	136	149	133	137	126	128	184	184	106	106	230	232	169	169	94	107	239	239	96	102	NA	NA
570	MORPM12	Madagascar	-	MDG64	-20.45	44.88	2013	H. Rasolofoarivao	P0Q	A1	x	A	210	212	102	102	181	181	147	149	137	137	128	128	NA	NA	106	106	230	230	169	169	94	107	237	239	102	102	181	181
571	MORPM13	Madagascar	-	MDG64	-20.45	44.88	2013	H. Rasolofoarivao	P0Q	A1	x	A	212	214	102	102	181	181	136	149	132	137	128	128	184	184	106	106	220	230	169	169	94	107	233	233	98	102	129	183
572	MORPM15	Madagascar	-	MDG64	-20.45	44.88	2013	H. Rasolofoarivao	P0Q	A1	x	A	212	212	102	102	181	181	147	149	133	133	128	128	184	184	106	106	216	228	169	169	94	94	233	241	98	102	NA	NA
573	MORPM16	Madagascar	-	MDG64	-20.45	44.88	2013	H. Rasolofoarivao	P0Q	A1	x	A	210	210	96	102	181	181	147	147	133	137	128	128	184	184	106	106	220	230	169	169	94	107	239	247	102	102	179	181
574	MORPM17	Madagascar	-	MDG64	-20.45	44.88	2013	H. Rasolofoarivao	P0Q	A1	x	A	210	210	102	102	181	181	147	149	133	137	128	128	184	184	106	106	230	230	169	169	94	107	NA	NA	96	102	179	183
575	Man05	Madagascar	-	MDG65	-22.2	47.93	2011	H. Rasolofoarivao	P0Q	A1	x	A	210	210	102	102	NA	NA	147	149	133	133	128	128	NA	NA	106	106	220	220	NA	NA	NA	NA	NA	NA	94	102	129	129
576	Man06	Madagascar	-	MDG65	-22.2	47.93	2011	H. Rasolofoarivao	P0Q	A1	x	A	212	214	102	102	181	181	147	149	137	137	128	130	184	184	106	106	228	232	NA	NA	NA	NA	NA	NA	94	102	NA	NA
577	Man08	Madagascar	-	MDG65	-22.2	47.93	2011	H. Rasolofoarivao	P0Q	A1	x	A	212	212	96	102	181	181	136	136	132	133	128	128	228	228	106	106	230	230	169	169	94	94	231	233	102	102	129	181
578	Man09	Madagascar	-	MDG65	-22.2	47.93	2011	H. Rasolofoarivao	P0Q	A1	x	A	210	212	96	102	181	181	147	149	137	137	128	128	184	184	106	106	220	230	169	169	94	108	233	245	100	102	NA	NA
579	Man11	Madagascar	-	MDG65	-22.2	47.93	2011	H. Rasolofoarivao	P0Q	A1	x	A	212	212	102	102	181	181	136	136	137	137	128	128	184	184	106	110	230	234	169	169	94	94	NA	NA	98	102	NA	NA
580	Tu02	Madagascar	-	MDG66	-23.36	43.69	2011	H. Rasolofoarivao	P0QQ	A4	A4_MAD1	A	210	212	102	102	181	181	149	149	137	137	128	128	184	232	106	106	230	232	169	169	94	107	233	233	96	102	129	129
581	Tu03	Madagascar	-	MDG66	-23.36	43.69	2011	H. Rasolofoarivao	P0Q	A1	A1_MAD3	A	210	214	96	102	181	181	147	149	133	133	128	128	184	184	106	106	220	230	169	169	94	94	233	233	102	102	127	185
582	Tu04	Madagascar	-	MDG66	-23.36	43.69	2011	H. Rasolofoarivao	P0Q	A1	A1_MAD3	A	210	214	96	102	181	181	136	149	137	137	128	128	184	184	106	106	220	230	169	169	94	94	233	233	102	102	127	181
583	Tu10	Madagascar	-	MDG66	-23.36	43.69	2011	H. Rasolofoarivao	P0Q	A1	A1_MAD12	A	210	212	102	102	175	181	136	136	132	137	128	128	184	184	106	106	220	230	169	169	94	94	239	239	102	102	127	183
584	Tu13	Madagascar	-	MDG66	-23.36	43.69	2011	H. Rasolofoarivao	P0QQ	A4	x	A	210	214	102	102	181	181	136	136	132	137	128	128	230	230	106	106	220	232	NA	NA	94	94	233	233	102	102	129	181
585	Tu22	Madagascar	-	MDG66	-23.36	43.69	2011	H. Rasolofoarivao	P0Q	A1	A1_MAD3	A	210	210	96	102	181	181	136	136	133	133	128	128	184	184	106	106	220	234	169	169	94	107	233	233	102	102	127	179
586	Tu01	Madagascar	-	MDG66	-23.36	43.69	2011	H. Rasolofoarivao	P0Q	A1	x	A	210	214	96	102	181	181	136	149	133	137	128	128	184	184	106	106	220	228	169	169	94	107	231	233	102	102	129	181
587	Tu05	Madagascar	-	MDG66	-23.36	43.69	2011	H. Rasolofoarivao	P0Q	A1	x	A	212	214	96	102	181	181	136	149	133	137	128	128	184	232	106	106	220	230	169	169	94	94	239	247	96	102	129	179
588	Tu06	Madagascar	-	MDG66	-23.36	43.69	2011	H. Rasolofoarivao	P0Q	A1	x	A	212	214	102	102	181	181	136	136	133	133	128	128	184	232	106	106	216	230	169	169	94	94	233	239	102	102	127	129
589	Tu07	Madagascar	-	MDG66	-23.36	43.69	2011	H. Rasolofoarivao	P0Q	A1	x	A	210	210	102	102	181	181	149	149	133	137	128	128	184	232	106	106	220	232	169	169	94	94	233	239	102	102	179	181
590	Tu08	Madagascar	-	MDG66	-23.36	43.69	2011	H. Rasolofoarivao	P0Q	A1	x	A	212	214	102	102	181	181	136	149	133	133	128	128	184	184	106	106	220	230	169	169	94	107	233	233	102	102	129	177
591	Tu09	Madagascar	-	MDG66	-23.36	43.69	2011	H. Rasolofoarivao	P0Q	A1	x	A	210	210	102	102	181	181	136	147	133	137	128	128	226	232	106	106	216	230	169	169	94	94	NA	NA	102	102	129	129
592	Tu11	Madagascar	-	MDG66	-23.36	43.69	2011	H. Rasolofoarivao	P0Q	A1	x	A	210	214	96	102	181	181	147	149	133	137	128	128	NA	NA	106	106	230	232	169	169	94	107	233	239	98	102	129	181
593	Tu14	Madagascar	-	MDG66	-23.36	43.69	2011	H. Rasolofoarivao	P0Q	A1	x	A	210	210	96	96	181	181	136	136	133	137	122	128	184	184	106	106	220	220	169	169	94	94	233	233	102	102	129	179
594	Tu15	Madagascar	-	MDG66	-23.36	43.69	2011	H. Rasolofoarivao	P0Q	A1	x	A	214	214	102	102	181	181	136	149	137	137	128	128	184	236	106	110	220	228	169	169	94	94	233	243	102	102	181	183
595	Tu16	Madagascar	-	MDG66	-23.36	43.69	2011	H. Rasolofoarivao	P0Q	A1	x	A	210	214	96	102	181	181	136	136	132	132	128	128	184	184	106	106	220	230	169	169	94	107	233	233	102	102	129	181
596	Tu17	Madagascar	-	MDG66	-23.36	43.69	2011	H. Rasolofoarivao	P0Q	A1	x	A	NA	NA	102	102	NA	NA	136	147	137	137	128	128	NA	NA	106	110	220	230	169	169	94	107	233	243	102	102	129	183
597	Tu18	Madagascar	-	MDG66	-23.36	43.69	2011	H. Rasolofoarivao	P0Q	A1	x	A	214	214	102	102	181	181	147	149	133	133	128	128	184	234	106	106	228	230	169	169	94	94	233	241	102	102	179	181
598	Tu19	Madagascar	-	MDG66	-23.36	43.69	2011	H. Rasolofoarivao	P0Q	A1	x	A	212	214	96	102	181	181	136	147	132	133	128	128	184	184	106	106	220	230	169	169	94	94	233	233	102	102	129	183
599	Tu20	Madagascar	-	MDG66	-23.36	43.69	2011	H. Rasolofoarivao	P0Q	A1	x	A	212	214	102	102	181	181	147	149	133	133	128	128	184	184	106	106	220	228	169	169	94	94	237	239	102	102	181	183
600	Tu21	Madagascar	-	MDG66	-23.36	43.69	2011	H. Rasolofoarivao	P0Q	A1	x	A	NA	NA	NA	NA	NA	NA	136	149	137	137	128	128	184	184	106	106	230	232	169	169	94	94	233	233	102	102	129	179
601	Tu23	Madagascar	-	MDG66	-23.36	43.69	2011	H. Rasolofoarivao	P0Q	A1	x	A	210	210	102	102	181	181	136	149	133	133	128	128	184	184	106	106	220	232	169	169	94	107	233	233	102	102	127	181
602	Tu24	Madagascar	-	MDG66	-23.36	43.69	2011	H. Rasolofoarivao	P0Q	A1	x	A	210	212	96	102	181	181	136	149	133	133	128	128	184	184	106	106	220	220	NA	NA	94	94	233	233	102	102	179	181
603	Tu25	Madagascar	-	MDG66	-23.36	43.69	2011	H. Rasolofoarivao	P0Q	A1	x	A	210	210	102	102	175	181	136	147	133	133	128	128	184	184	106	106	220	220	169	169	94	94	233	247	102	102	183	183
604	Tu26	Madagascar	-	MDG66	-23.36	43.69	2011	H. Rasolofoarivao	P0Q	A1	x	A	214	214	102	102	181	181	136	136	132	133	128	128	184	228	106	106	220	220	169	169	94	94	233	233	102	102	183	183
605	Tu27	Madagascar	-	MDG66	-23.36	43.69	2011	H. Rasolofoarivao	P0Q	A1	x	A	210	210	102	102	181	181	136	147	133	133	NA	NA	184	234	106	106	220	228	169	169	94	107	239	247	102	102	129	185
606	Tu28	Madagascar	-	MDG66	-23.36	43.69	2011	H. Rasolofoarivao	P0Q	A1	x	A	212	214	102	102	181	181	136	136	137	137	128	128	184	184	106	106	220	230	169	169	94	94	233	233	102	102	181	183
607	Tu29	Madagascar	-	MDG66	-23.36	43.69	2011	H. Rasolofoarivao	P0Q	A1	x	A	212	212	102	102	181	181	147	149	133	133	128	128	184	232	106	106	228	230	169	169	94	94	233	239	102	102	129	185
608	Tu30	Madagascar	-	MDG66	-23.36	43.69	2011	H. Rasolofoarivao	P0Q	A1	x	A	212	214	102	102	181	181	149	149	133	137	128	128	230	230	106	106	220	220	169	169	94	94	239	239	102	102	179	181
609	Tu34	Madagascar	-	MDG67	-23.5	44.51	2011	H. Rasolofoarivao	P0Q	A1	A1_MAD3	A	212	212	102	102	175	175	147	149	133	137	128	128	184	184	106	106	220	230	169	169	94	107	233	239	96	102	181	185
610	Tu43	Madagascar	-	MDG67	-23.5	44.51	2011	H. Rasolofoarivao	P0Q	A1	A1_MAD3	A	210	214	102	102	181	181	147	149	133	137	128	128	184	184	106	106	228	230	169	169	94	107	239	239	102	102	129	129
611	Tu44	Madagascar	-	MDG67	-23.5	44.51	2011	H. Rasolofoarivao	P0Q	A1	A1_MAD3	A	210	210	96	102	NA	NA	136	147	137	137	126	128	184	230	106	106	220	230	169	169	94	107	233	247	102	102	129	129
612	Tu45	Madagascar	-	MDG67	-23.5	44.51	2011	H. Rasolofoarivao	P0Q	A1	A1_MAD3	A	210	212	102	102	181	181	136	136	133	133	NA	NA	NA	NA	106	106	NA	NA	NA	NA	94	94	233	233	102	102	127	179
613	Tu31	Madagascar	-	MDG67	-23.5	44.51	2011	H. Rasolofoarivao	P0Q	A1	x	A	212	212	102	102	175	181	147	149	133	133	128	128	184	232	106	106	230	230	169	169	94	94	239	247	102	102	179	185
614	Tu32	Madagascar	-	MDG67	-23.5	44.51	2011	H. Rasolofoarivao	P0Q	A1	x	A	212	212	102	102	175	181	147	147	133	133	128	128	184	184	106	106	230	230	169	169	94	107	247	247	102	102	179	181
615	Tu33	Madagascar	-	MDG67	-23.5	44.51	2011	H. Rasolofoarivao	P0Q	A1	x	A	NA	NA	102	102	NA	NA	149	149	133	137	128	128	184	228	106	110	220	220	169	169	94	94	233	239	102	102	129	181
616	Tu35	Madagascar	-	MDG67	-23.5	44.51	2011	H. Rasolofoarivao	P0Q	A1	x	A	212	212	102	102	181	181	136	136	133	137	128	128	184	232	106	106	220	228	169	169	94	94	233	247	102	104	179	181
617	Tu36	Madagascar	-	MDG67	-23.5	44.51	2011	H. Rasolofoarivao	P0Q	A1	x	A	214	214	102	102	181	181	136	147	137	137	128	128	184	230	106	106	220	230	169	169	94	94	233	239	102	102	179	179
618	Tu37	Madagascar	-	MDG67	-23.5	44.51	2011	H. Rasolofoarivao	P0Q	A1	x	A	210	212	102	102	181	181	136	147	137	137	126	128	184	234	106	106	220	230	169	169	94	94	233	233	102	102	129	179
619	Tu38	Madagascar	-	MDG67	-23.5	44.51	2011	H. Rasolofoarivao	P0Q	A1	x	A	210	210	102	102	181	181	147	149	133	137	128	128	184	184	106	106	230	230	169	169	94	107	233	239	96	102	129	129
620	Tu39	Madagascar	-	MDG67	-23.5	44.51	2011	H. Rasolofoarivao	P0Q	A1	x	A	212	212	102	102	181	181	136	149	133	137	128	128	184	184	106	106	230	230	169	169	94	107	233	239	102	102	179	179
621	Tu40	Madagascar	-	MDG67	-23.5	44.51	2011	H. Rasolofoarivao	P0Q	A1	x	A	210	214	102	102	181	181	136	149	132	133	126	128	184	234	106	106	220	230	169	169	94	94	233	239	102	102	129	181
622	Tu41	Madagascar	-	MDG67	-23.5	44.51	2011	H. Rasolofoarivao	P0Q	A1	x	A	212	214	102	102	181	181	136	147	133	133	128	128	184	184	106	106	230	232	169	169	94	94	239	239	102	102	129	183
623	Tu42	Madagascar	-	MDG67	-23.5	44.51	2011	H. Rasolofoarivao	P0Q	A1	x	A	210	214	102	102	181	181	147	149	133	137	128	128	184	184	106	106	220	230	169	169	94	94	233	239	102	102	183	185
624	Tu46	Madagascar	-	MDG67	-23.5	44.51	2011	H. Rasolofoarivao	P0Q	A1	x	A	NA	NA	NA	NA	NA	NA	136	136	133	133	128	130	184	184	106	106	228	232	169	169	107	107	233	241	102	102	129	129
625	Tu47	Madagascar	-	MDG67	-23.5	44.51	2011	H. Rasolofoarivao	P0Q	A1	x	A	212	212	102	102	181	181	136	136	133	137	128	128	184	232	106	106	230	234	169	169	94	107	233	241	102	102	129	183
626	Tu48	Madagascar	-	MDG67	-23.5	44.51	2011	H. Rasolofoarivao	P0Q	A1	x	A	210	214	102	102	181	181	136	149	133	137	126	128	184	234	106	106	220	232	169	169	94	94	233	247	96	102	181	183
627	Tu49	Madagascar	-	MDG67	-23.5	44.51	2011	H. Rasolofoarivao	P0Q	A1	x	A	210	214	96	102	181	181	136	136	137	137	126	128	230	230	106	106	220	232	169	169	107	107	241	247	102	102	183	185
628	Tu50	Madagascar	-	MDG67	-23.5	44.51	2011	H. Rasolofoarivao	P0Q	A1	x	A	212	212	102	102	175	181	136	149	133	137	126	128	224	230	106	106	220	230	169	169	94	94	233	233	102	102	181	185
629	Tu51	Madagascar	-	MDG67	-23.5	44.51	2011	H. Rasolofoarivao	P0Q	A1	x	A	212	212	102	102	181	181	149	149	137	137	128	128	184	232	106	106	220	220	169	169	94	94	235	239	102	102	179	181
630	Tu52	Madagascar	-	MDG67	-23.5	44.51	2011	H. Rasolofoarivao	P0Q	A1	x	A	212	214	96	102	175	181	136	136	137	137	128	128	184	230	106	106	220	220	169	169	94	107	233	239	96	102	129	179
631	Tu53	Madagascar	-	MDG67	-23.5	44.51	2011	H. Rasolofoarivao	P0Q	A1	x	A	212	214	96	102	181	183	136	149	133	137	128	130	184	184	106	106	220	220	169	169	94	107	247	247	102	102	129	179
632	Tu54	Madagascar	-	MDG67	-23.5	44.51	2011	H. Rasolofoarivao	P0Q	A1	x	A	210	212	96	102	181	181	149	149	132	133	128	130	184	184	106	106	230	232	169	169	94	94	233	247	102	102	129	179
633	Tg116	Madagascar	-	MDG68	-24.79	47.09	2011	H. Rasolofoarivao	P0Q	A1	A1_MAD3	A	210	214	100	102	NA	NA	136	149	133	133	128	128	184	184	106	106	230	230	169	169	107	107	233	233	102	102	127	181
634	Tg117	Madagascar	-	MDG68	-24.79	47.09	2011	H. Rasolofoarivao	P0Q	A1	A1_MAD3	A	210	214	NA	NA	NA	NA	136	149	133	133	128	128	NA	NA	106	106	220	230	NA	NA	94	94	233	239	102	102	129	179
635	Tg118	Madagascar	-	MDG68	-24.79	47.09	2011	H. Rasolofoarivao	P0Q	A1	A1_MAD3	A	210	210	102	102	181	181	147	149	132	133	128	128	184	230	106	106	220	230	169	169	94	94	233	233	102	102	131	181
636	Tg102	Madagascar	-	MDG68	-24.79	47.09	2011	H. Rasolofoarivao	P0Q	A1	x	A	210	210	102	102	181	181	136	136	132	133	128	128	184	184	106	106	220	220	169	169	94	94	233	239	102	102	131	183
637	Tg103	Madagascar	-	MDG68	-24.79	47.09	2011	H. Rasolofoarivao	P0Q	A1	x	A	210	212	102	102	181	181	149	149	133	137	128	128	230	236	106	106	220	230	169	169	94	107	233	233	102	102	175	183
638	Tg104	Madagascar	-	MDG68	-24.79	47.09	2011	H. Rasolofoarivao	P0Q	A1	x	A	212	212	102	102	181	181	136	149	132	133	128	128	184	232	106	106	220	228	169	169	94	94	NA	NA	98	102	127	129
639	Tg105	Madagascar	-	MDG68	-24.79	47.09	2011	H. Rasolofoarivao	P0Q	A1	x	A	210	212	96	102	181	181	136	149	132	132	128	128	232	232	106	106	228	230	NA	NA	NA	NA	NA	NA	102	102	129	179
640	Tg106	Madagascar	-	MDG68	-24.79	47.09	2011	H. Rasolofoarivao	P0Q	A1	x	A	210	210	102	102	181	181	136	149	133	137	128	128	184	234	106	106	230	230	169	169	94	107	235	235	96	102	179	187
641	Tg107	Madagascar	-	MDG68	-24.79	47.09	2011	H. Rasolofoarivao	P0Q	A1	x	A	212	212	96	102	181	181	136	149	133	137	128	128	184	184	106	106	228	230	169	169	94	94	235	247	102	102	179	187
642	Tg108	Madagascar	-	MDG68	-24.79	47.09	2011	H. Rasolofoarivao	P0Q	A1	x	A	210	210	96	102	181	183	136	149	133	137	128	128	184	232	106	106	220	230	169	169	94	107	233	247	98	102	127	181
643	Tg109	Madagascar	-	MDG68	-24.79	47.09	2011	H. Rasolofoarivao	P0Q	A1	x	A	210	210	96	102	181	181	136	147	133	137	128	128	184	184	106	106	220	232	169	169	94	94	233	239	102	102	179	181
644	Tg110	Madagascar	-	MDG68	-24.79	47.09	2011	H. Rasolofoarivao	P0Q	A1	x	A	212	212	102	102	181	181	147	149	133	137	128	128	232	234	106	106	220	220	169	169	94	107	233	239	102	102	179	181
645	Tg111	Madagascar	-	MDG68	-24.79	47.09	2011	H. Rasolofoarivao	P0Q	A1	x	A	210	212	96	96	181	183	147	149	137	137	128	128	230	230	106	106	220	220	169	169	94	107	233	247	102	102	127	179
646	Tg112	Madagascar	-	MDG68	-24.79	47.09	2011	H. Rasolofoarivao	P0Q	A1	x	A	210	210	96	102	175	181	147	149	133	137	128	128	184	230	106	106	230	232	169	169	NA	NA	NA	NA	94	102	129	183
647	Tg113	Madagascar	-	MDG68	-24.79	47.09	2011	H. Rasolofoarivao	P0Q	A1	x	A	212	214	102	102	181	181	136	149	133	133	128	128	184	184	106	106	230	230	169	169	107	107	NA	NA	102	102	129	181
648	Tg114	Madagascar	-	MDG68	-24.79	47.09	2011	H. Rasolofoarivao	P0Q	A1	x	A	210	210	96	102	181	181	149	149	137	137	128	128	184	184	106	106	230	230	169	169	94	94	233	235	102	102	129	187
649	Tg115	Madagascar	-	MDG68	-24.79	47.09	2011	H. Rasolofoarivao	P0Q	A1	x	A	212	212	102	102	181	181	136	147	132	133	128	128	184	228	106	106	220	228	169	169	94	107	231	247	98	102	129	129
650	Tg017	Madagascar	-	MDG69	-24.92	46.92	2011	H. Rasolofoarivao	P0Q	A1	x	A	212	212	102	102	181	183	136	149	132	133	128	128	184	184	106	106	220	228	169	169	94	94	NA	NA	102	102	129	129
651	Tg018	Madagascar	-	MDG69	-24.92	46.92	2011	H. Rasolofoarivao	P0Q	A1	x	A	210	212	102	102	181	181	136	147	132	137	128	128	184	184	106	106	228	228	169	169	94	107	NA	NA	102	102	129	129
652	Tg019	Madagascar	-	MDG69	-24.92	46.92	2011	H. Rasolofoarivao	P0Q	A1	x	A	NA	NA	96	96	181	181	149	149	136	137	128	128	184	184	106	106	NA	NA	169	169	94	94	NA	NA	102	102	127	129
653	Tg020	Madagascar	-	MDG69	-24.92	46.92	2011	H. Rasolofoarivao	P0Q	A1	x	A	210	212	96	102	181	181	136	149	133	137	128	128	184	236	106	106	230	232	169	169	94	107	NA	NA	102	102	127	127
654	Tg022	Madagascar	-	MDG69	-24.92	46.92	2011	H. Rasolofoarivao	P0Q	A1	x	A	210	210	102	102	181	181	147	149	133	137	128	128	184	184	106	106	220	220	169	169	94	94	233	233	102	102	127	181
655	Tg023	Madagascar	-	MDG69	-24.92	46.92	2011	H. Rasolofoarivao	P0Q	A1	x	A	210	210	96	102	181	181	136	149	132	133	128	128	230	232	106	106	220	230	169	169	94	107	NA	NA	98	102	NA	NA
656	Tg024	Madagascar	-	MDG69	-24.92	46.92	2011	H. Rasolofoarivao	P0Q	A1	x	A	210	210	102	102	181	181	149	149	133	137	126	128	230	234	106	106	228	230	169	169	107	107	NA	NA	102	102	127	129
657	Tg025	Madagascar	-	MDG69	-24.92	46.92	2011	H. Rasolofoarivao	P0Q	A1	x	A	210	210	96	102	181	181	136	149	137	137	128	128	184	184	106	106	228	228	169	169	94	94	233	239	102	102	127	129
658	Tg092	Madagascar	-	MDG70	-24.93	46.87	2011	H. Rasolofoarivao	P0Q	A1	x	A	210	212	96	102	181	181	136	136	132	132	128	128	184	230	106	106	220	220	169	169	94	94	233	239	98	102	127	129
659	Tg093	Madagascar	-	MDG70	-24.93	46.87	2011	H. Rasolofoarivao	P0Q	A1	x	A	210	210	102	102	181	181	136	136	133	137	128	128	184	230	106	106	228	230	169	169	94	107	233	239	102	102	129	179
660	Tg094	Madagascar	-	MDG70	-24.93	46.87	2011	H. Rasolofoarivao	P0Q	A1	x	A	210	210	96	102	181	181	149	149	133	137	128	128	184	228	106	106	220	230	169	169	94	94	NA	NA	102	102	181	187
661	Tg095	Madagascar	-	MDG70	-24.93	46.87	2011	H. Rasolofoarivao	P0Q	A1	x	A	210	210	102	102	181	181	136	147	132	132	128	128	184	184	106	106	230	230	169	169	94	94	239	239	102	102	129	181
662	Tg096	Madagascar	-	MDG70	-24.93	46.87	2011	H. Rasolofoarivao	P0Q	A1	x	A	210	214	102	102	181	181	147	149	132	137	128	128	184	228	106	106	228	230	169	169	94	107	233	233	98	102	179	179
663	Tg097	Madagascar	-	MDG70	-24.93	46.87	2011	H. Rasolofoarivao	P0Q	A1	x	A	212	212	96	102	181	181	149	149	137	137	128	128	184	230	106	106	220	228	169	169	94	107	233	239	102	102	179	183
664	Tg098	Madagascar	-	MDG70	-24.93	46.87	2011	H. Rasolofoarivao	P0Q	A1	x	A	210	212	96	102	181	181	149	149	133	137	128	128	184	236	106	106	220	230	169	169	94	94	233	233	98	102	129	187
665	Tg099	Madagascar	-	MDG70	-24.93	46.87	2011	H. Rasolofoarivao	P0Q	A1	x	A	210	212	96	102	181	183	147	149	132	137	128	128	184	232	106	106	220	230	169	169	107	107	233	235	98	98	129	129
666	Tg100	Madagascar	-	MDG70	-24.93	46.87	2011	H. Rasolofoarivao	P0Q	A1	x	A	210	212	96	102	181	181	136	149	132	137	128	128	184	232	106	106	230	230	169	169	94	107	233	239	102	102	179	179
667	Tg101	Madagascar	-	MDG70	-24.93	46.87	2011	H. Rasolofoarivao	P0Q	A1	x	A	NA	NA	96	102	NA	NA	149	149	133	137	NA	NA	NA	NA	106	106	228	230	169	169	94	94	233	239	98	102	129	129
668	Tg076	Madagascar	-	MDG71	-24.93	46.88	2011	H. Rasolofoarivao	P0Q	A1	x	A	210	212	96	102	181	181	136	149	137	137	128	128	184	228	106	106	228	232	169	169	94	107	233	237	98	102	129	181
669	Tg077	Madagascar	-	MDG71	-24.93	46.88	2011	H. Rasolofoarivao	P0Q	A1	x	A	208	212	102	102	181	181	136	147	133	133	128	128	184	184	106	106	220	230	169	169	94	94	239	247	102	102	127	183
670	Tg078	Madagascar	-	MDG71	-24.93	46.88	2011	H. Rasolofoarivao	P0Q	A1	x	A	210	210	102	102	181	181	136	136	133	137	128	128	184	184	106	106	230	234	169	169	94	94	233	249	102	102	129	181
671	Tg079	Madagascar	-	MDG71	-24.93	46.88	2011	H. Rasolofoarivao	P0Q	A1	x	A	210	212	102	102	181	181	136	147	133	133	128	128	184	184	106	106	230	230	169	169	94	94	239	241	98	102	129	181
672	Tg080	Madagascar	-	MDG71	-24.93	46.88	2011	H. Rasolofoarivao	P0Q	A1	x	A	210	210	102	102	181	181	149	149	132	133	128	128	184	232	106	106	220	230	169	169	94	107	233	239	98	102	127	179
673	Tg081	Madagascar	-	MDG71	-24.93	46.88	2011	H. Rasolofoarivao	P0Q	A1	x	A	210	212	102	102	181	181	136	136	133	137	128	128	NA	NA	106	106	NA	NA	169	169	94	94	233	239	102	102	127	181
674	Tg082	Madagascar	-	MDG71	-24.93	46.88	2011	H. Rasolofoarivao	P0Q	A1	x	A	210	210	102	102	181	181	147	147	132	137	126	126	184	184	106	106	220	228	169	169	94	107	237	239	102	102	181	187
675	Tg083	Madagascar	-	MDG71	-24.93	46.88	2011	H. Rasolofoarivao	P0Q	A1	x	A	214	214	96	102	181	181	147	149	133	133	128	128	184	184	106	106	220	220	169	169	94	107	233	235	102	102	129	181
676	Tg084	Madagascar	-	MDG71	-24.93	46.88	2011	H. Rasolofoarivao	P0Q	A1	x	A	210	210	102	102	181	181	149	149	133	133	128	130	184	228	106	106	220	228	169	169	94	107	233	233	102	102	129	179
677	Tg085	Madagascar	-	MDG71	-24.93	46.88	2011	H. Rasolofoarivao	P0Q	A1	x	A	210	212	102	102	181	181	149	149	137	137	128	128	184	230	106	106	220	228	169	169	94	107	233	233	102	102	183	185
678	Tg086	Madagascar	-	MDG71	-24.93	46.88	2011	H. Rasolofoarivao	P0Q	A1	x	A	210	212	102	102	181	181	136	149	132	132	128	128	228	228	106	106	220	220	169	169	94	94	233	247	98	102	129	185
679	Tg087	Madagascar	-	MDG71	-24.93	46.88	2011	H. Rasolofoarivao	P0Q	A1	x	A	212	212	102	102	181	181	147	149	137	137	128	128	184	232	106	106	220	230	169	169	94	107	233	233	102	102	127	183
680	Tg088	Madagascar	-	MDG71	-24.93	46.88	2011	H. Rasolofoarivao	P0Q	A1	x	A	210	212	102	102	181	181	136	147	132	137	128	128	184	228	106	106	228	230	169	169	107	107	233	233	102	102	129	181
681	Tg089	Madagascar	-	MDG71	-24.93	46.88	2011	H. Rasolofoarivao	P0Q	A1	x	A	210	214	96	102	181	181	147	149	137	137	128	128	184	230	106	106	220	220	169	169	94	107	233	239	102	102	129	183
682	Tg090	Madagascar	-	MDG71	-24.93	46.88	2011	H. Rasolofoarivao	P0Q	A1	x	A	212	214	102	102	181	181	147	147	132	133	128	128	184	184	106	106	230	230	169	169	94	94	235	249	102	102	181	183
683	Tg091	Madagascar	-	MDG71	-24.93	46.88	2011	H. Rasolofoarivao	P0Q	A1	x	A	210	210	102	102	181	181	136	149	132	133	128	128	184	184	106	106	220	230	169	169	94	94	233	239	98	102	129	181
684	Tg007	Madagascar	-	MDG72	-24.97	46.98	2011	H. Rasolofoarivao	P0Q	A1	x	A	210	210	96	102	181	181	149	149	137	139	128	128	184	184	106	106	NA	NA	169	169	94	94	NA	NA	102	102	181	187
685	Tg008	Madagascar	-	MDG72	-24.97	46.98	2011	H. Rasolofoarivao	P0Q	A1	x	A	212	212	96	102	181	181	136	147	132	137	128	128	184	184	106	106	230	230	169	169	94	94	233	233	98	102	129	179
686	Tg009	Madagascar	-	MDG72	-24.97	46.98	2011	H. Rasolofoarivao	P0Q	A1	x	A	210	212	92	102	181	181	136	147	132	137	128	128	184	184	106	106	230	230	165	169	94	94	NA	NA	102	102	131	133
687	Tg010	Madagascar	-	MDG72	-24.97	46.98	2011	H. Rasolofoarivao	P0Q	A1	x	A	210	212	96	102	181	181	136	149	132	132	128	130	184	184	106	106	230	230	169	169	107	107	233	247	102	102	129	179
688	Tg011	Madagascar	-	MDG72	-24.97	46.98	2011	H. Rasolofoarivao	P0Q	A1	x	A	210	212	96	102	181	181	136	149	132	133	128	128	184	184	106	106	220	220	169	169	94	107	233	233	102	102	129	177
689	Tg012	Madagascar	-	MDG72	-24.97	46.98	2011	H. Rasolofoarivao	P0Q	A1	x	A	212	214	102	102	175	181	136	136	133	133	128	128	184	232	106	106	230	230	169	169	107	107	239	239	102	102	129	179
690	Tg013	Madagascar	-	MDG72	-24.97	46.98	2011	H. Rasolofoarivao	P0Q	A1	x	A	210	210	96	102	181	181	149	149	132	137	128	128	232	234	106	106	220	230	169	169	107	107	233	239	102	102	129	187
691	Tg014	Madagascar	-	MDG72	-24.97	46.98	2011	H. Rasolofoarivao	P0Q	A1	x	A	210	214	96	102	175	181	136	149	132	133	128	128	184	230	106	106	230	232	169	169	94	94	239	247	102	102	129	183
692	Tg015	Madagascar	-	MDG72	-24.97	46.98	2011	H. Rasolofoarivao	P0Q	A1	x	A	210	210	96	102	181	181	136	147	137	137	128	128	184	228	106	110	220	228	169	169	94	107	233	237	102	102	127	179
693	Tg016	Madagascar	-	MDG72	-24.97	46.98	2011	H. Rasolofoarivao	P0Q	A1	x	A	210	212	102	102	181	181	136	149	132	133	128	128	184	230	106	106	228	230	169	169	107	107	239	239	102	102	177	179
694	Tg001	Madagascar	-	MDG73	-25.01	46.99	2011	H. Rasolofoarivao	P0Q	A1	A1_MAD3	A	210	210	96	102	181	181	149	149	133	137	128	128	176	184	106	106	230	230	169	169	94	94	239	247	98	102	129	183
695	Tg002	Madagascar	-	MDG73	-25.01	46.99	2011	H. Rasolofoarivao	P0Q	A1	A1_MAD3	A	210	212	96	96	181	181	136	136	137	137	128	128	184	228	106	106	218	220	169	169	94	94	NA	NA	102	102	NA	NA
696	Tg003	Madagascar	-	MDG73	-25.01	46.99	2011	H. Rasolofoarivao	P0Q	A1	A1_MAD16	A	212	212	102	102	181	181	147	149	133	137	128	128	228	234	106	106	220	230	169	169	94	94	233	233	96	98	129	129
697	Tg004	Madagascar	-	MDG73	-25.01	46.99	2011	H. Rasolofoarivao	P0Q	A1	x	A	210	210	96	102	181	181	136	147	133	133	128	128	184	184	106	106	220	230	169	169	94	107	239	247	102	102	127	129
698	Tg005	Madagascar	-	MDG73	-25.01	46.99	2011	H. Rasolofoarivao	P0Q	A1	x	A	210	212	96	102	181	181	136	149	132	132	128	128	184	232	106	110	220	220	169	169	107	107	NA	NA	102	102	129	179
699	Tg006	Madagascar	-	MDG73	-25.01	46.99	2011	H. Rasolofoarivao	P0Q	A1	x	A	212	214	102	102	175	181	136	149	133	137	128	128	NA	NA	106	106	218	230	169	169	94	107	239	239	98	102	129	181
700	Tg039	Madagascar	-	MDG74	-25.01	46.89	2011	H. Rasolofoarivao	P0Q	A1	A1_MAD3	A	210	210	96	102	181	181	136	136	133	133	128	128	184	232	106	106	232	232	169	169	94	107	233	237	102	102	127	181
701	Tg041	Madagascar	-	MDG74	-25.01	46.89	2011	H. Rasolofoarivao	P0Q	A1	A1_MAD3	A	210	212	102	102	181	181	149	149	132	133	128	128	184	232	106	106	230	232	169	169	94	94	233	233	102	102	129	129
702	Tg042	Madagascar	-	MDG74	-25.01	46.89	2011	H. Rasolofoarivao	P0Q	A1	A1_MAD9	A	212	212	96	102	181	181	149	149	132	133	128	128	184	232	106	106	228	230	169	169	94	94	233	233	102	102	127	129
703	Tg040	Madagascar	-	MDG74	-25.01	46.89	2011	H. Rasolofoarivao	P0Q	A1	x	A	210	214	96	102	181	181	136	136	133	133	128	128	210	234	106	106	220	230	169	169	94	94	233	237	102	102	127	179
704	Tg043	Madagascar	-	MDG74	-25.01	46.89	2011	H. Rasolofoarivao	P0Q	A1	x	A	212	214	96	102	181	181	136	147	133	133	128	128	184	230	106	106	228	228	169	169	94	94	233	235	102	102	129	183
705	Tg044	Madagascar	-	MDG74	-25.01	46.89	2011	H. Rasolofoarivao	P0Q	A1	x	A	210	210	96	102	181	181	147	147	133	137	128	128	184	184	106	106	220	234	169	169	94	107	233	239	102	102	177	183
706	Tg045	Madagascar	-	MDG74	-25.01	46.89	2011	H. Rasolofoarivao	P0Q	A1	x	A	210	210	96	102	181	181	136	147	137	137	128	128	184	236	106	106	230	230	169	169	107	107	239	239	102	102	127	129
707	Tg046	Madagascar	-	MDG74	-25.01	46.89	2011	H. Rasolofoarivao	P0Q	A1	x	A	210	210	96	102	181	181	147	149	132	133	126	128	230	232	106	106	228	230	169	169	94	107	233	235	102	102	181	183
708	Tg047	Madagascar	-	MDG74	-25.01	46.89	2011	H. Rasolofoarivao	P0Q	A1	x	A	210	210	96	102	181	181	136	149	133	137	128	128	184	230	106	106	220	220	169	169	94	94	233	233	102	102	129	179
709	Tg048	Madagascar	-	MDG74	-25.01	46.89	2011	H. Rasolofoarivao	P0Q	A1	x	A	NA	NA	96	96	NA	NA	136	149	132	137	126	126	184	230	106	106	220	230	169	169	94	94	235	235	98	102	129	181
710	Tg049	Madagascar	-	MDG74	-25.01	46.89	2011	H. Rasolofoarivao	P0Q	A1	x	A	210	212	102	102	181	181	147	149	133	137	128	128	184	184	106	106	NA	NA	169	169	94	107	233	233	102	102	127	129
711	Tg050	Madagascar	-	MDG74	-25.01	46.89	2011	H. Rasolofoarivao	P0Q	A1	x	A	212	212	102	102	181	181	136	147	137	137	128	128	184	184	106	106	220	230	169	169	94	107	233	247	102	102	181	181
712	Tg051	Madagascar	-	MDG74	-25.01	46.89	2011	H. Rasolofoarivao	P0Q	A1	x	A	210	210	96	102	181	181	147	149	133	133	128	128	184	236	106	106	230	232	169	169	94	107	233	239	102	102	179	187
713	Tg052	Madagascar	-	MDG74	-25.01	46.89	2011	H. Rasolofoarivao	P0Q	A1	x	A	210	212	102	102	175	181	136	149	133	137	128	128	184	184	106	106	220	230	169	169	94	107	235	239	102	102	129	129
714	Tg053	Madagascar	-	MDG74	-25.01	46.89	2011	H. Rasolofoarivao	P0Q	A1	x	A	210	212	96	96	181	181	136	149	133	137	128	130	184	184	106	106	220	230	169	169	94	107	231	239	102	102	129	179
715	Tg054	Madagascar	-	MDG74	-25.01	46.89	2011	H. Rasolofoarivao	P0Q	A1	x	A	210	212	102	102	181	181	136	149	132	137	128	128	184	234	106	106	220	230	169	169	94	94	233	239	98	102	129	179
716	Tg055	Madagascar	-	MDG74	-25.01	46.89	2011	H. Rasolofoarivao	P0Q	A1	x	A	210	212	102	102	181	183	136	147	133	137	128	128	226	232	106	106	230	230	169	169	94	94	233	239	102	102	129	181
717	Tg056	Madagascar	-	MDG74	-25.01	46.89	2011	H. Rasolofoarivao	P0Q	A1	x	A	210	210	96	102	181	181	136	136	133	137	128	128	230	234	106	106	220	228	169	169	94	107	233	233	102	102	181	183
718	Tg058	Madagascar	-	MDG74	-25.01	46.89	2011	H. Rasolofoarivao	P0Q	A1	x	A	210	212	96	102	181	181	136	149	133	133	128	128	230	230	106	106	220	230	169	169	94	107	233	233	102	102	129	181
719	Tg059	Madagascar	-	MDG74	-25.01	46.89	2011	H. Rasolofoarivao	P0Q	A1	x	A	210	210	96	102	181	181	136	136	137	137	128	130	184	184	106	106	228	230	169	169	107	107	233	247	102	102	127	179
720	Tg060	Madagascar	-	MDG74	-25.01	46.89	2011	H. Rasolofoarivao	P0Q	A1	x	A	210	212	102	102	181	181	136	147	133	137	128	128	176	230	106	106	220	230	169	169	94	107	233	233	98	102	129	181
721	Tg037	Madagascar	-	MDG75	-25.05	46.77	2011	H. Rasolofoarivao	P0Q	A1	A1_MAD3	A	210	212	96	102	181	181	136	149	133	137	128	128	230	232	106	106	228	230	169	169	94	94	233	239	102	102	129	181
722	Tg038	Madagascar	-	MDG75	-25.05	46.77	2011	H. Rasolofoarivao	P0Q	A1	A1_MAD3	A	210	212	102	102	175	181	136	136	133	133	128	128	184	184	106	106	230	232	169	169	94	107	241	249	102	102	129	183
723	Tg026	Madagascar	-	MDG75	-25.05	46.77	2011	H. Rasolofoarivao	P0Q	A1	x	A	210	212	96	102	181	181	136	149	137	137	128	128	184	232	106	106	228	230	169	169	94	94	233	233	102	102	129	181
724	Tg027	Madagascar	-	MDG75	-25.05	46.77	2011	H. Rasolofoarivao	P0Q	A1	x	A	212	212	102	102	181	181	149	149	133	137	128	128	232	234	106	106	220	230	169	169	94	107	233	247	98	102	127	129
725	Tg028	Madagascar	-	MDG75	-25.05	46.77	2011	H. Rasolofoarivao	P0Q	A1	x	A	210	212	96	102	181	181	149	149	133	133	128	128	184	234	106	106	220	230	169	169	94	94	235	237	102	102	129	181
726	Tg029	Madagascar	-	MDG75	-25.05	46.77	2011	H. Rasolofoarivao	P0Q	A1	x	A	210	212	102	102	181	181	136	147	133	137	126	128	184	230	106	106	220	230	169	169	94	94	233	233	102	102	129	187
727	Tg030	Madagascar	-	MDG75	-25.05	46.77	2011	H. Rasolofoarivao	P0Q	A1	x	A	210	212	102	102	175	181	136	149	133	133	128	128	184	184	106	106	220	228	169	169	94	94	233	241	102	102	127	129
728	Tg031	Madagascar	-	MDG75	-25.05	46.77	2011	H. Rasolofoarivao	P0Q	A1	x	A	210	212	102	102	175	181	147	149	133	133	128	128	230	230	106	106	220	220	169	169	107	107	233	237	102	102	NA	NA
729	Tg032	Madagascar	-	MDG75	-25.05	46.77	2011	H. Rasolofoarivao	P0Q	A1	x	A	212	212	96	102	181	181	149	149	133	137	128	128	184	184	106	106	NA	NA	169	169	94	107	235	235	102	102	127	129
730	Tg033	Madagascar	-	MDG75	-25.05	46.77	2011	H. Rasolofoarivao	P0Q	A1	x	A	210	212	102	102	181	181	136	149	133	137	126	128	210	228	106	106	220	232	169	169	94	94	233	233	96	102	129	181
731	Tg034	Madagascar	-	MDG75	-25.05	46.77	2011	H. Rasolofoarivao	P0Q	A1	x	A	210	210	102	102	181	181	147	149	133	137	128	128	184	184	106	106	220	230	169	169	94	94	239	239	102	102	129	179
732	Tg035	Madagascar	-	MDG75	-25.05	46.77	2011	H. Rasolofoarivao	P0Q	A1	x	A	210	210	96	102	181	181	136	136	133	137	128	128	184	236	106	106	220	228	169	169	94	107	229	233	102	102	129	129
733	Tg036	Madagascar	-	MDG75	-25.05	46.77	2011	H. Rasolofoarivao	P0Q	A1	x	A	210	210	96	102	181	181	136	149	133	137	128	128	184	230	106	106	220	230	169	169	94	107	233	233	98	102	129	181
734	Tg061	Madagascar	-	MDG76	-25.19	46.1	2011	H. Rasolofoarivao	P0Q	A1	x	A	210	210	96	102	181	183	149	149	132	133	128	128	184	184	106	110	216	230	169	169	94	94	233	233	102	102	181	181
735	Tg062	Madagascar	-	MDG76	-25.19	46.1	2011	H. Rasolofoarivao	P0Q	A1	x	A	212	214	102	102	181	181	147	149	133	133	128	128	184	184	106	106	220	228	169	169	94	94	233	233	102	102	181	187
736	Tg063	Madagascar	-	MDG76	-25.19	46.1	2011	H. Rasolofoarivao	P0Q	A1	x	A	210	214	102	102	175	181	149	149	132	137	128	130	176	184	106	106	230	230	169	169	94	94	233	233	102	102	129	181
737	Tg064	Madagascar	-	MDG76	-25.19	46.1	2011	H. Rasolofoarivao	P0Q	A1	x	A	210	210	96	102	175	181	136	149	132	133	126	128	184	232	106	106	220	230	169	169	94	107	233	247	98	102	127	129
738	Tg065	Madagascar	-	MDG76	-25.19	46.1	2011	H. Rasolofoarivao	P0Q	A1	x	A	210	212	102	102	175	181	136	136	132	137	128	128	184	184	106	110	220	228	169	169	94	107	233	233	102	102	129	181
739	Tg066	Madagascar	-	MDG76	-25.19	46.1	2011	H. Rasolofoarivao	P0Q	A1	x	A	210	210	96	102	181	181	149	149	133	133	128	128	184	234	106	106	220	220	169	169	94	107	233	233	98	98	127	129
740	Tg067	Madagascar	-	MDG76	-25.19	46.1	2011	H. Rasolofoarivao	P0Q	A1	x	A	210	212	96	96	181	181	149	149	133	137	128	128	184	184	106	110	216	228	169	169	94	107	233	247	102	102	179	185
741	Tg068	Madagascar	-	MDG76	-25.19	46.1	2011	H. Rasolofoarivao	P0Q	A1	x	A	212	212	96	102	181	181	136	136	137	137	128	128	184	234	106	106	220	230	169	169	94	94	233	235	102	102	129	185
742	Tg069	Madagascar	-	MDG76	-25.19	46.1	2011	H. Rasolofoarivao	P0Q	A1	x	A	210	210	96	102	181	181	136	136	133	133	128	128	184	184	106	106	228	236	NA	NA	NA	NA	NA	NA	NA	NA	NA	NA
743	Tg070	Madagascar	-	MDG76	-25.19	46.1	2011	H. Rasolofoarivao	P0Q	A1	x	A	212	214	102	102	181	181	147	149	133	133	128	128	184	184	106	106	220	232	169	169	94	94	247	247	102	102	127	129
744	Tg071	Madagascar	-	MDG76	-25.19	46.1	2011	H. Rasolofoarivao	P0Q	A1	x	A	212	214	102	102	181	181	147	149	133	137	128	128	184	230	106	106	228	232	169	169	94	107	233	233	98	102	181	181
745	Tg072	Madagascar	-	MDG76	-25.19	46.1	2011	H. Rasolofoarivao	P0Q	A1	x	A	210	214	96	102	175	181	149	149	133	137	128	128	184	232	106	106	230	232	169	169	94	94	233	233	96	102	129	183
746	Tg073	Madagascar	-	MDG76	-25.19	46.1	2011	H. Rasolofoarivao	P0Q	A1	x	A	210	212	102	102	181	181	147	147	133	133	128	128	184	234	106	106	230	232	169	169	94	94	233	247	102	102	127	181
747	Tg074	Madagascar	-	MDG76	-25.19	46.1	2011	H. Rasolofoarivao	P0Q	A1	x	A	210	212	102	102	181	181	149	149	132	137	128	128	184	232	106	106	220	232	169	169	94	107	233	233	102	102	129	129
748	Tg075	Madagascar	-	MDG76	-25.19	46.1	2011	H. Rasolofoarivao	P0Q	A1	x	A	212	212	102	102	181	181	147	149	133	133	128	128	184	230	106	110	228	230	169	169	94	94	247	247	98	102	129	181
749	ISM_01	Madagascar	-	MDG77	-16.905636	49.904939	2012	H. Delatte	P0Q	A1	x	A	210	210	102	102	181	181	136	147	132	137	128	128	228	228	106	106	220	230	169	169	94	94	233	233	96	98	183	185
750	ISM_02	Madagascar	-	MDG77	-16.905636	49.904939	2012	H. Delatte	P0Q	A1	x	A	210	210	96	102	181	181	136	136	133	137	128	128	184	234	106	106	230	232	169	169	94	94	233	235	102	102	177	183
751	ISM_03	Madagascar	-	MDG77	-16.905636	49.904939	2012	H. Delatte	P0Q	A1	A1_MAD3	A	210	212	102	102	175	181	136	147	133	133	128	128	184	184	106	106	230	232	169	169	94	94	239	239	102	102	177	183
752	ISM_04	Madagascar	-	MDG77	-16.905636	49.904939	2012	H. Delatte	P0Q	A1	A1_MAD3	A	212	214	96	102	181	181	136	136	132	133	128	128	184	230	106	106	220	230	169	169	94	94	233	235	96	102	177	179
753	ISM_05	Madagascar	-	MDG77	-16.905636	49.904939	2012	H. Delatte	P0Q	A1	x	A	210	210	102	102	181	181	136	149	133	133	128	128	226	230	106	106	220	220	169	169	94	94	233	235	98	102	129	183
754	ISM_06	Madagascar	-	MDG77	-16.905636	49.904939	2012	H. Delatte	P0Q	A1	x	A	210	210	102	102	181	181	149	149	133	133	128	128	184	184	106	106	220	230	169	169	94	94	235	239	102	102	179	183
755	ISM_07	Madagascar	-	MDG77	-16.905636	49.904939	2012	H. Delatte	P0Q	A1	A1_MAD3	A	210	210	96	102	181	181	136	136	132	133	128	130	184	226	106	106	220	220	169	169	94	94	235	235	102	102	179	183
756	ISM_08	Madagascar	-	MDG77	-16.905636	49.904939	2012	H. Delatte	P0Q	A1	A1_MAD3	A	210	210	102	102	175	181	136	147	132	133	128	128	184	226	106	106	220	220	169	169	94	94	233	235	102	102	179	179
757	ISM_09	Madagascar	-	MDG77	-16.905636	49.904939	2012	H. Delatte	P0Q	A1	A1_MAD3	A	210	210	96	102	181	181	136	149	132	133	128	128	184	184	106	106	220	230	169	169	94	94	235	235	102	102	183	185
758	ISM_10	Madagascar	-	MDG77	-16.905636	49.904939	2012	H. Delatte	P0Q	A1	x	A	210	212	96	102	143	181	149	149	133	137	128	128	184	232	106	106	230	230	169	169	94	94	233	239	102	102	183	185
759	ISM_11	Madagascar	-	MDG77	-16.905636	49.904939	2012	H. Delatte	P0Q	A1	x	A	210	210	96	96	179	181	149	149	133	137	128	128	230	230	106	106	220	230	169	169	94	94	233	233	102	102	183	185
760	ISM_12	Madagascar	-	MDG77	-16.905636	49.904939	2012	H. Delatte	P0Q	A1	x	A	210	212	96	102	181	181	147	149	132	137	128	128	228	232	106	106	220	230	169	169	94	94	233	239	102	102	129	177
761	AF084.1	Madagascar	-	MDG78	-16.1	49.3	1996-07-01	P. Franck	P0Q	A1	x	A	210	214	96	96	175	175	147	149	137	137	128	128	234	238	106	106	222	222	169	169	94	94	235	235	102	102	129	129
762	AF084.2	Madagascar	-	MDG78	-16.1	49.3	1996-07-01	P. Franck	P0Q	A1	x	A	210	214	96	96	175	181	147	149	133	137	128	128	184	238	106	106	222	222	169	169	94	94	235	235	98	102	129	183
763	AF085.1	Madagascar	-	MDG78	-16.1	49.3	1996-07-01	P. Franck	P0Q	A1	A1_MAD3	A	212	212	102	102	181	181	147	149	133	137	126	128	184	184	106	110	222	232	169	169	94	94	235	235	102	102	129	183
764	AF085.2	Madagascar	-	MDG78	-16.1	49.3	1996-07-01	P. Franck	P0Q	A1	x	A	210	212	96	102	181	181	149	149	137	137	128	128	184	238	106	106	222	232	169	169	94	94	235	235	96	102	129	129
765	AF086.1	Madagascar	-	MDG78	-16.1	49.3	1996-07-01	P. Franck	P0Q	A1	x	A	210	214	102	102	181	181	149	149	137	137	128	128	184	234	106	106	230	230	169	169	94	108	243	243	102	102	181	183
766	AF086.2	Madagascar	-	MDG78	-16.1	49.3	1996-07-01	P. Franck	P0Q	A1	x	A	210	212	96	102	181	181	136	149	137	137	128	128	232	232	106	106	220	234	169	169	94	108	235	243	98	102	181	183
767	AF087.1	Madagascar	-	MDG78	-16.1	49.3	1996-07-01	P. Franck	P0Q	A1	x	A	210	210	96	102	181	181	149	149	132	133	128	128	184	232	106	106	228	230	169	169	94	108	237	247	102	102	127	129
768	AF087.2	Madagascar	-	MDG78	-16.1	49.3	1996-07-01	P. Franck	P0Q	A1	x	A	210	212	96	102	181	183	136	149	133	137	128	194	184	236	106	106	228	230	169	169	94	108	237	247	102	102	129	179
769	AF088.1	Madagascar	-	MDG78	-16.1	49.3	1996-07-01	P. Franck	P0Q	A1	A1_MAD3	A	210	210	102	102	175	181	136	136	137	137	128	128	184	184	106	106	230	234	169	169	94	108	237	251	102	102	129	183
770	AF088.2	Madagascar	-	MDG78	-16.1	49.3	1996-07-01	P. Franck	P0Q	A1	x	A	210	210	102	102	181	181	136	149	133	137	128	128	232	236	106	106	220	234	169	169	94	94	237	237	98	102	129	129
771	AF089.1	Madagascar	-	MDG78	-16.1	49.3	1996-07-01	P. Franck	P0Q	A1	x	A	210	214	102	102	181	181	136	147	132	137	128	128	188	232	106	106	220	234	169	169	94	94	237	243	96	102	NA	NA
772	AF089.2	Madagascar	-	MDG78	-16.1	49.3	1996-07-01	P. Franck	P0Q	A1	x	A	210	214	102	102	181	181	149	149	132	133	NA	NA	184	232	106	106	230	234	169	169	108	108	237	243	102	102	129	129
773	AF090.1	Madagascar	-	MDG78	-16.1	49.3	1996-07-01	P. Franck	P0Q	A1	A1_MAD3	A	212	214	102	102	181	181	136	136	132	137	126	128	184	230	106	110	220	220	169	169	94	94	237	237	102	102	129	183
774	AF090.2	Madagascar	-	MDG78	-16.1	49.3	1996-07-01	P. Franck	P0Q	A1	x	A	214	214	102	102	181	183	147	149	137	137	128	128	184	232	106	106	220	226	169	169	94	94	237	245	102	102	127	179
775	AF091.1	Madagascar	-	MDG78	-16.1	49.3	1996-07-01	P. Franck	P0Q	A1	x	A	210	210	102	102	181	181	149	149	133	137	128	128	184	232	106	106	226	230	169	169	94	108	237	243	102	102	129	171
776	AF091.2	Madagascar	-	MDG78	-16.1	49.3	1996-07-01	P. Franck	P0Q	A1	A1_MAD3	A	210	212	102	102	175	181	136	136	132	137	126	128	178	184	106	110	230	230	169	169	95	95	237	243	102	102	129	183
777	AF092.1	Madagascar	-	MDG78	-16.1	49.3	1996-07-01	P. Franck	P0Q	A1	x	A	210	214	102	102	181	181	136	149	133	137	128	128	184	232	106	106	220	230	169	169	108	108	237	237	98	102	183	183
778	AF092.2	Madagascar	-	MDG78	-16.1	49.3	1996-07-01	P. Franck	P0Q	A1	x	A	212	214	102	102	181	181	149	149	133	137	128	128	232	232	106	106	230	230	169	169	94	108	237	237	102	102	127	129
779	AF093.1	Madagascar	-	MDG78	-16.1	49.3	1996-07-01	P. Franck	P0Q	A1	x	A	210	212	96	102	181	181	136	149	133	137	128	128	184	230	106	106	220	230	169	169	94	94	237	237	102	102	129	129
780	AF093.2	Madagascar	-	MDG78	-16.1	49.3	1996-07-01	P. Franck	P0Q	A1	x	A	210	212	96	102	181	181	136	149	133	137	128	198	184	230	106	106	220	230	169	169	94	94	237	237	102	102	129	183
781	AF094.1	Madagascar	-	MDG78	-16.1	49.3	1996-07-01	P. Franck	P0Q	A1	A1_MAD3	A	210	210	102	102	181	181	136	149	132	133	128	196	184	232	106	110	220	230	169	169	94	94	233	247	102	102	181	181
782	AF094.2	Madagascar	-	MDG78	-16.1	49.3	1996-07-01	P. Franck	P0Q	A1	x	A	212	214	102	102	181	181	136	149	132	133	128	198	184	232	106	106	220	230	169	169	94	94	233	247	102	102	129	181
783	AF095.1	Madagascar	-	MDG78	-16.1	49.3	1996-07-01	P. Franck	P0Q	A1	x	A	212	212	102	102	181	181	140	149	133	137	128	128	184	184	106	106	228	230	169	169	94	107	233	233	102	102	129	129
784	AF095.2	Madagascar	-	MDG78	-16.1	49.3	1996-07-01	P. Franck	P0Q	A1	x	A	210	210	102	102	181	181	136	147	132	133	128	128	184	184	106	106	220	228	169	169	94	107	235	239	102	102	129	183
785	AF096.1	Madagascar	-	MDG78	-16.1	49.3	1996-07-01	P. Franck	P0Q	A1	A1_MAD3	A	204	214	102	102	181	181	147	149	132	133	128	128	184	232	106	106	220	230	169	169	94	107	237	239	102	102	127	129
786	AF096.2	Madagascar	-	MDG78	-16.1	49.3	1996-07-01	P. Franck	P0Q	A1	x	A	210	212	102	102	181	181	147	149	132	137	128	128	184	232	106	106	220	220	169	169	94	107	247	247	102	102	127	181
787	AF006	Madagascar	-	MDG79	-17	47	1998-05-15	P. Franck	P0Q	A1	A1_MAD3	A	210	212	102	102	181	183	136	149	133	137	128	128	184	184	106	106	222	230	169	169	94	94	235	235	102	102	129	181
788	AF097.1	Madagascar	-	MDG80	-18.55	47.47	1997-07-01	P. Franck	P0Q	A1	x	A	210	212	92	102	181	181	136	149	133	133	128	198	184	184	106	106	230	232	169	169	94	94	239	247	102	102	129	187
789	AF097.2	Madagascar	-	MDG80	-18.55	47.47	1997-07-01	P. Franck	P0Q	A1	x	A	210	210	102	102	181	181	149	149	133	137	128	128	184	234	106	106	230	230	169	169	94	94	241	247	102	102	181	187
790	AF098.1	Madagascar	-	MDG80	-18.55	47.47	1997-07-01	P. Franck	P0Q	A1	x	A	210	214	102	102	181	185	136	149	133	137	128	192	184	230	106	106	220	230	169	169	94	94	233	233	102	102	127	177
791	AF098.2	Madagascar	-	MDG80	-18.55	47.47	1997-07-01	P. Franck	P0Q	A1	x	A	210	214	92	102	181	185	136	149	137	137	128	128	184	230	106	106	220	230	169	169	94	94	233	233	102	102	177	179
792	AF099.1	Madagascar	-	MDG80	-18.55	47.47	1997-07-01	P. Franck	P0Q	A1	x	A	212	212	96	102	181	181	147	149	133	133	128	128	184	218	106	106	220	230	169	169	94	107	233	233	102	102	129	181
793	AF099.2	Madagascar	-	MDG80	-18.55	47.47	1997-07-01	P. Franck	P0Q	A1	x	A	212	212	96	102	181	181	147	149	133	137	128	128	184	184	106	106	218	230	169	169	94	94	239	249	102	102	127	181
794	AF100.1	Madagascar	-	MDG80	-18.55	47.47	1997-07-01	P. Franck	P0Q	A1	A1_MAD3	A	214	214	102	102	175	181	136	149	133	137	128	200	184	228	106	110	220	230	169	169	94	107	239	247	102	102	127	129
795	AF100.2	Madagascar	-	MDG80	-18.55	47.47	1997-07-01	P. Franck	P0Q	A1	x	A	210	214	96	102	181	181	136	147	133	137	128	128	184	184	106	110	232	232	169	169	107	107	239	247	102	102	129	179
796	AF101.1	Madagascar	-	MDG80	-18.55	47.47	1997-07-01	P. Franck	P0Q	A1	x	A	212	212	102	102	181	181	147	149	137	137	128	130	184	240	106	106	220	230	169	169	94	107	233	239	102	102	127	179
797	AF101.2	Madagascar	-	MDG80	-18.55	47.47	1997-07-01	P. Franck	P0Q	A1	x	A	210	210	96	102	181	181	136	149	133	133	126	128	184	184	106	106	220	230	169	169	94	94	233	239	102	102	181	187
798	AF102.1	Madagascar	-	MDG80	-18.55	47.47	1997-07-01	P. Franck	P0Q	A1	x	A	210	210	102	102	181	181	136	147	133	137	128	130	184	242	106	106	220	230	169	169	94	94	233	247	102	102	129	183
799	AF102.2	Madagascar	-	MDG80	-18.55	47.47	1997-07-01	P. Franck	P0Q	A1	x	A	210	212	102	102	181	181	136	147	137	137	128	128	184	232	106	106	228	232	169	169	94	107	231	239	98	102	181	181
800	AF103.1	Madagascar	-	MDG81	-18.55	47.31	1997-07-01	P. Franck	P0Q	A1	x	A	210	212	102	102	181	181	147	149	133	137	128	128	184	232	106	106	230	230	169	169	94	107	233	239	102	102	177	183
801	AF103.2	Madagascar	-	MDG81	-18.55	47.31	1997-07-01	P. Franck	P0Q	A1	A1_MAD3	A	210	210	96	102	175	181	136	149	137	137	128	128	230	230	106	106	220	230	169	169	94	94	247	247	102	102	129	177
802	AF104.1	Madagascar	-	MDG81	-18.55	47.31	1997-07-01	P. Franck	P0Q	A1	x	A	210	210	102	102	175	181	136	147	137	137	128	128	184	184	106	106	220	230	169	169	94	94	239	247	102	102	129	129
803	AF104.2	Madagascar	-	MDG81	-18.55	47.31	1997-07-01	P. Franck	P0Q	A1	x	A	210	214	102	102	175	175	147	147	137	137	128	128	184	232	106	106	220	230	169	169	94	94	239	239	102	102	179	183
804	AF105.1	Madagascar	-	MDG81	-18.55	47.31	1997-07-01	P. Franck	P0Q	A1	x	A	212	214	102	102	181	181	136	149	133	137	128	128	184	184	106	106	230	232	169	169	94	107	233	233	98	102	179	181
805	AF105.2	Madagascar	-	MDG81	-18.55	47.31	1997-07-01	P. Franck	P0Q	A1	x	A	212	212	102	102	181	181	136	149	133	137	128	128	184	184	106	106	230	232	169	169	94	94	233	233	98	102	177	179
806	AF106.1	Madagascar	-	MDG81	-18.55	47.31	1997-07-01	P. Franck	P0Q	A1	x	A	208	210	102	102	175	181	136	136	137	137	128	204	184	230	106	106	230	230	169	169	94	107	233	239	98	102	127	179
807	AF106.2	Madagascar	-	MDG81	-18.55	47.31	1997-07-01	P. Franck	P0Q	A1	x	A	210	210	102	102	181	181	147	149	133	133	128	204	184	184	106	106	228	230	169	169	94	107	233	233	102	102	141	141
808	AF107.1	Madagascar	-	MDG81	-18.55	47.31	1997-07-01	P. Franck	P0Q	A1	x	A	210	210	102	102	175	181	136	149	133	137	128	128	230	242	106	106	230	230	169	169	94	94	247	247	102	102	129	129
809	AF107.2	Madagascar	-	MDG81	-18.55	47.31	1997-07-01	P. Franck	P0Q	A1	x	A	210	210	102	102	181	185	136	149	133	137	128	128	230	230	106	106	230	230	169	169	94	94	233	247	102	102	129	181
810	AF108.1	Madagascar	-	MDG81	-18.55	47.31	1997-07-01	P. Franck	P0Q	A1	x	A	210	212	96	102	181	181	136	136	137	137	128	188	230	230	106	110	220	230	169	169	94	107	239	239	102	102	129	181
811	AF108.2	Madagascar	-	MDG81	-18.55	47.31	1997-07-01	P. Franck	P0Q	A1	A1_MAD3	A	212	214	102	102	181	181	136	136	132	133	128	128	184	184	106	110	220	230	169	169	94	107	235	239	102	102	129	129
812	AF109.1	Madagascar	-	MDG81	-18.55	47.31	1997-07-01	P. Franck	P0Q	A1	x	A	212	212	96	102	175	181	136	147	133	137	128	128	184	228	106	106	220	220	169	169	94	94	233	247	102	102	129	181
813	AF109.2	Madagascar	-	MDG81	-18.55	47.31	1997-07-01	P. Franck	P0Q	A1	x	A	210	212	96	102	181	181	149	149	133	133	128	128	184	230	106	106	220	230	169	169	94	107	239	247	102	102	129	181
814	AF110.1	Madagascar	-	MDG81	-18.55	47.31	1997-07-01	P. Franck	P0Q	A1	x	A	210	212	96	102	181	181	136	136	137	137	128	128	184	216	106	106	230	232	169	169	94	107	233	233	102	102	129	181
815	AF110.2	Madagascar	-	MDG81	-18.55	47.31	1997-07-01	P. Franck	P0Q	A1	x	A	210	214	96	102	175	181	136	136	133	133	128	128	184	228	106	106	220	230	169	169	94	107	241	247	102	102	129	141
816	AF111.1	Madagascar	-	MDG81	-18.55	47.31	1997-07-01	P. Franck	P0Q	A1	x	A	210	212	102	102	175	181	136	136	133	133	128	200	184	184	106	106	230	230	169	169	94	107	233	239	102	102	179	181
817	AF111.2	Madagascar	-	MDG81	-18.55	47.31	1997-07-01	P. Franck	P0Q	A1	x	A	212	214	102	102	175	181	136	147	133	133	128	194	184	184	106	106	230	230	169	169	94	94	239	239	102	102	129	181
818	AF112.1	Madagascar	-	MDG81	-18.55	47.31	1997-07-01	P. Franck	P0Q	A1	x	A	210	210	102	102	181	181	147	149	133	137	126	130	184	230	106	106	232	232	169	169	94	107	233	247	102	102	129	129
819	AF112.2	Madagascar	-	MDG81	-18.55	47.31	1997-07-01	P. Franck	P0Q	A1	x	A	210	210	102	102	181	181	136	147	137	137	128	128	184	184	106	106	220	230	169	169	94	94	233	239	102	102	177	181
820	AF113.1	Madagascar	-	MDG81	-18.55	47.31	1997-07-01	P. Franck	P0Q	A1	A1_MAD3	A	210	210	102	102	181	181	147	149	133	133	126	128	184	230	106	106	228	230	169	169	94	107	233	239	98	102	129	183
821	AF113.2	Madagascar	-	MDG81	-18.55	47.31	1997-07-01	P. Franck	P0Q	A1	x	A	212	214	102	102	181	181	147	149	133	133	128	176	184	230	106	106	230	232	169	169	94	94	239	247	98	102	129	129
822	AF114.1	Madagascar	-	MDG81	-18.55	47.31	1997-07-01	P. Franck	P0Q	A1	x	A	210	210	102	102	181	185	147	147	132	133	128	128	232	232	106	106	230	230	169	169	94	107	239	239	102	102	183	183
823	AF114.2	Madagascar	-	MDG81	-18.55	47.31	1997-07-01	P. Franck	P0Q	A1	x	A	212	212	102	102	181	185	147	149	133	137	128	128	184	184	106	106	230	230	169	169	94	94	233	239	102	102	177	185
824	AF115.1	Madagascar	-	MDG81	-18.55	47.31	1997-07-01	P. Franck	P0Q	A1	x	A	210	210	96	102	181	181	149	149	137	137	128	130	184	232	106	106	220	226	169	169	94	107	231	239	102	102	171	177
825	AF115.2	Madagascar	-	MDG81	-18.55	47.31	1997-07-01	P. Franck	P0Q	A1	x	A	210	212	102	102	181	181	136	149	137	137	128	128	180	184	106	106	220	230	169	169	94	107	231	247	102	102	129	177
826	AF116.1	Madagascar	-	MDG81	-18.55	47.31	1997-07-01	P. Franck	P0Q	A1	x	A	210	210	102	102	181	181	136	136	137	137	128	128	184	184	106	106	220	220	169	169	94	107	233	233	102	102	127	177
827	AF116.2	Madagascar	-	MDG81	-18.55	47.31	1997-07-01	P. Franck	P0Q	A1	x	A	214	214	102	102	181	181	136	147	133	133	128	128	184	234	106	106	220	220	169	169	94	107	233	241	102	102	129	181
828	AF117.1	Madagascar	-	MDG81	-18.55	47.31	1997-07-01	P. Franck	P0Q	A1	x	A	210	212	102	102	175	181	147	149	137	137	128	128	184	230	106	106	220	226	169	169	94	94	233	239	98	102	129	181
829	AF117.2	Madagascar	-	MDG81	-18.55	47.31	1997-07-01	P. Franck	P0Q	A1	x	A	210	210	102	102	181	181	136	147	133	133	128	128	184	184	106	106	226	230	169	169	94	94	233	233	102	102	129	183
830	AF118.1	Madagascar	-	MDG81	-18.55	47.31	1997-07-01	P. Franck	P0Q	A1	x	A	210	210	102	102	181	181	136	149	133	137	128	128	184	230	106	106	220	228	169	169	107	107	233	233	102	102	127	129
831	AF118.2	Madagascar	-	MDG81	-18.55	47.31	1997-07-01	P. Franck	P0Q	A1	x	A	210	214	102	102	181	181	136	149	137	137	128	128	184	184	106	106	228	230	169	169	94	107	233	233	102	102	127	129
832	AF119.1	Madagascar	-	MDG81	-18.55	47.31	1997-07-01	P. Franck	P0Q	A1	x	A	210	212	92	102	175	181	147	149	133	133	128	128	184	184	106	106	220	232	169	169	94	94	233	247	102	102	181	183
833	AF119.2	Madagascar	-	MDG81	-18.55	47.31	1997-07-01	P. Franck	P0Q	A1	x	A	210	210	96	102	181	181	147	149	133	133	128	128	184	184	106	106	220	232	169	169	94	107	233	233	102	102	181	181
834	AF120.1	Madagascar	-	MDG81	-18.55	47.31	1997-07-01	P. Franck	P0Q	A1	x	A	210	212	96	102	175	181	136	149	133	137	128	128	184	228	106	106	220	230	169	169	94	94	233	247	102	102	183	185
835	AF120.2	Madagascar	-	MDG81	-18.55	47.31	1997-07-01	P. Franck	P0Q	A1	x	A	210	212	96	102	175	175	136	136	137	137	128	128	184	184	106	106	220	230	169	169	94	94	241	247	102	102	141	185
836	AF121.1	Madagascar	-	MDG81	-18.55	47.31	1997-07-01	P. Franck	P0Q	A1	x	A	210	210	102	102	181	181	136	136	133	137	128	194	184	230	106	106	220	230	169	169	94	94	233	245	102	102	129	129
837	AF121.2	Madagascar	-	MDG81	-18.55	47.31	1997-07-01	P. Franck	P0Q	A1	x	A	210	210	102	102	181	181	136	136	133	133	128	194	184	230	106	106	220	230	169	169	94	94	239	247	102	102	129	183
838	AF122.1	Madagascar	-	MDG81	-18.55	47.31	1997-07-01	P. Franck	P0Q	A1	A1_MAD3	A	210	212	96	102	175	181	147	147	133	133	128	128	232	234	106	106	230	230	169	169	94	94	233	233	96	102	141	181
839	AF122.2	Madagascar	-	MDG81	-18.55	47.31	1997-07-01	P. Franck	P0Q	A1	A1_MAD3	A	210	212	96	102	181	181	147	149	133	133	128	176	232	232	106	106	220	230	169	169	94	94	233	233	102	102	183	185
840	AF123.1	Madagascar	-	MDG81	-18.55	47.31	1997-07-01	P. Franck	P0Q	A1	x	A	210	214	102	102	175	181	136	147	132	137	128	128	184	242	106	106	220	232	169	169	94	107	239	245	102	102	129	129
841	AF123.2	Madagascar	-	MDG81	-18.55	47.31	1997-07-01	P. Franck	P0Q	A1	x	A	210	210	96	102	181	181	136	149	132	133	128	128	180	184	106	106	230	232	169	169	94	107	239	247	102	102	129	177
842	AF124.1	Madagascar	-	MDG81	-18.55	47.31	1997-07-01	P. Franck	P0Q	A1	x	A	210	212	96	102	175	181	147	149	133	133	128	128	228	232	106	106	220	230	169	169	94	107	233	247	102	102	181	185
843	AF124.2	Madagascar	-	MDG81	-18.55	47.31	1997-07-01	P. Franck	P0Q	A1	x	A	210	212	96	102	181	181	147	149	132	135	128	128	184	232	106	106	220	230	169	169	94	107	239	247	102	102	127	181
844	AF125.1	Madagascar	-	MDG81	-18.55	47.31	1997-07-01	P. Franck	P0Q	A1	x	A	210	210	102	102	181	181	147	149	132	137	128	128	184	230	106	106	230	230	169	169	94	94	233	239	102	102	129	183
845	AF125.2	Madagascar	-	MDG81	-18.55	47.31	1997-07-01	P. Franck	P0Q	A1	x	A	210	214	102	102	175	181	136	147	132	133	128	128	184	232	106	106	228	230	169	169	94	94	233	249	98	102	129	187
846	AF126.1	Madagascar	-	MDG81	-18.55	47.31	1997-07-01	P. Franck	P0Q	A1	A1_MAD3	A	210	212	102	102	181	181	136	149	133	137	128	130	184	184	106	106	230	232	169	169	94	107	233	247	102	102	129	129
847	AF126.2	Madagascar	-	MDG81	-18.55	47.31	1997-07-01	P. Franck	P0Q	A1	A1_MAD3	A	210	212	96	102	181	181	136	149	133	137	128	128	184	234	106	106	220	220	169	169	94	94	233	239	102	102	129	129
848	AF127.1	Madagascar	-	MDG81	-18.55	47.31	1997-07-01	P. Franck	P0Q	A1	x	A	210	210	102	102	181	181	149	149	133	133	128	128	184	234	106	106	220	230	169	169	94	94	233	247	102	102	129	183
849	AF127.2	Madagascar	-	MDG81	-18.55	47.31	1997-07-01	P. Franck	P0Q	A1	x	A	210	210	102	102	181	181	136	136	133	133	128	128	184	238	106	106	220	230	169	169	94	107	233	233	96	102	129	181
850	AF128.1	Madagascar	-	MDG81	-18.55	47.31	1997-07-01	P. Franck	P0Q	A1	x	A	210	214	102	102	175	181	149	149	132	133	128	128	184	230	106	106	228	230	169	169	107	107	235	239	102	102	129	181
851	AF128.2	Madagascar	-	MDG81	-18.55	47.31	1997-07-01	P. Franck	P0Q	A1	A1_MAD3	A	212	212	102	102	181	181	136	149	132	133	128	128	184	184	106	106	230	230	169	169	94	107	233	239	102	102	129	183
852	AF129.1	Madagascar	-	MDG81	-18.55	47.31	1997-07-01	P. Franck	P0Q	A1	x	A	210	214	102	102	175	181	136	147	137	137	128	202	184	230	106	110	220	234	169	169	94	94	233	235	98	102	129	181
853	AF129.2	Madagascar	-	MDG81	-18.55	47.31	1997-07-01	P. Franck	P0Q	A1	x	A	212	214	96	102	175	181	147	149	133	137	128	128	184	226	106	106	220	230	169	169	94	94	233	233	96	102	177	189
854	AF130.1	Madagascar	-	MDG81	-18.55	47.31	1997-07-01	P. Franck	P0Q	A1	x	A	210	214	96	102	181	181	136	147	137	137	128	128	184	184	106	106	230	232	169	169	94	94	239	247	102	102	129	183
855	AF130.2	Madagascar	-	MDG81	-18.55	47.31	1997-07-01	P. Franck	P0Q	A1	A1_MAD3	A	210	214	102	102	181	181	136	147	133	137	128	128	184	184	106	106	230	232	169	169	94	94	233	239	102	102	129	179
856	RUN2063	La Réunion	Mascarenes	REU001	-20.920023	55.395901	2012-10-16	O. Esnault	P0Q	A1	x	A	210	218	100	102	181	181	136	149	133	134	142	162	184	232	106	106	216	230	177	179	92	107	237	239	94	102	141	179
857	RUN2064	La Réunion	Mascarenes	REU001	-20.920023	55.395901	2012-10-16	O. Esnault	P0Q	A1	x	A	210	212	96	100	175	181	147	149	132	133	128	128	184	184	106	106	216	232	169	169	92	107	235	237	94	102	181	181
858	RUN2065	La Réunion	Mascarenes	REU001	-20.920023	55.395901	2012-10-16	O. Esnault	P0Q	A1	A1_MAD3	A	212	212	102	102	181	181	147	149	133	133	128	162	184	184	106	110	218	218	179	181	107	111	237	239	94	102	175	179
859	RUN1703	La Réunion	Mascarenes	REU002	-20.904141	55.392374	2012-04-25	Beekeeper	P0Q	A1	x	A	NA	NA	NA	NA	NA	NA	149	149	133	134	128	162	184	184	110	110	218	222	NA	NA	94	110	237	239	94	102	133	141
860	RUN1704	La Réunion	Mascarenes	REU002	-20.904141	55.392374	2012-04-25	Beekeeper	P0Q	A1	x	A	210	214	102	102	177	181	147	149	133	134	146	156	184	184	106	110	218	234	169	179	111	111	NA	NA	NA	NA	NA	NA
861	RUN1705	La Réunion	Mascarenes	REU002	-20.904141	55.392374	2012-04-25	Beekeeper	P0Q	A1	A1_MAD3	A	210	216	102	102	177	181	147	147	134	134	128	154	184	184	106	110	230	230	169	179	111	113	NA	NA	98	98	NA	NA
862	RUN1706	La Réunion	Mascarenes	REU002	-20.904141	55.392374	2012-04-25	Beekeeper	P0Q	A1	x	A	210	222	102	102	177	181	149	149	133	133	128	128	174	184	106	110	216	232	181	181	94	111	NA	NA	94	94	141	141
863	RUN1707	La Réunion	Mascarenes	REU002	-20.904141	55.392374	2012-04-25	Beekeeper	P0Q	A1	x	A	210	218	96	102	181	181	140	149	134	134	128	166	234	234	106	110	218	218	169	177	NA	NA	NA	NA	NA	NA	NA	NA
864	RUN1708	La Réunion	Mascarenes	REU002	-20.904141	55.392374	2012-04-25	Beekeeper	P0Q	A1	x	A	212	226	96	100	179	181	136	149	133	134	128	156	184	184	106	106	216	230	165	177	94	94	NA	NA	94	102	141	175
865	RUN1709	La Réunion	Mascarenes	REU002	-20.904141	55.392374	2012-04-25	Beekeeper	P0Q	A1	x	A	214	218	96	100	177	181	147	149	132	133	128	146	184	184	110	110	216	218	169	179	NA	NA	NA	NA	NA	NA	NA	NA
866	RUN1710	La Réunion	Mascarenes	REU002	-20.904141	55.392374	2012-04-25	Beekeeper	P0Q	A1	x	A	210	214	100	102	177	181	147	149	133	133	128	142	184	184	106	106	232	236	169	169	92	94	235	239	94	94	141	177
867	RUN1711	La Réunion	Mascarenes	REU002	-20.904141	55.392374	2012-04-25	Beekeeper	P0Q	A1	x	A	212	228	102	102	181	181	136	137	128	134	128	144	184	184	106	110	216	234	169	169	94	111	237	239	94	94	139	175
868	RUN1712	La Réunion	Mascarenes	REU002	-20.904141	55.392374	2012-04-25	Beekeeper	P0Q	A1	x	A	210	218	100	102	175	181	136	149	133	134	156	164	184	184	106	106	218	232	165	169	94	111	237	243	94	102	139	179
869	RUN1713	La Réunion	Mascarenes	REU002	-20.904141	55.392374	2012-04-25	Beekeeper	P0Q	A1	x	A	212	218	100	102	179	181	136	149	132	134	128	128	184	234	110	110	230	232	169	169	107	107	237	239	94	102	139	147
870	RUN1714	La Réunion	Mascarenes	REU002	-20.904141	55.392374	2012-04-25	Beekeeper	P0Q	A1	x	A	210	214	100	102	177	181	136	140	132	134	128	156	184	184	106	110	232	234	169	169	111	111	235	235	102	102	175	177
871	RUN1715	La Réunion	Mascarenes	REU002	-20.904141	55.392374	2012-04-25	Beekeeper	P0Q	A1	x	A	210	226	92	102	181	181	147	147	133	133	128	148	234	234	106	106	230	232	NA	NA	NA	NA	NA	NA	NA	NA	NA	NA
872	RUN1716	La Réunion	Mascarenes	REU002	-20.904141	55.392374	2012-04-25	Beekeeper	P0Q	A1	x	A	210	212	100	102	181	185	136	136	133	134	128	128	174	184	106	106	218	222	169	179	94	111	233	235	94	98	129	141
873	RUN0375	La Réunion	Mascarenes	REU003	-20.909829	55.421652	2011-12-13	Beekeeper	P0Q	A1	x	A	210	218	92	102	177	181	136	149	133	134	128	146	184	184	106	110	214	230	169	177	92	111	233	239	94	102	133	139
874	RUN0376	La Réunion	Mascarenes	REU003	-20.909829	55.421652	2011-12-13	Beekeeper	P0Q	A1	x	A	210	214	100	100	177	181	136	149	134	134	128	142	184	232	106	106	216	232	169	169	92	94	233	233	94	94	129	141
875	RUN1739	La Réunion	Mascarenes	REU003	-20.909829	55.421652	2012-04-25	Beekeeper	P0Q	A1	x	A	210	214	100	102	177	179	136	147	128	134	142	144	184	184	106	110	218	230	169	177	94	111	235	237	102	102	175	177
876	RUN1740	La Réunion	Mascarenes	REU003	-20.909829	55.421652	2012-04-25	Beekeeper	P0Q	A1	x	A	210	214	100	102	181	181	136	149	128	134	128	146	234	234	106	110	216	230	169	179	107	111	225	233	94	102	139	183
877	RUN1741	La Réunion	Mascarenes	REU003	-20.909829	55.421652	2012-04-25	Beekeeper	P0Q	A1	x	A	210	212	96	100	181	181	147	151	132	133	136	142	184	232	106	106	216	232	169	181	107	107	239	249	94	94	139	179
878	RUN1742	La Réunion	Mascarenes	REU003	-20.909829	55.421652	2012-04-25	Beekeeper	P0Q	A1	x	A	214	214	102	102	177	181	140	149	133	133	128	140	184	184	106	110	216	218	169	177	107	111	237	241	102	104	183	185
879	RUN1743	La Réunion	Mascarenes	REU003	-20.909829	55.421652	2012-04-25	Beekeeper	P0Q	A1	x	A	218	218	100	102	181	181	136	140	132	134	126	128	184	184	106	110	216	220	169	169	94	107	233	239	94	100	139	177
880	RUN1750	La Réunion	Mascarenes	REU003	-20.909829	55.421652	2012-04-25	Beekeeper	P0Q	A1	x	A	210	214	96	102	177	181	147	149	128	134	128	128	184	220	106	110	230	230	169	169	99	111	235	239	102	102	139	139
881	RUN0367	La Réunion	Mascarenes	REU003	-20.909829	55.421652	2011-12-13	Beekeeper	Not succesful	Not succesful	x	NA	214	214	102	102	179	181	136	149	133	134	128	148	184	232	106	110	232	236	165	169	107	111	NA	NA	94	102	129	131
882	RUN0368	La Réunion	Mascarenes	REU003	-20.909829	55.421652	2011-12-13	Beekeeper	Not succesful	Not succesful	x	NA	212	218	102	102	181	181	136	147	134	134	128	162	184	184	106	110	222	230	169	169	107	111	241	243	94	94	129	185
883	RUN1911	La Réunion	Mascarenes	REU004	-20.89599	55.45556	2012-07-05	O. Esnault	P0Q	A1	A1_MAD3	A	212	218	96	102	179	181	147	149	132	134	128	128	184	184	110	110	230	232	169	169	107	107	233	243	102	102	181	181
884	RUN1123	La Réunion	Mascarenes	REU005	-20.92265	55.463433	2012-01-27	T. François	P0Q	A1	x	A	214	226	100	102	181	181	136	140	133	134	128	146	184	184	106	110	230	230	169	169	92	111	233	239	82	94	131	139
885	RUN1124	La Réunion	Mascarenes	REU005	-20.92265	55.463433	2012-01-27	T. François	P0Q	A1	x	A	210	214	96	102	181	181	136	149	132	133	128	140	184	184	110	110	218	220	169	179	111	111	233	239	94	94	133	185
886	RUN1125	La Réunion	Mascarenes	REU005	-20.92265	55.463433	2012-01-27	T. François	P0Q	A1	x	A	210	214	96	102	181	181	147	147	132	134	132	140	184	184	110	110	NA	NA	169	169	94	94	233	233	94	94	181	185
887	RUN1126	La Réunion	Mascarenes	REU005	-20.92265	55.463433	2012-01-27	T. François	P0Q	A1	x	A	210	218	100	102	175	181	136	149	128	134	128	140	184	184	106	110	230	236	169	177	94	107	235	239	94	94	141	181
888	RUN1127	La Réunion	Mascarenes	REU005	-20.92265	55.463433	2012-01-27	T. François	P0Q	A1	x	A	210	218	100	100	177	181	136	147	132	134	128	140	184	184	106	106	230	232	NA	NA	107	111	239	239	94	94	177	179
889	RUN1128	La Réunion	Mascarenes	REU005	-20.92265	55.463433	2012-01-27	T. François	P0Q	A1	x	A	210	216	102	102	181	181	136	149	133	134	145	152	184	184	106	110	216	230	165	169	92	112	237	239	94	94	129	181
890	RUN1129	La Réunion	Mascarenes	REU005	-20.92265	55.463433	2012-01-27	T. François	P0Q	A1	x	A	210	216	100	102	181	181	136	149	133	134	152	156	184	184	106	106	218	222	165	169	107	112	233	233	94	102	129	133
891	RUN1130	La Réunion	Mascarenes	REU005	-20.92265	55.463433	2012-01-27	T. François	P0Q	A1	x	A	210	214	96	100	181	181	136	152	133	134	128	156	184	234	106	110	218	232	169	179	94	111	239	243	94	102	141	143
892	RUN1131	La Réunion	Mascarenes	REU005	-20.92265	55.463433	2012-01-27	T. François	P0Q	A1	x	A	210	214	96	102	181	181	136	136	132	132	128	164	184	184	106	110	230	232	165	179	94	111	237	243	94	94	139	143
893	RUN1132	La Réunion	Mascarenes	REU005	-20.92265	55.463433	2012-01-27	T. François	P0Q	A1	A1_REU1	A	216	218	102	102	181	181	147	149	134	134	128	128	184	184	106	110	216	230	169	169	94	111	233	241	94	94	141	179
894	RUN1133	La Réunion	Mascarenes	REU005	-20.92265	55.463433	2012-01-27	T. François	P0Q	A1	x	A	210	210	96	102	181	181	140	147	133	133	128	128	184	184	110	110	230	230	181	185	111	113	233	241	94	102	139	185
895	RUN1134	La Réunion	Mascarenes	REU005	-20.92265	55.463433	2012-01-27	T. François	P0Q	A1	x	A	210	210	102	102	175	181	149	149	133	134	128	148	174	220	106	110	218	230	169	169	111	111	239	243	94	102	139	177
896	RUN1135	La Réunion	Mascarenes	REU005	-20.92265	55.463433	2012-01-27	T. François	P0Q	A1	x	A	210	212	96	100	177	181	147	149	133	134	128	140	184	238	110	110	220	230	165	169	111	116	233	237	94	94	129	185
897	RUN1136	La Réunion	Mascarenes	REU005	-20.92265	55.463433	2012-01-27	T. François	P0Q	A1	x	A	214	218	96	102	181	181	149	149	134	134	128	160	184	184	106	110	216	230	169	181	107	111	239	239	102	102	141	179
898	RUN1137	La Réunion	Mascarenes	REU005	-20.92265	55.463433	2012-01-27	T. François	P0Q	A1	x	A	210	214	96	102	181	181	149	149	134	134	156	160	184	232	110	110	230	232	169	169	94	107	235	239	102	102	141	177
899	RUN1138	La Réunion	Mascarenes	REU005	-20.92265	55.463433	2012-01-27	T. François	P0Q	A1	x	A	214	214	102	102	181	183	147	149	133	134	156	158	184	184	110	110	230	230	175	177	94	117	235	239	94	102	141	143
900	RUN1139	La Réunion	Mascarenes	REU005	-20.92265	55.463433	2012-01-27	T. François	P0Q	A1	x	A	218	218	96	100	179	181	136	149	133	133	128	164	184	184	106	106	222	234	175	179	111	111	233	239	102	102	147	179
901	RUN1140	La Réunion	Mascarenes	REU005	-20.92265	55.463433	2012-01-27	T. François	P0Q	A1	A1_MAD3	A	210	210	96	100	181	181	147	149	132	133	132	146	184	184	110	110	220	236	169	179	107	111	239	239	94	102	139	179
902	RUN1141	La Réunion	Mascarenes	REU005	-20.92265	55.463433	2012-01-27	T. François	P0Q	A1	x	A	214	220	102	102	181	181	136	147	133	133	131	154	184	184	106	110	218	232	169	177	94	111	235	241	94	104	141	179
903	RUN1142	La Réunion	Mascarenes	REU005	-20.92265	55.463433	2012-01-27	T. François	P0Q	A1	x	A	214	214	96	102	177	181	136	149	133	134	128	128	NA	NA	106	110	NA	NA	169	179	94	111	239	249	94	94	129	141
904	RUN1143	La Réunion	Mascarenes	REU005	-20.92265	55.463433	2012-01-27	T. François	P0Q	A1	x	A	210	210	102	102	175	181	149	149	132	134	128	128	184	232	106	110	230	230	169	177	94	107	235	239	94	102	179	181
905	RUN1144	La Réunion	Mascarenes	REU005	-20.92265	55.463433	2012-01-27	T. François	P0Q	A1	x	A	214	218	96	102	177	181	136	136	133	134	126	146	184	184	106	110	230	232	165	169	92	107	239	241	94	104	131	181
906	RUN1145	La Réunion	Mascarenes	REU005	-20.92265	55.463433	2012-01-27	T. François	P0Q	A1	x	A	210	218	100	102	177	181	136	149	134	134	128	156	184	184	110	110	230	230	169	169	94	111	237	237	94	102	129	177
907	RUN1146	La Réunion	Mascarenes	REU005	-20.92265	55.463433	2012-01-27	T. François	P0Q	A1	x	A	210	214	96	102	179	181	147	147	133	134	128	128	184	184	106	106	220	230	169	177	94	111	235	237	102	102	139	181
908	RUN1147	La Réunion	Mascarenes	REU005	-20.92265	55.463433	2012-01-27	T. François	P0Q	A1	x	A	210	220	96	102	175	187	147	149	133	133	128	128	184	206	106	110	216	216	169	179	107	111	233	237	94	102	129	177
909	RUN1148	La Réunion	Mascarenes	REU005	-20.92265	55.463433	2012-01-27	T. François	P0Q	A1	x	A	210	214	102	102	177	181	149	149	134	134	NA	NA	NA	NA	NA	NA	220	222	169	177	111	111	231	243	94	102	177	177
910	RUN1149	La Réunion	Mascarenes	REU005	-20.92265	55.463433	2012-01-27	T. François	P0Q	A1	x	A	210	218	96	100	175	183	140	147	133	133	128	128	184	184	106	106	216	232	169	169	94	110	225	233	94	102	139	179
911	RUN1150	La Réunion	Mascarenes	REU005	-20.92265	55.463433	2012-01-27	T. François	P0Q	A1	x	A	210	210	102	102	177	181	147	149	134	134	128	128	174	184	110	110	226	230	169	179	111	111	233	239	94	102	129	183
912	RUN1151	La Réunion	Mascarenes	REU005	-20.92265	55.463433	2012-01-27	T. François	P0Q	A1	x	A	214	218	102	102	175	181	147	149	134	134	128	128	174	184	110	110	226	230	169	177	94	94	231	243	94	102	131	175
913	RUN1152	La Réunion	Mascarenes	REU005	-20.92265	55.463433	2012-01-27	T. François	P0Q	A1	x	A	210	218	102	102	181	181	136	136	132	133	128	128	184	234	110	110	230	230	169	177	94	111	243	243	94	102	129	177
914	RUN1153	La Réunion	Mascarenes	REU005	-20.92265	55.463433	2012-01-27	T. François	P0Q	A1	x	A	210	214	100	102	181	181	136	136	133	134	128	162	184	234	106	106	230	230	169	177	94	111	237	243	94	102	131	139
915	RUN1154	La Réunion	Mascarenes	REU005	-20.92265	55.463433	2012-01-27	T. François	P0Q	A1	A1_MAD3	A	210	214	102	102	181	181	136	149	134	134	128	154	184	184	106	106	230	232	NA	NA	111	111	243	243	102	104	177	181
916	RUN1912	La Réunion	Mascarenes	REU006	-20.921879	55.473009	2012-07-05	O. Esnault	P0Q	A1	x	A	210	218	96	102	181	181	147	149	132	134	128	128	184	220	106	110	216	232	169	181	94	113	237	243	102	102	181	181
917	RUN0002	La Réunion	Mascarenes	REU007	-20.9094	55.480067	2011-12-10	M. Techer	P0Q	A1	A1_MAD3	A	210	214	102	102	NA	NA	136	147	132	134	140	140	184	222	110	110	222	222	NA	NA	94	94	NA	NA	102	102	NA	NA
918	RUN1605	La Réunion	Mascarenes	REU008	-20.895403	55.539908	2012-04-01	M. Techer	P0Q	A1	x	A	210	214	96	102	177	181	147	149	133	134	NA	NA	184	184	106	110	NA	NA	NA	NA	92	107	233	237	94	102	133	133
919	RUN1910	La Réunion	Mascarenes	REU009	-20.926914	55.544788	2012-07-05	O. Esnault	P0Q	A1	A1_MAD3	A	214	214	100	102	175	181	140	147	133	134	146	162	184	202	106	106	218	220	169	177	94	111	235	235	94	100	141	177
920	RUN0970	La Réunion	Mascarenes	REU010	-20.925402	55.548766	2012-01-21	C. Ajaguin	P0Q	A1	A1_MAD3	A	210	214	100	102	181	181	147	147	133	134	128	154	184	184	106	110	230	234	165	169	111	111	233	233	94	102	133	139
921	RUN0066	La Réunion	Mascarenes	REU011	-20.915467	55.610533	2011-12-13	M. Techer, J. Clemencet	P0Q	A1	x	A	210	214	100	102	177	179	149	149	133	134	128	128	184	184	106	110	228	228	165	179	107	111	237	239	94	102	141	141
922	RUN0067	La Réunion	Mascarenes	REU011	-20.915467	55.610533	2011-12-13	M. Techer, J. Clemencet	P0Q	A1	A1_MAD3	A	210	222	96	102	181	181	149	149	134	134	NA	NA	184	184	106	106	230	230	169	181	94	111	235	239	102	102	133	139
923	RUN0068	La Réunion	Mascarenes	REU011	-20.915467	55.610533	2011-12-13	M. Techer, J. Clemencet	P0Q	A1	x	A	210	220	92	96	181	181	149	149	132	134	128	128	184	184	106	106	NA	NA	177	179	111	111	233	243	94	94	133	179
924	RUN0069	La Réunion	Mascarenes	REU011	-20.915467	55.610533	2011-12-13	M. Techer, J. Clemencet	P0Q	A1	x	A	214	214	96	100	181	181	136	149	133	134	128	128	184	184	106	106	216	232	169	169	111	111	233	239	94	102	129	141
925	RUN0070	La Réunion	Mascarenes	REU011	-20.915467	55.610533	2011-12-13	M. Techer, J. Clemencet	P0Q	A1	x	A	210	218	100	102	179	181	147	149	133	134	128	156	184	184	110	112	230	230	169	169	94	107	239	241	94	102	139	181
926	RUN0072	La Réunion	Mascarenes	REU011	-20.915467	55.610533	2011-12-13	M. Techer, J. Clemencet	P0Q	A1	x	A	214	218	96	100	177	179	149	149	132	134	128	128	184	184	106	110	230	232	169	177	107	110	233	243	102	104	139	179
927	RUN0073	La Réunion	Mascarenes	REU011	-20.915467	55.610533	2011-12-13	M. Techer, J. Clemencet	P0Q	A1	x	A	210	214	96	102	175	181	136	149	132	134	128	146	184	184	106	106	216	230	NA	NA	111	111	235	239	94	102	177	177
928	RUN0074	La Réunion	Mascarenes	REU011	-20.915467	55.610533	2011-12-13	M. Techer, J. Clemencet	P0Q	A1	x	A	212	218	100	102	175	179	NA	NA	134	134	NA	NA	NA	NA	NA	NA	216	216	177	179	94	111	239	239	94	102	139	177
929	RUN0076	La Réunion	Mascarenes	REU011	-20.915467	55.610533	2011-12-13	M. Techer, J. Clemencet	P0Q	A1	x	A	214	218	100	102	177	181	149	149	134	134	NA	NA	184	184	NA	NA	220	230	169	181	107	111	233	235	94	94	139	177
930	RUN0078	La Réunion	Mascarenes	REU011	-20.915467	55.610533	2011-12-13	M. Techer, J. Clemencet	P0Q	A1	x	A	212	212	96	102	179	181	136	149	133	134	128	128	184	184	110	110	216	222	175	181	107	111	231	243	94	102	139	141
931	RUN0079	La Réunion	Mascarenes	REU011	-20.915467	55.610533	2011-12-13	M. Techer, J. Clemencet	P0Q	A1	x	A	210	220	102	102	181	181	140	149	133	134	128	152	184	184	106	110	230	230	165	169	111	117	233	233	102	102	139	177
932	RUN0080	La Réunion	Mascarenes	REU011	-20.915467	55.610533	2011-12-13	M. Techer, J. Clemencet	P0Q	A1	x	A	214	216	96	102	181	187	149	149	128	133	128	128	NA	NA	106	110	222	230	169	181	94	107	233	235	94	102	139	141
933	RUN0081	La Réunion	Mascarenes	REU011	-20.915467	55.610533	2011-12-13	M. Techer, J. Clemencet	P0Q	A1	x	A	212	214	100	102	181	187	136	149	133	134	128	133	184	234	106	110	216	216	169	177	92	107	235	241	102	102	141	181
934	RUN0082	La Réunion	Mascarenes	REU011	-20.915467	55.610533	2011-12-13	M. Techer, J. Clemencet	P0Q	A1	x	A	210	212	96	100	179	181	147	149	134	134	128	128	184	184	106	110	220	230	169	181	94	94	233	237	94	102	139	139
935	RUN0084	La Réunion	Mascarenes	REU011	-20.915467	55.610533	2011-12-13	M. Techer, J. Clemencet	P0Q	A1	x	A	210	214	100	102	175	177	136	136	133	134	128	128	184	184	106	110	220	230	165	169	111	111	233	233	94	94	139	181
936	RUN0085	La Réunion	Mascarenes	REU011	-20.915467	55.610533	2011-12-13	M. Techer, J. Clemencet	P0Q	A1	x	A	212	218	96	100	177	179	149	149	132	134	128	128	174	234	106	110	230	230	165	179	92	94	233	239	94	102	139	141
937	RUN0086	La Réunion	Mascarenes	REU011	-20.915467	55.610533	2011-12-13	M. Techer, J. Clemencet	P0Q	A1	x	A	210	218	96	102	177	181	136	149	132	134	128	128	184	184	110	110	230	232	169	177	107	111	239	243	94	102	129	163
938	RUN0087	La Réunion	Mascarenes	REU011	-20.915467	55.610533	2011-12-13	M. Techer, J. Clemencet	P0Q	A1	x	A	210	210	96	102	177	181	147	149	133	134	NA	NA	184	184	106	106	216	216	179	179	94	111	225	225	94	94	133	141
939	RUN0088	La Réunion	Mascarenes	REU011	-20.915467	55.610533	2011-12-13	M. Techer, J. Clemencet	P0Q	A1	x	A	210	210	92	102	175	181	147	149	132	133	128	128	184	184	106	106	220	230	169	177	107	111	239	243	94	94	141	147
940	RUN0090	La Réunion	Mascarenes	REU011	-20.915467	55.610533	2011-12-13	M. Techer, J. Clemencet	P0Q	A1	x	A	210	210	96	102	175	181	136	136	133	134	NA	NA	NA	NA	106	106	NA	NA	169	177	107	111	239	239	94	94	141	181
941	RUN0091	La Réunion	Mascarenes	REU011	-20.915467	55.610533	2011-12-13	M. Techer, J. Clemencet	P0Q	A1	x	A	214	214	100	100	177	177	147	149	128	133	128	128	184	184	110	110	216	218	169	169	107	111	235	237	94	102	167	181
942	RUN0093	La Réunion	Mascarenes	REU011	-20.915467	55.610533	2011-12-13	M. Techer, J. Clemencet	P0Q	A1	x	A	210	210	102	102	181	181	136	149	133	134	128	142	184	184	106	110	216	216	169	181	107	111	233	239	94	102	139	181
943	RUN0094	La Réunion	Mascarenes	REU011	-20.915467	55.610533	2011-12-13	M. Techer, J. Clemencet	P0Q	A1	x	A	210	210	102	102	177	181	136	149	133	134	128	162	184	184	106	106	216	216	177	179	94	111	239	239	94	102	149	181
944	RUN0095	La Réunion	Mascarenes	REU011	-20.915467	55.610533	2011-12-13	M. Techer, J. Clemencet	P0Q	A1	x	A	212	218	102	102	181	183	136	149	133	134	NA	NA	NA	NA	106	110	NA	NA	169	181	92	111	243	253	94	102	135	179
945	RUN0096	La Réunion	Mascarenes	REU011	-20.915467	55.610533	2011-12-13	M. Techer, J. Clemencet	P0Q	A1	x	A	210	210	92	102	181	181	137	149	132	134	128	128	184	234	106	110	218	230	169	169	94	107	235	235	102	102	133	139
946	RUN0097	La Réunion	Mascarenes	REU011	-20.915467	55.610533	2011-12-13	M. Techer, J. Clemencet	P0Q	A1	x	A	214	218	NA	NA	175	181	149	149	133	133	128	158	184	184	106	110	220	230	169	169	107	111	233	237	94	102	133	141
947	RUN0099	La Réunion	Mascarenes	REU011	-20.915467	55.610533	2011-12-13	M. Techer, J. Clemencet	P0Q	A1	x	A	210	214	92	102	177	181	147	149	132	133	154	156	184	184	106	106	230	230	169	175	107	111	225	233	94	94	139	141
948	RUN0100	La Réunion	Mascarenes	REU011	-20.915467	55.610533	2011-12-13	M. Techer, J. Clemencet	P0Q	A1	x	A	210	210	102	102	181	181	136	149	132	134	132	162	174	184	106	110	228	230	169	177	107	111	235	247	94	94	177	177
949	RUN0101	La Réunion	Mascarenes	REU011	-20.915467	55.610533	2011-12-13	M. Techer, J. Clemencet	P0Q	A1	A1_MAD3	A	210	218	92	102	177	181	136	149	133	134	128	162	184	184	110	110	212	232	177	179	107	107	237	243	94	102	181	185
950	RUN0102	La Réunion	Mascarenes	REU011	-20.915467	55.610533	2011-12-13	M. Techer, J. Clemencet	P0Q	A1	x	A	214	214	96	102	181	181	136	149	133	134	128	154	184	184	106	110	216	222	169	181	94	94	235	243	94	102	139	149
951	RUN0103	La Réunion	Mascarenes	REU011	-20.915467	55.610533	2011-12-13	M. Techer, J. Clemencet	P0Q	A1	x	A	210	210	96	102	175	177	149	149	133	133	128	154	184	234	106	110	230	232	169	169	107	107	237	239	94	102	179	181
952	RUN0105	La Réunion	Mascarenes	REU011	-20.915467	55.610533	2011-12-13	M. Techer, J. Clemencet	P0Q	A1	x	A	210	216	100	102	181	187	149	149	132	133	152	154	184	184	106	110	230	232	169	169	111	113	235	241	102	102	179	183
953	RUN0106	La Réunion	Mascarenes	REU011	-20.915467	55.610533	2011-12-13	M. Techer, J. Clemencet	P0Q	A1	x	A	210	228	100	102	175	181	149	149	134	134	128	146	174	184	110	110	230	230	169	175	111	111	233	239	94	104	133	143
954	RUN0065	La Réunion	Mascarenes	REU011	-20.915467	55.610533	2011-12-13	M. Techer, J. Clemencet	Q	C1-C2	C2_a	C	NA	NA	96	102	181	181	136	136	132	133	NA	NA	184	200	NA	NA	NA	NA	169	169	92	94	233	235	102	102	139	139
955	RUN0071	La Réunion	Mascarenes	REU011	-20.915467	55.610533	2011-12-13	M. Techer, J. Clemencet	Q	C1-C2	C2_a	C	210	212	96	102	175	177	136	149	132	133	128	128	184	234	106	110	222	230	169	177	94	111	233	239	NA	NA	139	181
956	RUN0075	La Réunion	Mascarenes	REU011	-20.915467	55.610533	2011-12-13	M. Techer, J. Clemencet	Q	C1-C2	C2_a	C	214	218	100	102	181	181	136	147	132	134	128	156	184	184	106	110	216	230	169	169	94	107	239	239	94	102	177	181
957	RUN0077	La Réunion	Mascarenes	REU011	-20.915467	55.610533	2011-12-13	M. Techer, J. Clemencet	Q	C1-C2	C2_a	C	214	214	100	100	175	181	136	136	133	133	128	128	184	184	106	110	230	234	169	177	94	94	233	243	94	102	141	177
958	RUN0083	La Réunion	Mascarenes	REU011	-20.915467	55.610533	2011-12-13	M. Techer, J. Clemencet	Q	C1-C2	C2_a	C	218	218	102	102	179	179	147	149	134	134	142	156	184	184	106	110	218	230	169	169	111	119	237	239	94	104	181	181
959	RUN0089	La Réunion	Mascarenes	REU011	-20.915467	55.610533	2011-12-13	M. Techer, J. Clemencet	Q	C1-C2	C2_a	C	210	212	100	102	177	181	147	149	133	133	128	128	184	184	106	106	216	216	177	177	107	113	233	241	94	94	129	177
960	RUN0092	La Réunion	Mascarenes	REU011	-20.915467	55.610533	2011-12-13	M. Techer, J. Clemencet	Q	C1-C2	C2_a	C	210	210	96	102	175	181	136	136	132	134	128	158	184	184	106	110	216	218	169	181	94	111	225	239	94	102	139	177
961	RUN0098	La Réunion	Mascarenes	REU011	-20.915467	55.610533	2011-12-13	M. Techer, J. Clemencet	Q	C1-C2	C2_a	C	210	214	100	102	177	179	136	149	134	134	150	158	184	232	106	110	230	232	169	169	107	113	233	233	94	102	129	139
962	RUN0104	La Réunion	Mascarenes	REU011	-20.915467	55.610533	2011-12-13	M. Techer, J. Clemencet	Q	C1-C2	x	C	212	212	100	100	175	181	149	149	132	133	140	142	184	184	106	106	228	230	169	177	92	111	225	233	94	104	133	141
963	RUN0369	La Réunion	Mascarenes	REU012	-20.97518	55.57577	2011-12-13	Beekeeper	P0Q	A1	A1_MAD3	A	210	218	92	96	181	183	147	149	132	134	156	162	184	184	106	110	216	222	177	177	94	111	237	239	94	102	179	181
964	RUN0370	La Réunion	Mascarenes	REU012	-20.97518	55.57577	2011-12-13	Beekeeper	P0Q	A1	x	A	210	218	100	100	181	181	149	149	133	134	128	135	184	184	110	110	212	218	169	179	111	111	237	237	94	102	179	181
965	RUN0036	La Réunion	Mascarenes	REU013	-20.946767	55.668267	2011-12-13	M. Techer, J. Clemencet	P0Q	A1	x	A	218	218	92	102	181	181	136	149	133	134	128	128	184	184	106	110	216	216	169	177	94	107	231	233	94	94	141	177
966	RUN0037	La Réunion	Mascarenes	REU013	-20.946767	55.668267	2011-12-13	M. Techer, J. Clemencet	P0Q	A1	x	A	210	214	96	102	177	181	147	149	134	134	128	128	184	184	106	110	216	230	169	169	94	111	233	233	94	102	139	139
967	RUN0038	La Réunion	Mascarenes	REU013	-20.946767	55.668267	2011-12-13	M. Techer, J. Clemencet	P0Q	A1	A1_MAD3	A	210	210	92	96	175	181	149	149	132	134	128	156	184	184	110	110	220	232	169	177	107	107	233	239	94	102	181	183
968	RUN0039	La Réunion	Mascarenes	REU013	-20.946767	55.668267	2011-12-13	M. Techer, J. Clemencet	P0Q	A1	x	A	210	212	102	102	179	181	136	149	132	134	152	154	184	202	106	106	220	228	169	169	94	107	235	239	102	102	139	177
969	RUN0040	La Réunion	Mascarenes	REU013	-20.946767	55.668267	2011-12-13	M. Techer, J. Clemencet	P0Q	A1	x	A	212	214	100	102	179	181	136	149	133	134	128	128	184	184	110	110	216	228	169	179	94	111	233	243	94	102	129	147
970	RUN0041	La Réunion	Mascarenes	REU013	-20.946767	55.668267	2011-12-13	M. Techer, J. Clemencet	P0Q	A1	x	A	214	220	96	102	175	177	136	149	133	134	NA	NA	NA	NA	106	106	NA	NA	169	169	111	111	233	235	94	94	129	141
971	RUN0042	La Réunion	Mascarenes	REU013	-20.946767	55.668267	2011-12-13	M. Techer, J. Clemencet	P0Q	A1	x	A	210	210	96	102	175	181	136	136	133	133	128	128	184	184	106	110	218	230	169	177	94	111	233	237	102	102	133	181
972	RUN0043	La Réunion	Mascarenes	REU013	-20.946767	55.668267	2011-12-13	M. Techer, J. Clemencet	P0Q	A1	x	A	210	218	100	102	181	181	136	149	134	134	NA	NA	NA	NA	106	106	NA	NA	169	169	111	111	231	239	94	102	141	179
973	RUN0044	La Réunion	Mascarenes	REU013	-20.946767	55.668267	2011-12-13	M. Techer, J. Clemencet	P0Q	A1	x	A	214	216	96	100	181	181	136	147	133	134	128	164	184	184	106	106	220	230	169	169	94	107	237	239	102	102	129	133
974	RUN0045	La Réunion	Mascarenes	REU013	-20.946767	55.668267	2011-12-13	M. Techer, J. Clemencet	P0Q	A1	x	A	210	218	100	102	179	181	136	140	133	134	128	128	184	184	106	106	222	230	169	181	107	111	231	239	94	102	139	181
975	RUN0046	La Réunion	Mascarenes	REU013	-20.946767	55.668267	2011-12-13	M. Techer, J. Clemencet	P0Q	A1	x	A	212	218	100	102	181	187	149	149	133	134	128	146	184	184	110	110	218	232	169	179	111	111	237	237	94	100	129	129
976	RUN0047	La Réunion	Mascarenes	REU013	-20.946767	55.668267	2011-12-13	M. Techer, J. Clemencet	P0Q	A1	x	A	210	210	96	102	177	181	136	149	133	134	128	128	174	184	106	106	230	230	169	175	111	116	233	239	94	102	129	133
977	RUN0048	La Réunion	Mascarenes	REU013	-20.946767	55.668267	2011-12-13	M. Techer, J. Clemencet	P0Q	A1	x	A	210	218	102	102	181	181	136	149	133	133	128	128	184	184	106	106	222	230	169	169	111	111	231	243	94	102	181	181
978	RUN0049	La Réunion	Mascarenes	REU013	-20.946767	55.668267	2011-12-13	M. Techer, J. Clemencet	P0Q	A1	x	A	214	226	96	102	177	181	136	147	134	134	NA	NA	184	184	110	110	NA	NA	169	169	111	111	233	239	94	102	139	139
979	RUN0050	La Réunion	Mascarenes	REU013	-20.946767	55.668267	2011-12-13	M. Techer, J. Clemencet	P0Q	A1	x	A	214	218	100	102	177	179	149	149	133	134	128	128	184	184	106	106	222	230	169	169	94	94	233	239	94	102	129	141
980	RUN0051	La Réunion	Mascarenes	REU013	-20.946767	55.668267	2011-12-13	M. Techer, J. Clemencet	P0Q	A1	x	A	210	222	96	102	181	181	140	149	134	134	128	141	184	184	106	110	230	232	169	179	111	111	233	233	102	102	131	179
981	RUN0052	La Réunion	Mascarenes	REU013	-20.946767	55.668267	2011-12-13	M. Techer, J. Clemencet	P0Q	A1	x	A	210	220	92	96	181	181	136	136	132	133	128	154	232	232	106	106	220	230	169	177	92	111	229	235	102	104	183	185
982	RUN0053	La Réunion	Mascarenes	REU013	-20.946767	55.668267	2011-12-13	M. Techer, J. Clemencet	P0Q	A1	x	A	214	214	96	100	181	181	149	149	132	132	156	156	184	228	106	110	220	224	169	169	107	111	233	239	94	102	143	181
983	RUN0054	La Réunion	Mascarenes	REU013	-20.946767	55.668267	2011-12-13	M. Techer, J. Clemencet	P0Q	A1	x	A	210	218	100	102	179	181	140	149	133	134	128	154	184	184	106	106	224	230	169	169	94	111	231	233	102	102	129	139
984	RUN0055	La Réunion	Mascarenes	REU013	-20.946767	55.668267	2011-12-13	M. Techer, J. Clemencet	P0Q	A1	x	A	210	220	96	102	177	179	147	149	132	133	128	154	184	184	106	110	230	230	169	169	111	111	235	237	94	94	129	183
985	RUN0056	La Réunion	Mascarenes	REU013	-20.946767	55.668267	2011-12-13	M. Techer, J. Clemencet	P0Q	A1	x	A	214	218	96	100	177	179	149	149	128	133	128	128	184	184	106	106	230	230	169	169	111	111	229	237	102	102	129	141
986	RUN0057_2	La Réunion	Mascarenes	REU013	-20.946767	55.668267	2011-12-13	M. Techer, J. Clemencet	P0Q	A1	x	A	210	210	102	102	181	181	147	147	133	134	146	156	184	232	106	106	230	230	177	179	111	119	225	245	102	102	131	131
987	RUN0058	La Réunion	Mascarenes	REU013	-20.946767	55.668267	2011-12-13	M. Techer, J. Clemencet	P0Q	A1	x	A	NA	NA	NA	NA	NA	NA	149	149	133	134	128	128	184	184	106	106	222	230	169	169	94	94	233	239	94	102	129	141
988	RUN0059	La Réunion	Mascarenes	REU013	-20.946767	55.668267	2011-12-13	M. Techer, J. Clemencet	P0Q	A1	x	A	NA	NA	NA	NA	NA	NA	140	149	134	134	128	141	184	184	106	110	230	232	169	179	111	111	233	233	102	102	131	179
989	RUN0060	La Réunion	Mascarenes	REU013	-20.946767	55.668267	2011-12-13	M. Techer, J. Clemencet	P0Q	A1	A1_MAD3	A	210	210	96	102	175	181	136	136	132	133	128	154	232	232	106	106	220	230	169	177	92	111	229	235	102	104	183	185
990	RUN0061	La Réunion	Mascarenes	REU013	-20.946767	55.668267	2011-12-13	M. Techer, J. Clemencet	P0Q	A1	x	A	NA	NA	NA	NA	NA	NA	149	149	132	132	156	156	184	184	106	110	220	224	169	169	107	111	233	239	94	102	143	181
991	RUN0062	La Réunion	Mascarenes	REU013	-20.946767	55.668267	2011-12-13	M. Techer, J. Clemencet	P0Q	A1	x	A	NA	NA	NA	NA	NA	NA	140	149	133	134	154	162	184	232	106	106	224	230	169	169	94	111	231	233	102	102	139	177
992	RUN0063	La Réunion	Mascarenes	REU013	-20.946767	55.668267	2011-12-13	M. Techer, J. Clemencet	P0Q	A1	x	A	NA	NA	NA	NA	NA	NA	147	149	132	133	128	128	184	184	106	110	230	230	169	169	111	111	235	237	94	94	129	183
993	RUN0064	La Réunion	Mascarenes	REU013	-20.946767	55.668267	2011-12-13	M. Techer, J. Clemencet	P0Q	A1	x	A	NA	NA	NA	NA	NA	NA	149	149	128	133	128	128	184	184	106	106	230	230	169	169	111	111	229	237	102	102	129	141
994	RUN1088	La Réunion	Mascarenes	REU014	-20.980092	55.662855	2012-02-21	T. François	P0Q	A1	x	A	210	210	92	96	175	177	136	149	132	132	128	156	184	184	106	110	230	230	179	179	94	111	225	239	94	102	139	141
995	RUN1100	La Réunion	Mascarenes	REU014	-20.980092	55.662855	2012-02-21	T. François	P0Q	A1	A1_MAD3	A	210	210	100	102	177	177	136	136	128	134	128	128	184	184	106	110	218	218	169	175	94	111	233	239	102	102	129	141
996	RUN1467	La Réunion	Mascarenes	REU014	-20.980092	55.662855	2012-02-21	P. Turpin	P0Q	A1	x	A	210	214	102	102	177	181	136	149	133	133	156	156	184	184	106	106	216	220	177	181	111	117	237	239	94	102	175	181
997	RUN1468	La Réunion	Mascarenes	REU014	-20.980092	55.662855	2012-02-21	P. Turpin	P0Q	A1	x	A	210	210	100	102	181	181	136	147	134	134	162	164	184	184	106	110	216	216	165	169	107	110	225	233	94	104	141	181
998	RUN1469	La Réunion	Mascarenes	REU014	-20.980092	55.662855	2012-02-21	P. Turpin	P0Q	A1	x	A	210	218	100	102	181	181	147	149	134	134	128	128	174	184	106	106	220	230	169	177	107	111	235	239	102	102	129	177
999	RUN1470	La Réunion	Mascarenes	REU014	-20.980092	55.662855	2012-02-21	P. Turpin	P0Q	A1	x	A	210	212	102	102	179	181	147	149	134	134	128	156	184	184	106	110	222	230	177	181	111	111	235	239	94	94	139	163
1000	RUN1471	La Réunion	Mascarenes	REU014	-20.980092	55.662855	2012-02-21	P. Turpin	P0Q	A1	x	A	218	226	100	102	175	181	136	149	132	134	128	130	184	232	106	106	218	220	169	179	94	111	233	235	94	102	141	181
1001	RUN1472	La Réunion	Mascarenes	REU014	-20.980092	55.662855	2012-02-21	P. Turpin	P0Q	A1	A1_MAD3	A	214	214	96	102	175	181	149	149	133	133	128	128	184	202	106	106	218	220	179	181	94	111	235	239	102	102	141	183
1002	RUN1473	La Réunion	Mascarenes	REU014	-20.980092	55.662855	2012-02-21	P. Turpin	P0Q	A1	x	A	210	210	102	102	181	181	136	149	134	134	128	140	184	184	106	110	230	230	169	169	94	107	231	231	94	102	NA	NA
1003	RUN1474	La Réunion	Mascarenes	REU014	-20.980092	55.662855	2012-02-21	P. Turpin	P0Q	A1	x	A	214	218	100	102	181	181	136	147	133	134	128	128	184	232	110	110	230	230	169	169	94	111	239	239	94	94	183	185
1004	RUN1475	La Réunion	Mascarenes	REU014	-20.980092	55.662855	2012-02-21	P. Turpin	P0Q	A1	x	A	210	216	96	96	181	181	147	149	133	134	140	162	184	234	106	106	230	230	177	179	94	107	229	239	94	94	139	163
1005	RUN1476	La Réunion	Mascarenes	REU014	-20.980092	55.662855	2012-02-21	P. Turpin	P0Q	A1	x	A	214	214	96	100	177	181	149	149	133	133	128	152	184	238	110	110	220	230	165	169	107	111	233	235	94	96	141	181
1006	RUN1477	La Réunion	Mascarenes	REU014	-20.980092	55.662855	2012-02-21	P. Turpin	P0Q	A1	x	A	210	218	96	102	177	181	149	149	133	134	131	131	174	206	106	106	220	230	169	181	94	111	237	239	94	102	141	181
1007	RUN1478_2	La Réunion	Mascarenes	REU014	-20.980092	55.662855	2012-02-21	P. Turpin	P0Q	A1	x	A	210	218	102	102	177	181	NA	NA	NA	NA	NA	NA	184	184	106	110	NA	NA	169	181	107	111	233	233	94	94	129	129
1008	RUN1479	La Réunion	Mascarenes	REU014	-20.980092	55.662855	2012-02-21	P. Turpin	P0Q	A1	x	A	210	214	102	102	177	177	140	147	133	134	126	128	184	200	106	110	216	230	169	169	109	110	231	233	94	102	181	183
1009	RUN1480	La Réunion	Mascarenes	REU014	-20.980092	55.662855	2012-02-21	P. Turpin	P0Q	A1	x	A	210	214	102	102	175	181	147	149	133	134	128	128	184	184	106	110	222	230	169	169	111	111	237	239	94	94	179	181
1010	RUN1481_2	La Réunion	Mascarenes	REU014	-20.980092	55.662855	2012-02-21	P. Turpin	P0Q	A1	x	A	210	210	102	102	177	181	136	136	134	134	128	156	184	184	106	110	232	232	175	177	111	111	233	233	94	102	175	183
1011	RUN1482	La Réunion	Mascarenes	REU014	-20.980092	55.662855	2012-02-21	P. Turpin	P0Q	A1	x	A	210	218	92	92	181	181	149	149	128	133	131	160	184	184	106	110	216	230	165	165	111	111	233	241	94	94	179	181
1012	RUN1483	La Réunion	Mascarenes	REU014	-20.980092	55.662855	2012-02-21	P. Turpin	P0Q	A1	x	A	214	218	96	102	181	181	136	136	133	133	128	140	184	184	110	110	230	232	169	175	111	111	237	243	94	102	129	163
1013	RUN1484	La Réunion	Mascarenes	REU014	-20.980092	55.662855	2012-02-21	P. Turpin	P0Q	A1	x	A	210	210	96	100	177	181	149	149	133	133	128	128	184	184	106	112	230	230	169	169	107	111	233	249	94	102	133	181
1014	RUN1485	La Réunion	Mascarenes	REU014	-20.980092	55.662855	2012-02-21	P. Turpin	P0Q	A1	x	A	214	218	102	102	175	183	136	149	128	133	128	128	184	184	106	106	230	230	177	179	111	111	233	237	102	104	139	143
1015	RUN1486	La Réunion	Mascarenes	REU014	-20.980092	55.662855	2012-02-21	P. Turpin	P0Q	A1	x	A	210	214	92	96	177	181	147	149	133	134	128	128	184	184	110	110	222	230	165	179	111	111	235	237	102	102	139	177
1016	RUN1487	La Réunion	Mascarenes	REU014	-20.980092	55.662855	2012-02-21	P. Turpin	P0Q	A1	x	A	210	214	92	96	177	177	136	149	132	133	128	152	184	184	106	110	220	220	177	181	94	107	237	243	102	102	141	179
1017	RUN1488	La Réunion	Mascarenes	REU014	-20.980092	55.662855	2012-02-21	P. Turpin	P0Q	A1	x	A	210	214	92	102	177	177	149	149	132	134	128	128	184	202	106	110	216	216	169	179	94	111	233	239	102	102	149	179
1018	RUN1489	La Réunion	Mascarenes	REU014	-20.980092	55.662855	2012-02-21	P. Turpin	P0Q	A1	x	A	210	210	96	102	177	181	149	149	132	132	128	133	184	202	106	110	232	232	165	169	107	107	233	235	102	104	141	177
1019	RUN1490	La Réunion	Mascarenes	REU014	-20.980092	55.662855	2012-02-21	P. Turpin	P0Q	A1	A1_MAD3	A	210	218	96	100	175	181	136	149	128	133	128	128	184	184	106	110	220	222	169	177	111	111	241	243	94	94	141	181
1020	RUN1491	La Réunion	Mascarenes	REU014	-20.980092	55.662855	2012-02-21	P. Turpin	P0Q	A1	x	A	210	212	100	102	181	181	149	149	132	134	128	128	184	184	110	110	216	230	165	169	111	111	237	239	102	102	141	181
1021	RUN1492	La Réunion	Mascarenes	REU014	-20.980092	55.662855	2012-02-21	P. Turpin	P0Q	A1	x	A	210	210	96	100	177	181	136	149	133	133	128	156	212	232	106	110	216	228	169	179	111	111	233	247	94	102	131	177
1022	RUN1493	La Réunion	Mascarenes	REU014	-20.980092	55.662855	2012-02-21	P. Turpin	P0Q	A1	x	A	214	222	96	102	177	177	133	136	132	133	128	128	184	200	110	110	230	230	169	169	99	111	243	247	102	102	181	181
1023	RUN1494	La Réunion	Mascarenes	REU014	-20.980092	55.662855	2012-02-21	P. Turpin	P0Q	A1	x	A	210	218	102	102	175	177	136	149	132	134	128	128	184	184	106	110	230	230	165	177	107	111	235	239	94	94	177	179
1024	RUN1495	La Réunion	Mascarenes	REU014	-20.980092	55.662855	2012-02-21	P. Turpin	P0Q	A1	x	A	210	212	102	102	177	181	149	149	134	134	128	128	202	232	110	110	216	230	169	169	94	111	233	235	102	102	139	177
1025	RUN1496	La Réunion	Mascarenes	REU014	-20.980092	55.662855	2012-02-21	P. Turpin	P0Q	A1	x	A	214	218	100	102	175	181	136	149	134	134	128	128	184	232	106	110	218	222	169	169	111	111	233	239	94	102	177	181
1026	RUN1497	La Réunion	Mascarenes	REU014	-20.980092	55.662855	2012-02-21	P. Turpin	P0Q	A1	x	A	214	218	100	102	181	181	136	136	134	134	128	128	184	184	NA	NA	230	232	169	169	94	107	235	239	94	94	139	141
1027	RUN1498	La Réunion	Mascarenes	REU014	-20.980092	55.662855	2012-02-21	P. Turpin	P0Q	A1	x	A	214	216	102	102	175	181	149	149	133	134	128	140	184	202	106	110	222	230	177	179	94	99	233	235	94	102	147	183
1028	RUN1499	La Réunion	Mascarenes	REU014	-20.980092	55.662855	2012-02-21	P. Turpin	P0Q	A1	x	A	210	226	96	102	177	179	136	149	132	133	140	142	184	184	106	106	222	230	169	181	107	111	237	243	94	94	139	177
1029	RUN1500	La Réunion	Mascarenes	REU014	-20.980092	55.662855	2012-02-21	P. Turpin	P0Q	A1	x	A	210	212	102	102	177	181	136	149	132	134	128	128	184	184	106	110	218	218	175	181	111	111	233	233	102	102	129	139
1030	RUN1501	La Réunion	Mascarenes	REU014	-20.980092	55.662855	2012-02-21	P. Turpin	P0Q	A1	x	A	210	214	102	102	175	181	149	151	133	133	128	140	184	184	106	106	216	226	169	179	94	107	233	233	94	94	139	183
1031	RUN1502	La Réunion	Mascarenes	REU014	-20.980092	55.662855	2012-02-21	P. Turpin	P0Q	A1	x	A	214	214	100	102	177	181	136	147	133	134	128	156	184	184	106	106	216	216	169	169	111	111	233	243	94	102	133	139
1032	RUN0107	La Réunion	Mascarenes	REU015	-21.0052	55.6289	2011-12-13	M. Techer, J. Clemencet	P0Q	A1	x	A	214	218	92	102	179	181	136	146	133	134	128	166	184	202	106	110	216	224	165	169	107	111	239	239	94	102	141	179
1033	RUN0108	La Réunion	Mascarenes	REU015	-21.0052	55.6289	2011-12-13	M. Techer, J. Clemencet	P0Q	A1	x	A	212	214	96	102	181	181	136	136	133	134	142	158	184	184	110	110	230	230	169	181	111	111	235	237	94	102	129	141
1034	RUN0109	La Réunion	Mascarenes	REU015	-21.0052	55.6289	2011-12-13	M. Techer, J. Clemencet	P0Q	A1	A1_MAD3	A	210	210	102	102	175	177	136	136	133	134	128	128	184	184	106	106	230	230	165	169	94	107	235	247	94	102	179	179
1035	RUN0110	La Réunion	Mascarenes	REU015	-21.0052	55.6289	2011-12-13	M. Techer, J. Clemencet	P0Q	A1	x	A	210	214	96	100	177	181	140	149	132	134	128	146	184	232	106	110	220	230	169	169	107	111	237	237	102	102	133	141
1036	RUN0111	La Réunion	Mascarenes	REU015	-21.0052	55.6289	2011-12-13	M. Techer, J. Clemencet	P0Q	A1	x	A	210	210	96	100	181	181	136	136	134	134	148	158	184	234	110	110	230	230	177	177	94	94	233	235	102	102	177	179
1037	RUN1297	La Réunion	Mascarenes	REU016	-21.002683	55.689267	2012-02-01	T. François, M. Techer	P0Q	A1	x	A	210	226	100	102	181	181	149	149	133	134	156	164	184	214	106	110	216	216	175	177	94	111	243	243	102	104	141	141
1038	RUN1298	La Réunion	Mascarenes	REU016	-21.002683	55.689267	2012-02-01	T. François, M. Techer	P0Q	A1	x	A	210	212	100	100	181	181	149	149	133	133	156	164	184	184	106	106	216	230	165	175	94	107	233	243	100	100	141	141
1039	RUN1299	La Réunion	Mascarenes	REU016	-21.002683	55.689267	2012-02-01	T. François, M. Techer	P0Q	A1	x	A	212	214	102	102	175	181	136	149	133	134	128	156	184	234	110	110	216	236	169	181	NA	NA	NA	NA	NA	NA	NA	NA
1040	RUN1300	La Réunion	Mascarenes	REU016	-21.002683	55.689267	2012-02-01	T. François, M. Techer	P0Q	A1	x	A	210	210	96	102	181	181	136	149	132	134	128	131	184	184	106	110	212	220	NA	NA	NA	NA	NA	NA	NA	NA	NA	NA
1041	RUN1301_2	La Réunion	Mascarenes	REU016	-21.002683	55.689267	2012-02-01	T. François, M. Techer	P0Q	A1	x	A	210	210	96	102	181	181	147	149	132	133	128	142	184	202	110	110	224	230	169	169	94	110	237	239	94	102	133	177
1042	RUN1302_2	La Réunion	Mascarenes	REU016	-21.002683	55.689267	2012-02-01	T. François, M. Techer	P0Q	A1	x	A	210	214	96	102	175	177	136	149	134	134	128	164	174	184	106	110	220	230	169	177	94	111	233	241	94	94	129	179
1043	RUN1303	La Réunion	Mascarenes	REU016	-21.002683	55.689267	2012-02-01	T. François, M. Techer	P0Q	A1	x	A	210	226	102	102	175	177	136	149	132	134	128	128	184	184	110	110	216	216	177	181	94	107	239	241	94	94	179	183
1044	RUN1304	La Réunion	Mascarenes	REU016	-21.002683	55.689267	2012-02-01	T. François, M. Techer	P0Q	A1	x	A	210	218	92	96	181	181	136	147	132	134	126	128	184	184	106	110	222	230	169	169	107	110	233	241	94	102	149	177
1045	RUN1305	La Réunion	Mascarenes	REU016	-21.002683	55.689267	2012-02-01	T. François, M. Techer	P0Q	A1	x	A	210	210	96	102	177	181	136	140	133	134	128	128	184	232	106	106	220	222	177	181	94	111	233	241	94	102	133	139
1046	RUN0011	La Réunion	Mascarenes	REU017	-21.029733	55.698467	2011-12-12	M. Techer, J. Clemencet	P0Q	A1	x	A	210	210	100	102	179	181	136	149	128	134	128	128	184	184	106	106	216	216	169	169	94	116	233	237	94	102	139	177
1047	RUN0012	La Réunion	Mascarenes	REU017	-21.029733	55.698467	2011-12-12	M. Techer, J. Clemencet	P0Q	A1	x	A	210	214	102	102	177	181	136	149	133	134	128	128	184	184	110	110	218	220	165	169	111	116	233	239	94	102	141	189
1048	RUN0013	La Réunion	Mascarenes	REU017	-21.029733	55.698467	2011-12-12	M. Techer, J. Clemencet	P0Q	A1	A1_MAD3	A	210	210	102	102	177	181	136	136	133	134	128	131	184	184	110	110	216	218	169	169	111	111	231	233	102	102	133	141
1049	RUN0014	La Réunion	Mascarenes	REU017	-21.029733	55.698467	2011-12-12	M. Techer, J. Clemencet	P0Q	A1	x	A	210	218	102	102	181	181	147	149	134	134	128	128	184	184	106	106	222	230	165	177	94	111	233	233	94	102	139	139
1050	RUN0015	La Réunion	Mascarenes	REU017	-21.029733	55.698467	2011-12-12	M. Techer, J. Clemencet	P0Q	A1	x	A	210	210	100	100	175	181	136	149	133	134	128	128	184	184	106	106	216	222	169	179	92	111	233	235	102	102	133	175
1051	RUN1155	La Réunion	Mascarenes	REU018	-21.034267	55.673683	2012-01-30	T. François	P0Q	A1	x	A	210	214	96	100	177	181	147	149	133	134	128	128	184	184	106	110	230	232	169	175	111	116	235	241	94	102	177	179
1052	RUN1186	La Réunion	Mascarenes	REU019	-21.038583	55.667783	2012-01-30	T. François	P0Q	A1	x	A	210	212	100	102	177	181	149	149	134	134	154	162	184	232	106	110	230	236	169	183	94	111	233	239	102	102	NA	NA
1053	RUN1187	La Réunion	Mascarenes	REU019	-21.038583	55.667783	2012-01-30	T. François	P0Q	A1	x	A	210	226	100	102	175	181	149	149	133	133	158	162	184	184	110	110	216	230	165	169	94	107	233	237	94	102	141	141
1054	RUN1188	La Réunion	Mascarenes	REU019	-21.038583	55.667783	2012-01-30	T. François	P0Q	A1	x	A	214	218	96	96	179	179	136	149	132	134	128	154	184	184	106	110	218	230	165	165	107	111	239	239	100	100	143	181
1055	RUN1189	La Réunion	Mascarenes	REU019	-21.038583	55.667783	2012-01-30	T. François	P0Q	A1	x	A	210	214	102	102	175	181	136	149	134	134	131	158	184	184	110	110	216	230	169	179	94	111	237	243	100	100	133	139
1056	RUN1190	La Réunion	Mascarenes	REU019	-21.038583	55.667783	2012-01-30	T. François	P0Q	A1	x	A	210	214	100	100	181	181	149	149	133	134	128	131	184	234	106	110	230	230	169	179	107	111	235	235	100	100	173	179
1057	RUN1191	La Réunion	Mascarenes	REU019	-21.038583	55.667783	2012-01-30	T. François	P0Q	A1	x	A	210	214	100	102	179	181	149	149	133	134	150	156	184	184	110	110	230	230	169	169	107	111	235	239	102	102	139	139
1058	RUN1192	La Réunion	Mascarenes	REU019	-21.038583	55.667783	2012-01-30	T. François	P0Q	A1	x	A	210	214	96	100	177	181	149	149	133	134	154	156	184	234	106	110	220	234	169	177	107	107	NA	NA	94	104	NA	NA
1059	RUN1193_2	La Réunion	Mascarenes	REU019	-21.038583	55.667783	2012-01-30	T. François	P0Q	A1	x	A	214	216	96	100	181	181	147	149	133	134	128	154	184	184	106	110	230	230	169	169	94	111	225	233	100	102	177	185
1060	RUN1194	La Réunion	Mascarenes	REU019	-21.038583	55.667783	2012-01-30	T. François	P0Q	A1	x	A	210	212	96	102	181	181	147	149	133	134	NA	NA	NA	NA	110	110	230	232	169	181	94	107	225	233	94	102	139	141
1061	RUN1195	La Réunion	Mascarenes	REU019	-21.038583	55.667783	2012-01-30	T. François	P0Q	A1	x	A	210	210	100	100	181	181	136	136	133	134	128	156	184	234	106	110	216	230	177	181	110	111	235	239	94	94	141	179
1062	RUN1196	La Réunion	Mascarenes	REU019	-21.038583	55.667783	2012-01-30	T. François	P0Q	A1	x	A	210	210	102	102	181	181	136	149	132	134	128	128	174	184	106	110	220	232	169	169	92	94	231	233	94	102	129	139
1063	RUN1197	La Réunion	Mascarenes	REU019	-21.038583	55.667783	2012-01-30	T. François	P0Q	A1	A1_MAD3	A	210	218	100	102	181	181	136	136	133	134	128	128	174	232	106	110	216	230	169	179	94	94	235	235	94	102	139	139
1064	RUN1198	La Réunion	Mascarenes	REU019	-21.038583	55.667783	2012-01-30	T. François	P0Q	A1	x	A	210	214	96	102	179	181	136	136	128	134	126	128	184	184	106	110	232	234	169	177	107	107	NA	NA	94	94	141	147
1065	RUN1199	La Réunion	Mascarenes	REU019	-21.038583	55.667783	2012-01-30	T. François	P0Q	A1	x	A	214	218	96	100	175	181	147	149	133	134	128	162	184	184	106	106	222	230	165	169	94	111	NA	NA	94	102	141	141
1066	RUN1200	La Réunion	Mascarenes	REU019	-21.038583	55.667783	2012-01-30	T. François	P0Q	A1	x	A	214	218	96	102	181	181	136	149	133	134	128	128	184	184	110	110	216	232	169	177	94	111	NA	NA	102	102	141	141
1067	RUN1201	La Réunion	Mascarenes	REU019	-21.038583	55.667783	2012-01-30	T. François	P0Q	A1	x	A	210	212	96	96	177	181	147	149	133	133	128	162	184	234	106	106	220	224	169	169	111	111	231	233	94	102	141	183
1068	RUN1202	La Réunion	Mascarenes	REU019	-21.038583	55.667783	2012-01-30	T. François	P0Q	A1	x	A	NA	NA	NA	NA	NA	NA	136	136	133	134	132	148	184	184	106	106	230	230	169	181	107	111	235	235	102	102	133	177
1069	RUN1203	La Réunion	Mascarenes	REU019	-21.038583	55.667783	2012-01-30	T. François	P0Q	A1	x	A	214	214	102	102	177	181	136	149	133	134	148	156	184	234	106	110	218	230	165	169	92	111	235	239	100	100	133	177
1070	RUN1204	La Réunion	Mascarenes	REU019	-21.038583	55.667783	2012-01-30	T. François	P0Q	A1	x	A	210	210	96	102	NA	NA	NA	NA	132	132	128	156	184	184	106	106	220	222	169	181	94	107	239	251	94	102	133	139
1071	RUN1205	La Réunion	Mascarenes	REU019	-21.038583	55.667783	2012-01-30	T. François	P0Q	A1	x	A	210	226	100	102	177	181	136	136	132	134	128	128	184	184	110	110	230	230	169	169	92	111	233	249	94	94	141	179
1072	RUN1206	La Réunion	Mascarenes	REU019	-21.038583	55.667783	2012-01-30	T. François	P0Q	A1	x	A	214	218	102	102	181	181	136	149	132	134	131	131	184	184	106	106	222	230	169	169	92	111	NA	NA	94	94	141	141
1073	RUN1207	La Réunion	Mascarenes	REU019	-21.038583	55.667783	2012-01-30	T. François	P0Q	A1	x	A	210	218	102	102	177	177	140	149	133	134	128	146	184	184	106	106	218	232	169	181	111	111	233	239	94	102	139	177
1074	RUN1208	La Réunion	Mascarenes	REU019	-21.038583	55.667783	2012-01-30	T. François	P0Q	A1	x	A	210	218	96	100	181	181	147	147	134	134	128	140	228	234	106	106	216	230	165	177	111	111	233	233	94	102	133	177
1075	RUN1209	La Réunion	Mascarenes	REU019	-21.038583	55.667783	2012-01-30	T. François	P0Q	A1	x	A	210	212	100	102	181	181	147	149	132	133	156	156	184	234	110	110	216	220	169	169	92	107	235	237	100	102	139	181
1076	RUN1210	La Réunion	Mascarenes	REU019	-21.038583	55.667783	2012-01-30	T. François	P0Q	A1	x	A	214	214	100	102	179	181	147	147	133	134	128	156	184	184	106	110	216	222	165	165	111	111	233	233	94	94	133	133
1077	RUN1211	La Réunion	Mascarenes	REU019	-21.038583	55.667783	2012-01-30	T. François	P0Q	A1	x	A	210	214	96	102	175	181	147	147	133	133	128	158	184	232	106	110	222	230	169	177	94	107	233	237	94	104	149	183
1078	RUN1212	La Réunion	Mascarenes	REU019	-21.038583	55.667783	2012-01-30	T. François	P0Q	A1	x	A	210	216	102	102	179	181	136	136	134	134	128	162	184	184	106	110	230	230	165	169	111	111	233	235	92	100	139	181
1079	RUN1213	La Réunion	Mascarenes	REU019	-21.038583	55.667783	2012-01-30	T. François	P0Q	A1	x	A	210	212	96	102	177	177	147	147	133	134	128	128	184	234	106	110	230	234	175	181	111	111	233	235	100	100	139	179
1080	RUN1214	La Réunion	Mascarenes	REU019	-21.038583	55.667783	2012-01-30	T. François	P0Q	A1	A1_MAD3	A	210	214	102	102	177	179	149	149	133	134	128	156	184	184	110	110	222	230	165	177	107	111	237	239	94	102	177	179
1081	RUN1215	La Réunion	Mascarenes	REU019	-21.038583	55.667783	2012-01-30	T. François	P0Q	A1	x	A	210	210	96	102	177	177	149	149	132	132	128	146	184	184	106	106	216	230	165	181	94	111	233	239	94	102	133	149
1082	RUN1216	La Réunion	Mascarenes	REU019	-21.038583	55.667783	2012-01-30	T. François	P0Q	A1	x	A	210	210	102	102	177	181	149	149	133	134	128	146	184	184	110	110	230	230	NA	NA	NA	NA	NA	NA	NA	NA	NA	NA
1083	RUN1156	La Réunion	Mascarenes	REU020	-21.048833	55.659467	2012-01-30	T. François	P0Q	A1	x	A	212	214	96	102	177	191	136	149	132	134	128	154	186	186	106	110	218	222	165	169	94	111	233	235	94	102	139	177
1084	RUN1157	La Réunion	Mascarenes	REU020	-21.048833	55.659467	2012-01-30	T. François	P0Q	A1	A1_MAD3	A	210	212	96	102	175	175	147	149	133	134	128	160	220	232	106	110	222	232	169	169	94	107	233	241	100	100	139	177
1085	RUN1158	La Réunion	Mascarenes	REU020	-21.048833	55.659467	2012-01-30	T. François	P0Q	A1	x	A	198	218	96	102	179	181	149	149	134	134	128	128	184	184	106	110	230	230	169	181	94	111	233	233	100	100	133	179
1086	RUN1159	La Réunion	Mascarenes	REU020	-21.048833	55.659467	2012-01-30	T. François	P0Q	A1	x	A	214	214	100	102	175	177	147	147	133	133	128	128	184	184	106	106	230	236	169	181	107	107	235	239	94	102	133	179
1087	RUN1160	La Réunion	Mascarenes	REU020	-21.048833	55.659467	2012-01-30	T. François	P0Q	A1	x	A	218	228	102	102	175	181	149	149	133	134	128	128	174	234	106	106	230	230	169	181	111	111	233	239	102	102	139	175
1088	RUN1161	La Réunion	Mascarenes	REU020	-21.048833	55.659467	2012-01-30	T. François	P0Q	A1	x	A	198	210	102	102	177	181	147	149	134	134	146	152	184	184	106	110	218	220	169	177	111	111	233	239	102	102	133	139
1089	RUN1162	La Réunion	Mascarenes	REU020	-21.048833	55.659467	2012-01-30	T. François	P0Q	A1	x	A	216	220	102	102	NA	NA	136	149	134	134	128	152	184	184	106	110	220	232	169	177	111	111	235	237	94	102	129	141
1090	RUN1163	La Réunion	Mascarenes	REU020	-21.048833	55.659467	2012-01-30	T. François	P0Q	A1	x	A	210	210	100	102	175	179	136	147	128	133	128	128	184	238	106	106	216	230	169	169	110	111	235	239	94	94	179	179
1091	RUN1164	La Réunion	Mascarenes	REU020	-21.048833	55.659467	2012-01-30	T. François	P0Q	A1	x	A	210	210	100	100	181	181	149	149	134	134	128	128	184	238	106	110	230	232	169	181	94	107	225	235	100	100	177	179
1092	RUN1165	La Réunion	Mascarenes	REU020	-21.048833	55.659467	2012-01-30	T. François	P0Q	A1	x	A	210	214	102	102	177	181	136	149	133	134	NA	NA	NA	NA	106	106	216	220	169	177	107	111	233	239	94	104	141	141
1093	RUN1166	La Réunion	Mascarenes	REU020	-21.048833	55.659467	2012-01-30	T. François	P0Q	A1	x	A	210	212	96	102	181	181	147	147	133	134	128	144	184	184	106	106	220	222	169	181	107	111	235	235	94	94	141	149
1094	RUN1167	La Réunion	Mascarenes	REU020	-21.048833	55.659467	2012-01-30	T. François	P0Q	A1	x	A	210	214	100	102	179	181	136	149	133	134	128	128	184	232	106	110	230	232	165	169	110	116	239	239	94	94	129	179
1095	RUN1168	La Réunion	Mascarenes	REU020	-21.048833	55.659467	2012-01-30	T. François	P0Q	A1	x	A	210	210	100	102	179	181	136	149	134	134	128	128	184	184	106	106	230	230	NA	NA	NA	NA	NA	NA	NA	NA	NA	NA
1096	RUN1169	La Réunion	Mascarenes	REU020	-21.048833	55.659467	2012-01-30	T. François	P0Q	A1	x	A	210	210	102	102	175	181	147	149	133	134	132	154	184	184	110	110	218	222	NA	NA	NA	NA	NA	NA	NA	NA	NA	NA
1097	RUN1170	La Réunion	Mascarenes	REU020	-21.048833	55.659467	2012-01-30	T. François	P0Q	A1	x	A	210	218	100	102	177	179	136	136	133	133	128	154	184	184	106	106	222	230	169	169	111	111	233	235	94	102	177	179
1098	RUN1171_2	La Réunion	Mascarenes	REU020	-21.048833	55.659467	2012-01-30	T. François	P0Q	A1	x	A	210	218	96	102	181	181	136	149	133	133	128	158	184	184	106	110	220	230	169	169	94	111	233	249	94	94	139	139
1099	RUN1172_2	La Réunion	Mascarenes	REU020	-21.048833	55.659467	2012-01-30	T. François	P0Q	A1	x	A	210	210	96	100	181	181	136	136	133	134	146	162	184	202	110	110	216	230	165	169	111	111	233	235	102	102	149	179
1100	RUN1173	La Réunion	Mascarenes	REU020	-21.048833	55.659467	2012-01-30	T. François	P0Q	A1	x	A	218	222	92	102	177	181	149	152	134	134	160	162	184	184	106	110	222	226	169	181	94	107	235	239	94	104	141	181
1101	RUN1174	La Réunion	Mascarenes	REU020	-21.048833	55.659467	2012-01-30	T. François	P0Q	A1	x	A	210	212	102	102	181	181	136	149	133	134	146	146	174	184	106	106	218	234	169	179	NA	NA	NA	NA	NA	NA	NA	NA
1102	RUN1175	La Réunion	Mascarenes	REU020	-21.048833	55.659467	2012-01-30	T. François	P0Q	A1	x	A	210	210	96	100	181	181	136	136	133	133	128	162	184	184	106	110	230	232	169	179	111	111	225	239	102	104	177	177
1103	RUN1176_2	La Réunion	Mascarenes	REU020	-21.048833	55.659467	2012-01-30	T. François	P0Q	A1	A1_MAD3	A	210	210	100	102	181	181	147	149	134	134	128	140	184	184	106	110	216	230	177	183	92	111	235	237	102	102	139	177
1104	RUN1177	La Réunion	Mascarenes	REU020	-21.048833	55.659467	2012-01-30	T. François	P0Q	A1	x	A	210	214	102	102	177	181	136	149	132	134	146	162	184	184	110	110	216	220	NA	NA	NA	NA	NA	NA	NA	NA	NA	NA
1105	RUN1178	La Réunion	Mascarenes	REU020	-21.048833	55.659467	2012-01-30	T. François	P0Q	A1	x	A	210	214	96	102	181	181	136	149	133	134	128	128	184	184	106	106	214	222	169	169	107	111	233	237	92	100	175	183
1106	RUN1179	La Réunion	Mascarenes	REU020	-21.048833	55.659467	2012-01-30	T. François	P0Q	A1	x	A	212	212	100	102	175	181	136	136	128	134	128	148	184	184	106	110	218	232	169	175	107	111	237	239	94	102	135	185
1107	RUN1180	La Réunion	Mascarenes	REU020	-21.048833	55.659467	2012-01-30	T. François	P0Q	A1	x	A	212	214	96	100	177	181	136	149	133	133	128	154	174	184	106	110	218	232	169	175	94	111	231	237	100	100	139	141
1108	RUN1181	La Réunion	Mascarenes	REU020	-21.048833	55.659467	2012-01-30	T. François	P0Q	A1	A1_MAD3	A	212	214	102	102	175	181	149	151	133	134	128	130	184	202	106	110	216	222	165	169	94	107	233	237	94	102	NA	NA
1109	RUN1182	La Réunion	Mascarenes	REU020	-21.048833	55.659467	2012-01-30	T. François	P0Q	A1	x	A	214	214	96	100	177	181	146	147	133	133	128	128	174	184	106	110	216	216	169	169	107	111	233	239	94	94	141	177
1110	RUN1183	La Réunion	Mascarenes	REU020	-21.048833	55.659467	2012-01-30	T. François	P0Q	A1	x	A	214	218	100	102	181	181	136	149	132	133	128	162	184	202	110	110	216	230	177	181	94	107	233	233	100	100	143	177
1111	RUN1184	La Réunion	Mascarenes	REU020	-21.048833	55.659467	2012-01-30	T. François	P0Q	A1	x	A	210	218	100	102	181	181	149	149	133	134	128	144	184	184	106	110	216	220	179	183	94	111	239	239	102	102	133	139
1112	RUN1185	La Réunion	Mascarenes	REU020	-21.048833	55.659467	2012-01-30	T. François	P0Q	A1	x	A	210	210	96	102	179	181	136	149	128	134	154	162	184	232	106	106	216	230	NA	NA	107	107	NA	NA	102	102	NA	NA
1113	RUN0850	La Réunion	Mascarenes	REU021	-21.042267	55.6866	2012-01-19	T. François	P0Q	A1	x	A	214	214	102	102	181	181	136	147	132	134	128	128	174	234	110	110	232	232	169	169	94	107	235	237	94	102	147	177
1114	RUN0851	La Réunion	Mascarenes	REU021	-21.042267	55.6866	2012-01-19	T. François	P0Q	A1	x	A	210	212	100	102	179	181	149	149	132	133	142	142	232	232	106	110	220	230	169	169	107	111	NA	NA	94	102	141	141
1115	RUN0852	La Réunion	Mascarenes	REU021	-21.042267	55.6866	2012-01-19	T. François	P0Q	A1	x	A	210	222	96	102	177	177	136	149	133	134	128	140	184	184	106	110	230	232	169	183	111	111	233	239	100	102	139	181
1116	RUN0853	La Réunion	Mascarenes	REU021	-21.042267	55.6866	2012-01-19	T. François	P0Q	A1	A1_MAD3	A	210	214	100	102	175	177	136	136	133	134	128	128	184	234	106	106	230	230	169	177	107	111	NA	NA	94	102	NA	NA
1117	RUN0854	La Réunion	Mascarenes	REU021	-21.042267	55.6866	2012-01-19	T. François	P0Q	A1	x	A	210	218	100	102	179	181	147	149	133	133	128	148	184	184	106	110	230	232	169	169	94	116	241	241	102	102	141	181
1118	RUN0855	La Réunion	Mascarenes	REU021	-21.042267	55.6866	2012-01-19	T. François	P0Q	A1	x	A	218	226	102	102	177	181	147	149	133	133	128	152	184	184	110	110	220	232	169	169	107	111	233	237	94	102	177	177
1119	RUN0856	La Réunion	Mascarenes	REU021	-21.042267	55.6866	2012-01-19	T. François	P0Q	A1	x	A	210	210	100	102	179	181	149	149	133	134	128	140	184	212	106	106	218	230	169	177	107	110	239	243	102	102	139	141
1120	RUN0857	La Réunion	Mascarenes	REU021	-21.042267	55.6866	2012-01-19	T. François	P0Q	A1	x	A	210	214	102	102	179	181	136	149	133	134	128	128	184	184	110	110	216	232	165	179	107	111	233	239	94	102	139	181
1121	RUN0858	La Réunion	Mascarenes	REU021	-21.042267	55.6866	2012-01-19	T. François	P0Q	A1	x	A	210	214	96	102	179	179	136	147	134	134	128	154	184	234	106	110	216	216	169	179	92	107	233	243	94	102	129	177
1122	RUN0859	La Réunion	Mascarenes	REU021	-21.042267	55.6866	2012-01-19	T. François	P0Q	A1	x	A	212	218	96	102	179	181	149	149	133	134	128	146	184	184	106	110	230	230	169	169	107	111	233	233	94	102	149	181
1123	RUN0860	La Réunion	Mascarenes	REU021	-21.042267	55.6866	2012-01-19	T. François	P0Q	A1	x	A	210	210	100	102	179	181	136	149	128	133	128	128	184	234	110	110	230	232	165	169	92	111	237	239	94	94	177	177
1124	RUN0861	La Réunion	Mascarenes	REU021	-21.042267	55.6866	2012-01-19	T. François	P0Q	A1	x	A	212	214	100	100	177	179	140	147	134	134	128	154	184	202	110	110	222	234	169	177	107	111	233	239	102	102	139	147
1125	RUN0862	La Réunion	Mascarenes	REU021	-21.042267	55.6866	2012-01-19	T. François	P0Q	A1	x	A	212	218	100	102	179	181	147	149	132	132	128	140	184	184	106	110	216	230	169	179	107	107	233	237	94	102	143	181
1126	RUN0863	La Réunion	Mascarenes	REU021	-21.042267	55.6866	2012-01-19	T. François	P0Q	A1	x	A	210	210	100	102	179	181	136	149	133	134	140	156	184	184	110	110	222	232	169	169	92	94	233	235	94	94	129	139
1127	RUN0864	La Réunion	Mascarenes	REU021	-21.042267	55.6866	2012-01-19	T. François	P0Q	A1	x	A	210	214	102	102	177	181	136	149	133	133	128	164	184	184	106	106	220	232	169	169	107	111	239	247	94	94	129	141
1128	RUN0865	La Réunion	Mascarenes	REU021	-21.042267	55.6866	2012-01-19	T. François	P0Q	A1	x	A	210	222	96	102	177	181	136	147	134	134	128	128	184	184	110	110	220	220	165	169	111	116	235	243	94	102	133	177
1129	RUN0866	La Réunion	Mascarenes	REU021	-21.042267	55.6866	2012-01-19	T. François	P0Q	A1	x	A	210	218	96	102	181	181	136	147	133	134	145	145	184	184	106	106	NA	NA	169	169	94	111	233	239	94	102	141	141
1130	RUN0867	La Réunion	Mascarenes	REU021	-21.042267	55.6866	2012-01-19	T. François	P0Q	A1	x	A	224	228	102	102	175	181	136	147	132	133	128	140	184	184	106	106	232	232	165	179	107	110	235	237	94	94	175	175
1131	RUN0868	La Réunion	Mascarenes	REU021	-21.042267	55.6866	2012-01-19	T. François	P0Q	A1	x	A	210	228	96	100	181	181	136	149	133	134	140	162	184	184	106	110	232	232	165	169	107	110	NA	NA	94	100	NA	NA
1132	RUN0869	La Réunion	Mascarenes	REU021	-21.042267	55.6866	2012-01-19	T. François	P0Q	A1	x	A	210	214	92	96	177	179	149	149	132	134	156	156	184	184	110	110	NA	NA	169	181	94	111	235	241	102	102	139	171
1133	RUN0870	La Réunion	Mascarenes	REU021	-21.042267	55.6866	2012-01-19	T. François	P0Q	A1	x	A	210	214	96	102	175	181	149	149	132	133	128	156	184	184	106	110	230	230	169	181	107	119	NA	NA	94	94	129	129
1134	RUN0871	La Réunion	Mascarenes	REU021	-21.042267	55.6866	2012-01-19	T. François	P0Q	A1	x	A	212	218	100	102	179	179	149	149	132	134	128	128	184	184	106	110	216	230	169	177	112	113	225	237	94	94	141	141
1135	RUN0872	La Réunion	Mascarenes	REU021	-21.042267	55.6866	2012-01-19	T. François	P0Q	A1	x	A	210	210	100	102	175	181	147	149	133	134	128	154	184	184	106	110	220	230	169	169	111	113	225	233	94	102	177	181
1136	RUN0873	La Réunion	Mascarenes	REU021	-21.042267	55.6866	2012-01-19	T. François	P0Q	A1	x	A	210	214	100	102	179	181	147	147	133	134	128	140	184	184	106	106	216	236	169	181	94	111	235	239	94	102	129	179
1137	RUN0874	La Réunion	Mascarenes	REU021	-21.042267	55.6866	2012-01-19	T. François	P0Q	A1	x	A	210	210	92	102	181	181	149	149	128	134	128	128	184	184	106	106	220	230	169	175	94	94	239	243	94	102	149	149
1138	RUN0875_2	La Réunion	Mascarenes	REU021	-21.042267	55.6866	2012-01-19	T. François	P0Q	A1	A1_MAD3	A	210	210	96	102	177	181	149	149	132	134	128	156	184	184	106	110	230	232	169	177	94	110	233	249	102	104	177	179
1139	RUN0876	La Réunion	Mascarenes	REU021	-21.042267	55.6866	2012-01-19	T. François	P0Q	A1	x	A	210	218	96	96	175	177	136	149	132	133	128	131	184	184	106	106	218	230	169	169	94	111	NA	NA	94	94	129	129
1140	RUN0877	La Réunion	Mascarenes	REU021	-21.042267	55.6866	2012-01-19	T. François	P0Q	A1	x	A	214	214	102	102	181	181	136	140	132	134	128	144	184	184	110	110	222	230	169	169	94	116	233	235	94	102	141	141
1141	RUN0878	La Réunion	Mascarenes	REU021	-21.042267	55.6866	2012-01-19	T. François	P0Q	A1	x	A	218	222	102	102	175	181	136	147	133	134	128	128	184	184	106	110	220	232	169	169	107	111	235	239	94	94	129	141
1142	RUN0879	La Réunion	Mascarenes	REU021	-21.042267	55.6866	2012-01-19	T. François	P0Q	A1	x	A	218	218	100	100	175	181	147	147	134	134	128	130	232	232	106	106	218	230	169	169	94	107	233	239	94	102	129	149
1143	RUN0880	La Réunion	Mascarenes	REU021	-21.042267	55.6866	2012-01-19	T. François	P0Q	A1	x	A	214	224	102	102	181	181	136	147	132	134	156	160	184	232	106	110	216	230	169	169	107	111	229	233	94	102	133	147
1144	RUN0881	La Réunion	Mascarenes	REU021	-21.042267	55.6866	2012-01-19	T. François	P0Q	A1	x	A	214	218	100	102	179	181	136	149	132	134	146	166	184	184	106	110	218	220	169	177	110	111	233	239	102	102	131	181
1145	RUN0882	La Réunion	Mascarenes	REU021	-21.042267	55.6866	2012-01-19	T. François	P0Q	A1	x	A	210	210	96	100	181	187	147	149	128	133	128	160	184	184	110	110	218	218	165	175	94	107	239	239	94	102	149	179
1146	RUN0883	La Réunion	Mascarenes	REU021	-21.042267	55.6866	2012-01-19	T. François	P0Q	A1	x	A	210	210	96	102	175	181	147	149	128	134	128	156	184	234	110	110	220	222	169	181	107	111	239	243	94	102	129	139
1147	RUN0884	La Réunion	Mascarenes	REU021	-21.042267	55.6866	2012-01-19	T. François	P0Q	A1	x	A	210	210	100	100	175	177	147	147	128	132	128	162	184	184	106	110	230	232	165	169	94	107	225	233	94	94	129	147
1148	RUN0885	La Réunion	Mascarenes	REU021	-21.042267	55.6866	2012-01-19	T. François	P0Q	A1	x	A	210	218	100	102	181	181	147	149	133	133	128	128	184	184	110	110	216	232	177	181	107	111	239	243	94	94	139	179
1149	RUN0886	La Réunion	Mascarenes	REU021	-21.042267	55.6866	2012-01-19	T. François	P0Q	A1	x	A	210	210	96	100	181	181	140	149	133	134	128	140	202	202	106	110	220	230	169	177	94	107	237	241	94	94	129	177
1150	RUN0887	La Réunion	Mascarenes	REU021	-21.042267	55.6866	2012-01-19	T. François	P0Q	A1	x	A	214	214	92	100	181	181	140	147	133	134	162	164	184	184	106	106	216	216	179	181	NA	NA	NA	NA	NA	NA	NA	NA
1151	RUN0888	La Réunion	Mascarenes	REU021	-21.042267	55.6866	2012-01-19	T. François	P0Q	A1	x	A	212	214	102	102	179	181	147	149	133	134	128	128	234	234	110	110	230	232	169	169	111	111	233	237	102	102	129	139
1152	RUN0889	La Réunion	Mascarenes	REU021	-21.042267	55.6866	2012-01-19	T. François	P0Q	A1	x	A	210	222	96	102	179	181	136	151	133	133	128	140	184	232	106	106	NA	NA	169	181	94	111	233	249	94	94	141	177
1153	RUN0890	La Réunion	Mascarenes	REU021	-21.042267	55.6866	2012-01-19	T. François	P0Q	A1	x	A	210	218	102	102	179	181	136	149	128	133	140	146	184	232	106	110	218	230	169	169	94	111	233	237	102	102	141	183
1154	RUN0891	La Réunion	Mascarenes	REU021	-21.042267	55.6866	2012-01-19	T. François	P0Q	A1	x	A	210	222	96	102	179	181	136	151	133	133	128	140	184	232	106	110	230	232	169	169	94	111	233	249	94	94	141	177
1155	RUN0892	La Réunion	Mascarenes	REU021	-21.042267	55.6866	2012-01-19	T. François	P0Q	A1	x	A	210	210	96	96	181	181	149	149	132	133	128	128	184	184	106	106	230	232	169	169	92	111	233	237	94	102	173	175
1156	RUN0893	La Réunion	Mascarenes	REU021	-21.042267	55.6866	2012-01-19	T. François	P0Q	A1	x	A	210	210	96	102	181	183	136	149	133	133	128	142	184	232	106	106	230	232	169	169	111	111	233	245	94	102	175	181
1157	RUN0894	La Réunion	Mascarenes	REU021	-21.042267	55.6866	2012-01-19	T. François	P0Q	A1	x	A	210	210	100	100	175	183	136	147	133	133	128	146	184	234	106	106	216	218	169	179	107	111	NA	NA	94	94	NA	NA
1158	RUN0895	La Réunion	Mascarenes	REU021	-21.042267	55.6866	2012-01-19	T. François	P0Q	A1	x	A	210	212	96	102	179	181	140	149	132	134	128	166	184	184	106	110	216	226	169	177	NA	NA	NA	NA	NA	NA	NA	NA
1159	RUN0896	La Réunion	Mascarenes	REU021	-21.042267	55.6866	2012-01-19	T. François	P0Q	A1	x	A	212	218	96	102	181	181	147	149	133	134	128	166	184	232	106	106	216	230	177	177	107	111	235	235	102	102	141	181
1160	RUN0897	La Réunion	Mascarenes	REU021	-21.042267	55.6866	2012-01-19	T. François	P0Q	A1	x	A	210	224	96	102	177	181	149	152	134	134	128	154	184	184	106	110	222	230	169	181	92	111	233	239	94	102	129	179
1161	RUN0898	La Réunion	Mascarenes	REU021	-21.042267	55.6866	2012-01-19	T. François	P0Q	A1	x	A	210	210	96	102	179	181	147	149	132	134	128	166	184	184	106	110	226	232	169	169	107	111	235	235	94	102	141	179
1162	RUN0899	La Réunion	Mascarenes	REU021	-21.042267	55.6866	2012-01-19	T. François	P0Q	A1	x	A	210	226	96	102	177	191	136	149	134	134	128	152	184	184	110	110	218	230	169	169	107	119	235	239	102	102	139	143
1163	RUN0900	La Réunion	Mascarenes	REU021	-21.042267	55.6866	2012-01-19	T. François	P0Q	A1	x	A	210	218	92	96	179	181	136	136	134	134	128	152	184	184	106	106	216	232	169	175	111	111	239	239	94	102	139	141
1164	RUN0901	La Réunion	Mascarenes	REU021	-21.042267	55.6866	2012-01-19	T. François	P0Q	A1	x	A	210	226	102	102	181	181	136	149	133	134	128	152	184	184	106	110	216	232	169	169	107	111	237	247	94	102	141	179
1165	RUN0902	La Réunion	Mascarenes	REU021	-21.042267	55.6866	2012-01-19	T. François	P0Q	A1	x	A	210	212	96	100	181	183	136	149	133	134	128	128	184	184	106	106	216	230	179	179	92	111	233	235	94	94	141	149
1166	RUN0903	La Réunion	Mascarenes	REU021	-21.042267	55.6866	2012-01-19	T. François	P0Q	A1	x	A	210	216	102	102	181	181	137	149	133	134	128	142	184	184	106	110	230	230	169	177	NA	NA	NA	NA	NA	NA	NA	NA
1167	RUN0904	La Réunion	Mascarenes	REU021	-21.042267	55.6866	2012-01-19	T. François	P0Q	A1	x	A	210	214	102	102	177	181	136	149	133	134	128	156	184	232	106	110	220	230	169	169	92	94	233	233	102	102	129	147
1168	RUN0905	La Réunion	Mascarenes	REU021	-21.042267	55.6866	2012-01-19	T. François	P0Q	A1	x	A	218	218	102	102	181	181	149	149	134	134	128	128	184	184	106	110	218	218	169	181	94	113	233	247	102	104	177	185
1169	RUN0906	La Réunion	Mascarenes	REU021	-21.042267	55.6866	2012-01-19	T. François	P0Q	A1	x	A	210	218	102	102	175	181	136	149	134	134	128	128	184	232	106	110	216	218	169	181	94	113	233	247	102	104	177	185
1170	RUN0907	La Réunion	Mascarenes	REU021	-21.042267	55.6866	2012-01-19	T. François	P0Q	A1	x	A	210	222	96	100	181	181	140	149	132	133	128	128	184	184	106	110	220	220	169	175	107	107	233	237	102	102	133	147
1171	RUN0908	La Réunion	Mascarenes	REU021	-21.042267	55.6866	2012-01-19	T. François	P0Q	A1	x	A	210	214	102	102	175	181	147	149	133	134	142	146	184	184	106	110	216	230	169	175	107	111	235	235	102	102	139	141
1172	RUN0909	La Réunion	Mascarenes	REU021	-21.042267	55.6866	2012-01-19	T. François	P0Q	A1	x	A	198	216	100	102	177	179	147	149	132	134	128	146	184	184	106	110	216	232	165	169	107	110	233	249	102	102	149	181
1173	RUN0910	La Réunion	Mascarenes	REU021	-21.042267	55.6866	2012-01-19	T. François	P0Q	A1	x	A	210	218	96	102	177	181	136	149	134	134	128	154	184	184	106	106	220	230	169	169	107	111	233	241	82	94	141	177
1174	RUN0911	La Réunion	Mascarenes	REU021	-21.042267	55.6866	2012-01-19	T. François	P0Q	A1	x	A	210	218	96	102	177	181	136	149	134	134	128	154	184	184	106	106	220	230	169	169	94	107	NA	NA	82	94	NA	NA
1175	RUN0912	La Réunion	Mascarenes	REU021	-21.042267	55.6866	2012-01-19	T. François	P0Q	A1	x	A	210	218	96	102	181	181	136	149	133	134	128	146	184	184	106	110	218	230	169	169	107	111	233	243	82	102	141	177
1176	RUN0007	La Réunion	Mascarenes	REU022	-21.041767	55.687633	2011-12-12	M. Techer, J. Clemencet	P0Q	A1	x	A	210	228	100	102	181	183	147	149	NA	NA	NA	NA	NA	NA	106	106	NA	NA	169	177	107	111	235	235	94	102	139	141
1177	RUN0008	La Réunion	Mascarenes	REU022	-21.041767	55.687633	2011-12-12	M. Techer, J. Clemencet	P0Q	A1	A1_MAD3	A	210	214	100	102	181	181	147	149	133	134	128	160	184	184	106	106	216	230	169	177	107	107	233	233	94	94	141	179
1178	RUN0009	La Réunion	Mascarenes	REU022	-21.041767	55.687633	2011-12-12	M. Techer, J. Clemencet	P0Q	A1	x	A	210	214	100	100	181	181	149	149	132	134	128	128	184	184	106	106	216	232	175	177	108	111	233	249	94	102	141	179
1179	RUN0010	La Réunion	Mascarenes	REU022	-21.041767	55.687633	2011-12-12	M. Techer, J. Clemencet	P0Q	A1	x	A	212	214	102	102	181	181	147	149	133	133	128	166	184	184	106	106	230	230	177	177	94	111	235	241	94	94	129	141
1180	RUN1918	La Réunion	Mascarenes	REU023	-21.040813	55.689246	2012-10-16	P. Turpin	P0Q	A1	x	A	210	214	92	100	181	181	147	149	134	134	140	154	184	184	106	112	216	230	177	181	94	107	235	237	104	104	129	177
1181	RUN1922	La Réunion	Mascarenes	REU023	-21.040813	55.689246	2012-09-18	P. Turpin	P0Q	A1	x	A	210	210	102	102	177	181	147	149	132	133	146	158	184	232	106	110	218	220	169	179	111	111	239	241	94	102	139	183
1182	RUN1923	La Réunion	Mascarenes	REU023	-21.040813	55.689246	2012-10-16	P. Turpin	P0Q	A1	x	A	210	214	100	102	175	181	149	149	133	134	144	144	184	184	110	110	216	220	165	169	94	111	233	235	94	94	177	179
1183	RUN1924	La Réunion	Mascarenes	REU023	-21.040813	55.689246	2012-10-16	P. Turpin	P0Q	A1	x	A	210	214	92	100	181	181	136	149	133	134	128	128	184	184	106	106	230	230	169	177	111	111	233	235	94	104	175	177
1184	RUN1925	La Réunion	Mascarenes	REU023	-21.040813	55.689246	2012-10-16	P. Turpin	P0Q	A1	x	A	214	222	102	102	179	181	136	149	133	134	131	156	184	184	106	110	218	230	177	179	111	111	237	239	102	102	129	177
1185	RUN1926	La Réunion	Mascarenes	REU023	-21.040813	55.689246	2012-10-16	P. Turpin	P0Q	A1	x	A	210	214	96	102	NA	NA	140	147	133	134	128	146	184	184	110	110	216	218	165	169	94	111	233	255	94	102	141	163
1186	RUN1927	La Réunion	Mascarenes	REU023	-21.040813	55.689246	2012-09-18	P. Turpin	P0Q	A1	x	A	210	214	102	102	177	181	136	136	128	134	128	128	184	184	106	110	220	230	175	181	94	112	233	243	94	102	139	143
1187	RUN1928	La Réunion	Mascarenes	REU023	-21.040813	55.689246	2012-09-18	P. Turpin	P0Q	A1	x	A	210	214	96	102	177	177	136	149	132	134	128	150	184	184	110	110	220	220	175	178	94	111	233	249	94	94	133	141
1188	RUN1929	La Réunion	Mascarenes	REU023	-21.040813	55.689246	2012-10-16	P. Turpin	P0Q	A1	x	A	210	210	100	100	179	193	149	149	132	133	128	128	184	234	110	110	218	230	165	173	107	111	235	239	94	94	129	141
1189	RUN1930	La Réunion	Mascarenes	REU023	-21.040813	55.689246	2012-09-18	P. Turpin	P0Q	A1	x	A	210	210	100	102	181	183	149	149	133	134	128	156	184	184	106	110	218	230	165	179	107	111	233	235	102	102	139	141
1190	RUN1943	La Réunion	Mascarenes	REU023	-21.040813	55.689246	2012-09-18	P. Turpin	P0Q	A1	x	A	210	218	100	100	175	181	149	149	133	134	128	148	184	184	106	106	220	244	175	175	92	94	233	237	94	100	139	141
1191	RUN1944	La Réunion	Mascarenes	REU023	-21.040813	55.689246	2012-09-18	P. Turpin	P0Q	A1	x	A	210	210	100	102	179	181	147	149	128	134	128	164	184	206	106	110	222	232	177	179	94	119	237	243	94	94	129	183
1192	RUN1945	La Réunion	Mascarenes	REU023	-21.040813	55.689246	2012-10-16	P. Turpin	P0Q	A1	x	A	210	214	96	102	181	181	147	151	134	134	128	133	184	184	110	110	228	232	169	175	107	111	233	237	102	102	129	133
1193	RUN1946	La Réunion	Mascarenes	REU023	-21.040813	55.689246	2012-10-16	P. Turpin	P0Q	A1	x	A	210	214	100	100	177	181	147	149	134	134	126	128	184	232	106	110	218	230	169	179	94	111	233	239	94	102	179	185
1194	RUN1947	La Réunion	Mascarenes	REU023	-21.040813	55.689246	2012-09-18	P. Turpin	P0Q	A1	x	A	210	214	96	96	181	181	136	149	133	134	128	128	184	234	106	110	216	218	169	183	94	111	241	253	94	94	141	181
1195	RUN1950	La Réunion	Mascarenes	REU023	-21.040813	55.689246	2012-10-16	P. Turpin	P0Q	A1	x	A	206	212	92	102	175	181	149	149	132	134	128	156	184	184	106	110	226	230	169	169	107	111	225	229	94	102	177	179
1196	RUN1951	La Réunion	Mascarenes	REU023	-21.040813	55.689246	2012-10-16	P. Turpin	P0Q	A1	x	A	210	212	100	102	181	191	147	147	134	134	154	156	184	184	106	106	216	218	169	169	94	111	233	247	94	94	129	177
1197	RUN1952	La Réunion	Mascarenes	REU023	-21.040813	55.689246	2012-10-16	P. Turpin	P0Q	A1	x	A	214	220	102	102	181	183	136	147	134	134	128	144	184	184	106	110	220	228	169	169	107	107	237	249	94	94	133	179
1198	RUN1953	La Réunion	Mascarenes	REU023	-21.040813	55.689246	2012-10-16	P. Turpin	P0Q	A1	x	A	214	220	102	102	181	183	136	147	134	134	128	128	184	184	106	110	220	228	169	169	107	111	237	249	94	94	177	179
1199	RUN1954_2	La Réunion	Mascarenes	REU023	-21.040813	55.689246	2012-10-16	P. Turpin	P0Q	A1	x	A	214	228	92	102	177	181	149	149	134	134	128	160	184	232	106	110	230	230	169	169	94	107	233	233	94	102	133	185
1200	RUN1920	La Réunion	Mascarenes	REU023	-21.040813	55.689246	2012-10-16	P. Turpin	Q	C1-C2	C2_d	C	210	218	100	102	177	183	136	149	133	134	128	162	184	184	106	110	216	230	177	181	94	95	235	239	102	112	177	181
1201	RUN1919	La Réunion	Mascarenes	REU024	-21.046392	55.690811	2012-10-16	P. Turpin	P0Q	A1	x	A	210	210	100	102	181	181	149	149	133	133	126	128	184	184	106	106	216	232	169	169	107	111	225	233	94	102	139	139
1202	RUN1921	La Réunion	Mascarenes	REU024	-21.046392	55.690811	2012-10-16	P. Turpin	P0Q	A1	x	A	210	214	102	102	177	181	149	149	133	134	126	144	184	232	106	110	214	232	169	181	113	116	237	239	102	102	141	183
1203	RUN1933	La Réunion	Mascarenes	REU024	-21.046392	55.690811	2012-10-16	P. Turpin	P0Q	A1	x	A	210	214	102	102	181	181	147	149	133	133	128	160	184	184	106	106	216	234	169	181	94	107	235	239	102	102	177	177
1204	RUN1935	La Réunion	Mascarenes	REU024	-21.046392	55.690811	2012-10-16	P. Turpin	P0Q	A1	x	A	210	210	96	100	181	181	149	149	128	134	128	128	198	206	110	110	214	230	169	177	94	111	239	239	102	102	177	181
1205	RUN1939	La Réunion	Mascarenes	REU024	-21.046392	55.690811	2012-10-16	P. Turpin	P0Q	A1	x	A	210	210	96	102	181	181	136	147	132	134	128	128	184	184	106	106	216	220	169	169	111	111	231	239	102	104	129	183
1206	RUN1940	La Réunion	Mascarenes	REU024	-21.046392	55.690811	2012-10-16	P. Turpin	P0Q	A1	x	A	NA	NA	NA	NA	NA	NA	149	149	132	134	144	146	184	184	106	110	222	230	169	181	107	111	233	235	94	102	133	177
1207	RUN1941	La Réunion	Mascarenes	REU024	-21.046392	55.690811	2012-10-16	P. Turpin	P0Q	A1	x	A	212	218	100	102	177	181	149	149	132	134	144	166	174	184	106	110	216	232	165	165	94	111	231	237	94	102	129	141
1208	RUN1942	La Réunion	Mascarenes	REU024	-21.046392	55.690811	2012-10-16	P. Turpin	P0Q	A1	x	A	210	214	100	102	175	181	147	149	133	133	128	128	184	184	106	110	218	230	169	169	95	112	233	253	94	94	143	181
1209	RUN0744	La Réunion	Mascarenes	REU025	-21.054936	55.694660	2011-12-22	T. François	P0Q	A1	x	A	210	212	92	102	175	181	136	149	132	133	148	154	184	184	110	110	220	232	169	177	107	110	225	233	94	104	133	185
1210	RUN0745_2	La Réunion	Mascarenes	REU025	-21.054936	55.694660	2011-12-22	T. François	P0Q	A1	x	A	210	210	96	102	175	177	136	147	134	134	128	154	184	184	110	110	232	232	169	179	94	107	233	239	102	102	181	181
1211	RUN0746	La Réunion	Mascarenes	REU025	-21.054936	55.694660	2011-12-22	T. François	P0Q	A1	x	A	210	210	102	102	181	183	147	149	134	134	128	128	184	184	106	110	228	232	179	179	111	111	235	235	94	94	139	177
1212	RUN0748	La Réunion	Mascarenes	REU025	-21.054936	55.694660	2011-12-22	T. François	P0Q	A1	x	A	210	214	102	102	177	181	136	149	134	134	128	128	184	234	106	106	222	230	169	169	94	107	233	235	102	102	141	177
1213	RUN0749	La Réunion	Mascarenes	REU025	-21.054936	55.694660	2011-12-22	T. François	P0Q	A1	x	A	210	214	102	102	177	179	136	136	133	133	128	128	232	232	106	110	220	230	169	181	92	94	233	237	102	104	141	177
1214	RUN0750	La Réunion	Mascarenes	REU025	-21.054936	55.694660	2011-12-22	T. François	P0Q	A1	x	A	210	218	102	102	177	181	149	149	134	134	128	144	184	232	106	110	220	230	169	169	94	107	231	237	94	102	141	179
1215	RUN0751	La Réunion	Mascarenes	REU025	-21.054936	55.694660	2011-12-22	T. François	P0Q	A1	x	A	210	214	102	102	175	181	136	147	132	134	128	128	184	184	106	110	220	232	169	179	111	116	233	241	102	102	141	181
1216	RUN0752	La Réunion	Mascarenes	REU025	-21.054936	55.694660	2011-12-22	T. François	P0Q	A1	x	A	210	210	96	100	175	175	140	149	134	134	156	160	184	184	110	110	216	232	169	181	107	117	235	243	94	102	141	141
1217	RUN0753	La Réunion	Mascarenes	REU025	-21.054936	55.694660	2011-12-22	T. François	P0Q	A1	x	A	212	212	102	102	175	177	140	147	128	134	128	144	184	232	110	110	220	230	169	169	107	111	241	247	102	102	179	185
1218	RUN0754	La Réunion	Mascarenes	REU025	-21.054936	55.694660	2011-12-22	T. François	P0Q	A1	x	A	210	210	102	102	181	181	136	149	133	134	128	128	184	184	106	110	222	234	175	175	94	94	233	237	94	102	181	183
1219	RUN0755	La Réunion	Mascarenes	REU025	-21.054936	55.694660	2011-12-22	T. François	P0Q	A1	x	A	214	214	96	102	181	181	136	147	134	134	128	140	212	234	106	110	230	230	173	179	94	99	231	233	94	102	181	181
1220	RUN0756	La Réunion	Mascarenes	REU025	-21.054936	55.694660	2011-12-22	T. François	P0Q	A1	x	A	212	212	102	102	175	181	149	149	133	133	126	128	184	184	106	110	230	230	165	169	107	107	235	239	94	94	141	183
1221	RUN0757	La Réunion	Mascarenes	REU025	-21.054936	55.694660	2011-12-22	T. François	P0Q	A1	x	A	210	214	102	104	175	181	147	149	133	133	160	162	184	184	110	110	222	236	169	169	110	111	225	239	102	102	139	177
1222	RUN0758	La Réunion	Mascarenes	REU025	-21.054936	55.694660	2011-12-22	T. François	P0Q	A1	x	A	210	214	100	102	177	181	136	136	128	134	126	156	184	184	106	110	218	232	169	179	111	111	231	233	102	104	139	141
1223	RUN0759	La Réunion	Mascarenes	REU025	-21.054936	55.694660	2011-12-22	T. François	P0Q	A1	x	A	210	218	102	102	181	181	140	149	132	134	128	128	184	184	106	110	216	230	169	179	94	113	233	237	100	102	179	181
1224	RUN0760	La Réunion	Mascarenes	REU025	-21.054936	55.694660	2011-12-22	T. François	P0Q	A1	x	A	210	212	102	102	181	181	136	147	133	134	128	128	184	190	106	110	220	230	165	169	94	107	233	235	94	102	139	139
1225	RUN0762	La Réunion	Mascarenes	REU025	-21.054936	55.694660	2011-12-22	T. François	P0Q	A1	x	A	210	214	102	102	181	181	140	149	132	133	140	156	184	198	106	110	216	218	169	179	110	111	231	249	94	102	177	179
1226	RUN0763	La Réunion	Mascarenes	REU025	-21.054936	55.694660	2011-12-22	T. François	P0Q	A1	x	A	210	210	92	102	177	179	147	149	132	134	128	140	184	184	106	106	218	230	169	169	94	107	239	239	102	102	177	177
1227	RUN0766	La Réunion	Mascarenes	REU025	-21.054936	55.694660	2011-12-22	T. François	P0Q	A1	x	A	210	218	100	102	181	181	136	149	132	134	128	146	184	184	110	110	216	220	169	181	107	111	233	249	94	94	179	183
1228	RUN0767	La Réunion	Mascarenes	REU025	-21.054936	55.694660	2011-12-22	T. François	P0Q	A1	x	A	210	214	96	100	175	177	136	136	134	134	128	160	184	184	106	110	216	236	169	181	107	111	225	231	94	94	139	177
1229	RUN0768	La Réunion	Mascarenes	REU025	-21.054936	55.694660	2011-12-22	T. François	P0Q	A1	A1_MAD3	A	214	214	100	102	179	181	147	149	133	134	128	128	184	212	106	106	218	232	165	169	107	111	231	235	102	102	131	185
1230	RUN0769_2	La Réunion	Mascarenes	REU025	-21.054936	55.694660	2011-12-22	T. François	P0Q	A1	x	A	210	210	92	102	177	181	136	140	133	134	128	142	184	184	106	110	230	232	169	169	107	107	235	235	94	94	149	185
1231	RUN0770	La Réunion	Mascarenes	REU025	-21.054936	55.694660	2011-12-22	T. François	P0Q	A1	x	A	214	214	96	102	181	181	136	136	132	134	128	128	184	212	106	110	216	230	169	179	110	111	233	249	94	102	129	139
1232	RUN0747	La Réunion	Mascarenes	REU025	-21.054936	55.694660	2011-12-22	T. François	Q	C1-C2	C2_a	C	214	218	96	102	175	181	149	149	133	134	128	156	184	184	106	110	230	230	169	177	94	111	239	249	94	104	149	181
1233	RUN0761	La Réunion	Mascarenes	REU025	-21.054936	55.694660	2011-12-22	T. François	Q	C1-C2	C2_d	C	210	214	96	102	175	179	136	136	133	134	128	130	184	232	106	106	222	230	169	179	94	107	243	243	94	104	141	141
1234	RUN0764	La Réunion	Mascarenes	REU025	-21.054936	55.694660	2011-12-22	T. François	Q	C1-C2	C2_d	C	210	218	96	102	181	181	136	136	132	133	128	130	184	232	106	106	222	230	165	177	94	107	237	243	94	102	135	177
1235	RUN0765	La Réunion	Mascarenes	REU025	-21.054936	55.694660	2011-12-22	T. François	Q	C1-C2	C2_d	C	210	214	100	102	175	181	147	149	132	133	144	154	174	184	106	110	222	230	169	179	94	107	237	237	100	104	139	141
1236	RUN1931	La Réunion	Mascarenes	REU026	-21.072277	55.688557	2012-10-16	P. Turpin	P0Q	A1	x	A	210	218	96	100	181	183	149	149	134	134	126	154	184	216	106	110	216	232	165	169	107	107	235	249	94	102	177	185
1237	RUN1932	La Réunion	Mascarenes	REU026	-21.072277	55.688557	2012-10-16	P. Turpin	P0Q	A1	x	A	210	210	100	100	175	181	149	149	134	134	128	148	184	206	106	110	216	230	177	177	94	116	239	249	102	104	141	177
1238	RUN1934	La Réunion	Mascarenes	REU026	-21.072277	55.688557	2012-10-16	P. Turpin	P0Q	A1	x	A	210	218	96	102	181	181	136	149	133	134	128	142	184	184	106	110	216	232	169	181	92	94	233	239	94	102	139	183
1239	RUN1949	La Réunion	Mascarenes	REU026	-21.072277	55.688557	2012-10-16	P. Turpin	P0Q	A1	x	A	214	214	96	102	175	175	136	149	134	134	142	146	174	184	110	110	218	220	173	177	111	111	233	233	102	104	179	181
1240	RUN0003	La Réunion	Mascarenes	REU027	-21.0989	55.674283	2011-12-12	M. Techer, J. Clemencet	P0Q	A1	x	A	210	214	96	102	181	181	136	140	133	133	128	128	184	202	106	106	216	230	169	177	94	111	231	239	94	102	133	179
1241	RUN0004	La Réunion	Mascarenes	REU027	-21.0989	55.674283	2011-12-12	M. Techer, J. Clemencet	P0Q	A1	A1_MAD3	A	210	214	100	102	177	181	136	147	NA	NA	NA	NA	184	184	106	106	216	216	169	177	107	107	243	249	94	102	139	179
1242	RUN0005	La Réunion	Mascarenes	REU027	-21.0989	55.674283	2011-12-12	M. Techer, J. Clemencet	P0Q	A1	x	A	210	218	100	102	175	181	136	149	134	134	128	132	184	184	106	108	216	220	169	183	94	111	235	237	94	102	133	141
1243	RUN0006	La Réunion	Mascarenes	REU027	-21.0989	55.674283	2011-12-12	M. Techer, J. Clemencet	P0Q	A1	x	A	210	218	96	102	181	181	136	149	134	134	NA	NA	184	184	110	110	NA	NA	169	177	94	107	239	255	94	102	129	177
1244	RUN1917	La Réunion	Mascarenes	REU028	-21.14965	55.61858	2012-07-07	O. Esnault	P0Q	A1	A1_MAD3	A	210	218	96	102	177	181	147	149	132	133	128	128	184	184	106	106	222	230	169	169	111	111	239	243	102	102	131	141
1245	RUN1306	La Réunion	Mascarenes	REU029	-21.087683	55.71565	2012-02-01	T. François, M. Techer	P0Q	A1	x	A	210	214	100	102	181	181	147	149	133	134	128	132	174	184	106	106	230	236	165	177	107	107	233	239	94	102	139	141
1246	RUN1307	La Réunion	Mascarenes	REU029	-21.087683	55.71565	2012-02-01	T. François, M. Techer	P0Q	A1	x	A	210	210	102	102	181	181	136	147	132	133	160	162	184	184	106	110	218	230	169	181	94	107	237	239	100	100	177	179
1247	RUN1308	La Réunion	Mascarenes	REU029	-21.087683	55.71565	2012-02-01	T. François, M. Techer	P0Q	A1	x	A	210	212	96	102	177	181	136	149	132	132	128	140	184	184	106	110	216	232	169	177	111	111	233	233	94	102	141	177
1248	RUN1309	La Réunion	Mascarenes	REU029	-21.087683	55.71565	2012-02-01	T. François, M. Techer	P0Q	A1	x	A	210	210	100	102	175	181	149	149	133	133	128	162	184	184	106	106	232	232	NA	NA	107	111	NA	NA	NA	NA	NA	NA
1249	RUN1310	La Réunion	Mascarenes	REU029	-21.087683	55.71565	2012-02-01	T. François, M. Techer	P0Q	A1	A1_MAD3	A	210	214	100	102	181	181	147	149	132	132	128	128	184	202	106	110	230	230	169	177	94	111	NA	NA	102	102	139	139
1250	RUN1311	La Réunion	Mascarenes	REU029	-21.087683	55.71565	2012-02-01	T. François, M. Techer	P0Q	A1	x	A	210	212	100	102	181	181	136	149	132	134	128	128	184	184	110	112	220	230	169	177	94	107	233	233	94	102	141	183
1251	RUN1312	La Réunion	Mascarenes	REU029	-21.087683	55.71565	2012-02-01	T. François, M. Techer	P0Q	A1	x	A	214	226	96	100	177	181	136	136	128	134	140	146	184	184	110	110	216	216	169	177	107	111	233	237	94	102	177	181
1252	RUN1313	La Réunion	Mascarenes	REU029	-21.087683	55.71565	2012-02-01	T. François, M. Techer	P0Q	A1	x	A	214	226	100	102	177	181	149	149	132	134	128	152	184	184	106	110	216	224	169	177	107	111	233	239	94	100	141	141
1253	RUN1314	La Réunion	Mascarenes	REU029	-21.087683	55.71565	2012-02-01	T. François, M. Techer	P0Q	A1	x	A	210	214	102	102	175	181	136	147	134	134	128	128	184	228	106	110	220	234	169	179	94	107	237	239	100	100	141	175
1254	RUN1315	La Réunion	Mascarenes	REU029	-21.087683	55.71565	2012-02-01	T. François, M. Techer	P0Q	A1	x	A	210	210	100	102	181	181	149	149	128	133	152	152	174	234	110	110	218	232	169	169	107	107	235	239	94	102	139	141
1255	RUN1316	La Réunion	Mascarenes	REU029	-21.087683	55.71565	2012-02-01	T. François, M. Techer	P0Q	A1	x	A	212	214	100	102	181	181	149	149	128	128	128	162	184	184	106	110	230	232	NA	NA	NA	NA	NA	NA	NA	NA	NA	NA
1256	RUN1317	La Réunion	Mascarenes	REU029	-21.087683	55.71565	2012-02-01	T. François, M. Techer	P0Q	A1	x	A	214	218	102	102	177	181	149	149	128	134	128	133	184	184	106	110	230	230	169	169	94	111	235	241	94	104	177	181
1257	RUN1318	La Réunion	Mascarenes	REU029	-21.087683	55.71565	2012-02-01	T. François, M. Techer	P0Q	A1	A1_MAD3	A	210	210	102	102	181	181	136	149	133	133	128	146	184	184	106	106	218	230	NA	NA	NA	NA	NA	NA	NA	NA	NA	NA
1258	RUN1319	La Réunion	Mascarenes	REU029	-21.087683	55.71565	2012-02-01	T. François, M. Techer	P0Q	A1	x	A	210	214	96	96	181	183	136	149	132	133	128	128	184	184	106	106	230	232	NA	NA	NA	NA	NA	NA	NA	NA	NA	NA
1259	RUN1320	La Réunion	Mascarenes	REU029	-21.087683	55.71565	2012-02-01	T. François, M. Techer	P0Q	A1	x	A	218	226	92	102	177	181	147	149	133	133	128	133	184	208	106	106	230	230	NA	NA	NA	NA	NA	NA	NA	NA	NA	NA
1260	RUN1321	La Réunion	Mascarenes	REU029	-21.087683	55.71565	2012-02-01	T. François, M. Techer	P0Q	A1	x	A	210	214	96	102	181	181	136	149	133	134	128	128	184	184	106	110	NA	NA	169	179	111	111	235	235	102	104	141	141
1261	RUN1322	La Réunion	Mascarenes	REU029	-21.087683	55.71565	2012-02-01	T. François, M. Techer	P0Q	A1	x	A	210	214	102	102	175	177	136	149	132	134	128	128	184	202	106	106	220	230	NA	NA	NA	NA	NA	NA	NA	NA	NA	NA
1262	RUN1323	La Réunion	Mascarenes	REU029	-21.087683	55.71565	2012-02-01	T. François, M. Techer	P0Q	A1	x	A	210	210	102	102	175	181	147	147	132	134	128	146	184	232	106	110	216	218	165	169	111	111	237	239	102	102	177	179
1263	RUN1324	La Réunion	Mascarenes	REU029	-21.087683	55.71565	2012-02-01	T. François, M. Techer	P0Q	A1	x	A	210	214	100	102	175	177	147	149	134	134	128	128	184	184	106	110	216	236	169	169	NA	NA	NA	NA	NA	NA	NA	NA
1264	RUN1325	La Réunion	Mascarenes	REU029	-21.087683	55.71565	2012-02-01	T. François, M. Techer	P0Q	A1	x	A	210	210	96	96	177	191	147	149	134	134	128	128	184	234	110	110	216	230	169	179	107	110	233	239	94	94	129	183
1265	RUN1326	La Réunion	Mascarenes	REU029	-21.087683	55.71565	2012-02-01	T. François, M. Techer	P0Q	A1	A1_MAD3	A	214	226	96	100	177	177	136	147	128	134	128	128	184	184	106	110	228	230	169	169	111	112	233	237	94	102	133	175
1266	RUN1328	La Réunion	Mascarenes	REU029	-21.087683	55.71565	2012-02-01	T. François, M. Techer	P0Q	A1	x	A	210	210	96	102	181	181	147	149	133	134	128	128	184	184	106	110	222	230	169	179	112	116	233	237	94	102	139	183
1267	RUN1329	La Réunion	Mascarenes	REU029	-21.087683	55.71565	2012-02-01	T. François, M. Techer	P0Q	A1	x	A	210	210	92	100	181	181	149	149	128	128	128	128	184	234	106	110	232	232	169	181	94	107	233	237	94	94	129	177
1268	RUN1330	La Réunion	Mascarenes	REU029	-21.087683	55.71565	2012-02-01	T. François, M. Techer	P0Q	A1	x	A	210	226	100	102	175	181	136	149	128	128	128	145	184	184	106	110	216	230	177	179	107	111	NA	NA	NA	NA	NA	NA
1269	RUN1334	La Réunion	Mascarenes	REU029	-21.087683	55.71565	2012-02-01	T. François, M. Techer	P0Q	A1	x	A	210	218	96	100	179	181	147	149	133	134	128	128	184	184	106	110	218	230	169	177	94	107	233	243	94	102	139	179
1270	RUN1327	La Réunion	Mascarenes	REU029	-21.087683	55.71565	2012-02-01	T. François, M. Techer	Not succesful	Not succesful	x	NA	212	226	100	102	181	181	149	149	132	134	128	128	184	190	106	106	220	232	169	169	107	111	237	239	94	102	141	181
1271	RUN1331	La Réunion	Mascarenes	REU029	-21.087683	55.71565	2012-02-01	T. François, M. Techer	Not succesful	Not succesful	x	NA	210	212	100	102	181	181	136	149	128	134	128	158	184	184	106	110	230	234	175	181	94	111	235	239	94	94	141	183
1272	RUN1332	La Réunion	Mascarenes	REU029	-21.087683	55.71565	2012-02-01	T. François, M. Techer	Not succesful	Not succesful	x	NA	210	214	96	100	175	181	136	147	133	134	128	128	184	232	106	106	222	222	169	169	110	111	235	237	94	94	129	141
1273	RUN1333	La Réunion	Mascarenes	REU029	-21.087683	55.71565	2012-02-01	T. François, M. Techer	Not succesful	Not succesful	x	NA	210	212	96	100	175	177	136	136	133	133	128	140	184	232	106	106	218	232	179	181	111	111	233	235	100	104	141	147
1274	RUN0016	La Réunion	Mascarenes	REU030	-21.117433	55.7151	2011-12-12	M. Techer, J. Clemencet	P0Q	A1	x	A	210	210	100	100	177	181	140	149	133	134	128	148	184	184	106	110	216	230	169	183	94	111	233	239	94	102	139	141
1275	RUN0017	La Réunion	Mascarenes	REU030	-21.117433	55.7151	2011-12-12	M. Techer, J. Clemencet	P0Q	A1	x	A	210	216	100	102	175	181	147	149	133	134	128	128	174	184	106	110	216	216	169	177	94	94	233	233	94	102	139	179
1276	RUN0018	La Réunion	Mascarenes	REU030	-21.117433	55.7151	2011-12-12	M. Techer, J. Clemencet	P0Q	A1	x	A	210	212	96	102	181	181	NA	NA	133	134	128	128	184	184	106	110	230	230	169	177	94	94	NA	NA	102	102	141	141
1277	RUN0019	La Réunion	Mascarenes	REU030	-21.117433	55.7151	2011-12-12	M. Techer, J. Clemencet	P0Q	A1	x	A	210	218	96	102	177	179	147	149	133	133	128	131	184	184	106	106	230	232	165	169	94	111	235	237	102	102	139	181
1278	RUN0020	La Réunion	Mascarenes	REU030	-21.117433	55.7151	2011-12-12	M. Techer, J. Clemencet	P0Q	A1	A1_MAD3	A	210	210	96	96	175	181	136	149	132	134	128	156	184	184	106	110	220	222	169	177	94	111	233	249	94	102	139	181
1279	RUN0021	La Réunion	Mascarenes	REU030	-21.117433	55.7151	2011-12-12	M. Techer, J. Clemencet	P0Q	A1	x	A	210	226	100	100	181	191	149	149	134	134	128	131	184	184	106	110	232	232	169	175	107	111	235	235	94	94	139	179
1280	RUN0022	La Réunion	Mascarenes	REU030	-21.117433	55.7151	2011-12-12	M. Techer, J. Clemencet	P0Q	A1	x	A	210	214	102	102	179	181	136	149	133	134	128	148	184	184	106	110	218	232	169	177	94	94	227	235	100	102	139	181
1281	RUN0023	La Réunion	Mascarenes	REU030	-21.117433	55.7151	2011-12-12	M. Techer, J. Clemencet	P0Q	A1	x	A	214	218	96	100	181	181	136	147	132	134	128	128	184	202	106	110	230	232	169	169	107	111	237	239	102	102	129	179
1282	RUN0024	La Réunion	Mascarenes	REU030	-21.117433	55.7151	2011-12-12	M. Techer, J. Clemencet	P0Q	A1	x	A	210	214	100	102	179	181	136	136	133	134	131	154	184	238	106	106	216	230	169	181	111	111	233	239	94	102	141	179
1283	RUN0025	La Réunion	Mascarenes	REU030	-21.117433	55.7151	2011-12-12	M. Techer, J. Clemencet	P0Q	A1	x	A	210	210	100	102	175	177	136	149	133	134	128	128	NA	NA	106	106	NA	NA	169	177	94	111	225	233	102	104	129	141
1284	RUN0026	La Réunion	Mascarenes	REU030	-21.117433	55.7151	2011-12-12	M. Techer, J. Clemencet	P0Q	A1	x	A	210	212	96	102	181	181	147	149	132	134	NA	NA	NA	NA	106	110	NA	NA	169	179	107	111	NA	NA	94	102	141	141
1285	RUN0027	La Réunion	Mascarenes	REU030	-21.117433	55.7151	2011-12-12	M. Techer, J. Clemencet	P0Q	A1	x	A	210	210	102	102	181	181	136	149	133	134	NA	NA	184	184	110	110	NA	NA	165	169	94	94	231	231	100	104	143	179
1286	RUN0028	La Réunion	Mascarenes	REU030	-21.117433	55.7151	2011-12-12	M. Techer, J. Clemencet	P0Q	A1	x	A	210	218	100	102	181	181	136	147	133	134	128	128	NA	NA	106	110	NA	NA	169	181	107	113	233	237	102	102	139	139
1287	RUN0029	La Réunion	Mascarenes	REU030	-21.117433	55.7151	2011-12-12	M. Techer, J. Clemencet	P0Q	A1	A1_MAD3	A	210	216	96	100	177	179	136	136	133	133	NA	NA	184	184	106	110	218	220	169	179	94	111	233	233	94	94	133	141
1288	RUN0030	La Réunion	Mascarenes	REU030	-21.117433	55.7151	2011-12-12	M. Techer, J. Clemencet	P0Q	A1	x	A	210	210	102	102	179	181	136	149	133	134	128	131	184	184	106	110	216	230	169	169	111	111	239	241	94	102	129	139
1289	RUN0031	La Réunion	Mascarenes	REU030	-21.117433	55.7151	2011-12-12	M. Techer, J. Clemencet	P0Q	A1	x	A	210	210	100	102	181	181	136	147	128	134	128	154	184	184	106	106	218	222	169	175	111	111	235	237	94	102	139	139
1290	RUN0032	La Réunion	Mascarenes	REU030	-21.117433	55.7151	2011-12-12	M. Techer, J. Clemencet	P0Q	A1	x	A	210	216	102	102	177	181	136	147	133	133	128	154	184	184	106	110	216	220	169	169	107	111	233	233	102	104	139	179
1291	RUN0033	La Réunion	Mascarenes	REU030	-21.117433	55.7151	2011-12-12	M. Techer, J. Clemencet	P0Q	A1	x	A	210	218	100	102	181	181	149	149	133	133	128	128	198	202	106	110	222	230	169	177	107	111	239	239	102	112	141	181
1292	RUN0034	La Réunion	Mascarenes	REU030	-21.117433	55.7151	2011-12-12	M. Techer, J. Clemencet	P0Q	A1	x	A	214	218	100	102	179	181	136	149	132	134	128	128	184	184	106	110	220	230	175	177	92	111	233	243	102	102	139	141
1293	RUN0035	La Réunion	Mascarenes	REU030	-21.117433	55.7151	2011-12-12	M. Techer, J. Clemencet	P0Q	A1	x	A	212	214	96	102	177	181	136	149	132	134	128	128	NA	NA	106	110	216	220	169	169	111	116	225	233	94	94	141	141
1294	RUN0112	La Réunion	Mascarenes	REU031	-21.112314	55.726501	2011-11-03	Beekeeper	P0Q	A1	x	A	212	214	100	102	181	181	140	149	134	134	128	146	184	232	110	110	222	222	169	175	92	94	243	243	102	102	141	191
1295	RUN0113	La Réunion	Mascarenes	REU031	-21.112314	55.726501	2011-11-03	Beekeeper	P0Q	A1	x	A	218	218	102	102	181	181	136	149	134	134	144	162	184	184	106	106	224	230	169	181	107	117	239	249	102	104	141	183
1296	RUN0114	La Réunion	Mascarenes	REU031	-21.112314	55.726501	2011-11-03	Beekeeper	P0Q	A1	x	A	210	214	100	100	177	177	136	149	128	134	126	128	184	184	110	110	222	224	169	175	92	107	233	239	102	102	139	143
1297	RUN0115	La Réunion	Mascarenes	REU031	-21.112314	55.726501	2011-11-03	Beekeeper	P0Q	A1	x	A	210	214	96	102	181	181	147	149	132	133	128	147	184	184	106	110	222	230	169	177	92	107	233	237	102	102	129	181
1298	RUN0116	La Réunion	Mascarenes	REU031	-21.112314	55.726501	2011-11-03	Beekeeper	P0Q	A1	x	A	210	214	96	96	175	181	147	149	133	133	148	148	220	232	106	106	230	234	169	169	94	107	233	243	94	94	129	133
1299	RUN0117	La Réunion	Mascarenes	REU031	-21.112314	55.726501	2011-11-03	Beekeeper	P0Q	A1	x	A	214	214	96	102	177	181	147	149	132	134	128	158	184	184	106	110	216	232	169	177	92	99	233	235	102	102	179	183
1300	RUN0118	La Réunion	Mascarenes	REU031	-21.112314	55.726501	2011-11-03	Beekeeper	P0Q	A1	x	A	210	210	92	100	181	209	136	149	133	134	128	156	184	234	106	110	220	230	165	165	94	113	237	247	102	104	177	181
1301	RUN0119	La Réunion	Mascarenes	REU031	-21.112314	55.726501	2011-11-03	Beekeeper	P0Q	A1	x	A	210	226	100	102	177	181	136	147	134	134	128	140	184	184	110	110	222	230	169	181	107	111	237	239	94	102	179	181
1302	RUN0120	La Réunion	Mascarenes	REU031	-21.112314	55.726501	2011-11-03	Beekeeper	P0Q	A1	A1_MAD3	A	210	218	92	100	175	177	136	149	133	134	128	160	184	184	106	110	216	232	165	169	107	111	235	243	94	94	141	181
1303	RUN0121	La Réunion	Mascarenes	REU031	-21.112314	55.726501	2011-11-03	Beekeeper	P0Q	A1	x	A	210	214	102	102	181	183	149	149	128	134	128	146	184	184	106	110	230	230	169	169	107	111	233	241	102	102	177	177
1304	RUN0122	La Réunion	Mascarenes	REU031	-21.112314	55.726501	2011-11-03	Beekeeper	P0Q	A1	x	A	210	214	102	102	181	183	149	149	133	134	128	140	184	184	106	110	228	230	169	175	107	111	233	235	102	102	131	177
1305	RUN0123	La Réunion	Mascarenes	REU031	-21.112314	55.726501	2011-11-03	Beekeeper	P0Q	A1	x	A	210	214	96	102	177	181	149	149	132	132	128	148	184	220	106	110	222	228	169	177	92	111	243	247	94	102	139	139
1306	RUN0124	La Réunion	Mascarenes	REU031	-21.112314	55.726501	2011-11-03	Beekeeper	P0Q	A1	x	A	210	216	102	102	177	181	149	149	133	134	128	154	184	184	110	110	216	218	165	169	92	111	233	235	94	104	139	141
1307	RUN0125	La Réunion	Mascarenes	REU031	-21.112314	55.726501	2011-11-03	Beekeeper	P0Q	A1	x	A	210	212	96	102	181	181	147	149	128	132	128	132	184	220	106	110	230	230	169	169	94	111	227	233	94	102	149	181
1308	RUN0126	La Réunion	Mascarenes	REU031	-21.112314	55.726501	2011-11-03	Beekeeper	P0Q	A1	x	A	218	218	92	102	177	181	149	149	134	134	128	146	184	184	110	110	216	224	169	169	107	111	235	237	94	102	139	179
1309	RUN0127	La Réunion	Mascarenes	REU031	-21.112314	55.726501	2011-11-03	Beekeeper	P0Q	A1	x	A	214	228	92	96	177	181	140	147	132	134	128	144	184	232	110	110	216	220	169	177	94	94	231	237	100	104	129	181
1310	RUN0128	La Réunion	Mascarenes	REU031	-21.112314	55.726501	2011-11-03	Beekeeper	P0Q	A1	x	A	210	214	92	100	175	181	149	149	134	134	126	147	184	234	106	110	218	230	177	183	92	111	243	243	102	102	179	179
1311	RUN0129	La Réunion	Mascarenes	REU031	-21.112314	55.726501	2011-11-03	Beekeeper	P0Q	A1	x	A	214	214	96	96	177	177	136	149	134	134	128	128	184	184	110	110	216	224	169	175	92	111	233	243	94	102	143	181
1312	RUN0130	La Réunion	Mascarenes	REU031	-21.112314	55.726501	2011-11-03	Beekeeper	P0Q	A1	x	A	214	218	92	102	175	175	136	149	132	133	128	145	184	202	106	106	230	230	165	169	107	111	235	243	94	94	171	185
1313	RUN0131	La Réunion	Mascarenes	REU031	-21.112314	55.726501	2011-11-03	Beekeeper	P0Q	A1	x	A	210	228	96	102	179	181	140	147	133	134	128	144	184	184	106	110	218	218	169	177	94	111	231	249	102	104	133	139
1314	RUN0971	La Réunion	Mascarenes	REU032	-21.12015	55.753633	2012-01-25	T. François	P0Q	A1	x	A	212	214	96	96	177	181	136	149	133	134	128	162	184	186	106	110	216	222	169	181	111	111	233	233	94	94	139	179
1315	RUN0972	La Réunion	Mascarenes	REU032	-21.12015	55.753633	2012-01-25	T. François	P0Q	A1	x	A	210	222	96	102	177	181	147	147	133	134	128	154	184	184	106	110	230	232	175	177	95	111	233	235	102	102	139	179
1316	RUN0973	La Réunion	Mascarenes	REU032	-21.12015	55.753633	2012-01-25	T. François	P0Q	A1	x	A	210	218	96	102	181	181	149	149	133	134	NA	NA	NA	NA	NA	NA	NA	NA	165	169	111	111	239	241	100	100	129	129
1317	RUN0974	La Réunion	Mascarenes	REU032	-21.12015	55.753633	2012-01-25	T. François	P0Q	A1	x	A	214	218	92	100	181	181	136	149	134	134	128	154	184	184	106	110	216	222	179	181	107	111	229	239	102	104	141	141
1318	RUN0975	La Réunion	Mascarenes	REU032	-21.12015	55.753633	2012-01-25	T. François	P0Q	A1	x	A	210	210	96	102	177	181	149	149	133	134	128	128	206	206	106	106	222	230	169	177	111	111	237	239	94	104	129	139
1319	RUN0976	La Réunion	Mascarenes	REU032	-21.12015	55.753633	2012-01-25	T. François	P0Q	A1	x	A	218	218	92	102	181	181	136	147	134	134	128	128	184	184	110	110	216	216	169	175	107	111	235	235	94	102	129	129
1320	RUN0977	La Réunion	Mascarenes	REU032	-21.12015	55.753633	2012-01-25	T. François	P0Q	A1	x	A	210	212	100	102	175	181	136	149	134	134	128	154	184	184	106	110	216	222	177	177	94	111	233	235	94	102	141	181
1321	RUN0978	La Réunion	Mascarenes	REU032	-21.12015	55.753633	2012-01-25	T. François	P0Q	A1	x	A	210	210	102	102	181	181	136	147	133	134	128	131	184	184	106	110	216	222	NA	NA	107	111	NA	NA	94	102	129	129
1322	RUN0979	La Réunion	Mascarenes	REU032	-21.12015	55.753633	2012-01-25	T. François	P0Q	A1	x	A	210	210	100	102	181	181	136	136	134	134	128	128	184	184	110	110	230	232	169	177	94	107	233	235	102	102	129	141
1323	RUN0980	La Réunion	Mascarenes	REU032	-21.12015	55.753633	2012-01-25	T. François	P0Q	A1	x	A	214	214	102	102	181	181	136	149	132	133	128	128	184	232	110	110	216	230	169	169	107	111	235	237	94	102	133	141
1324	RUN0981	La Réunion	Mascarenes	REU032	-21.12015	55.753633	2012-01-25	T. François	P0Q	A1	x	A	210	210	102	102	175	181	147	149	134	134	128	132	186	220	106	110	218	220	169	177	111	116	233	233	102	104	131	177
1325	RUN0982	La Réunion	Mascarenes	REU032	-21.12015	55.753633	2012-01-25	T. François	P0Q	A1	x	A	212	214	96	96	175	181	136	147	134	134	128	154	234	234	106	106	212	216	169	169	107	111	233	233	102	102	141	181
1326	RUN0983	La Réunion	Mascarenes	REU032	-21.12015	55.753633	2012-01-25	T. François	P0Q	A1	x	A	210	214	92	100	175	177	136	149	133	134	128	164	184	234	106	106	216	234	169	177	92	111	233	249	102	104	129	171
1327	RUN0984	La Réunion	Mascarenes	REU032	-21.12015	55.753633	2012-01-25	T. François	P0Q	A1	x	A	210	210	96	102	181	181	136	149	133	133	128	164	184	230	106	110	230	232	165	169	94	111	NA	NA	94	104	141	141
1328	RUN0985	La Réunion	Mascarenes	REU032	-21.12015	55.753633	2012-01-25	T. François	P0Q	A1	A1_MAD3	A	210	212	96	102	181	181	149	149	134	134	131	131	184	184	106	110	222	230	169	169	94	111	249	249	94	104	139	141
1329	RUN0986	La Réunion	Mascarenes	REU032	-21.12015	55.753633	2012-01-25	T. François	P0Q	A1	x	A	210	218	100	102	175	179	147	149	134	134	154	162	184	184	106	110	216	228	165	169	110	111	239	239	94	102	133	141
1330	RUN0987	La Réunion	Mascarenes	REU032	-21.12015	55.753633	2012-01-25	T. François	P0Q	A1	x	A	214	214	96	102	177	181	147	149	132	134	146	158	184	184	106	106	216	230	169	183	94	111	NA	NA	94	102	139	177
1331	RUN0988	La Réunion	Mascarenes	REU032	-21.12015	55.753633	2012-01-25	T. François	P0Q	A1	x	A	210	218	100	102	181	181	149	149	128	133	128	128	184	232	106	110	222	232	165	179	94	111	241	241	94	104	141	181
1332	RUN0989	La Réunion	Mascarenes	REU032	-21.12015	55.753633	2012-01-25	T. François	P0Q	A1	x	A	210	218	102	102	177	181	136	149	132	133	128	140	184	232	106	106	216	220	177	181	111	113	225	239	94	94	129	179
1333	RUN0990	La Réunion	Mascarenes	REU032	-21.12015	55.753633	2012-01-25	T. François	P0Q	A1	x	A	210	212	96	100	177	181	147	149	133	134	128	128	184	184	106	110	230	230	169	177	99	107	233	237	94	102	133	179
1334	RUN0991	La Réunion	Mascarenes	REU032	-21.12015	55.753633	2012-01-25	T. François	P0Q	A1	x	A	210	214	102	102	181	181	147	149	134	134	140	156	184	184	106	106	230	232	169	169	111	111	233	233	94	102	141	177
1335	RUN0992	La Réunion	Mascarenes	REU032	-21.12015	55.753633	2012-01-25	T. François	P0Q	A1	x	A	210	218	100	102	177	179	149	149	132	134	128	144	184	234	106	110	216	222	169	175	107	111	225	233	94	94	141	177
1336	RUN0993	La Réunion	Mascarenes	REU032	-21.12015	55.753633	2012-01-25	T. François	P0Q	A1	x	A	210	214	100	102	181	181	147	147	133	134	142	148	184	232	106	106	224	232	169	175	107	111	239	239	94	102	139	139
1337	RUN0994	La Réunion	Mascarenes	REU032	-21.12015	55.753633	2012-01-25	T. François	P0Q	A1	x	A	210	212	96	102	181	181	147	147	133	134	128	162	184	232	106	110	216	232	169	169	94	111	235	243	94	102	139	141
1338	RUN0995	La Réunion	Mascarenes	REU032	-21.12015	55.753633	2012-01-25	T. François	P0Q	A1	x	A	212	214	102	102	175	181	136	149	134	134	142	147	184	184	110	110	218	230	169	169	94	107	235	237	94	102	133	141
1339	RUN0996	La Réunion	Mascarenes	REU032	-21.12015	55.753633	2012-01-25	T. François	P0Q	A1	x	A	210	214	102	102	175	177	149	149	134	134	126	126	174	184	106	106	220	230	169	179	111	111	233	239	94	102	129	179
1340	RUN0997	La Réunion	Mascarenes	REU032	-21.12015	55.753633	2012-01-25	T. François	P0Q	A1	x	A	210	210	102	102	181	181	136	149	134	134	128	162	184	200	106	112	216	234	169	169	94	111	233	237	94	102	139	141
1341	RUN0998	La Réunion	Mascarenes	REU032	-21.12015	55.753633	2012-01-25	T. François	P0Q	A1	A1_MAD3	A	210	214	92	102	181	181	136	149	132	134	128	128	184	184	106	110	220	230	165	177	111	113	NA	NA	94	102	NA	NA
1342	RUN0999	La Réunion	Mascarenes	REU032	-21.12015	55.753633	2012-01-25	T. François	P0Q	A1	x	A	210	224	102	102	181	181	136	147	133	134	128	158	184	202	106	106	216	230	169	181	94	111	239	239	102	102	129	141
1343	RUN1000	La Réunion	Mascarenes	REU032	-21.12015	55.753633	2012-01-25	T. François	P0Q	A1	x	A	210	212	96	100	181	181	149	149	133	134	128	128	184	184	110	112	228	234	175	181	111	116	235	239	94	102	133	139
1344	RUN1001	La Réunion	Mascarenes	REU032	-21.12015	55.753633	2012-01-25	T. François	P0Q	A1	A1_MAD3	A	210	210	100	102	181	207	140	149	133	134	128	128	184	212	106	110	222	236	169	169	111	111	233	241	94	102	141	181
1345	RUN1003	La Réunion	Mascarenes	REU032	-21.12015	55.753633	2012-01-25	T. François	P0Q	A1	x	A	210	214	92	100	181	191	140	149	133	134	128	154	202	206	106	110	220	230	165	169	111	111	239	241	94	104	141	177
1346	RUN1004	La Réunion	Mascarenes	REU032	-21.12015	55.753633	2012-01-25	T. François	P0Q	A1	x	A	210	218	102	102	181	181	136	136	132	133	128	156	184	184	106	110	230	232	169	179	94	111	237	241	102	102	141	181
1347	RUN1005	La Réunion	Mascarenes	REU032	-21.12015	55.753633	2012-01-25	T. François	P0Q	A1	x	A	210	222	100	102	177	183	149	149	128	133	152	158	184	212	110	110	220	220	169	169	107	111	233	243	94	102	141	177
1348	RUN1006	La Réunion	Mascarenes	REU032	-21.12015	55.753633	2012-01-25	T. François	P0Q	A1	x	A	210	214	96	100	175	181	149	149	132	134	128	156	184	232	106	110	220	230	165	169	107	117	225	233	102	102	177	183
1349	RUN1007	La Réunion	Mascarenes	REU032	-21.12015	55.753633	2012-01-25	T. François	P0Q	A1	x	A	210	210	102	102	179	181	149	151	133	133	126	164	184	232	106	106	216	232	169	181	111	111	233	237	102	102	147	181
1350	RUN1008	La Réunion	Mascarenes	REU032	-21.12015	55.753633	2012-01-25	T. François	P0Q	A1	x	A	210	210	96	102	181	183	149	149	132	134	128	128	184	184	106	110	230	230	169	169	94	94	233	243	102	102	177	181
1351	RUN1009	La Réunion	Mascarenes	REU032	-21.12015	55.753633	2012-01-25	T. François	P0Q	A1	x	A	210	214	102	102	181	191	149	149	133	134	140	142	184	184	110	110	216	230	175	177	107	116	233	233	94	94	133	179
1352	RUN1010	La Réunion	Mascarenes	REU032	-21.12015	55.753633	2012-01-25	T. François	P0Q	A1	x	A	210	210	100	102	177	181	149	149	133	134	128	142	184	184	106	110	216	230	177	177	111	111	233	241	102	102	141	177
1353	RUN1011	La Réunion	Mascarenes	REU032	-21.12015	55.753633	2012-01-25	T. François	P0Q	A1	x	A	210	214	96	100	177	179	147	149	133	134	128	152	184	184	106	110	218	232	165	169	111	111	233	239	94	102	129	139
1354	RUN1012	La Réunion	Mascarenes	REU032	-21.12015	55.753633	2012-01-25	T. François	P0Q	A1	x	A	210	214	100	102	181	181	147	149	133	133	128	128	184	184	110	110	216	230	169	169	94	107	239	243	94	102	179	181
1355	RUN1013	La Réunion	Mascarenes	REU032	-21.12015	55.753633	2012-01-25	T. François	P0Q	A1	x	A	210	214	96	102	177	183	147	149	133	134	128	152	184	232	106	110	218	232	165	177	107	111	233	239	94	102	129	139
1356	RUN1014	La Réunion	Mascarenes	REU032	-21.12015	55.753633	2012-01-25	T. François	P0Q	A1	x	A	210	210	96	102	181	181	149	149	133	134	128	156	184	184	106	110	222	230	177	181	94	107	233	241	94	94	129	177
1357	RUN1015	La Réunion	Mascarenes	REU032	-21.12015	55.753633	2012-01-25	T. François	P0Q	A1	x	A	210	210	100	102	181	181	140	149	132	134	128	160	184	220	106	110	222	224	169	179	94	94	237	243	94	102	141	177
1358	RUN1016	La Réunion	Mascarenes	REU032	-21.12015	55.753633	2012-01-25	T. François	P0Q	A1	x	A	210	210	96	102	177	181	136	149	133	134	142	162	184	184	106	110	222	230	169	177	94	94	229	237	102	102	129	129
1359	RUN1017	La Réunion	Mascarenes	REU032	-21.12015	55.753633	2012-01-25	T. François	P0Q	A1	x	A	210	212	96	102	177	181	136	149	133	134	128	128	174	184	106	106	NA	NA	169	181	111	111	NA	NA	94	102	139	139
1360	RUN1018	La Réunion	Mascarenes	REU032	-21.12015	55.753633	2012-01-25	T. François	P0Q	A1	x	A	210	212	96	102	181	209	140	147	133	134	128	156	184	184	106	110	216	216	169	181	111	111	247	249	94	102	141	141
1361	RUN1019	La Réunion	Mascarenes	REU032	-21.12015	55.753633	2012-01-25	T. François	P0Q	A1	x	A	210	210	96	102	175	177	149	149	132	134	140	166	184	184	106	110	230	232	169	169	107	111	231	239	94	102	181	185
1362	RUN1020	La Réunion	Mascarenes	REU032	-21.12015	55.753633	2012-01-25	T. François	P0Q	A1	x	A	210	212	96	102	181	181	136	140	134	134	128	160	184	184	110	110	220	224	165	179	94	111	241	243	94	102	141	177
1363	RUN1021	La Réunion	Mascarenes	REU032	-21.12015	55.753633	2012-01-25	T. François	P0Q	A1	x	A	210	218	96	100	175	181	136	147	132	134	131	158	184	234	110	110	216	220	169	177	107	107	225	233	102	102	179	181
1364	RUN1022	La Réunion	Mascarenes	REU032	-21.12015	55.753633	2012-01-25	T. François	P0Q	A1	x	A	210	228	96	102	177	181	140	149	134	134	128	128	234	234	106	110	216	232	169	169	107	111	243	243	94	102	133	139
1365	RUN1023	La Réunion	Mascarenes	REU032	-21.12015	55.753633	2012-01-25	T. François	P0Q	A1	x	A	210	214	102	102	177	177	140	149	134	134	128	156	184	184	110	110	216	230	169	177	107	111	225	235	94	94	133	141
1366	RUN1024	La Réunion	Mascarenes	REU032	-21.12015	55.753633	2012-01-25	T. François	P0Q	A1	x	A	210	210	92	102	181	181	136	147	133	133	128	128	184	234	106	110	216	220	169	177	107	116	233	241	94	102	141	181
1367	RUN1025	La Réunion	Mascarenes	REU032	-21.12015	55.753633	2012-01-25	T. François	P0Q	A1	x	A	210	214	102	102	181	181	136	147	134	134	128	166	184	232	106	110	222	230	169	169	107	111	227	239	94	102	177	179
1368	RUN1026	La Réunion	Mascarenes	REU032	-21.12015	55.753633	2012-01-25	T. François	P0Q	A1	x	A	214	218	92	102	181	181	149	149	133	134	154	156	184	184	106	110	220	232	179	181	94	94	233	237	94	94	141	179
1369	RUN1027	La Réunion	Mascarenes	REU032	-21.12015	55.753633	2012-01-25	T. François	P0Q	A1	x	A	210	226	92	102	181	181	140	149	134	134	NA	NA	184	184	110	110	NA	NA	175	177	92	94	225	233	84	94	NA	NA
1370	RUN1028	La Réunion	Mascarenes	REU032	-21.12015	55.753633	2012-01-25	T. François	P0Q	A1	x	A	210	214	100	102	177	181	149	149	133	134	128	146	184	184	106	110	232	232	169	179	94	94	235	249	94	94	141	141
1371	RUN1029	La Réunion	Mascarenes	REU032	-21.12015	55.753633	2012-01-25	T. François	P0Q	A1	x	A	210	218	96	100	181	181	136	136	133	134	156	160	184	184	106	110	214	230	169	169	107	111	233	241	94	102	141	141
1372	RUN1030	La Réunion	Mascarenes	REU032	-21.12015	55.753633	2012-01-25	T. François	P0Q	A1	x	A	210	220	100	102	177	181	149	149	134	134	128	146	184	206	106	110	222	222	169	183	111	116	233	239	94	94	129	141
1373	RUN1031	La Réunion	Mascarenes	REU032	-21.12015	55.753633	2012-01-25	T. François	P0Q	A1	x	A	210	214	102	102	175	181	149	149	133	134	128	128	184	232	106	110	230	232	169	169	94	107	233	239	94	94	139	177
1374	RUN1032	La Réunion	Mascarenes	REU032	-21.12015	55.753633	2012-01-25	T. François	P0Q	A1	x	A	210	218	102	102	177	181	149	149	133	133	128	156	184	232	106	110	218	218	177	181	94	111	225	233	94	102	139	177
1375	RUN1033	La Réunion	Mascarenes	REU032	-21.12015	55.753633	2012-01-25	T. François	P0Q	A1	x	A	210	214	102	102	175	177	136	149	133	134	128	158	184	184	110	110	216	230	177	181	94	107	235	239	94	102	133	139
1376	RUN1034	La Réunion	Mascarenes	REU032	-21.12015	55.753633	2012-01-25	T. François	P0Q	A1	x	A	218	218	100	102	175	181	136	147	134	134	128	128	184	238	106	106	218	230	169	181	110	111	239	243	94	94	139	141
1377	RUN1035	La Réunion	Mascarenes	REU032	-21.12015	55.753633	2012-01-25	T. François	P0Q	A1	x	A	210	218	102	102	179	181	136	136	134	134	148	148	184	184	106	110	220	230	169	179	111	111	239	243	102	104	139	183
1378	RUN1036	La Réunion	Mascarenes	REU032	-21.12015	55.753633	2012-01-25	T. François	P0Q	A1	x	A	210	214	92	102	177	181	147	149	132	134	128	158	184	202	106	106	216	220	175	179	94	111	233	249	102	104	133	141
1379	RUN1037	La Réunion	Mascarenes	REU032	-21.12015	55.753633	2012-01-25	T. François	P0Q	A1	x	A	210	214	102	102	181	191	147	149	132	134	128	145	184	232	106	106	216	232	169	169	94	111	233	239	94	94	131	141
1380	RUN1038	La Réunion	Mascarenes	REU032	-21.12015	55.753633	2012-01-25	T. François	P0Q	A1	x	A	210	214	92	96	181	181	136	147	134	134	128	128	184	236	106	106	218	222	169	169	94	111	233	239	102	102	131	181
1381	RUN1039	La Réunion	Mascarenes	REU032	-21.12015	55.753633	2012-01-25	T. François	P0Q	A1	x	A	210	218	96	102	181	181	147	149	134	134	128	133	174	184	106	110	220	230	165	181	107	111	225	225	94	102	NA	NA
1382	RUN1040	La Réunion	Mascarenes	REU032	-21.12015	55.753633	2012-01-25	T. François	P0Q	A1	x	A	210	212	100	102	181	181	136	149	128	132	128	154	184	184	110	110	230	230	169	175	107	107	233	235	94	104	141	177
1383	RUN1042	La Réunion	Mascarenes	REU032	-21.12015	55.753633	2012-01-25	T. François	P0Q	A1	x	A	210	214	96	102	177	181	147	149	132	132	128	128	184	232	106	106	230	232	165	169	94	111	233	233	94	94	141	181
1384	RUN1043	La Réunion	Mascarenes	REU032	-21.12015	55.753633	2012-01-25	T. François	P0Q	A1	x	A	210	214	102	102	177	181	140	147	134	134	128	158	184	184	106	110	216	230	165	169	107	111	233	235	100	102	139	177
1385	RUN1044	La Réunion	Mascarenes	REU032	-21.12015	55.753633	2012-01-25	T. François	P0Q	A1	x	A	210	218	96	100	181	181	147	149	128	134	128	156	184	232	110	110	220	220	169	169	94	111	233	239	102	102	139	141
1386	RUN1045	La Réunion	Mascarenes	REU032	-21.12015	55.753633	2012-01-25	T. François	P0Q	A1	x	A	210	218	96	102	181	181	147	149	134	134	128	128	184	184	110	110	228	232	169	169	107	111	NA	NA	102	102	139	139
1387	RUN1046	La Réunion	Mascarenes	REU032	-21.12015	55.753633	2012-01-25	T. François	P0Q	A1	x	A	210	214	96	100	181	181	136	136	134	134	128	144	184	184	106	108	222	234	169	169	94	107	233	251	94	94	139	141
1388	RUN1047	La Réunion	Mascarenes	REU032	-21.12015	55.753633	2012-01-25	T. François	P0Q	A1	x	A	210	210	96	102	177	181	147	149	133	134	128	142	184	232	110	110	216	230	169	177	94	107	233	233	102	104	129	177
1389	RUN1048	La Réunion	Mascarenes	REU032	-21.12015	55.753633	2012-01-25	T. François	P0Q	A1	x	A	210	212	100	100	177	179	136	147	133	133	128	146	184	234	106	110	230	232	169	181	94	111	237	239	94	102	133	177
1390	RUN1049	La Réunion	Mascarenes	REU032	-21.12015	55.753633	2012-01-25	T. François	P0Q	A1	x	A	210	214	96	100	179	181	136	136	132	133	128	128	184	220	106	110	216	230	169	169	94	111	231	247	94	102	129	133
1391	RUN1051	La Réunion	Mascarenes	REU032	-21.12015	55.753633	2012-01-25	T. François	P0Q	A1	x	A	214	226	102	102	179	181	149	149	132	134	128	145	184	184	106	110	216	218	175	175	94	111	235	243	100	102	141	177
1392	RUN1052	La Réunion	Mascarenes	REU032	-21.12015	55.753633	2012-01-25	T. François	P0Q	A1	x	A	210	210	102	102	181	181	149	149	132	133	128	162	184	226	110	110	218	232	NA	NA	94	111	235	241	98	102	129	141
1393	RUN1053	La Réunion	Mascarenes	REU032	-21.12015	55.753633	2012-01-25	T. François	P0Q	A1	x	A	214	218	102	102	181	181	140	149	132	134	128	154	184	212	106	110	230	230	NA	NA	107	107	235	235	94	102	177	183
1394	RUN1054	La Réunion	Mascarenes	REU032	-21.12015	55.753633	2012-01-25	T. François	P0Q	A1	x	A	210	214	96	102	175	181	136	149	134	134	128	142	184	184	110	110	218	220	165	177	94	111	235	249	94	102	139	141
1395	RUN1056	La Réunion	Mascarenes	REU032	-21.12015	55.753633	2012-01-25	T. François	P0Q	A1	x	A	210	210	100	102	181	181	140	147	133	134	128	128	184	184	106	110	216	216	165	169	92	94	241	249	94	94	141	149
1396	RUN1057	La Réunion	Mascarenes	REU032	-21.12015	55.753633	2012-01-25	T. François	P0Q	A1	x	A	214	216	100	102	181	181	136	149	128	133	128	156	174	232	106	110	230	232	169	169	111	111	225	239	94	102	177	181
1397	RUN1058	La Réunion	Mascarenes	REU032	-21.12015	55.753633	2012-01-25	T. François	P0Q	A1	x	A	212	218	102	102	177	181	147	149	133	133	142	154	184	184	106	110	222	230	169	177	107	111	233	237	94	102	141	141
1398	RUN1059	La Réunion	Mascarenes	REU032	-21.12015	55.753633	2012-01-25	T. François	P0Q	A1	x	A	210	214	96	102	177	179	147	149	133	134	128	158	184	202	110	110	230	230	169	181	107	111	239	239	94	94	141	179
1399	RUN1060	La Réunion	Mascarenes	REU032	-21.12015	55.753633	2012-01-25	T. François	P0Q	A1	x	A	214	218	96	102	181	181	136	149	134	134	145	152	184	184	106	110	216	230	169	175	111	111	229	239	94	104	137	141
1400	RUN1061	La Réunion	Mascarenes	REU032	-21.12015	55.753633	2012-01-25	T. François	P0Q	A1	x	A	210	210	100	102	175	177	136	149	133	133	148	166	184	202	106	110	230	230	165	165	107	111	233	237	94	102	141	141
1401	RUN1062	La Réunion	Mascarenes	REU032	-21.12015	55.753633	2012-01-25	T. François	P0Q	A1	x	A	210	214	102	102	177	181	136	147	133	134	128	145	184	184	106	106	218	232	169	181	111	113	233	243	94	94	177	181
1402	RUN1063	La Réunion	Mascarenes	REU032	-21.12015	55.753633	2012-01-25	T. François	P0Q	A1	x	A	210	218	100	102	177	177	147	149	133	133	128	140	184	232	106	110	216	232	169	181	94	107	225	233	94	102	139	177
1403	RUN1064	La Réunion	Mascarenes	REU032	-21.12015	55.753633	2012-01-25	T. François	P0Q	A1	x	A	210	218	100	102	177	177	147	147	133	133	128	140	174	232	106	106	216	232	169	181	94	107	225	233	94	102	139	177
1404	RUN1065	La Réunion	Mascarenes	REU032	-21.12015	55.753633	2012-01-25	T. François	P0Q	A1	x	A	210	210	102	102	175	177	136	136	133	134	128	128	184	184	106	106	230	230	169	169	94	111	233	237	94	102	177	181
1405	RUN1066	La Réunion	Mascarenes	REU032	-21.12015	55.753633	2012-01-25	T. François	P0Q	A1	A1_MAD3	A	214	218	100	102	181	181	149	149	132	134	128	128	184	232	106	106	230	232	169	169	94	111	233	235	94	100	131	177
1406	RUN1067	La Réunion	Mascarenes	REU032	-21.12015	55.753633	2012-01-25	T. François	P0Q	A1	x	A	226	226	96	102	181	181	149	149	133	133	148	156	184	184	106	110	226	230	165	169	92	94	239	241	94	104	139	179
1407	RUN1068	La Réunion	Mascarenes	REU032	-21.12015	55.753633	2012-01-25	T. François	P0Q	A1	x	A	210	226	102	102	181	183	149	149	133	133	160	166	184	184	106	106	222	226	169	177	94	111	233	241	94	102	129	181
1408	RUN1069	La Réunion	Mascarenes	REU032	-21.12015	55.753633	2012-01-25	T. François	P0Q	A1	x	A	210	214	96	102	177	177	136	149	128	134	128	128	184	184	106	110	216	230	169	177	107	112	233	239	94	94	149	177
1409	RUN1070	La Réunion	Mascarenes	REU032	-21.12015	55.753633	2012-01-25	T. François	P0Q	A1	x	A	210	210	100	102	181	191	136	149	133	133	128	145	184	184	106	108	230	234	169	169	111	113	243	243	94	102	139	177
1410	RUN1041	La Réunion	Mascarenes	REU032	-21.12015	55.753633	2012-01-25	T. François	Q	C1-C2	C2_d	C	212	218	102	102	179	181	136	149	128	134	128	166	184	202	106	106	218	230	177	181	110	111	229	233	102	102	141	177
1411	RUN1055	La Réunion	Mascarenes	REU032	-21.12015	55.753633	2012-01-25	T. François	Q	C1-C2	C2_d	C	212	214	102	102	181	181	136	149	133	134	128	166	174	184	106	106	230	232	169	169	94	107	233	237	94	102	141	181
1412	RUN1050	La Réunion	Mascarenes	REU032	-21.12015	55.753633	2012-01-25	T. François	PQQ	M4	M4_a	M	210	214	100	102	175	181	149	149	133	134	128	154	184	202	110	110	216	218	177	181	94	111	241	243	94	94	141	141
1413	RUN0723	La Réunion	Mascarenes	REU033	-21.122098	55.776514	2011-12-22	T. François	P0Q	A1	x	A	210	212	92	102	177	181	136	149	133	134	128	146	184	184	106	110	NA	NA	169	175	111	111	235	249	94	102	179	181
1414	RUN0724	La Réunion	Mascarenes	REU033	-21.122098	55.776514	2011-12-22	T. François	P0Q	A1	x	A	210	210	100	102	175	177	147	149	133	134	128	128	184	184	106	110	220	230	169	177	94	113	231	239	94	102	141	179
1415	RUN0725	La Réunion	Mascarenes	REU033	-21.122098	55.776514	2011-12-22	T. François	P0Q	A1	x	A	210	220	102	102	181	181	137	149	133	134	146	158	184	220	106	110	218	232	177	179	NA	NA	NA	NA	NA	NA	NA	NA
1416	RUN0726	La Réunion	Mascarenes	REU033	-21.122098	55.776514	2011-12-22	T. François	P0Q	A1	x	A	214	218	92	102	179	181	149	149	133	133	128	154	184	234	106	110	218	218	169	177	94	111	233	239	94	94	139	175
1417	RUN0727	La Réunion	Mascarenes	REU033	-21.122098	55.776514	2011-12-22	T. François	P0Q	A1	x	A	210	226	92	102	181	181	149	149	133	134	128	152	184	184	106	110	218	230	169	175	94	110	249	249	102	102	143	177
1418	RUN0729	La Réunion	Mascarenes	REU033	-21.122098	55.776514	2011-12-22	T. François	P0Q	A1	x	A	210	218	102	102	179	181	136	149	132	133	128	148	184	184	106	106	216	216	169	181	94	107	237	249	94	94	139	141
1419	RUN0730	La Réunion	Mascarenes	REU033	-21.122098	55.776514	2011-12-22	T. François	P0Q	A1	x	A	210	210	102	102	177	181	149	149	133	134	128	128	184	230	110	110	226	230	169	169	94	112	243	243	94	102	177	185
1420	RUN0731	La Réunion	Mascarenes	REU033	-21.122098	55.776514	2011-12-22	T. François	P0Q	A1	x	A	218	218	100	100	181	183	136	149	133	134	128	128	184	184	106	110	222	234	175	175	110	111	233	239	94	102	133	179
1421	RUN0732	La Réunion	Mascarenes	REU033	-21.122098	55.776514	2011-12-22	T. François	P0Q	A1	A1_MAD3	A	210	214	100	102	175	179	147	149	133	134	128	128	174	184	106	106	220	230	169	177	94	111	239	239	102	102	129	147
1422	RUN0733	La Réunion	Mascarenes	REU033	-21.122098	55.776514	2011-12-22	T. François	P0Q	A1	x	A	210	210	96	102	181	181	136	149	133	134	128	128	184	184	106	110	222	230	175	175	94	94	231	237	104	104	129	133
1423	RUN0734	La Réunion	Mascarenes	REU033	-21.122098	55.776514	2011-12-22	T. François	P0Q	A1	x	A	210	212	92	102	177	181	136	149	128	132	128	128	184	220	110	110	220	230	169	181	94	111	225	233	102	102	129	131
1424	RUN0735	La Réunion	Mascarenes	REU033	-21.122098	55.776514	2011-12-22	T. François	P0Q	A1	x	A	214	226	102	102	175	181	147	149	128	133	128	128	184	212	110	110	220	230	169	181	94	111	235	241	102	104	147	175
1425	RUN0736	La Réunion	Mascarenes	REU033	-21.122098	55.776514	2011-12-22	T. François	P0Q	A1	x	A	212	214	102	102	179	183	136	149	128	133	131	148	184	184	106	110	218	218	165	169	111	111	233	235	94	104	133	141
1426	RUN0737	La Réunion	Mascarenes	REU033	-21.122098	55.776514	2011-12-22	T. François	P0Q	A1	x	A	214	218	102	102	177	177	147	149	134	134	128	156	184	184	106	110	216	230	165	169	111	111	237	247	94	94	139	177
1427	RUN0738	La Réunion	Mascarenes	REU033	-21.122098	55.776514	2011-12-22	T. François	P0Q	A1	x	A	214	214	100	100	177	181	136	152	132	132	128	128	184	234	106	106	218	236	169	177	94	111	239	239	94	102	141	185
1428	RUN0739	La Réunion	Mascarenes	REU033	-21.122098	55.776514	2011-12-22	T. François	P0Q	A1	x	A	210	214	100	102	179	181	147	149	133	134	128	154	184	220	106	110	220	222	169	177	94	94	239	239	94	102	175	177
1429	RUN0740	La Réunion	Mascarenes	REU033	-21.122098	55.776514	2011-12-22	T. François	P0Q	A1	x	A	210	218	102	102	181	181	147	147	134	134	146	150	184	184	110	110	216	230	169	169	111	111	233	239	94	102	183	183
1430	RUN0741	La Réunion	Mascarenes	REU033	-21.122098	55.776514	2011-12-22	T. François	P0Q	A1	x	A	218	226	96	96	175	181	147	149	128	132	128	128	184	184	106	106	220	230	177	181	94	99	NA	NA	94	94	141	141
1431	RUN0742	La Réunion	Mascarenes	REU033	-21.122098	55.776514	2011-12-22	T. François	P0Q	A1	x	A	210	214	92	100	175	181	136	149	133	134	128	144	184	184	110	110	220	230	169	169	94	111	233	239	94	94	141	177
1432	RUN0743	La Réunion	Mascarenes	REU033	-21.122098	55.776514	2011-12-22	T. François	P0Q	A1	x	A	210	226	100	102	181	181	149	149	132	133	128	128	184	234	110	110	228	230	179	179	94	107	233	233	94	102	175	181
1433	RUN0728	La Réunion	Mascarenes	REU033	-21.122098	55.776514	2011-12-22	T. François	Q	C1-C2	C2_d	C	210	214	96	102	177	181	136	136	128	133	128	162	184	184	110	110	220	220	175	177	107	111	237	243	94	102	139	139
1434	RUN0665	La Réunion	Mascarenes	REU034	-21.169024	55.824382	2011-12-22	T. François	P0Q	A1	x	A	210	218	100	102	181	181	136	149	134	134	152	156	184	232	106	110	230	232	165	169	107	111	233	239	94	102	141	179
1435	RUN0666	La Réunion	Mascarenes	REU034	-21.169024	55.824382	2011-12-22	T. François	P0Q	A1	x	A	212	214	102	102	177	179	149	149	128	133	128	140	184	202	106	106	216	218	169	169	112	116	239	243	100	100	141	185
1436	RUN0667	La Réunion	Mascarenes	REU034	-21.169024	55.824382	2011-12-22	T. François	P0Q	A1	A1_MAD3	A	210	214	96	100	177	177	149	149	128	132	128	142	184	234	110	110	220	230	169	169	99	111	233	235	94	102	133	167
1437	RUN0668_2	La Réunion	Mascarenes	REU034	-21.169024	55.824382	2011-12-22	T. François	P0Q	A1	x	A	212	214	96	100	179	181	149	149	128	133	128	128	184	202	110	110	220	232	169	181	94	111	229	233	94	104	141	141
1438	RUN0670	La Réunion	Mascarenes	REU034	-21.169024	55.824382	2011-12-22	T. François	P0Q	A1	x	A	210	214	96	100	181	181	140	147	134	134	128	160	184	184	106	110	218	220	169	179	110	113	233	239	94	102	139	179
1439	RUN0671	La Réunion	Mascarenes	REU034	-21.169024	55.824382	2011-12-22	T. François	P0Q	A1	x	A	210	214	100	102	175	181	149	149	133	133	128	128	184	210	106	106	218	230	165	169	94	107	233	239	94	102	139	181
1440	RUN0672	La Réunion	Mascarenes	REU034	-21.169024	55.824382	2011-12-22	T. François	P0Q	A1	x	A	216	218	100	102	181	181	136	149	133	133	128	156	184	184	106	106	216	216	181	181	111	111	233	235	102	102	177	177
1441	RUN0673	La Réunion	Mascarenes	REU034	-21.169024	55.824382	2011-12-22	T. François	P0Q	A1	x	A	210	224	96	100	179	181	140	149	133	134	152	156	204	234	110	110	230	232	169	169	94	94	233	235	102	104	139	177
1442	RUN0675	La Réunion	Mascarenes	REU034	-21.169024	55.824382	2011-12-22	T. François	P0Q	A1	x	A	212	214	100	100	181	181	136	149	132	134	128	128	184	210	106	110	216	230	169	179	107	107	233	233	94	102	177	181
1443	RUN0676	La Réunion	Mascarenes	REU034	-21.169024	55.824382	2011-12-22	T. François	P0Q	A1	x	A	214	218	100	100	181	183	149	149	134	134	128	142	184	232	106	110	218	218	169	181	94	111	233	241	102	102	139	141
1444	RUN0677	La Réunion	Mascarenes	REU034	-21.169024	55.824382	2011-12-22	T. François	P0Q	A1	x	A	210	218	100	102	179	181	136	136	132	134	128	156	184	184	106	106	222	230	169	179	111	111	237	239	94	102	141	179
1445	RUN0678	La Réunion	Mascarenes	REU034	-21.169024	55.824382	2011-12-22	T. François	P0Q	A1	x	A	210	210	102	102	181	181	136	149	133	134	128	148	184	184	106	110	230	232	169	169	94	111	237	243	94	104	129	139
1446	RUN0680	La Réunion	Mascarenes	REU034	-21.169024	55.824382	2011-12-22	T. François	P0Q	A1	x	A	210	210	96	102	181	181	149	149	132	134	128	156	184	184	106	110	216	230	169	177	107	107	235	239	102	102	139	181
1447	RUN0681	La Réunion	Mascarenes	REU034	-21.169024	55.824382	2011-12-22	T. François	P0Q	A1	x	A	210	218	100	102	181	181	149	149	133	133	148	156	184	202	106	110	220	230	165	169	94	94	239	239	100	100	141	177
1448	RUN0682	La Réunion	Mascarenes	REU034	-21.169024	55.824382	2011-12-22	T. François	P0Q	A1	x	A	210	218	102	102	177	181	149	149	132	133	148	156	184	202	106	110	230	230	165	179	94	94	235	239	100	100	139	141
1449	RUN0683	La Réunion	Mascarenes	REU034	-21.169024	55.824382	2011-12-22	T. François	P0Q	A1	x	A	210	214	96	102	179	181	147	147	134	134	128	158	184	184	106	106	230	230	165	181	111	111	233	239	94	102	177	183
1450	RUN0684	La Réunion	Mascarenes	REU034	-21.169024	55.824382	2011-12-22	T. François	P0Q	A1	x	A	210	210	96	102	179	181	136	151	134	134	128	146	184	232	106	110	216	222	177	177	94	111	235	243	94	102	129	181
1451	RUN0687	La Réunion	Mascarenes	REU034	-21.169024	55.824382	2011-12-22	T. François	P0Q	A1	x	A	210	220	100	102	175	191	136	147	133	133	128	128	174	184	106	110	216	232	169	169	94	111	233	235	94	102	131	141
1452	RUN0688	La Réunion	Mascarenes	REU034	-21.169024	55.824382	2011-12-22	T. François	P0Q	A1	x	A	214	214	102	102	175	181	149	149	134	134	128	128	184	184	106	110	216	232	165	169	111	111	233	233	102	102	133	139
1453	RUN0689	La Réunion	Mascarenes	REU034	-21.169024	55.824382	2011-12-22	T. François	P0Q	A1	x	A	214	222	100	102	179	181	140	147	133	133	128	152	184	232	106	110	220	230	169	169	111	111	235	239	94	100	141	175
1454	RUN0690	La Réunion	Mascarenes	REU034	-21.169024	55.824382	2011-12-22	T. François	P0Q	A1	x	A	212	226	100	102	175	183	149	149	132	133	128	158	184	184	106	106	218	230	169	177	94	111	225	237	94	94	181	181
1455	RUN0691	La Réunion	Mascarenes	REU034	-21.169024	55.824382	2011-12-22	T. François	P0Q	A1	x	A	210	212	100	102	181	181	149	149	133	134	156	162	184	220	106	106	216	222	169	169	107	111	237	239	94	102	177	181
1456	RUN0692	La Réunion	Mascarenes	REU034	-21.169024	55.824382	2011-12-22	T. François	P0Q	A1	x	A	214	214	100	102	175	181	136	149	132	134	128	128	184	202	106	106	216	230	169	181	94	94	239	239	94	102	139	179
1457	RUN0693	La Réunion	Mascarenes	REU034	-21.169024	55.824382	2011-12-22	T. François	P0Q	A1	x	A	210	210	96	102	181	181	136	136	133	134	128	128	184	212	106	110	232	232	169	181	92	94	233	239	94	94	139	147
1458	RUN0694	La Réunion	Mascarenes	REU034	-21.169024	55.824382	2011-12-22	T. François	P0Q	A1	x	A	210	220	96	100	181	191	136	149	133	134	126	128	184	184	106	110	222	234	175	175	107	111	237	239	82	102	173	181
1459	RUN0695	La Réunion	Mascarenes	REU034	-21.169024	55.824382	2011-12-22	T. François	P0Q	A1	x	A	214	224	100	102	181	181	147	149	133	133	128	148	184	232	106	110	230	230	169	169	94	111	233	235	94	102	141	175
1460	RUN0696	La Réunion	Mascarenes	REU034	-21.169024	55.824382	2011-12-22	T. François	P0Q	A1	x	A	210	218	100	102	177	181	140	147	133	134	126	156	184	184	106	106	230	232	169	177	94	116	225	225	94	94	129	177
1461	RUN0698	La Réunion	Mascarenes	REU034	-21.169024	55.824382	2011-12-22	T. François	P0Q	A1	x	A	218	222	96	102	177	181	149	149	133	133	154	166	202	214	106	110	234	234	169	175	94	116	225	237	94	102	177	181
1462	RUN0674	La Réunion	Mascarenes	REU034	-21.169024	55.824382	2011-12-22	T. François	Q	C1-C2	C2_a	C	210	214	92	100	179	183	149	149	132	133	128	132	184	230	106	106	230	230	169	175	94	111	239	243	94	94	133	141
1463	RUN0679	La Réunion	Mascarenes	REU034	-21.169024	55.824382	2011-12-22	T. François	Q	C1-C2	C2_d	C	210	210	102	102	181	183	147	151	133	133	128	144	184	184	106	110	216	222	181	181	107	111	235	243	94	102	139	141
1464	RUN0686	La Réunion	Mascarenes	REU034	-21.169024	55.824382	2011-12-22	T. François	Q	C1-C2	C2_d	C	210	214	96	96	175	177	136	149	132	134	128	142	184	184	106	110	214	230	177	177	111	111	225	225	94	102	135	181
1465	RUN0697	La Réunion	Mascarenes	REU034	-21.169024	55.824382	2011-12-22	T. François	Q	C1-C2	C2_d	C	214	226	100	102	177	183	149	149	133	134	128	146	184	232	106	106	216	222	177	181	107	111	239	241	94	100	137	181
1466	RUN0669	La Réunion	Mascarenes	REU034	-21.169024	55.824382	2011-12-22	T. François	Not succesful	Not succesful	x	NA	210	210	96	102	175	181	147	149	133	134	128	128	184	184	106	106	220	232	165	169	107	107	233	233	100	100	139	183
1467	RUN0685	La Réunion	Mascarenes	REU034	-21.169024	55.824382	2011-12-22	T. François	Not succesful	Not succesful	x	NA	218	218	96	102	175	181	136	136	133	134	152	156	184	184	110	110	216	232	169	169	107	111	235	237	94	102	129	139
1468	RUN0699	La Réunion	Mascarenes	REU035	-21.186788	55.807484	2011-12-22	T. François	P0Q	A1	x	A	214	214	92	102	175	177	149	149	133	134	156	174	184	184	110	110	216	232	169	181	111	111	239	241	94	102	139	141
1469	RUN0700	La Réunion	Mascarenes	REU035	-21.186788	55.807484	2011-12-22	T. François	P0Q	A1	x	A	210	210	102	102	177	181	136	149	133	134	128	131	184	184	106	106	230	232	165	169	107	113	237	239	94	102	129	181
1470	RUN0701	La Réunion	Mascarenes	REU035	-21.186788	55.807484	2011-12-22	T. François	P0Q	A1	x	A	214	218	100	100	179	181	136	149	128	133	160	160	184	184	106	106	220	232	165	177	107	111	225	247	94	102	179	181
1471	RUN0702	La Réunion	Mascarenes	REU035	-21.186788	55.807484	2011-12-22	T. François	P0Q	A1	x	A	210	214	102	102	177	177	147	149	134	134	128	152	184	184	106	106	216	230	169	169	94	107	233	241	94	94	139	177
1472	RUN0703	La Réunion	Mascarenes	REU035	-21.186788	55.807484	2011-12-22	T. François	P0Q	A1	x	A	210	214	96	102	177	181	149	149	132	134	128	145	184	184	106	110	222	230	169	175	110	111	233	237	102	102	139	143
1473	RUN0704	La Réunion	Mascarenes	REU035	-21.186788	55.807484	2011-12-22	T. François	P0Q	A1	x	A	210	220	100	102	175	181	137	149	133	134	128	144	184	184	106	110	216	226	169	169	94	111	235	249	94	94	127	181
1474	RUN0705	La Réunion	Mascarenes	REU035	-21.186788	55.807484	2011-12-22	T. François	P0Q	A1	x	A	210	212	100	102	179	181	136	147	132	133	128	128	184	184	106	110	218	232	169	169	94	107	239	239	102	104	141	181
1475	RUN0706	La Réunion	Mascarenes	REU035	-21.186788	55.807484	2011-12-22	T. François	P0Q	A1	x	A	210	218	102	102	177	179	136	149	133	134	126	128	184	184	106	110	218	230	169	175	94	94	243	243	94	102	141	177
1476	RUN0708	La Réunion	Mascarenes	REU035	-21.186788	55.807484	2011-12-22	T. François	P0Q	A1	x	A	210	214	100	102	177	181	136	147	128	134	128	145	184	184	110	110	220	222	169	177	107	111	225	239	94	102	143	147
1477	RUN0709	La Réunion	Mascarenes	REU035	-21.186788	55.807484	2011-12-22	T. François	P0Q	A1	x	A	218	218	96	96	179	181	136	147	134	134	128	131	232	232	106	106	220	220	169	169	111	111	235	243	102	104	129	181
1478	RUN0710	La Réunion	Mascarenes	REU035	-21.186788	55.807484	2011-12-22	T. François	P0Q	A1	x	A	210	218	96	100	177	181	136	149	134	134	128	142	184	184	106	110	228	230	177	179	94	111	235	239	94	102	141	177
1479	RUN0711	La Réunion	Mascarenes	REU035	-21.186788	55.807484	2011-12-22	T. François	P0Q	A1	x	A	210	210	96	102	181	191	136	147	134	134	128	156	184	184	106	110	220	232	NA	NA	107	111	233	239	94	94	175	181
1480	RUN0712	La Réunion	Mascarenes	REU035	-21.186788	55.807484	2011-12-22	T. François	P0Q	A1	x	A	212	214	102	102	177	177	147	147	132	132	128	128	184	184	106	106	220	220	165	175	111	111	231	249	94	104	141	141
1481	RUN0713	La Réunion	Mascarenes	REU035	-21.186788	55.807484	2011-12-22	T. François	P0Q	A1	x	A	214	216	102	102	177	181	136	147	133	134	128	130	184	202	106	106	216	216	165	169	111	111	233	235	102	104	141	181
1482	RUN0714	La Réunion	Mascarenes	REU035	-21.186788	55.807484	2011-12-22	T. François	P0Q	A1	x	A	210	210	96	100	177	179	147	147	132	134	128	142	184	228	106	110	228	230	169	169	94	113	233	241	94	94	141	167
1483	RUN0715	La Réunion	Mascarenes	REU035	-21.186788	55.807484	2011-12-22	T. François	P0Q	A1	x	A	210	210	102	102	175	181	147	147	134	134	128	156	184	184	106	110	220	232	177	179	107	111	233	239	94	94	175	181
1484	RUN0717	La Réunion	Mascarenes	REU035	-21.186788	55.807484	2011-12-22	T. François	P0Q	A1	x	A	210	226	92	100	181	183	147	149	132	133	128	146	184	184	106	110	216	220	165	169	94	111	239	243	102	102	129	133
1485	RUN0718	La Réunion	Mascarenes	REU035	-21.186788	55.807484	2011-12-22	T. François	P0Q	A1	x	A	210	214	92	102	181	181	136	149	133	134	128	128	184	184	106	110	222	234	175	175	94	94	225	233	94	94	139	179
1486	RUN0719	La Réunion	Mascarenes	REU035	-21.186788	55.807484	2011-12-22	T. François	P0Q	A1	x	A	210	214	102	102	181	181	136	149	133	134	128	128	184	184	106	110	222	232	175	175	111	116	233	237	94	104	133	141
1487	RUN0720	La Réunion	Mascarenes	REU035	-21.186788	55.807484	2011-12-22	T. François	P0Q	A1	x	A	210	210	96	96	181	181	136	149	133	133	128	148	184	238	106	110	222	230	169	181	94	111	235	243	102	104	141	181
1488	RUN0721	La Réunion	Mascarenes	REU035	-21.186788	55.807484	2011-12-22	T. François	P0Q	A1	x	A	214	226	96	100	181	181	149	149	133	134	156	174	184	184	110	110	230	232	169	181	94	111	231	233	102	102	139	181
1489	RUN0722	La Réunion	Mascarenes	REU035	-21.186788	55.807484	2011-12-22	T. François	P0Q	A1	x	A	210	214	100	102	175	181	149	149	132	132	128	128	184	184	106	106	230	232	169	181	107	111	233	233	94	94	129	133
1490	RUN0707	La Réunion	Mascarenes	REU035	-21.186788	55.807484	2011-12-22	T. François	Q	C1-C2	C2_c	C	210	214	100	100	181	181	136	149	133	134	142	156	184	184	106	110	216	218	169	179	94	111	229	249	94	102	139	177
1491	RUN0716	La Réunion	Mascarenes	REU035	-21.186788	55.807484	2011-12-22	T. François	Q	C1-C2	C2_a	C	210	214	102	102	181	181	136	149	137	137	128	128	184	184	106	106	228	230	169	169	94	111	225	239	94	94	177	181
1492	RUN0384	La Réunion	Mascarenes	REU036	-21.352167	55.757283	2011-12-14	T. François	P0Q	A1	x	A	210	214	102	102	181	181	136	149	130	133	128	160	184	184	106	106	218	222	177	181	94	111	235	239	94	104	141	183
1493	RUN0385	La Réunion	Mascarenes	REU036	-21.352167	55.757283	2011-12-14	T. François	P0Q	A1	x	A	210	214	96	100	179	181	147	152	133	134	128	128	184	228	106	110	216	232	169	179	94	117	233	237	94	102	141	181
1494	RUN0386	La Réunion	Mascarenes	REU036	-21.352167	55.757283	2011-12-14	T. François	P0Q	A1	x	A	214	226	102	102	181	181	147	149	133	134	128	140	184	242	106	106	216	218	169	181	94	94	233	237	102	102	133	181
1495	RUN0387	La Réunion	Mascarenes	REU036	-21.352167	55.757283	2011-12-14	T. François	P0Q	A1	x	A	210	218	100	102	177	181	149	149	133	134	128	146	184	232	106	110	220	224	169	181	110	111	225	235	94	104	141	141
1496	RUN0388	La Réunion	Mascarenes	REU036	-21.352167	55.757283	2011-12-14	T. François	P0Q	A1	x	A	210	218	102	104	175	181	136	147	132	133	128	140	184	212	106	110	216	222	NA	NA	107	113	235	241	102	102	129	179
1497	RUN0389	La Réunion	Mascarenes	REU036	-21.352167	55.757283	2011-12-14	T. François	P0Q	A1	x	A	210	226	100	102	181	181	136	149	132	134	128	148	184	184	106	110	212	216	169	169	107	111	239	241	102	102	139	139
1498	RUN0390_2	La Réunion	Mascarenes	REU036	-21.352167	55.757283	2011-12-14	T. François	P0Q	A1	x	A	214	222	92	100	177	181	136	149	132	133	128	140	184	184	106	110	220	230	169	179	94	111	233	233	94	94	129	139
1499	RUN0391	La Réunion	Mascarenes	REU036	-21.352167	55.757283	2011-12-14	T. François	P0Q	A1	A1_MAD3	A	210	218	100	102	177	181	149	149	133	134	128	146	184	232	106	110	220	224	169	169	110	111	235	239	94	104	141	141
1500	RUN0392	La Réunion	Mascarenes	REU036	-21.352167	55.757283	2011-12-14	T. François	P0Q	A1	x	A	210	218	96	102	181	181	136	145	133	134	128	158	184	184	106	106	216	230	175	181	NA	NA	NA	NA	NA	NA	NA	NA
1501	RUN0393	La Réunion	Mascarenes	REU036	-21.352167	55.757283	2011-12-14	T. François	P0Q	A1	x	A	212	214	100	102	177	177	136	136	134	134	128	142	184	184	106	110	218	218	169	169	94	111	237	239	94	102	139	179
1502	RUN0394	La Réunion	Mascarenes	REU036	-21.352167	55.757283	2011-12-14	T. François	P0Q	A1	x	A	214	222	100	100	177	177	140	149	133	134	126	142	184	184	106	110	230	236	169	169	94	111	239	249	102	104	139	139
1503	RUN0395	La Réunion	Mascarenes	REU036	-21.352167	55.757283	2011-12-14	T. François	P0Q	A1	x	A	210	210	100	102	177	177	136	136	128	134	128	128	184	184	106	106	216	222	165	169	107	111	235	237	94	102	129	141
1504	RUN0396	La Réunion	Mascarenes	REU036	-21.352167	55.757283	2011-12-14	T. François	P0Q	A1	x	A	210	214	96	102	177	181	136	149	132	134	128	128	184	202	106	106	220	230	169	177	92	107	237	239	94	102	177	181
1505	RUN0397	La Réunion	Mascarenes	REU036	-21.352167	55.757283	2011-12-14	T. François	P0Q	A1	x	A	210	212	100	102	181	181	147	149	132	133	128	128	184	184	106	110	220	230	NA	NA	NA	NA	NA	NA	NA	NA	NA	NA
1506	RUN0398	La Réunion	Mascarenes	REU036	-21.352167	55.757283	2011-12-14	T. François	P0Q	A1	x	A	210	210	102	102	177	181	149	151	128	128	142	148	184	184	106	110	230	230	169	169	94	111	225	235	94	104	133	181
1507	RUN0399	La Réunion	Mascarenes	REU036	-21.352167	55.757283	2011-12-14	T. François	P0Q	A1	x	A	214	218	96	102	181	181	149	149	133	134	128	160	184	184	106	110	230	230	169	179	94	113	233	245	94	94	141	141
1508	RUN0400	La Réunion	Mascarenes	REU036	-21.352167	55.757283	2011-12-14	T. François	P0Q	A1	x	A	210	218	100	102	177	181	147	149	132	134	128	142	184	184	106	110	216	218	169	177	94	111	241	243	94	102	141	181
1509	RUN0401	La Réunion	Mascarenes	REU036	-21.352167	55.757283	2011-12-14	T. François	P0Q	A1	x	A	210	212	102	102	177	177	147	149	134	134	126	128	184	184	106	110	216	220	177	181	94	111	237	241	94	102	135	141
1510	RUN0402	La Réunion	Mascarenes	REU036	-21.352167	55.757283	2011-12-14	T. François	P0Q	A1	x	A	210	210	96	100	175	181	140	149	133	134	128	150	184	184	110	110	232	232	165	181	94	107	239	249	94	98	139	177
1511	RUN0403	La Réunion	Mascarenes	REU036	-21.352167	55.757283	2011-12-14	T. François	P0Q	A1	x	A	210	214	102	102	175	183	147	147	133	134	128	148	184	184	106	110	218	230	169	181	107	111	233	239	102	104	141	183
1512	RUN0404	La Réunion	Mascarenes	REU036	-21.352167	55.757283	2011-12-14	T. François	P0Q	A1	x	A	210	214	102	102	181	181	149	149	134	134	148	152	184	184	106	110	218	230	169	169	111	116	233	233	100	104	141	181
1513	RUN0405_2	La Réunion	Mascarenes	REU036	-21.352167	55.757283	2011-12-14	T. François	P0Q	A1	x	A	210	210	96	100	175	181	147	149	128	134	128	146	184	184	106	110	230	230	165	165	94	110	235	239	94	102	141	185
1514	RUN0406_2	La Réunion	Mascarenes	REU036	-21.352167	55.757283	2011-12-14	T. François	P0Q	A1	x	A	210	210	100	102	175	177	147	149	132	133	128	170	220	232	106	110	216	222	169	169	99	107	233	239	94	94	147	181
1515	RUN1380	La Réunion	Mascarenes	REU037	-21.3439	55.747467	2010-06-10	T. François	Q	C1-C2	x	C	210	220	96	102	181	181	147	149	133	134	128	144	184	232	106	106	220	220	169	179	107	111	NA	NA	94	104	139	181
1516	RUN1600_2	La Réunion	Mascarenes	REU038	-21.362003	55.732400	2012-03-29	T. François	P0Q	A1	x	A	210	210	102	102	181	187	149	149	133	134	128	146	184	184	106	110	224	230	169	177	94	111	239	239	102	102	129	177
1517	RUN1601	La Réunion	Mascarenes	REU038	-21.362003	55.732400	2012-03-29	T. François	P0Q	A1	x	A	210	210	102	102	181	181	147	149	134	134	NA	NA	184	184	106	106	NA	NA	169	169	107	111	235	243	94	102	133	179
1518	RUN1602	La Réunion	Mascarenes	REU038	-21.362003	55.732400	2012-03-29	T. François	P0Q	A1	x	A	214	218	96	102	NA	NA	136	149	132	132	NA	NA	184	184	110	110	NA	NA	169	181	94	111	225	233	102	102	129	139
1519	RUN1603	La Réunion	Mascarenes	REU038	-21.362003	55.732400	2012-03-29	T. François	P0Q	A1	x	A	212	214	100	102	181	187	136	147	133	133	128	128	184	206	106	110	216	230	179	179	110	110	235	249	102	102	133	133
1520	RUN1002	La Réunion	Mascarenes	REU038	-21.362003	55.732400	2011-04-04	T. François	Q	C1-C2	x	C	210	218	96	102	181	181	149	149	133	134	128	146	184	184	110	110	222	232	169	169	107	107	235	239	94	102	133	181
1521	RUN0414	La Réunion	Mascarenes	REU039	-21.3645	55.72375	2011-12-15	T. François	P0Q	A1	x	A	210	210	102	104	179	181	136	136	134	134	160	160	184	184	106	110	214	216	169	181	94	111	233	233	94	102	129	141
1522	RUN0415	La Réunion	Mascarenes	REU039	-21.3645	55.72375	2011-12-15	T. François	P0Q	A1	x	A	214	218	100	102	177	181	147	149	132	134	142	148	184	184	106	106	222	230	169	169	111	113	233	239	102	102	139	181
1523	RUN0416_2	La Réunion	Mascarenes	REU039	-21.3645	55.72375	2011-12-15	T. François	P0Q	A1	x	A	210	218	96	102	181	181	136	149	132	134	128	128	184	232	106	110	230	232	177	181	107	111	239	249	102	104	139	177
1524	RUN0417	La Réunion	Mascarenes	REU039	-21.3645	55.72375	2011-12-15	T. François	P0Q	A1	x	A	210	210	96	96	181	181	149	151	134	134	146	160	202	220	106	106	216	236	177	177	94	111	233	243	94	94	177	181
1525	RUN0418	La Réunion	Mascarenes	REU039	-21.3645	55.72375	2011-12-15	T. François	P0Q	A1	x	A	210	226	100	102	175	179	136	149	134	134	128	128	184	184	106	110	220	232	169	169	99	116	233	247	102	102	181	181
1526	RUN0419	La Réunion	Mascarenes	REU039	-21.3645	55.72375	2011-12-15	T. François	P0Q	A1	A1_MAD3	A	218	226	100	102	175	181	136	149	132	134	126	160	184	232	106	110	220	234	169	177	94	107	237	245	94	94	129	183
1527	RUN0420	La Réunion	Mascarenes	REU039	-21.3645	55.72375	2011-12-15	T. François	P0Q	A1	x	A	210	210	100	100	177	181	136	147	132	133	142	162	184	184	106	106	216	232	169	181	110	111	239	239	94	102	177	181
1528	RUN0421	La Réunion	Mascarenes	REU039	-21.3645	55.72375	2011-12-15	T. François	P0Q	A1	x	A	210	210	100	102	181	181	149	149	133	134	128	160	184	184	106	110	222	230	NA	NA	111	111	NA	NA	NA	NA	NA	NA
1529	RUN0422	La Réunion	Mascarenes	REU039	-21.3645	55.72375	2011-12-15	T. François	P0Q	A1	x	A	210	214	102	102	181	181	136	149	133	133	130	156	184	184	106	106	216	216	169	179	NA	NA	NA	NA	NA	NA	NA	NA
1530	RUN0424	La Réunion	Mascarenes	REU039	-21.3645	55.72375	2011-12-15	T. François	P0Q	A1	x	A	210	214	96	102	175	181	136	149	134	134	128	128	184	184	106	110	220	232	169	179	107	107	225	243	94	104	177	179
1531	RUN0425_2	La Réunion	Mascarenes	REU039	-21.3645	55.72375	2011-12-15	T. François	P0Q	A1	x	A	210	210	92	102	175	177	147	149	134	134	128	148	184	184	106	106	230	230	169	177	94	111	235	237	94	94	129	141
1532	RUN0426	La Réunion	Mascarenes	REU039	-21.3645	55.72375	2011-12-15	T. François	P0Q	A1	x	A	210	218	96	100	177	181	136	147	132	134	128	128	184	184	106	110	216	230	169	181	94	111	237	241	94	102	139	181
1533	RUN0427	La Réunion	Mascarenes	REU039	-21.3645	55.72375	2011-12-15	T. François	P0Q	A1	x	A	210	214	102	102	181	181	136	149	134	134	128	131	184	184	106	110	220	232	169	169	107	107	237	237	94	102	141	141
1534	RUN0428	La Réunion	Mascarenes	REU039	-21.3645	55.72375	2011-12-15	T. François	P0Q	A1	x	A	210	214	96	100	181	181	147	149	133	134	128	144	184	234	106	106	216	240	169	169	94	111	239	241	94	100	139	141
1535	RUN0429	La Réunion	Mascarenes	REU039	-21.3645	55.72375	2011-12-15	T. François	P0Q	A1	x	A	210	214	102	102	181	181	149	149	128	134	128	162	184	220	106	110	232	232	165	169	94	111	239	239	94	94	141	177
1536	RUN0430	La Réunion	Mascarenes	REU039	-21.3645	55.72375	2011-12-15	T. François	P0Q	A1	x	A	212	214	102	102	177	179	149	149	132	134	128	154	184	184	106	110	224	232	173	179	107	111	239	239	102	104	167	177
1537	RUN0431	La Réunion	Mascarenes	REU039	-21.3645	55.72375	2011-12-15	T. François	P0Q	A1	x	A	212	218	102	102	177	179	140	149	132	134	150	156	184	184	106	110	214	216	177	181	107	111	235	249	102	102	181	181
1538	RUN0432	La Réunion	Mascarenes	REU039	-21.3645	55.72375	2011-12-15	T. François	P0Q	A1	x	A	214	214	102	102	177	181	149	149	133	133	126	154	184	232	110	110	222	222	169	169	107	107	NA	NA	94	94	141	141
1539	RUN0433	La Réunion	Mascarenes	REU039	-21.3645	55.72375	2011-12-15	T. François	P0Q	A1	x	A	212	214	102	102	175	181	136	140	128	132	128	128	184	184	106	106	218	230	169	179	110	111	235	245	94	104	141	181
1540	RUN0434	La Réunion	Mascarenes	REU039	-21.3645	55.72375	2011-12-15	T. François	P0Q	A1	x	A	210	214	100	102	175	175	136	140	134	134	128	128	184	220	106	110	230	232	169	169	94	111	233	249	94	102	131	177
1541	RUN0435	La Réunion	Mascarenes	REU039	-21.3645	55.72375	2011-12-15	T. François	P0Q	A1	x	A	212	212	100	102	181	181	149	149	128	134	128	128	184	184	106	110	230	232	169	169	NA	NA	NA	NA	NA	NA	NA	NA
1542	RUN0436_2	La Réunion	Mascarenes	REU039	-21.3645	55.72375	2011-12-15	T. François	P0Q	A1	x	A	212	214	96	102	177	179	147	147	128	134	128	128	184	202	106	106	222	230	169	177	92	94	233	233	94	94	147	177
1543	RUN0437	La Réunion	Mascarenes	REU039	-21.3645	55.72375	2011-12-15	T. François	P0Q	A1	x	A	212	214	96	102	181	181	149	149	132	134	128	156	184	184	110	110	230	230	169	181	111	111	239	239	94	102	175	177
1544	RUN0438	La Réunion	Mascarenes	REU039	-21.3645	55.72375	2011-12-15	T. François	P0Q	A1	x	A	210	210	100	102	175	181	136	149	132	134	128	142	184	184	106	110	216	232	169	175	94	111	237	239	94	102	177	179
1545	RUN0439	La Réunion	Mascarenes	REU039	-21.3645	55.72375	2011-12-15	T. François	P0Q	A1	x	A	210	228	100	102	175	177	149	149	133	133	128	160	184	184	106	110	216	230	169	169	94	111	237	237	94	94	129	135
1546	RUN0440	La Réunion	Mascarenes	REU039	-21.3645	55.72375	2011-12-15	T. François	P0Q	A1	A1_MAD3	A	210	210	96	102	177	181	147	149	133	134	128	148	184	184	110	110	220	220	169	181	92	111	233	239	94	104	141	177
1547	RUN0441	La Réunion	Mascarenes	REU039	-21.3645	55.72375	2011-12-15	T. François	P0Q	A1	x	A	210	218	100	102	177	181	147	149	133	133	128	128	184	184	106	110	216	216	169	181	94	107	239	239	104	112	129	181
1548	RUN0442	La Réunion	Mascarenes	REU039	-21.3645	55.72375	2011-12-15	T. François	P0Q	A1	x	A	210	212	102	102	177	181	140	149	133	133	128	132	184	184	106	106	220	230	169	169	94	111	233	239	94	102	129	139
1549	RUN0444	La Réunion	Mascarenes	REU039	-21.3645	55.72375	2011-12-15	T. François	P0Q	A1	x	A	210	210	96	96	179	181	147	149	128	134	128	146	184	184	106	106	216	230	NA	NA	94	111	NA	NA	94	94	141	141
1550	RUN0445	La Réunion	Mascarenes	REU039	-21.3645	55.72375	2011-12-15	T. François	P0Q	A1	x	A	210	218	100	102	177	181	136	136	133	134	144	162	184	232	106	106	222	232	177	181	107	111	235	249	94	102	133	143
1551	RUN0446	La Réunion	Mascarenes	REU039	-21.3645	55.72375	2011-12-15	T. François	P0Q	A1	x	A	214	218	100	102	181	181	147	149	133	134	128	164	184	184	106	106	218	230	165	169	111	111	233	239	94	104	133	179
1552	RUN0447	La Réunion	Mascarenes	REU039	-21.3645	55.72375	2011-12-15	T. François	P0Q	A1	x	A	210	210	102	102	177	179	149	149	133	134	128	142	184	184	106	110	218	220	165	169	111	111	NA	NA	102	102	NA	NA
1553	RUN0448	La Réunion	Mascarenes	REU039	-21.3645	55.72375	2011-12-15	T. François	P0Q	A1	x	A	210	214	100	100	177	181	137	149	133	134	128	142	184	184	106	106	222	230	169	169	111	111	235	237	94	94	141	167
1554	RUN0449	La Réunion	Mascarenes	REU039	-21.3645	55.72375	2011-12-15	T. François	P0Q	A1	x	A	214	218	100	102	175	181	149	149	134	134	128	128	184	184	106	110	230	230	169	179	110	111	233	239	94	102	NA	NA
1555	RUN0450	La Réunion	Mascarenes	REU039	-21.3645	55.72375	2011-12-15	T. François	P0Q	A1	x	A	210	210	92	102	175	181	136	149	132	133	128	128	184	184	106	110	220	230	177	181	94	111	225	233	94	102	141	181
1556	RUN0451	La Réunion	Mascarenes	REU039	-21.3645	55.72375	2011-12-15	T. François	P0Q	A1	x	A	214	218	96	102	177	179	147	149	134	134	128	128	184	184	106	110	216	216	179	181	NA	NA	NA	NA	NA	NA	NA	NA
1557	RUN0452_2	La Réunion	Mascarenes	REU039	-21.3645	55.72375	2011-12-15	T. François	P0Q	A1	x	A	210	210	102	102	181	181	136	136	133	134	128	164	184	184	106	110	216	230	169	177	92	94	233	239	102	102	177	177
1558	RUN0453	La Réunion	Mascarenes	REU039	-21.3645	55.72375	2011-12-15	T. François	P0Q	A1	x	A	210	210	100	102	175	179	147	149	133	134	126	147	184	184	106	110	216	230	165	169	111	111	233	233	94	94	141	179
1559	RUN0454_2	La Réunion	Mascarenes	REU039	-21.3645	55.72375	2011-12-15	T. François	P0Q	A1	x	A	210	218	102	102	181	181	149	149	132	133	128	128	184	184	110	110	218	230	169	169	92	110	233	239	94	94	141	177
1560	RUN0455	La Réunion	Mascarenes	REU039	-21.3645	55.72375	2011-12-15	T. François	P0Q	A1	x	A	210	228	92	96	175	177	136	149	133	134	128	154	184	184	110	110	230	232	169	177	92	94	233	233	94	102	133	135
1561	RUN0456	La Réunion	Mascarenes	REU039	-21.3645	55.72375	2011-12-15	T. François	P0Q	A1	x	A	210	214	96	96	177	181	147	149	132	134	128	146	184	232	106	110	220	230	169	169	94	110	237	243	94	102	139	177
1562	RUN0457	La Réunion	Mascarenes	REU039	-21.3645	55.72375	2011-12-15	T. François	P0Q	A1	x	A	210	214	96	102	177	181	136	151	132	134	128	162	184	202	106	110	216	230	177	181	NA	NA	NA	NA	NA	NA	NA	NA
1563	RUN0458	La Réunion	Mascarenes	REU039	-21.3645	55.72375	2011-12-15	T. François	P0Q	A1	x	A	214	214	92	102	179	187	147	149	133	134	126	128	184	184	106	110	230	232	179	181	111	111	NA	NA	94	94	143	143
1564	RUN0459	La Réunion	Mascarenes	REU039	-21.3645	55.72375	2011-12-15	T. François	P0Q	A1	x	A	210	214	96	102	177	181	149	149	133	134	128	158	184	232	106	110	220	228	169	179	111	111	NA	NA	94	94	181	181
1565	RUN0460_2	La Réunion	Mascarenes	REU039	-21.3645	55.72375	2011-12-15	T. François	P0Q	A1	x	A	210	214	100	102	181	181	147	149	133	134	128	156	184	206	106	110	216	218	165	169	94	111	233	249	94	94	179	181
1566	RUN0461	La Réunion	Mascarenes	REU039	-21.3645	55.72375	2011-12-15	T. François	P0Q	A1	x	A	210	218	102	102	175	181	147	149	133	133	128	154	184	184	106	110	220	236	177	181	111	111	233	239	94	94	141	183
1567	RUN0462	La Réunion	Mascarenes	REU039	-21.3645	55.72375	2011-12-15	T. François	P0Q	A1	x	A	214	214	100	102	177	179	136	151	133	134	128	154	184	232	110	110	230	230	169	169	107	111	239	239	102	102	135	179
1568	RUN0463	La Réunion	Mascarenes	REU039	-21.3645	55.72375	2011-12-15	T. François	P0Q	A1	x	A	210	210	100	102	177	181	137	140	133	133	128	160	184	184	106	110	222	222	169	181	107	111	237	239	94	94	141	183
1569	RUN0464	La Réunion	Mascarenes	REU039	-21.3645	55.72375	2011-12-15	T. François	P0Q	A1	x	A	210	210	100	102	177	181	137	140	128	133	128	142	184	184	106	110	222	222	169	175	107	111	237	239	94	94	141	183
1570	RUN0466	La Réunion	Mascarenes	REU039	-21.3645	55.72375	2011-12-15	T. François	P0Q	A1	x	A	210	210	92	102	179	181	149	149	128	133	140	156	184	184	110	110	218	232	169	169	94	111	239	243	94	102	141	179
1571	RUN0467	La Réunion	Mascarenes	REU039	-21.3645	55.72375	2011-12-15	T. François	P0Q	A1	x	A	214	214	96	102	177	181	136	149	128	134	128	142	184	184	106	110	230	232	169	175	94	111	225	233	94	94	139	139
1572	RUN0468	La Réunion	Mascarenes	REU039	-21.3645	55.72375	2011-12-15	T. François	P0Q	A1	x	A	210	210	96	102	177	181	147	147	132	134	128	128	184	184	106	106	218	220	169	181	99	111	237	243	94	94	179	181
1573	RUN0469	La Réunion	Mascarenes	REU039	-21.3645	55.72375	2011-12-15	T. François	P0Q	A1	x	A	210	214	102	102	175	181	136	149	128	134	126	128	184	184	110	110	216	230	169	169	110	111	233	245	94	94	141	181
1574	RUN0470	La Réunion	Mascarenes	REU039	-21.3645	55.72375	2011-12-15	T. François	P0Q	A1	x	A	214	214	96	100	181	181	136	149	132	133	128	128	184	184	106	110	216	230	169	179	94	107	233	239	102	104	141	181
1575	RUN0471	La Réunion	Mascarenes	REU039	-21.3645	55.72375	2011-12-15	T. François	P0Q	A1	x	A	210	210	96	102	181	181	140	149	134	134	128	154	184	184	106	106	222	230	169	181	94	111	239	243	102	102	141	181
1576	RUN0472	La Réunion	Mascarenes	REU039	-21.3645	55.72375	2011-12-15	T. François	P0Q	A1	x	A	210	214	96	102	181	181	140	149	133	134	146	158	184	184	106	110	232	232	169	181	94	111	225	241	94	104	129	179
1577	RUN0473	La Réunion	Mascarenes	REU039	-21.3645	55.72375	2011-12-15	T. François	P0Q	A1	x	A	210	214	96	102	181	181	149	149	132	133	128	146	184	184	106	110	232	232	169	181	94	111	225	241	94	102	129	141
1578	RUN0474	La Réunion	Mascarenes	REU039	-21.3645	55.72375	2011-12-15	T. François	P0Q	A1	x	A	210	210	100	102	181	181	147	149	128	133	128	148	184	184	106	110	220	220	169	181	94	107	237	241	102	102	129	139
1579	RUN0475	La Réunion	Mascarenes	REU039	-21.3645	55.72375	2011-12-15	T. François	P0Q	A1	x	A	210	214	96	102	181	181	136	147	134	134	142	160	184	184	106	110	216	220	169	169	94	107	237	247	102	102	171	177
1580	RUN0476	La Réunion	Mascarenes	REU039	-21.3645	55.72375	2011-12-15	T. François	P0Q	A1	x	A	NA	NA	96	102	175	175	136	136	133	133	148	162	184	232	106	110	220	230	169	177	94	111	225	235	102	102	139	141
1581	RUN0477	La Réunion	Mascarenes	REU039	-21.3645	55.72375	2011-12-15	T. François	P0Q	A1	x	A	212	214	96	102	177	181	136	149	132	134	128	128	184	184	106	110	230	230	179	181	94	111	233	239	94	100	139	181
1582	RUN0478	La Réunion	Mascarenes	REU039	-21.3645	55.72375	2011-12-15	T. François	P0Q	A1	x	A	210	214	100	102	175	177	149	149	128	133	142	154	184	184	106	110	216	230	165	169	107	111	235	237	102	102	139	179
1583	RUN0479	La Réunion	Mascarenes	REU039	-21.3645	55.72375	2011-12-15	T. François	P0Q	A1	x	A	210	210	100	102	181	181	136	149	133	134	128	128	184	234	106	110	216	230	169	175	107	119	237	249	94	104	133	179
1584	RUN0480	La Réunion	Mascarenes	REU039	-21.3645	55.72375	2011-12-15	T. François	P0Q	A1	x	A	214	214	96	102	179	181	136	147	133	134	126	156	184	184	106	106	216	222	169	181	94	111	233	235	94	102	139	139
1585	RUN0481	La Réunion	Mascarenes	REU039	-21.3645	55.72375	2011-12-15	T. François	P0Q	A1	x	A	214	214	102	102	179	181	149	149	128	132	128	128	184	232	106	110	230	230	169	169	107	111	235	241	94	102	181	181
1586	RUN0482	La Réunion	Mascarenes	REU039	-21.3645	55.72375	2011-12-15	T. François	P0Q	A1	x	A	210	218	92	98	181	183	147	149	128	133	128	146	184	184	110	110	218	220	NA	NA	111	111	235	241	94	94	133	183
1587	RUN0483	La Réunion	Mascarenes	REU039	-21.3645	55.72375	2011-12-15	T. François	P0Q	A1	x	A	210	214	102	102	181	181	140	149	132	134	128	128	184	232	110	110	216	230	169	177	110	111	233	243	94	100	141	181
1588	RUN0484	La Réunion	Mascarenes	REU039	-21.3645	55.72375	2011-12-15	T. François	P0Q	A1	x	A	210	210	96	102	175	177	149	149	133	134	128	128	184	184	110	110	218	230	165	169	107	111	233	239	94	102	181	183
1589	RUN0485	La Réunion	Mascarenes	REU039	-21.3645	55.72375	2011-12-15	T. François	P0Q	A1	x	A	210	218	100	102	181	181	136	149	134	134	158	160	174	184	106	106	230	230	169	177	92	94	NA	NA	94	100	NA	NA
1590	RUN0486	La Réunion	Mascarenes	REU039	-21.3645	55.72375	2011-12-15	T. François	P0Q	A1	x	A	210	218	102	102	177	177	149	149	132	133	128	158	184	232	106	110	216	220	179	181	94	111	235	239	94	112	181	181
1591	RUN0487	La Réunion	Mascarenes	REU039	-21.3645	55.72375	2011-12-15	T. François	P0Q	A1	x	A	210	214	96	96	177	181	149	149	133	134	128	128	184	184	106	110	222	230	179	179	94	94	237	249	102	102	139	141
1592	RUN0423	La Réunion	Mascarenes	REU039	-21.3645	55.72375	2011-12-15	T. François	Q	C1-C2	C2_d	C	210	210	96	102	179	181	136	149	128	133	128	154	184	234	110	110	216	220	169	169	107	111	233	241	94	112	141	177
1593	RUN0443	La Réunion	Mascarenes	REU039	-21.3645	55.72375	2011-12-15	T. François	Q	C1-C2	C2_a	C	212	228	102	102	177	181	136	149	133	134	128	128	232	232	106	110	222	222	169	179	94	111	233	239	94	102	141	175
1594	RUN0465	La Réunion	Mascarenes	REU039	-21.3645	55.72375	2011-12-15	T. François	Q	C1-C2	x	C	210	226	92	100	177	181	136	151	133	134	144	164	184	202	106	106	218	230	169	177	94	107	239	243	102	102	129	181
1595	RUN0407	La Réunion	Mascarenes	REU040	-21.35465	55.7212	2011-12-14	T. François	P0Q	A1	x	A	NA	NA	NA	NA	NA	NA	147	147	134	134	128	162	184	232	106	110	218	230	NA	NA	111	111	237	237	94	100	NA	NA
1596	RUN0408	La Réunion	Mascarenes	REU040	-21.35465	55.7212	2011-12-14	T. François	P0Q	A1	x	A	210	210	100	102	177	177	140	147	133	134	142	162	184	232	106	110	230	230	169	169	107	111	233	243	94	102	179	181
1597	RUN0409	La Réunion	Mascarenes	REU040	-21.35465	55.7212	2011-12-14	T. François	P0Q	A1	A1_MAD3	A	210	214	100	102	177	181	147	149	132	133	126	156	184	184	106	106	216	222	169	175	111	111	235	239	94	94	181	181
1598	RUN0410	La Réunion	Mascarenes	REU040	-21.35465	55.7212	2011-12-14	T. François	P0Q	A1	x	A	210	218	100	102	181	181	136	149	132	134	128	128	184	184	106	106	222	230	169	169	107	110	235	237	94	102	135	177
1599	RUN0413	La Réunion	Mascarenes	REU040	-21.35465	55.7212	2011-12-14	T. François	P0Q	A1	x	A	214	222	102	102	175	181	149	149	132	134	128	128	184	184	106	110	216	230	169	169	111	111	225	237	94	94	141	183
1600	RUN0411	La Réunion	Mascarenes	REU040	-21.35465	55.7212	2011-12-14	T. François	PQQ	M4	M4_a	M	214	214	96	102	179	181	136	149	133	134	140	160	184	184	106	110	222	228	169	175	111	111	233	239	94	102	141	171
1601	RUN0412	La Réunion	Mascarenes	REU040	-21.35465	55.7212	2011-12-14	T. François	PQQ	M4	M4_a	M	210	212	102	102	175	183	149	149	133	133	128	162	220	234	106	110	230	232	169	169	111	112	233	239	94	104	141	147
1602	RUN0813	La Réunion	Mascarenes	REU041	-21.360683	55.71805	2012-01-18	T. François, P. Turpin	P0Q	A1	x	A	210	218	100	102	181	181	136	136	128	133	128	128	184	184	106	110	216	222	169	181	111	113	233	239	94	102	129	141
1603	RUN0814	La Réunion	Mascarenes	REU041	-21.360683	55.71805	2012-01-18	T. François, P. Turpin	P0Q	A1	x	A	210	218	96	102	181	181	140	147	133	134	143	146	184	234	106	110	212	218	181	183	94	111	237	239	94	102	139	177
1604	RUN0815	La Réunion	Mascarenes	REU041	-21.360683	55.71805	2012-01-18	T. François, P. Turpin	P0Q	A1	x	A	210	214	102	102	175	181	149	149	128	134	128	154	184	184	106	110	216	230	169	177	110	111	235	239	94	102	139	139
1605	RUN0816	La Réunion	Mascarenes	REU041	-21.360683	55.71805	2012-01-18	T. François, P. Turpin	P0Q	A1	x	A	210	214	102	102	177	177	136	149	134	134	128	154	184	184	106	110	214	230	175	181	107	116	233	235	94	102	177	181
1606	RUN0817	La Réunion	Mascarenes	REU041	-21.360683	55.71805	2012-01-18	T. François, P. Turpin	P0Q	A1	x	A	210	222	100	102	177	181	149	149	128	134	128	128	184	238	106	110	216	224	169	179	111	111	237	239	100	100	141	177
1607	RUN0820	La Réunion	Mascarenes	REU041	-21.360683	55.71805	2012-01-18	T. François, P. Turpin	P0Q	A1	x	A	210	214	102	102	175	181	149	149	133	133	128	128	202	206	110	110	216	218	165	181	111	111	233	243	94	102	177	183
1608	RUN0821	La Réunion	Mascarenes	REU041	-21.360683	55.71805	2012-01-18	T. François, P. Turpin	P0Q	A1	x	A	210	214	96	100	177	181	136	149	128	133	NA	NA	184	184	106	110	230	232	169	175	94	94	233	233	102	102	139	177
1609	RUN0822	La Réunion	Mascarenes	REU041	-21.360683	55.71805	2012-01-18	T. François, P. Turpin	P0Q	A1	x	A	210	210	92	96	177	181	136	149	133	134	128	128	184	184	106	106	220	230	169	169	94	111	235	243	94	104	175	177
1610	RUN0823	La Réunion	Mascarenes	REU041	-21.360683	55.71805	2012-01-18	T. François, P. Turpin	P0Q	A1	x	A	210	210	92	102	181	181	147	149	133	134	146	162	184	184	106	110	216	230	169	169	107	111	233	243	94	102	141	147
1611	RUN0824	La Réunion	Mascarenes	REU041	-21.360683	55.71805	2012-01-18	T. François, P. Turpin	P0Q	A1	x	A	210	210	92	96	177	181	136	149	133	134	128	128	184	184	106	106	216	220	169	169	94	111	235	243	94	104	139	175
1612	RUN0825	La Réunion	Mascarenes	REU041	-21.360683	55.71805	2012-01-18	T. François, P. Turpin	P0Q	A1	A1_MAD3	A	210	214	96	102	181	181	136	136	132	134	142	156	184	190	106	110	220	232	169	169	94	117	225	233	94	102	129	139
1613	RUN0826	La Réunion	Mascarenes	REU041	-21.360683	55.71805	2012-01-18	T. François, P. Turpin	P0Q	A1	x	A	210	226	102	102	181	181	136	147	132	134	128	128	184	202	106	110	216	230	169	169	107	111	239	241	94	102	139	177
1614	RUN0827	La Réunion	Mascarenes	REU041	-21.360683	55.71805	2012-01-18	T. François, P. Turpin	P0Q	A1	x	A	210	210	96	102	181	187	149	149	133	134	128	128	184	230	106	110	230	230	169	169	94	111	235	243	102	102	139	177
1615	RUN0828	La Réunion	Mascarenes	REU041	-21.360683	55.71805	2012-01-18	T. François, P. Turpin	P0Q	A1	x	A	212	214	102	102	175	175	136	149	133	133	128	128	184	232	110	110	222	222	169	177	94	111	237	237	94	104	141	141
1616	RUN0829	La Réunion	Mascarenes	REU041	-21.360683	55.71805	2012-01-18	T. François, P. Turpin	P0Q	A1	x	A	210	210	100	102	181	181	136	152	134	134	128	152	184	184	106	110	216	230	169	169	94	111	225	229	94	102	181	181
1617	RUN0830	La Réunion	Mascarenes	REU041	-21.360683	55.71805	2012-01-18	T. François, P. Turpin	P0Q	A1	x	A	210	210	102	102	175	181	147	149	134	134	128	150	184	202	106	106	216	216	169	169	94	107	NA	NA	94	94	NA	NA
1618	RUN0831	La Réunion	Mascarenes	REU041	-21.360683	55.71805	2012-01-18	T. François, P. Turpin	P0Q	A1	x	A	210	214	96	102	177	177	149	149	133	134	148	164	184	184	106	110	222	226	169	169	107	112	233	233	94	102	139	183
1619	RUN0832	La Réunion	Mascarenes	REU041	-21.360683	55.71805	2012-01-18	T. François, P. Turpin	P0Q	A1	x	A	210	214	96	102	177	177	149	149	128	134	148	162	184	220	106	106	224	230	165	169	107	107	233	233	102	102	181	183
1620	RUN0833	La Réunion	Mascarenes	REU041	-21.360683	55.71805	2012-01-18	T. François, P. Turpin	P0Q	A1	x	A	NA	NA	96	102	NA	NA	149	149	132	134	128	142	184	184	110	110	220	232	NA	NA	94	117	233	235	94	102	141	141
1621	RUN0834	La Réunion	Mascarenes	REU041	-21.360683	55.71805	2012-01-18	T. François, P. Turpin	P0Q	A1	x	A	210	214	100	102	175	177	149	149	132	133	142	142	184	184	106	110	230	232	169	169	94	111	233	233	102	102	141	177
1622	RUN0835	La Réunion	Mascarenes	REU041	-21.360683	55.71805	2012-01-18	T. François, P. Turpin	P0Q	A1	x	A	210	210	96	96	177	177	147	149	132	133	128	128	184	184	108	110	224	232	169	175	94	111	235	239	94	94	129	129
1623	RUN0836	La Réunion	Mascarenes	REU041	-21.360683	55.71805	2012-01-18	T. François, P. Turpin	P0Q	A1	x	A	214	226	102	102	175	181	136	147	133	133	128	128	206	232	110	110	218	230	165	169	94	111	237	237	94	104	NA	NA
1624	RUN0837	La Réunion	Mascarenes	REU041	-21.360683	55.71805	2012-01-18	T. François, P. Turpin	P0Q	A1	x	A	210	228	92	100	183	183	136	140	133	134	130	146	184	184	106	108	220	230	169	177	111	111	233	235	102	102	129	181
1625	RUN0838	La Réunion	Mascarenes	REU041	-21.360683	55.71805	2012-01-18	T. François, P. Turpin	P0Q	A1	x	A	210	220	100	102	175	181	149	149	133	134	128	128	184	184	106	110	230	230	169	181	113	116	233	233	100	100	181	181
1626	RUN0839	La Réunion	Mascarenes	REU041	-21.360683	55.71805	2012-01-18	T. François, P. Turpin	P0Q	A1	x	A	210	210	96	102	175	181	136	149	133	134	128	128	184	202	106	110	230	232	169	169	107	111	237	239	102	102	141	181
1627	RUN0840	La Réunion	Mascarenes	REU041	-21.360683	55.71805	2012-01-18	T. François, P. Turpin	P0Q	A1	x	A	210	214	102	102	177	181	136	149	132	134	128	128	184	184	106	110	216	218	169	169	92	94	239	239	102	102	177	181
1628	RUN0841	La Réunion	Mascarenes	REU041	-21.360683	55.71805	2012-01-18	T. François, P. Turpin	P0Q	A1	x	A	214	226	100	100	181	181	149	149	133	134	128	148	184	212	106	110	230	232	169	177	111	111	233	249	102	104	129	139
1629	RUN0842	La Réunion	Mascarenes	REU041	-21.360683	55.71805	2012-01-18	T. François, P. Turpin	P0Q	A1	x	A	210	210	96	102	175	177	136	151	134	134	128	128	184	202	110	110	218	234	177	183	94	107	225	225	104	104	133	181
1630	RUN0843	La Réunion	Mascarenes	REU041	-21.360683	55.71805	2012-01-18	T. François, P. Turpin	P0Q	A1	x	A	210	210	96	102	177	181	147	149	133	133	128	128	184	184	106	110	230	230	165	169	111	111	NA	NA	NA	NA	NA	NA
1631	RUN0844	La Réunion	Mascarenes	REU041	-21.360683	55.71805	2012-01-18	T. François, P. Turpin	P0Q	A1	x	A	210	210	102	104	177	181	149	149	134	134	128	128	184	212	106	110	216	216	169	169	111	111	239	239	94	100	141	141
1632	RUN0845	La Réunion	Mascarenes	REU041	-21.360683	55.71805	2012-01-18	T. François, P. Turpin	P0Q	A1	x	A	210	210	96	96	175	181	140	147	133	134	128	128	184	184	106	110	218	218	175	183	94	94	237	243	94	104	139	177
1633	RUN0846	La Réunion	Mascarenes	REU041	-21.360683	55.71805	2012-01-18	T. François, P. Turpin	P0Q	A1	x	A	210	210	100	102	181	181	136	149	133	134	128	152	184	184	110	110	216	230	169	169	94	107	233	233	94	94	141	177
1634	RUN0847	La Réunion	Mascarenes	REU041	-21.360683	55.71805	2012-01-18	T. François, P. Turpin	P0Q	A1	x	A	210	214	96	100	181	181	140	147	133	134	128	154	184	184	106	110	222	232	169	177	107	107	233	239	102	102	141	141
1635	RUN0848	La Réunion	Mascarenes	REU041	-21.360683	55.71805	2012-01-18	T. François, P. Turpin	P0Q	A1	x	A	210	212	92	100	179	181	149	149	133	134	128	148	184	184	106	106	222	232	175	177	111	111	235	237	94	100	129	141
1636	RUN0849_2	La Réunion	Mascarenes	REU041	-21.360683	55.71805	2012-01-18	T. François, P. Turpin	P0Q	A1	x	A	210	210	92	102	177	177	136	149	133	133	128	128	184	184	110	110	214	216	169	169	107	111	233	239	94	102	141	141
1637	RUN0818	La Réunion	Mascarenes	REU041	-21.360683	55.71805	2012-01-18	T. François, P. Turpin	Q	C1-C2	C2_a	C	210	218	96	100	177	181	136	149	128	132	128	148	184	202	106	110	218	230	175	181	107	111	233	247	94	102	129	179
1638	RUN0819_2	La Réunion	Mascarenes	REU041	-21.360683	55.71805	2012-01-18	T. François, P. Turpin	Q	C1-C2	x	C	210	218	NA	NA	NA	NA	136	136	128	134	128	128	220	234	106	110	218	222	177	181	110	111	233	247	94	102	129	181
1639	RUN0488	La Réunion	Mascarenes	REU042	-21.354433	55.708083	2011-12-15	T. François	P0Q	A1	x	A	210	222	96	100	181	187	149	149	133	134	128	128	184	206	106	110	230	230	165	177	110	111	237	239	94	94	141	143
1640	RUN0489	La Réunion	Mascarenes	REU042	-21.354433	55.708083	2011-12-15	T. François	P0Q	A1	x	A	210	214	102	102	181	181	136	147	132	133	128	128	184	184	110	110	216	220	169	169	92	94	235	235	94	104	139	177
1641	RUN0490	La Réunion	Mascarenes	REU042	-21.354433	55.708083	2011-12-15	T. François	P0Q	A1	x	A	212	232	100	102	181	181	140	149	133	134	128	140	184	220	106	110	216	220	169	179	111	113	233	239	102	102	139	141
1642	RUN0491	La Réunion	Mascarenes	REU042	-21.354433	55.708083	2011-12-15	T. François	P0Q	A1	x	A	210	214	102	102	175	181	136	147	132	133	128	128	184	184	106	110	216	220	169	169	92	107	225	235	94	104	139	177
1643	RUN0492	La Réunion	Mascarenes	REU042	-21.354433	55.708083	2011-12-15	T. François	P0Q	A1	x	A	210	214	92	102	181	191	149	149	134	134	146	148	184	184	106	106	230	230	165	169	111	116	225	237	94	102	181	181
1644	RUN0493	La Réunion	Mascarenes	REU042	-21.354433	55.708083	2011-12-15	T. François	P0Q	A1	x	A	210	210	100	102	175	177	149	149	133	133	128	128	184	184	106	106	220	230	169	169	107	117	237	243	94	94	133	177
1645	RUN0494	La Réunion	Mascarenes	REU042	-21.354433	55.708083	2011-12-15	T. François	P0Q	A1	x	A	210	214	100	102	175	181	136	147	132	134	128	146	184	232	106	110	216	222	169	179	107	111	237	239	102	102	137	139
1646	RUN0495	La Réunion	Mascarenes	REU042	-21.354433	55.708083	2011-12-15	T. François	P0Q	A1	A1_MAD3	A	214	214	102	102	175	183	136	147	133	133	128	158	184	206	106	106	218	220	165	175	94	94	237	243	94	94	141	183
1647	RUN0496	La Réunion	Mascarenes	REU042	-21.354433	55.708083	2011-12-15	T. François	P0Q	A1	x	A	210	232	92	96	181	181	136	149	134	134	128	140	184	184	106	110	230	232	169	179	94	110	239	249	94	94	141	181
1648	RUN0497	La Réunion	Mascarenes	REU042	-21.354433	55.708083	2011-12-15	T. François	P0Q	A1	x	A	210	218	96	102	177	181	149	149	128	134	128	154	184	184	106	106	218	230	169	179	111	111	237	239	102	102	139	139
1649	RUN0498	La Réunion	Mascarenes	REU042	-21.354433	55.708083	2011-12-15	T. François	P0Q	A1	x	A	214	214	102	102	175	181	149	151	134	134	128	128	184	206	110	110	216	220	169	169	111	117	233	237	102	104	141	181
1650	RUN0499	La Réunion	Mascarenes	REU042	-21.354433	55.708083	2011-12-15	T. François	P0Q	A1	x	A	210	210	102	102	177	181	149	149	134	134	142	158	184	212	106	110	216	230	177	181	110	111	239	239	102	102	181	183
1651	RUN0500	La Réunion	Mascarenes	REU042	-21.354433	55.708083	2011-12-15	T. François	P0Q	A1	x	A	210	218	100	104	177	177	147	149	134	134	128	154	184	184	106	106	216	220	169	169	94	107	233	237	94	102	143	177
1652	RUN0501	La Réunion	Mascarenes	REU042	-21.354433	55.708083	2011-12-15	T. François	P0Q	A1	x	A	210	214	96	100	181	181	136	136	132	134	128	128	184	232	106	110	220	220	169	169	94	111	237	237	94	100	141	177
1653	RUN0502	La Réunion	Mascarenes	REU042	-21.354433	55.708083	2011-12-15	T. François	P0Q	A1	x	A	214	214	102	102	181	181	140	151	133	134	162	164	184	234	106	110	216	230	169	177	94	107	233	237	94	102	129	179
1654	RUN0503	La Réunion	Mascarenes	REU042	-21.354433	55.708083	2011-12-15	T. François	P0Q	A1	x	A	210	214	96	102	179	181	147	149	132	134	NA	NA	184	184	NA	NA	222	222	177	179	94	94	233	239	94	102	141	167
1655	RUN0504	La Réunion	Mascarenes	REU042	-21.354433	55.708083	2011-12-15	T. François	P0Q	A1	x	A	210	226	102	102	175	181	140	149	134	134	144	154	184	200	106	110	230	236	169	181	111	119	233	249	94	94	139	181
1656	RUN0505	La Réunion	Mascarenes	REU042	-21.354433	55.708083	2011-12-15	T. François	P0Q	A1	x	A	214	218	102	102	181	183	136	149	134	134	148	158	184	212	106	110	216	220	169	175	94	107	237	239	102	102	141	177
1657	RUN0506	La Réunion	Mascarenes	REU042	-21.354433	55.708083	2011-12-15	T. François	P0Q	A1	x	A	210	210	100	102	177	181	149	149	128	133	140	164	184	234	106	110	216	232	169	181	107	111	235	243	94	102	133	139
1658	RUN0507	La Réunion	Mascarenes	REU042	-21.354433	55.708083	2011-12-15	T. François	P0Q	A1	x	A	214	218	92	102	181	181	149	149	132	133	144	148	184	184	106	110	218	230	169	169	92	116	233	249	94	102	133	181
1659	RUN0508	La Réunion	Mascarenes	REU042	-21.354433	55.708083	2011-12-15	T. François	P0Q	A1	x	A	210	222	96	102	181	181	136	147	132	133	126	148	184	184	106	110	216	230	181	181	92	92	235	241	102	104	141	183
1660	RUN0509	La Réunion	Mascarenes	REU042	-21.354433	55.708083	2011-12-15	T. François	P0Q	A1	x	A	214	218	102	102	177	181	136	149	132	134	128	148	212	232	106	106	216	230	169	169	94	107	239	239	102	102	139	181
1661	RUN0510	La Réunion	Mascarenes	REU042	-21.354433	55.708083	2011-12-15	T. François	P0Q	A1	x	A	210	210	96	100	177	181	147	149	132	134	128	148	184	232	106	110	220	230	169	169	110	111	233	237	94	102	141	181
1662	RUN0511	La Réunion	Mascarenes	REU042	-21.354433	55.708083	2011-12-15	T. François	P0Q	A1	x	A	212	218	96	102	177	181	136	149	133	134	128	156	184	184	110	110	222	230	169	177	94	107	235	247	102	102	133	141
1663	RUN0512	La Réunion	Mascarenes	REU042	-21.354433	55.708083	2011-12-15	T. François	P0Q	A1	x	A	214	216	102	102	179	181	136	136	133	134	142	144	184	184	106	106	230	230	169	169	94	111	239	243	100	102	143	179
1664	RUN0513	La Réunion	Mascarenes	REU042	-21.354433	55.708083	2011-12-15	T. François	P0Q	A1	x	A	210	218	102	102	177	181	136	140	132	134	128	142	184	232	106	108	230	232	169	169	107	111	239	239	102	102	141	175
1665	RUN0514	La Réunion	Mascarenes	REU042	-21.354433	55.708083	2011-12-15	T. François	P0Q	A1	x	A	210	218	96	102	175	187	136	149	133	134	128	128	184	232	110	110	216	230	181	181	94	94	233	239	94	102	129	181
1666	RUN0515	La Réunion	Mascarenes	REU042	-21.354433	55.708083	2011-12-15	T. François	P0Q	A1	x	A	210	214	100	102	177	181	147	151	134	134	126	154	184	234	106	110	220	240	169	177	94	94	239	239	94	102	179	181
1667	RUN0516	La Réunion	Mascarenes	REU042	-21.354433	55.708083	2011-12-15	T. François	P0Q	A1	x	A	210	210	96	100	175	179	149	149	134	134	128	128	184	184	106	110	216	230	169	169	94	107	233	239	94	94	139	141
1668	RUN0517	La Réunion	Mascarenes	REU042	-21.354433	55.708083	2011-12-15	T. François	P0Q	A1	x	A	NA	NA	96	100	179	181	147	149	134	134	128	128	184	206	110	110	216	230	169	169	92	94	233	235	94	94	139	183
1669	RUN0518	La Réunion	Mascarenes	REU042	-21.354433	55.708083	2011-12-15	T. François	P0Q	A1	x	A	214	218	92	102	177	177	136	149	132	133	128	128	220	220	106	110	230	230	169	181	94	107	233	235	94	102	177	181
1670	RUN0519	La Réunion	Mascarenes	REU042	-21.354433	55.708083	2011-12-15	T. François	P0Q	A1	x	A	210	226	102	102	175	181	147	149	132	134	128	128	184	232	110	110	226	230	169	169	94	111	225	233	94	102	129	139
1671	RUN0520	La Réunion	Mascarenes	REU042	-21.354433	55.708083	2011-12-15	T. François	P0Q	A1	x	A	214	218	100	102	181	183	147	152	132	133	128	162	184	232	110	110	218	230	169	169	107	111	237	243	94	94	181	181
1672	RUN0521	La Réunion	Mascarenes	REU042	-21.354433	55.708083	2011-12-15	T. François	P0Q	A1	x	A	212	218	100	102	181	181	147	149	132	133	128	145	184	232	106	106	220	236	169	169	111	123	233	245	102	102	139	141
1673	RUN0522	La Réunion	Mascarenes	REU042	-21.354433	55.708083	2011-12-15	T. François	P0Q	A1	x	A	210	212	92	96	177	177	136	147	133	134	128	162	184	232	110	110	216	232	169	181	107	117	239	249	102	102	133	143
1674	RUN0523	La Réunion	Mascarenes	REU042	-21.354433	55.708083	2011-12-15	T. François	P0Q	A1	x	A	214	214	102	102	177	181	136	149	133	134	128	128	184	184	106	110	232	232	175	181	94	111	233	241	94	94	139	177
1675	RUN0524	La Réunion	Mascarenes	REU042	-21.354433	55.708083	2011-12-15	T. François	P0Q	A1	x	A	210	210	96	100	181	187	147	149	133	134	128	160	184	184	110	110	218	232	169	169	92	94	233	249	94	104	141	181
1676	RUN0525	La Réunion	Mascarenes	REU042	-21.354433	55.708083	2011-12-15	T. François	P0Q	A1	x	A	218	232	96	96	181	187	136	149	133	134	128	128	184	202	110	110	230	232	165	169	94	110	225	249	94	102	139	141
1677	RUN0526	La Réunion	Mascarenes	REU042	-21.354433	55.708083	2011-12-15	T. François	P0Q	A1	x	A	210	214	96	102	179	181	136	149	132	134	128	154	184	184	106	110	222	230	177	181	94	116	225	241	94	102	139	181
1678	RUN0527	La Réunion	Mascarenes	REU042	-21.354433	55.708083	2011-12-15	T. François	P0Q	A1	x	A	214	218	96	96	177	181	136	147	132	133	126	128	184	184	106	110	230	230	169	179	107	117	229	249	94	102	141	143
1679	RUN0528	La Réunion	Mascarenes	REU042	-21.354433	55.708083	2011-12-15	T. François	P0Q	A1	x	A	214	214	102	102	181	191	149	149	132	133	128	128	184	232	106	106	224	230	169	169	92	94	237	237	94	102	129	177
1680	RUN0529	La Réunion	Mascarenes	REU042	-21.354433	55.708083	2011-12-15	T. François	P0Q	A1	x	A	210	216	96	102	181	181	147	149	132	133	144	146	184	206	106	110	230	236	169	179	111	111	233	239	94	100	139	181
1681	RUN0530	La Réunion	Mascarenes	REU042	-21.354433	55.708083	2011-12-15	T. François	P0Q	A1	x	A	210	226	96	100	181	181	136	149	132	134	128	146	184	206	110	110	220	222	169	177	94	94	225	237	94	94	141	181
1682	RUN0531	La Réunion	Mascarenes	REU042	-21.354433	55.708083	2011-12-15	T. François	P0Q	A1	x	A	210	214	96	102	175	181	149	149	133	134	128	128	184	184	106	110	216	230	169	169	94	94	237	249	94	94	139	181
1683	RUN0532	La Réunion	Mascarenes	REU042	-21.354433	55.708083	2011-12-15	T. François	P0Q	A1	x	A	210	214	96	102	181	187	140	147	133	134	126	148	184	222	110	110	230	232	179	181	107	111	239	249	94	94	141	181
1684	RUN0533	La Réunion	Mascarenes	REU042	-21.354433	55.708083	2011-12-15	T. François	P0Q	A1	x	A	214	214	96	102	181	181	136	149	133	133	140	146	184	206	108	110	216	220	165	181	94	111	235	239	102	102	141	181
1685	RUN0534	La Réunion	Mascarenes	REU042	-21.354433	55.708083	2011-12-15	T. François	P0Q	A1	x	A	210	214	100	102	175	177	136	149	134	134	128	142	184	234	106	110	216	230	169	169	94	116	237	241	102	102	181	181
1686	RUN0535	La Réunion	Mascarenes	REU042	-21.354433	55.708083	2011-12-15	T. François	P0Q	A1	A1_MAD3	A	210	210	102	102	177	181	147	149	132	133	128	158	184	232	106	110	216	222	179	181	111	116	235	237	94	102	141	181
1687	RUN0537	La Réunion	Mascarenes	REU042	-21.354433	55.708083	2011-12-15	T. François	P0Q	A1	x	A	210	214	96	102	181	181	136	147	132	134	146	148	184	232	106	110	216	230	169	183	94	107	235	239	94	102	141	175
1688	RUN0538	La Réunion	Mascarenes	REU042	-21.354433	55.708083	2011-12-15	T. François	P0Q	A1	x	A	218	226	100	102	179	181	149	151	128	133	128	128	184	184	110	110	216	230	169	169	94	110	235	239	94	102	179	181
1689	RUN0539	La Réunion	Mascarenes	REU042	-21.354433	55.708083	2011-12-15	T. François	P0Q	A1	x	A	210	210	92	102	177	181	147	147	132	133	128	158	184	184	106	110	220	236	169	169	94	107	225	233	94	94	139	181
1690	RUN0540	La Réunion	Mascarenes	REU042	-21.354433	55.708083	2011-12-15	T. François	P0Q	A1	A1_MAD3	A	210	226	96	102	177	181	136	145	132	132	128	142	184	184	106	110	220	232	165	181	99	111	235	237	100	102	133	181
1691	RUN0541	La Réunion	Mascarenes	REU042	-21.354433	55.708083	2011-12-15	T. François	P0Q	A1	x	A	210	210	96	102	177	181	149	149	130	132	140	162	184	220	106	110	230	232	179	181	94	111	233	247	104	104	143	181
1692	RUN0542	La Réunion	Mascarenes	REU042	-21.354433	55.708083	2011-12-15	T. François	P0Q	A1	x	A	210	210	100	102	177	177	136	147	134	134	128	142	184	184	106	110	218	220	169	169	107	111	233	233	94	102	141	179
1693	RUN0543	La Réunion	Mascarenes	REU042	-21.354433	55.708083	2011-12-15	T. François	P0Q	A1	x	A	210	216	96	102	175	181	149	149	128	134	128	162	184	232	106	110	220	222	169	169	107	117	235	235	102	102	141	181
1694	RUN1071	La Réunion	Mascarenes	REU043	-21.363733	55.706467	2012-01-26	T. François	P0Q	A1	x	A	210	210	102	102	177	181	140	149	134	134	128	148	184	184	106	110	220	232	177	181	111	111	237	249	94	104	129	139
1695	RUN1072	La Réunion	Mascarenes	REU043	-21.363733	55.706467	2012-01-26	T. François	P0Q	A1	x	A	210	214	100	102	177	177	136	149	128	134	148	154	184	184	110	110	218	230	169	177	111	116	225	225	94	102	137	181
1696	RUN1074	La Réunion	Mascarenes	REU043	-21.363733	55.706467	2012-01-26	T. François	P0Q	A1	x	A	214	226	102	102	177	181	149	151	133	134	128	140	184	232	106	110	230	230	165	169	94	94	237	241	102	102	181	183
1697	RUN1075	La Réunion	Mascarenes	REU043	-21.363733	55.706467	2012-01-26	T. François	P0Q	A1	A1_MAD3	A	210	218	100	100	181	181	136	147	128	134	146	152	184	232	106	106	230	232	177	181	107	111	233	239	94	102	129	141
1698	RUN1076	La Réunion	Mascarenes	REU043	-21.363733	55.706467	2012-01-26	T. François	P0Q	A1	x	A	214	214	96	100	175	181	149	149	133	133	128	142	184	184	106	110	216	230	169	169	94	111	237	243	94	94	129	181
1699	RUN1077	La Réunion	Mascarenes	REU043	-21.363733	55.706467	2012-01-26	T. François	P0Q	A1	x	A	210	210	102	102	177	181	136	147	134	134	128	130	184	184	106	110	218	220	177	181	94	111	233	239	94	94	141	177
1700	RUN1078	La Réunion	Mascarenes	REU043	-21.363733	55.706467	2012-01-26	T. François	P0Q	A1	x	A	210	214	92	102	175	181	136	149	133	134	128	128	184	202	106	110	218	222	169	169	107	119	243	249	94	102	139	177
1701	RUN1080	La Réunion	Mascarenes	REU043	-21.363733	55.706467	2012-01-26	T. François	P0Q	A1	x	A	210	214	100	102	181	181	140	149	132	133	128	142	184	220	106	106	222	222	169	181	94	94	237	239	102	102	141	181
1702	RUN1081	La Réunion	Mascarenes	REU043	-21.363733	55.706467	2012-01-26	T. François	P0Q	A1	x	A	212	218	100	102	177	181	136	149	132	134	128	144	184	232	106	106	216	220	169	169	111	111	233	245	94	94	181	181
1703	RUN1082	La Réunion	Mascarenes	REU043	-21.363733	55.706467	2012-01-26	T. François	P0Q	A1	x	A	210	218	100	102	177	181	136	149	132	134	128	128	184	184	106	106	230	230	169	179	107	111	233	249	94	102	141	183
1704	RUN1083	La Réunion	Mascarenes	REU043	-21.363733	55.706467	2012-01-26	T. François	P0Q	A1	x	A	210	214	96	102	177	181	136	136	134	134	NA	NA	184	184	106	106	218	232	165	181	107	107	225	233	94	94	129	181
1705	RUN1085	La Réunion	Mascarenes	REU043	-21.363733	55.706467	2012-01-26	T. François	P0Q	A1	x	A	210	214	92	96	175	181	136	149	134	134	128	146	184	232	106	110	220	230	169	181	94	111	237	239	94	102	139	141
1706	RUN1086	La Réunion	Mascarenes	REU043	-21.363733	55.706467	2012-01-26	T. François	P0Q	A1	x	A	210	210	100	100	175	177	136	136	128	134	144	162	184	232	106	110	216	230	169	175	107	107	235	243	100	102	141	181
1707	RUN1087	La Réunion	Mascarenes	REU043	-21.363733	55.706467	2012-01-26	T. François	P0Q	A1	x	A	210	210	96	100	175	181	147	149	132	132	128	154	184	220	106	110	222	222	169	177	111	116	233	237	94	102	129	141
1708	RUN1089	La Réunion	Mascarenes	REU043	-21.363733	55.706467	2012-01-26	T. François	P0Q	A1	x	A	214	214	102	104	175	177	140	149	132	133	128	128	232	232	106	106	218	230	169	181	111	111	233	237	94	102	181	181
1709	RUN1090	La Réunion	Mascarenes	REU043	-21.363733	55.706467	2012-01-26	T. François	P0Q	A1	x	A	210	210	100	102	177	179	136	137	132	133	140	142	184	184	110	110	216	230	169	175	107	111	243	249	94	102	129	177
1710	RUN1092	La Réunion	Mascarenes	REU043	-21.363733	55.706467	2012-01-26	T. François	P0Q	A1	x	A	210	226	96	102	175	181	149	149	133	134	128	128	184	184	110	110	216	220	179	181	94	107	239	239	102	104	129	183
1711	RUN1093	La Réunion	Mascarenes	REU043	-21.363733	55.706467	2012-01-26	T. François	P0Q	A1	x	A	210	222	96	102	177	177	147	149	132	134	146	160	184	184	108	110	230	232	165	169	94	111	233	237	100	102	141	163
1712	RUN1094	La Réunion	Mascarenes	REU043	-21.363733	55.706467	2012-01-26	T. François	P0Q	A1	x	A	214	218	96	102	181	191	149	149	133	134	128	128	184	184	106	110	222	236	165	183	111	111	235	235	94	104	135	179
1713	RUN1095	La Réunion	Mascarenes	REU043	-21.363733	55.706467	2012-01-26	T. François	P0Q	A1	x	A	210	214	102	102	177	181	147	149	132	133	128	164	184	234	106	110	216	226	169	169	107	111	233	239	102	102	179	181
1714	RUN1096	La Réunion	Mascarenes	REU043	-21.363733	55.706467	2012-01-26	T. François	P0Q	A1	x	A	214	214	102	102	175	181	149	149	132	133	128	128	184	184	110	110	222	230	169	179	92	111	235	239	94	102	129	183
1715	RUN1097	La Réunion	Mascarenes	REU043	-21.363733	55.706467	2012-01-26	T. François	P0Q	A1	x	A	210	214	96	102	177	181	136	149	134	134	128	144	184	202	106	110	216	230	169	179	107	111	233	239	102	102	139	147
1716	RUN1098	La Réunion	Mascarenes	REU043	-21.363733	55.706467	2012-01-26	T. François	P0Q	A1	x	A	214	214	100	102	175	181	147	149	133	134	128	128	184	184	106	106	218	220	175	177	94	111	239	239	94	102	139	181
1717	RUN1099	La Réunion	Mascarenes	REU043	-21.363733	55.706467	2012-01-26	T. François	P0Q	A1	x	A	210	218	96	96	181	181	147	149	133	133	128	162	184	184	106	110	216	216	169	169	107	116	233	233	94	102	149	177
1718	RUN1101	La Réunion	Mascarenes	REU043	-21.363733	55.706467	2012-01-26	T. François	P0Q	A1	x	A	210	218	96	100	181	181	149	149	134	134	128	154	184	184	110	110	230	230	169	181	111	111	233	243	94	102	139	141
1719	RUN1102	La Réunion	Mascarenes	REU043	-21.363733	55.706467	2012-01-26	T. François	P0Q	A1	x	A	210	210	102	102	177	181	147	149	133	134	142	142	184	184	110	112	230	230	169	175	94	111	235	243	102	102	141	177
1720	RUN1103	La Réunion	Mascarenes	REU043	-21.363733	55.706467	2012-01-26	T. François	P0Q	A1	x	A	210	210	96	100	181	183	136	149	132	132	128	146	184	228	106	106	230	230	169	175	111	111	239	259	102	102	141	175
1721	RUN1107	La Réunion	Mascarenes	REU043	-21.363733	55.706467	2012-01-26	T. François	P0Q	A1	x	A	210	210	100	102	175	177	149	149	134	134	128	128	184	184	106	106	230	230	165	169	111	111	235	235	94	102	129	181
1722	RUN1108	La Réunion	Mascarenes	REU043	-21.363733	55.706467	2012-01-26	T. François	P0Q	A1	x	A	214	214	96	102	181	181	136	147	134	134	128	128	184	184	106	110	222	230	169	181	92	94	233	233	102	104	149	181
1723	RUN1109	La Réunion	Mascarenes	REU043	-21.363733	55.706467	2012-01-26	T. François	P0Q	A1	A1_MAD3	A	210	214	100	102	177	181	149	149	134	134	128	128	184	184	106	110	216	230	169	169	94	111	233	233	94	100	141	181
1724	RUN1110	La Réunion	Mascarenes	REU043	-21.363733	55.706467	2012-01-26	T. François	P0Q	A1	x	A	210	212	96	100	177	181	137	149	128	133	126	148	184	184	106	110	218	228	169	177	107	111	237	241	94	100	139	141
1725	RUN1111	La Réunion	Mascarenes	REU043	-21.363733	55.706467	2012-01-26	T. François	P0Q	A1	x	A	212	214	96	100	175	181	140	147	133	134	128	166	184	202	106	106	220	232	165	175	94	111	233	237	100	102	141	141
1726	RUN1112	La Réunion	Mascarenes	REU043	-21.363733	55.706467	2012-01-26	T. François	P0Q	A1	x	A	212	212	100	102	175	175	136	140	132	134	128	131	184	184	106	110	220	230	165	165	110	111	237	239	102	102	141	181
1727	RUN1114	La Réunion	Mascarenes	REU043	-21.363733	55.706467	2012-01-26	T. François	P0Q	A1	x	A	214	226	102	102	181	181	136	149	134	134	128	162	184	232	110	110	230	232	169	177	94	107	233	237	94	100	139	177
1728	RUN1115	La Réunion	Mascarenes	REU043	-21.363733	55.706467	2012-01-26	T. François	P0Q	A1	x	A	210	210	102	102	177	177	147	149	134	134	148	154	184	232	110	110	230	240	169	177	111	111	225	237	94	102	141	181
1729	RUN1116	La Réunion	Mascarenes	REU043	-21.363733	55.706467	2012-01-26	T. François	P0Q	A1	x	A	210	214	100	102	181	181	136	149	134	134	128	140	184	220	110	110	216	230	169	169	94	111	235	243	94	102	141	141
1730	RUN1117	La Réunion	Mascarenes	REU043	-21.363733	55.706467	2012-01-26	T. François	P0Q	A1	x	A	210	216	92	100	179	187	147	149	132	134	144	162	174	184	106	106	230	232	169	175	94	107	233	235	94	102	177	181
1731	RUN1118	La Réunion	Mascarenes	REU043	-21.363733	55.706467	2012-01-26	T. François	P0Q	A1	x	A	212	214	100	102	179	181	147	149	134	134	128	128	184	184	106	110	230	230	169	175	92	111	233	233	102	102	139	177
1732	RUN1121	La Réunion	Mascarenes	REU043	-21.363733	55.706467	2012-01-26	T. François	P0Q	A1	x	A	210	226	100	102	175	181	136	149	134	134	128	128	184	184	106	106	230	230	169	169	111	119	235	235	94	102	129	149
1733	RUN1073	La Réunion	Mascarenes	REU043	-21.363733	55.706467	2012-01-26	T. François	Q	C1-C2	C2_a	C	210	212	102	102	175	175	136	147	132	133	128	142	184	202	106	110	216	230	169	169	107	111	233	235	102	102	141	141
1734	RUN1079	La Réunion	Mascarenes	REU043	-21.363733	55.706467	2012-01-26	T. François	Q	C1-C2	C2_a	C	210	214	92	96	177	181	136	136	128	134	128	128	184	184	110	110	230	230	169	169	92	113	233	235	94	102	139	149
1735	RUN1084	La Réunion	Mascarenes	REU043	-21.363733	55.706467	2012-01-26	T. François	Q	C1-C2	C2_a	C	210	210	96	102	177	179	136	151	132	133	128	154	184	232	106	110	216	216	181	181	94	110	233	247	94	102	127	177
1736	RUN1091	La Réunion	Mascarenes	REU043	-21.363733	55.706467	2012-01-26	T. François	Q	C1-C2	C2_c	C	210	212	96	102	175	181	136	149	133	134	146	146	184	184	110	110	230	236	169	169	94	107	225	237	102	102	179	181
1737	RUN1104	La Réunion	Mascarenes	REU043	-21.363733	55.706467	2012-01-26	T. François	Q	C1-C2	x	C	214	228	100	102	175	181	149	149	134	134	128	128	184	184	106	106	230	230	169	181	107	111	233	235	102	104	175	183
1738	RUN1105	La Réunion	Mascarenes	REU043	-21.363733	55.706467	2012-01-26	T. François	Q	C1-C2	C2_c	C	210	226	102	102	175	179	136	149	133	134	128	146	184	184	106	110	216	232	169	169	110	111	237	241	94	104	179	181
1739	RUN1106	La Réunion	Mascarenes	REU043	-21.363733	55.706467	2012-01-26	T. François	Q	C1-C2	x	C	222	226	102	102	179	181	136	149	133	133	128	154	184	232	106	106	232	232	169	169	107	107	233	239	94	102	177	179
1740	RUN1113	La Réunion	Mascarenes	REU043	-21.363733	55.706467	2012-01-26	T. François	Q	C1-C2	C2_a	C	210	218	96	102	177	181	136	151	134	134	128	131	184	232	106	110	216	232	177	179	111	113	233	243	94	102	141	181
1741	RUN1119	La Réunion	Mascarenes	REU043	-21.363733	55.706467	2012-01-26	T. François	Q	C1-C2	C2_a	C	210	210	100	102	181	207	136	149	134	134	128	148	184	184	106	110	218	230	169	175	110	111	233	239	94	102	137	141
1742	RUN1120	La Réunion	Mascarenes	REU043	-21.363733	55.706467	2012-01-26	T. François	Q	C1-C2	C2_a	C	214	218	96	96	181	181	149	149	133	133	128	158	184	184	110	110	216	230	169	183	107	113	235	235	94	94	127	139
1743	RUN1122	La Réunion	Mascarenes	REU043	-21.363733	55.706467	2012-01-26	T. François	Q	C1-C2	C2_a	C	210	210	100	102	177	181	136	149	132	134	146	148	184	184	106	110	218	222	175	181	111	116	239	239	102	102	137	177
1744	RUN1676	La Réunion	Mascarenes	REU044	-21.362760	55.702143	2012-04-25	Beekeeper	P0Q	A1	x	A	210	210	102	102	181	181	136	149	133	134	132	146	184	184	110	110	218	226	177	179	111	111	233	233	94	102	177	181
1745	RUN1677	La Réunion	Mascarenes	REU044	-21.362760	55.702143	2012-04-25	Beekeeper	P0Q	A1	x	A	210	210	92	100	181	181	149	149	133	134	156	160	184	184	106	106	216	230	169	169	111	112	233	239	94	102	139	177
1746	RUN1678	La Réunion	Mascarenes	REU044	-21.362760	55.702143	2012-04-25	Beekeeper	P0Q	A1	x	A	210	214	100	102	175	181	147	149	132	134	146	162	174	184	110	110	216	216	169	169	111	111	233	237	94	102	179	181
1747	RUN0931	La Réunion	Mascarenes	REU045	-21.3428833	55.6784500	2012-01-20	T. François, P. Turpin	P0Q	A1	x	A	214	228	96	102	175	185	147	149	133	134	144	164	184	184	106	110	216	220	175	179	111	111	233	237	94	102	141	181
1748	RUN0932	La Réunion	Mascarenes	REU045	-21.3428833	55.6784500	2012-01-20	T. François, P. Turpin	P0Q	A1	x	A	210	210	102	102	175	183	147	149	132	134	128	130	184	236	106	110	230	230	169	179	94	111	237	239	94	94	129	133
1749	RUN0933_2	La Réunion	Mascarenes	REU045	-21.3428833	55.6784500	2012-01-20	T. François, P. Turpin	P0Q	A1	x	A	210	214	96	96	177	181	136	149	133	134	128	164	184	234	106	106	216	230	165	169	94	111	231	249	94	102	141	181
1750	RUN0934	La Réunion	Mascarenes	REU045	-21.3428833	55.6784500	2012-01-20	T. François, P. Turpin	P0Q	A1	x	A	210	214	96	100	177	181	147	147	133	134	128	146	184	230	106	106	220	230	165	181	111	111	237	237	94	94	141	141
1751	RUN0935	La Réunion	Mascarenes	REU045	-21.3428833	55.6784500	2012-01-20	T. François, P. Turpin	P0Q	A1	x	A	210	210	96	102	175	181	136	136	133	134	128	166	184	190	108	110	230	232	175	179	NA	NA	NA	NA	NA	NA	NA	NA
1752	RUN0936	La Réunion	Mascarenes	REU046	-21.3555167	55.6676500	2012-01-20	T. François, P. Turpin	P0Q	A1	x	A	214	226	96	100	177	181	149	149	128	134	152	154	184	232	106	110	218	232	169	177	110	111	237	239	94	102	131	175
1753	RUN0938	La Réunion	Mascarenes	REU046	-21.3555167	55.6676500	2012-01-20	T. François, P. Turpin	P0Q	A1	x	A	214	214	102	102	175	181	136	149	133	133	128	128	184	184	106	110	222	230	169	179	94	111	237	237	94	94	141	141
1754	RUN0939	La Réunion	Mascarenes	REU046	-21.3555167	55.6676500	2012-01-20	T. François, P. Turpin	P0Q	A1	x	A	214	218	102	102	181	181	136	147	132	134	126	128	184	184	106	110	230	236	169	177	107	111	233	235	94	102	139	141
1755	RUN0940	La Réunion	Mascarenes	REU046	-21.3555167	55.6676500	2012-01-20	T. François, P. Turpin	P0Q	A1	x	A	210	210	102	102	177	183	147	149	132	134	126	131	184	232	106	110	216	230	169	179	94	94	225	249	94	102	141	181
1756	RUN0941	La Réunion	Mascarenes	REU046	-21.3555167	55.6676500	2012-01-20	T. François, P. Turpin	P0Q	A1	x	A	210	214	96	102	177	177	147	149	134	134	126	164	184	232	106	110	218	230	165	181	94	111	233	237	94	94	135	177
1757	RUN0942	La Réunion	Mascarenes	REU046	-21.3555167	55.6676500	2012-01-20	T. François, P. Turpin	P0Q	A1	x	A	210	214	92	96	175	177	136	149	128	134	128	128	184	184	106	110	NA	NA	169	177	107	111	NA	NA	94	94	NA	NA
1758	RUN0943	La Réunion	Mascarenes	REU046	-21.3555167	55.6676500	2012-01-20	T. François, P. Turpin	P0Q	A1	x	A	210	218	96	102	177	179	136	149	128	133	128	154	184	232	106	110	232	236	169	169	NA	NA	NA	NA	NA	NA	NA	NA
1759	RUN0944	La Réunion	Mascarenes	REU046	-21.3555167	55.6676500	2012-01-20	T. François, P. Turpin	P0Q	A1	x	A	214	214	102	102	179	181	136	149	132	134	128	144	184	234	106	110	216	232	169	169	94	112	235	239	94	94	139	179
1760	RUN0945	La Réunion	Mascarenes	REU046	-21.3555167	55.6676500	2012-01-20	T. François, P. Turpin	P0Q	A1	x	A	210	214	96	102	175	175	136	149	134	134	126	142	184	184	110	110	218	222	169	169	92	94	239	239	100	104	141	141
1761	RUN0947	La Réunion	Mascarenes	REU046	-21.3555167	55.6676500	2012-01-20	T. François, P. Turpin	P0Q	A1	x	A	210	210	92	100	175	181	149	149	133	133	128	140	184	184	106	110	218	226	177	179	94	94	237	237	94	102	133	177
1762	RUN0948	La Réunion	Mascarenes	REU046	-21.3555167	55.6676500	2012-01-20	T. François, P. Turpin	P0Q	A1	x	A	210	210	102	102	177	181	149	149	134	134	128	128	184	232	106	110	220	230	169	169	107	110	235	243	94	102	133	141
1763	RUN0949	La Réunion	Mascarenes	REU046	-21.3555167	55.6676500	2012-01-20	T. François, P. Turpin	P0Q	A1	x	A	210	218	92	102	175	175	136	149	133	134	144	146	184	184	106	110	216	232	165	181	94	111	235	251	94	94	141	181
1764	RUN0950	La Réunion	Mascarenes	REU046	-21.3555167	55.6676500	2012-01-20	T. François, P. Turpin	P0Q	A1	x	A	218	218	100	102	177	181	149	149	133	134	128	148	184	202	106	110	230	232	165	169	111	111	233	233	94	102	139	175
1765	RUN0953	La Réunion	Mascarenes	REU046	-21.3555167	55.6676500	2012-01-20	T. François, P. Turpin	P0Q	A1	x	A	210	210	100	102	177	181	136	140	133	134	128	128	184	184	106	110	216	230	169	177	94	107	233	237	94	94	139	181
1766	RUN0954	La Réunion	Mascarenes	REU046	-21.3555167	55.6676500	2012-01-20	T. François, P. Turpin	P0Q	A1	x	A	210	214	100	102	175	181	147	149	133	134	131	162	174	184	110	110	216	232	169	181	94	110	235	235	94	102	141	177
1767	RUN0955	La Réunion	Mascarenes	REU046	-21.3555167	55.6676500	2012-01-20	T. François, P. Turpin	P0Q	A1	x	A	210	214	96	100	181	183	140	147	132	134	132	156	184	202	110	110	218	232	165	179	94	110	233	239	94	94	139	141
1768	RUN0957	La Réunion	Mascarenes	REU046	-21.3555167	55.6676500	2012-01-20	T. François, P. Turpin	P0Q	A1	x	A	210	210	96	102	181	181	147	149	134	134	128	131	184	206	106	106	218	220	169	181	94	111	233	239	94	104	177	181
1769	RUN0958	La Réunion	Mascarenes	REU046	-21.3555167	55.6676500	2012-01-20	T. François, P. Turpin	P0Q	A1	x	A	210	214	100	102	181	181	136	147	133	134	128	142	184	184	106	106	222	230	169	181	94	107	235	239	102	102	129	141
1770	RUN0959	La Réunion	Mascarenes	REU046	-21.3555167	55.6676500	2012-01-20	T. François, P. Turpin	P0Q	A1	x	A	210	214	96	96	177	181	149	149	134	134	126	128	184	184	106	110	222	230	169	177	94	107	233	237	94	94	129	181
1771	RUN0960	La Réunion	Mascarenes	REU046	-21.3555167	55.6676500	2012-01-20	T. François, P. Turpin	P0Q	A1	x	A	210	214	100	102	181	187	147	149	132	134	128	128	206	234	106	110	216	224	169	175	111	111	237	249	94	104	139	179
1772	RUN0937	La Réunion	Mascarenes	REU046	-21.3555167	55.6676500	2012-01-20	T. François, P. Turpin	Q	C1-C2	C2_b	C	214	222	102	102	177	181	142	147	133	134	128	128	184	200	106	110	220	222	169	179	107	111	239	255	94	94	133	181
1773	RUN0946	La Réunion	Mascarenes	REU046	-21.3555167	55.6676500	2012-01-20	T. François, P. Turpin	Q	C1-C2	C2_c	C	210	226	100	102	181	181	136	149	133	134	128	128	184	184	110	112	226	230	169	169	94	110	233	237	94	94	133	139
1774	RUN0951	La Réunion	Mascarenes	REU046	-21.3555167	55.6676500	2012-01-20	T. François, P. Turpin	Q	C1-C2	C2_b	C	218	218	96	100	177	181	136	147	133	134	158	158	184	184	106	110	216	230	165	169	111	116	233	237	94	102	139	183
1775	RUN0956	La Réunion	Mascarenes	REU046	-21.3555167	55.6676500	2012-01-20	T. François, P. Turpin	Q	C1-C2	C2_b	C	210	214	96	102	179	181	140	147	133	134	146	148	184	184	110	110	226	232	169	179	94	107	233	239	94	102	139	141
1776	RUN0952	La Réunion	Mascarenes	REU046	-21.3555167	55.6676500	2012-01-20	T. François, P. Turpin	PQQ	M4	M4_a	M	214	226	96	100	177	177	136	149	134	134	148	164	220	234	106	106	222	230	165	169	111	111	239	249	94	102	141	185
1777	RUN0961	La Réunion	Mascarenes	REU047	-21.358933	55.662917	2012-01-20	T. François	P0Q	A1	x	A	214	214	96	102	175	181	140	149	134	134	128	140	184	212	106	110	224	226	169	169	110	111	233	239	94	102	177	177
1778	RUN0962	La Réunion	Mascarenes	REU047	-21.358933	55.662917	2012-01-20	T. François	P0Q	A1	x	A	212	214	100	102	181	181	136	149	132	133	140	146	184	184	110	110	222	230	169	169	94	111	239	243	94	102	141	141
1779	RUN0963	La Réunion	Mascarenes	REU047	-21.358933	55.662917	2012-01-20	T. François	P0Q	A1	x	A	210	214	100	102	177	181	136	147	132	133	128	156	184	184	106	110	220	232	169	169	107	111	233	239	94	102	141	183
1780	RUN0964	La Réunion	Mascarenes	REU047	-21.358933	55.662917	2012-01-20	T. François	P0Q	A1	x	A	210	210	100	102	177	181	136	149	128	134	128	128	184	202	106	106	216	216	169	169	110	110	225	233	100	102	129	181
1781	RUN0965	La Réunion	Mascarenes	REU047	-21.358933	55.662917	2012-01-20	T. François	P0Q	A1	A1_MAD3	A	210	212	102	102	177	181	136	149	132	134	142	164	184	184	106	106	226	232	169	181	94	111	233	235	94	94	175	181
1782	RUN0966	La Réunion	Mascarenes	REU047	-21.358933	55.662917	2012-01-20	T. François	P0Q	A1	x	A	210	214	100	102	181	181	136	149	132	134	128	152	184	206	106	110	216	220	179	179	107	116	239	243	94	94	139	175
1783	RUN0967	La Réunion	Mascarenes	REU047	-21.358933	55.662917	2012-01-20	T. François	P0Q	A1	x	A	210	210	96	100	181	181	136	136	132	133	128	128	184	184	106	110	216	216	169	177	94	113	241	245	94	102	135	179
1784	RUN0969	La Réunion	Mascarenes	REU047	-21.358933	55.662917	2012-01-20	T. François	P0Q	A1	x	A	212	212	92	100	177	183	140	149	134	134	146	154	184	184	106	106	216	220	169	169	94	107	235	241	94	102	129	141
1785	RUN0968	La Réunion	Mascarenes	REU047	-21.358933	55.662917	2012-01-20	T. François	Not succesful	Not succesful	x	NA	212	226	96	102	175	177	140	149	132	133	128	146	184	184	106	110	216	220	165	181	94	111	239	239	94	94	139	181
1786	RUN1685	La Réunion	Mascarenes	REU048	-21.378626	55.667444	2012-04-25	Beekeeper	P0Q	A1	x	A	212	226	96	102	175	181	149	149	134	134	158	158	184	184	106	110	218	232	177	181	107	111	239	241	94	102	133	139
1787	RUN1686	La Réunion	Mascarenes	REU048	-21.378626	55.667444	2012-04-25	Beekeeper	P0Q	A1	x	A	210	210	100	102	181	181	149	149	132	134	142	154	184	198	106	110	216	232	169	169	111	111	233	235	94	102	139	157
1788	RUN1687	La Réunion	Mascarenes	REU048	-21.378626	55.667444	2012-04-25	Beekeeper	P0Q	A1	x	A	212	214	102	102	181	181	136	149	132	134	128	156	184	202	106	110	230	230	169	169	94	107	233	233	102	102	129	133
1789	RUN1688_2	La Réunion	Mascarenes	REU048	-21.378626	55.667444	2012-04-25	Beekeeper	P0Q	A1	x	A	210	220	100	102	177	181	147	149	133	134	128	154	184	184	110	110	216	218	165	169	107	111	225	231	94	102	177	181
1790	RUN1689	La Réunion	Mascarenes	REU048	-21.378626	55.667444	2012-04-25	Beekeeper	P0Q	A1	x	A	214	226	102	102	177	181	149	149	132	133	128	128	184	220	106	106	216	230	169	177	107	111	NA	NA	102	102	133	149
1791	RUN1690_2	La Réunion	Mascarenes	REU048	-21.378626	55.667444	2012-04-25	Beekeeper	P0Q	A1	x	A	210	226	96	96	181	183	149	149	133	134	146	154	174	184	106	110	216	218	169	177	94	107	225	233	94	94	177	183
1792	RUN0132	La Réunion	Mascarenes	REU049	-21.354449	55.646656	2011-11-03	Beekeeper	P0Q	A1	x	A	210	214	92	102	175	177	136	136	132	134	142	145	202	220	106	112	232	232	169	169	111	111	235	243	94	102	133	141
1793	RUN0133	La Réunion	Mascarenes	REU049	-21.354449	55.646656	2011-11-03	Beekeeper	P0Q	A1	x	A	210	214	102	102	179	181	149	149	132	134	128	128	184	206	106	106	230	230	169	181	94	111	233	243	94	102	141	141
1794	RUN0134	La Réunion	Mascarenes	REU049	-21.354449	55.646656	2011-11-03	Beekeeper	P0Q	A1	x	A	214	214	96	102	179	181	136	149	128	132	128	144	184	184	110	110	228	230	177	181	92	111	243	247	102	102	177	179
1795	RUN0135	La Réunion	Mascarenes	REU049	-21.354449	55.646656	2011-11-03	Beekeeper	P0Q	A1	x	A	214	214	102	102	177	181	149	149	134	134	128	128	184	232	110	110	220	234	165	179	111	111	233	237	94	102	135	141
1796	RUN0136	La Réunion	Mascarenes	REU049	-21.354449	55.646656	2011-11-03	Beekeeper	P0Q	A1	x	A	210	214	96	102	175	181	136	147	133	134	131	162	184	184	106	110	218	222	169	169	94	111	235	239	102	104	147	181
1797	RUN0137	La Réunion	Mascarenes	REU049	-21.354449	55.646656	2011-11-03	Beekeeper	P0Q	A1	x	A	214	214	102	102	179	181	149	149	134	134	128	128	184	184	106	110	222	230	169	169	94	111	233	243	94	102	141	167
1798	RUN0138	La Réunion	Mascarenes	REU049	-21.354449	55.646656	2011-11-03	Beekeeper	P0Q	A1	x	A	210	210	96	100	177	181	136	140	133	134	128	148	232	246	106	106	222	228	178	179	92	94	237	243	94	102	127	139
1799	RUN0139	La Réunion	Mascarenes	REU049	-21.354449	55.646656	2011-11-03	Beekeeper	P0Q	A1	x	A	210	214	102	102	177	181	137	149	132	132	132	146	212	226	110	110	214	216	169	177	107	111	233	233	94	102	139	139
1800	RUN0140	La Réunion	Mascarenes	REU049	-21.354449	55.646656	2011-11-03	Beekeeper	P0Q	A1	x	A	214	214	102	102	177	183	136	149	132	134	128	154	184	184	106	106	218	230	181	183	107	111	235	235	94	102	129	141
1801	RUN0141	La Réunion	Mascarenes	REU049	-21.354449	55.646656	2011-11-03	Beekeeper	P0Q	A1	A1_MAD3	A	210	226	96	102	177	181	147	149	134	134	140	166	184	220	106	110	216	222	169	169	111	111	233	237	94	102	179	181
1802	RUN0142	La Réunion	Mascarenes	REU049	-21.354449	55.646656	2011-11-03	Beekeeper	P0Q	A1	x	A	210	210	96	102	175	177	136	149	133	134	128	142	184	184	106	110	230	232	177	181	111	116	233	237	94	94	139	177
1803	RUN0143	La Réunion	Mascarenes	REU049	-21.354449	55.646656	2011-11-03	Beekeeper	P0Q	A1	x	A	210	214	96	100	181	181	136	147	132	134	128	128	184	232	106	110	216	232	169	169	94	107	233	233	94	94	129	131
1804	RUN0144	La Réunion	Mascarenes	REU049	-21.354449	55.646656	2011-11-03	Beekeeper	P0Q	A1	A1_MAD3	A	210	210	96	102	181	183	147	147	132	134	152	152	184	184	110	110	230	232	169	169	94	94	225	233	94	94	129	175
1805	RUN0145	La Réunion	Mascarenes	REU049	-21.354449	55.646656	2011-11-03	Beekeeper	P0Q	A1	x	A	214	214	100	102	177	181	136	149	133	133	128	128	184	184	106	106	232	232	169	179	107	116	233	235	94	102	139	143
1806	RUN0146	La Réunion	Mascarenes	REU049	-21.354449	55.646656	2011-11-03	Beekeeper	P0Q	A1	x	A	210	214	96	102	175	177	149	149	133	134	128	133	184	232	110	110	230	232	165	169	107	111	237	241	102	102	129	141
1807	RUN0147	La Réunion	Mascarenes	REU049	-21.354449	55.646656	2011-11-03	Beekeeper	P0Q	A1	x	A	NA	NA	NA	NA	NA	NA	136	136	134	134	128	140	184	184	106	110	216	218	169	181	94	107	233	239	100	104	141	147
1808	RUN0148	La Réunion	Mascarenes	REU049	-21.354449	55.646656	2011-11-03	Beekeeper	P0Q	A1	x	A	NA	NA	NA	NA	NA	NA	147	149	133	134	128	146	184	220	106	110	230	230	169	181	94	107	225	249	94	94	139	183
1809	RUN0149	La Réunion	Mascarenes	REU049	-21.354449	55.646656	2011-11-03	Beekeeper	P0Q	A1	x	A	NA	NA	92	100	NA	NA	149	149	133	134	128	132	220	220	106	110	230	230	169	177	111	111	233	243	94	102	139	181
1810	RUN0150	La Réunion	Mascarenes	REU049	-21.354449	55.646656	2011-11-03	Beekeeper	P0Q	A1	x	A	214	218	100	102	179	181	136	149	133	134	144	154	184	184	106	110	218	230	177	181	92	111	235	247	94	102	129	139
1811	RUN0151	La Réunion	Mascarenes	REU049	-21.354449	55.646656	2011-11-03	Beekeeper	P0Q	A1	x	A	214	218	100	100	177	179	136	147	128	134	128	128	184	184	106	110	216	216	169	169	107	111	239	249	94	102	139	141
1812	RUN1913	La Réunion	Mascarenes	REU050	-21.347214	55.633814	2012-07-06	O. Esnault	P0Q	A1	x	A	210	214	92	100	177	181	149	149	133	133	128	128	184	184	106	110	216	220	179	183	92	111	233	237	94	94	139	183
1813	RUN1914	La Réunion	Mascarenes	REU051	-21.34267	55.63562	2012-07-06	O. Esnault	P0QQ	A4	A4_a	A	210	210	102	102	177	181	149	149	134	134	128	128	184	184	106	110	220	226	179	179	94	111	239	243	94	94	129	129
1814	RUN1915	La Réunion	Mascarenes	REU051	-21.34267	55.63562	2012-07-06	O. Esnault	P0Q	A1	x	A	210	214	100	102	177	179	147	149	132	134	128	148	184	230	106	106	230	230	169	169	111	111	225	225	94	102	129	181
1815	RUN1916	La Réunion	Mascarenes	REU051	-21.34267	55.63562	2012-07-06	O. Esnault	P0Q	A1	A1_MAD3	A	210	214	96	102	179	181	136	147	132	134	128	162	184	184	106	110	222	230	169	177	107	111	239	259	94	102	177	183
1816	RUN0913	La Réunion	Mascarenes	REU052	-21.316	55.651483	2012-01-20	T. François, P. Turpin	P0Q	A1	x	A	210	226	92	102	175	181	147	149	134	134	128	128	184	232	106	106	220	230	169	179	107	111	233	239	94	104	133	177
1817	RUN0914	La Réunion	Mascarenes	REU052	-21.316	55.651483	2012-01-20	T. François, P. Turpin	P0Q	A1	x	A	210	210	102	102	179	181	136	136	133	134	128	144	184	184	106	110	230	232	169	179	94	116	233	241	102	102	139	147
1818	RUN0915	La Réunion	Mascarenes	REU052	-21.316	55.651483	2012-01-20	T. François, P. Turpin	P0Q	A1	x	A	210	210	102	102	175	181	136	149	128	134	128	142	184	184	106	106	222	234	181	183	111	111	233	237	94	102	143	181
1819	RUN0916	La Réunion	Mascarenes	REU052	-21.316	55.651483	2012-01-20	T. François, P. Turpin	P0Q	A1	x	A	210	226	102	102	175	181	136	136	132	134	128	146	184	190	110	110	230	232	169	169	111	111	237	247	102	102	129	177
1820	RUN0917	La Réunion	Mascarenes	REU052	-21.316	55.651483	2012-01-20	T. François, P. Turpin	P0Q	A1	x	A	210	214	96	102	177	181	136	147	133	138	146	166	184	184	110	110	218	230	165	169	94	107	231	235	94	102	139	177
1821	RUN0918	La Réunion	Mascarenes	REU052	-21.316	55.651483	2012-01-20	T. François, P. Turpin	P0Q	A1	x	A	210	214	102	102	181	181	140	147	132	134	142	152	184	184	110	110	218	220	177	183	94	111	NA	NA	94	102	141	141
1822	RUN0919	La Réunion	Mascarenes	REU052	-21.316	55.651483	2012-01-20	T. François, P. Turpin	P0Q	A1	x	A	214	214	96	102	175	179	136	149	133	133	128	128	184	220	106	110	216	218	165	169	94	94	NA	NA	102	102	133	139
1823	RUN0920	La Réunion	Mascarenes	REU052	-21.316	55.651483	2012-01-20	T. François, P. Turpin	P0Q	A1	x	A	212	214	102	102	181	181	149	149	132	134	128	128	184	232	106	106	218	230	169	179	94	111	233	233	94	94	NA	NA
1824	RUN0921	La Réunion	Mascarenes	REU052	-21.316	55.651483	2012-01-20	T. François, P. Turpin	P0Q	A1	x	A	210	214	100	100	177	181	136	149	133	134	156	166	184	232	106	110	214	216	169	169	92	111	239	239	94	102	139	143
1825	RUN0922	La Réunion	Mascarenes	REU052	-21.316	55.651483	2012-01-20	T. François, P. Turpin	P0Q	A1	x	A	210	214	96	102	177	181	136	149	132	133	128	128	184	184	110	110	216	230	165	169	94	111	225	233	94	102	139	179
1826	RUN0924	La Réunion	Mascarenes	REU052	-21.316	55.651483	2012-01-20	T. François, P. Turpin	P0Q	A1	x	A	210	210	92	100	179	179	149	152	133	134	150	166	184	184	110	110	218	230	169	169	94	94	233	239	94	102	141	177
1827	RUN0925	La Réunion	Mascarenes	REU052	-21.316	55.651483	2012-01-20	T. François, P. Turpin	P0Q	A1	x	A	214	226	102	102	181	181	147	149	133	134	128	162	184	184	106	106	216	218	169	177	94	107	225	241	100	104	139	179
1828	RUN0926	La Réunion	Mascarenes	REU052	-21.316	55.651483	2012-01-20	T. François, P. Turpin	P0Q	A1	x	A	210	214	96	96	NA	NA	149	149	133	133	154	166	184	184	110	110	218	230	169	181	107	111	237	239	102	104	141	143
1829	RUN0927	La Réunion	Mascarenes	REU052	-21.316	55.651483	2012-01-20	T. François, P. Turpin	P0Q	A1	x	A	210	214	100	102	177	181	149	149	132	134	128	146	184	220	106	106	218	230	177	183	NA	NA	NA	NA	NA	NA	NA	NA
1830	RUN0928	La Réunion	Mascarenes	REU052	-21.316	55.651483	2012-01-20	T. François, P. Turpin	P0Q	A1	x	A	210	210	92	96	179	181	149	152	133	134	142	150	184	184	106	106	222	222	169	177	94	111	233	237	94	104	181	181
1831	RUN0930	La Réunion	Mascarenes	REU052	-21.316	55.651483	2012-01-20	T. François, P. Turpin	P0Q	A1	x	A	218	218	96	102	177	179	149	149	133	134	144	166	184	184	110	110	220	230	165	169	94	107	237	239	94	102	141	177
1832	RUN0923	La Réunion	Mascarenes	REU052	-21.316	55.651483	2012-01-20	T. François, P. Turpin	Q	C1-C2	C2_a	C	210	210	96	100	177	181	149	149	133	134	126	128	184	234	106	110	218	230	173	181	94	111	233	239	94	102	141	141
1833	RUN0929	La Réunion	Mascarenes	REU052	-21.316	55.651483	2012-01-20	T. François, P. Turpin	PQQ	M4	M4_a	M	214	226	102	102	181	181	149	149	132	134	128	148	184	184	106	110	216	226	169	177	92	111	235	237	102	102	179	179
1834	RUN1217	La Réunion	Mascarenes	REU053	-21.285833	55.627683	2012-01-31	T. François, M. Techer	P0Q	A1	x	A	210	214	100	102	181	181	149	149	133	134	128	146	184	184	106	110	230	232	169	169	NA	NA	NA	NA	NA	NA	NA	NA
1835	RUN1218	La Réunion	Mascarenes	REU053	-21.285833	55.627683	2012-01-31	T. François, M. Techer	P0Q	A1	x	A	210	218	96	102	181	181	149	149	133	134	128	156	184	232	106	106	216	232	177	179	94	111	231	239	94	94	181	181
1836	RUN1219	La Réunion	Mascarenes	REU053	-21.285833	55.627683	2012-01-31	T. François, M. Techer	P0Q	A1	x	A	218	226	96	100	177	181	136	140	134	134	154	154	184	184	106	108	218	222	179	179	111	111	237	239	94	102	175	177
1837	RUN1221	La Réunion	Mascarenes	REU053	-21.285833	55.627683	2012-01-31	T. François, M. Techer	P0Q	A1	x	A	210	210	100	102	175	177	140	147	134	134	152	162	184	230	106	110	220	230	165	169	NA	NA	NA	NA	94	102	129	181
1838	RUN1223	La Réunion	Mascarenes	REU053	-21.285833	55.627683	2012-01-31	T. François, M. Techer	P0Q	A1	x	A	210	210	96	100	181	181	136	147	134	134	128	128	184	232	106	108	220	230	169	169	107	107	235	249	94	94	177	177
1839	RUN1224	La Réunion	Mascarenes	REU053	-21.285833	55.627683	2012-01-31	T. François, M. Techer	P0Q	A1	x	A	212	218	96	102	181	181	136	149	128	133	128	128	184	184	106	110	220	222	169	181	94	111	233	233	100	100	127	179
1840	RUN1225	La Réunion	Mascarenes	REU053	-21.285833	55.627683	2012-01-31	T. François, M. Techer	P0Q	A1	x	A	210	218	102	102	177	183	149	149	128	134	128	128	184	184	106	110	216	232	169	169	111	112	229	237	100	100	133	181
1841	RUN1226	La Réunion	Mascarenes	REU053	-21.285833	55.627683	2012-01-31	T. François, M. Techer	P0Q	A1	x	A	210	210	96	100	175	181	136	147	134	134	128	160	190	232	106	110	220	230	165	169	107	111	233	235	94	102	141	141
1842	RUN1228	La Réunion	Mascarenes	REU053	-21.285833	55.627683	2012-01-31	T. François, M. Techer	P0Q	A1	x	A	214	226	102	102	181	181	136	149	133	134	128	160	184	184	110	110	220	220	169	169	NA	NA	NA	NA	94	102	139	177
1843	RUN1229	La Réunion	Mascarenes	REU053	-21.285833	55.627683	2012-01-31	T. François, M. Techer	P0Q	A1	A1_MAD3	A	210	210	102	102	181	181	136	137	133	134	128	154	184	184	106	106	222	232	NA	NA	94	94	NA	NA	94	94	NA	NA
1844	RUN1230	La Réunion	Mascarenes	REU053	-21.285833	55.627683	2012-01-31	T. François, M. Techer	P0Q	A1	x	A	210	214	100	102	181	181	140	149	134	134	128	146	184	184	110	110	230	230	165	169	107	111	233	239	102	102	181	181
1845	RUN1231	La Réunion	Mascarenes	REU053	-21.285833	55.627683	2012-01-31	T. François, M. Techer	P0Q	A1	x	A	214	218	96	100	177	181	147	149	134	134	126	128	184	184	110	110	224	230	169	175	94	111	225	233	94	102	129	143
1846	RUN1233	La Réunion	Mascarenes	REU053	-21.285833	55.627683	2012-01-31	T. François, M. Techer	P0Q	A1	x	A	212	214	102	102	177	179	136	149	134	134	128	144	184	232	106	110	226	230	169	169	94	107	233	237	94	104	179	181
1847	RUN1234	La Réunion	Mascarenes	REU053	-21.285833	55.627683	2012-01-31	T. François, M. Techer	P0Q	A1	x	A	210	210	100	102	177	181	136	137	134	134	128	140	184	184	110	110	222	228	165	169	92	111	239	245	94	102	141	197
1848	RUN1235	La Réunion	Mascarenes	REU053	-21.285833	55.627683	2012-01-31	T. François, M. Techer	P0Q	A1	x	A	214	214	96	102	175	179	136	152	128	133	128	148	184	184	106	106	230	230	169	181	94	110	233	237	94	102	129	133
1849	RUN1236	La Réunion	Mascarenes	REU053	-21.285833	55.627683	2012-01-31	T. François, M. Techer	P0Q	A1	x	A	210	226	96	100	181	181	136	152	128	134	126	128	184	184	110	110	222	224	165	169	111	116	225	241	94	102	129	141
1850	RUN1237	La Réunion	Mascarenes	REU053	-21.285833	55.627683	2012-01-31	T. François, M. Techer	P0Q	A1	x	A	210	210	96	102	181	181	147	149	132	133	128	148	184	232	106	110	230	232	165	177	107	111	237	239	94	94	141	141
1851	RUN1238	La Réunion	Mascarenes	REU053	-21.285833	55.627683	2012-01-31	T. François, M. Techer	P0Q	A1	x	A	210	214	92	102	175	175	149	149	133	134	128	154	184	232	110	110	216	230	165	169	92	111	237	239	102	104	131	139
1852	RUN1239	La Réunion	Mascarenes	REU053	-21.285833	55.627683	2012-01-31	T. François, M. Techer	P0Q	A1	x	A	210	214	100	102	175	179	149	149	134	134	148	160	184	202	106	106	230	234	165	169	92	116	233	239	100	100	133	141
1853	RUN1240	La Réunion	Mascarenes	REU053	-21.285833	55.627683	2012-01-31	T. François, M. Techer	P0Q	A1	A1_MAD3	A	210	210	102	102	181	181	147	149	132	133	142	156	184	232	106	106	216	232	169	177	94	111	235	239	94	102	177	181
1854	RUN1241	La Réunion	Mascarenes	REU053	-21.285833	55.627683	2012-01-31	T. François, M. Techer	P0Q	A1	x	A	210	218	100	102	175	181	136	149	132	133	128	128	184	184	106	106	230	232	169	169	94	112	235	249	94	102	129	129
1855	RUN1242	La Réunion	Mascarenes	REU053	-21.285833	55.627683	2012-01-31	T. François, M. Techer	P0Q	A1	x	A	210	210	102	102	181	181	149	149	132	134	142	156	184	184	106	110	216	218	169	169	107	111	233	237	94	102	139	141
1856	RUN1243	La Réunion	Mascarenes	REU053	-21.285833	55.627683	2012-01-31	T. François, M. Techer	P0Q	A1	x	A	214	226	96	96	177	177	140	147	133	134	128	128	184	208	106	106	NA	NA	169	169	95	112	233	235	94	94	139	141
1857	RUN1244	La Réunion	Mascarenes	REU053	-21.285833	55.627683	2012-01-31	T. François, M. Techer	P0Q	A1	x	A	210	214	96	100	181	181	149	149	132	132	128	128	184	220	106	110	230	240	169	179	108	112	237	239	94	102	141	177
1858	RUN1245	La Réunion	Mascarenes	REU053	-21.285833	55.627683	2012-01-31	T. François, M. Techer	P0Q	A1	x	A	214	218	92	102	181	181	136	147	134	134	128	132	184	184	106	106	230	230	169	169	92	111	233	233	94	94	139	141
1859	RUN1247	La Réunion	Mascarenes	REU053	-21.285833	55.627683	2012-01-31	T. François, M. Techer	P0Q	A1	x	A	212	214	96	102	181	181	149	149	132	134	128	128	184	232	106	110	220	230	169	181	94	111	225	235	94	96	129	141
1860	RUN1248	La Réunion	Mascarenes	REU053	-21.285833	55.627683	2012-01-31	T. François, M. Techer	P0Q	A1	x	A	214	218	102	102	181	203	147	149	132	134	128	156	184	232	110	110	226	234	181	181	94	111	235	249	94	102	131	177
1861	RUN1249	La Réunion	Mascarenes	REU053	-21.285833	55.627683	2012-01-31	T. François, M. Techer	P0Q	A1	x	A	214	214	102	102	177	181	136	149	133	134	148	162	184	184	106	110	230	230	169	179	94	111	233	237	94	102	141	177
1862	RUN1250	La Réunion	Mascarenes	REU053	-21.285833	55.627683	2012-01-31	T. François, M. Techer	P0Q	A1	x	A	214	218	96	96	179	191	149	149	132	133	128	142	184	184	106	106	218	222	169	169	92	111	237	243	94	94	129	183
1863	RUN1251	La Réunion	Mascarenes	REU053	-21.285833	55.627683	2012-01-31	T. François, M. Techer	P0Q	A1	x	A	212	218	92	96	175	181	136	147	134	134	128	148	184	232	106	106	230	232	165	169	NA	NA	NA	NA	NA	NA	NA	NA
1864	RUN1252	La Réunion	Mascarenes	REU053	-21.285833	55.627683	2012-01-31	T. François, M. Techer	P0Q	A1	x	A	210	226	100	100	181	181	136	149	134	134	NA	NA	184	184	106	110	232	232	165	169	111	111	237	239	94	102	139	179
1865	RUN1253	La Réunion	Mascarenes	REU053	-21.285833	55.627683	2012-01-31	T. François, M. Techer	P0Q	A1	x	A	210	210	96	102	179	181	149	149	132	134	128	128	184	200	106	106	218	232	NA	NA	NA	NA	NA	NA	NA	NA	NA	NA
1866	RUN1254	La Réunion	Mascarenes	REU053	-21.285833	55.627683	2012-01-31	T. François, M. Techer	P0Q	A1	x	A	210	214	96	102	175	175	136	149	133	133	148	156	184	184	110	110	222	230	NA	NA	94	94	NA	NA	NA	NA	NA	NA
1867	RUN1255	La Réunion	Mascarenes	REU053	-21.285833	55.627683	2012-01-31	T. François, M. Techer	P0Q	A1	x	A	210	214	100	102	177	181	149	149	133	133	156	160	184	184	106	110	216	226	169	175	94	94	237	245	94	102	141	141
1868	RUN1256_2	La Réunion	Mascarenes	REU053	-21.285833	55.627683	2012-01-31	T. François, M. Techer	P0Q	A1	x	A	210	214	96	100	181	181	136	149	128	134	128	128	184	184	106	110	222	230	165	165	107	111	237	249	94	102	129	141
1869	RUN1257	La Réunion	Mascarenes	REU053	-21.285833	55.627683	2012-01-31	T. François, M. Techer	P0Q	A1	x	A	210	216	100	102	179	181	147	147	132	133	146	152	184	184	106	110	220	232	169	177	94	111	NA	NA	94	94	NA	NA
1870	RUN1258	La Réunion	Mascarenes	REU053	-21.285833	55.627683	2012-01-31	T. François, M. Techer	P0Q	A1	x	A	210	210	96	102	177	181	140	147	132	133	128	128	184	184	106	106	216	222	169	169	111	117	235	235	100	100	175	181
1871	RUN1259	La Réunion	Mascarenes	REU053	-21.285833	55.627683	2012-01-31	T. François, M. Techer	P0Q	A1	x	A	214	222	102	102	175	181	149	149	128	134	128	162	184	234	106	106	230	230	169	169	NA	NA	NA	NA	94	94	133	133
1872	RUN1260	La Réunion	Mascarenes	REU053	-21.285833	55.627683	2012-01-31	T. François, M. Techer	P0Q	A1	x	A	210	218	96	102	179	179	136	147	132	134	128	128	184	232	106	110	216	230	169	179	111	111	NA	NA	94	104	141	141
1873	RUN1261_2	La Réunion	Mascarenes	REU053	-21.285833	55.627683	2012-01-31	T. François, M. Techer	P0Q	A1	x	A	210	214	96	100	175	179	136	136	133	133	128	128	184	234	106	106	222	236	169	181	111	111	241	263	94	94	141	177
1874	RUN1262_2	La Réunion	Mascarenes	REU053	-21.285833	55.627683	2012-01-31	T. François, M. Techer	P0Q	A1	x	A	210	214	96	102	177	177	136	149	133	134	126	144	184	184	110	110	218	222	165	177	107	111	225	239	94	102	139	141
1875	RUN1263	La Réunion	Mascarenes	REU053	-21.285833	55.627683	2012-01-31	T. François, M. Techer	P0Q	A1	A1_MAD3	A	210	212	102	102	177	181	149	149	128	133	NA	NA	184	184	NA	NA	230	232	169	169	94	112	NA	NA	100	102	NA	NA
1876	RUN1264_2	La Réunion	Mascarenes	REU053	-21.285833	55.627683	2012-01-31	T. François, M. Techer	P0Q	A1	x	A	214	218	100	102	175	181	147	149	133	133	128	128	184	184	110	110	230	232	169	179	111	111	233	249	94	102	135	139
1877	RUN1265	La Réunion	Mascarenes	REU053	-21.285833	55.627683	2012-01-31	T. François, M. Techer	P0Q	A1	x	A	212	214	102	102	177	181	136	149	133	134	128	128	184	184	110	110	222	230	169	175	94	111	239	239	94	102	139	139
1878	RUN1266	La Réunion	Mascarenes	REU053	-21.285833	55.627683	2012-01-31	T. François, M. Techer	P0Q	A1	x	A	210	210	96	100	177	183	149	149	133	134	126	128	184	184	106	110	230	230	NA	NA	107	111	NA	NA	NA	NA	NA	NA
1879	RUN1267	La Réunion	Mascarenes	REU053	-21.285833	55.627683	2012-01-31	T. François, M. Techer	P0Q	A1	x	A	210	212	102	102	175	177	140	149	133	134	162	164	184	184	106	110	220	230	165	169	94	107	235	243	94	102	179	181
1880	RUN1269	La Réunion	Mascarenes	REU053	-21.285833	55.627683	2012-01-31	T. François, M. Techer	P0Q	A1	x	A	210	210	102	102	175	179	136	149	132	133	128	128	184	184	108	110	216	232	169	175	NA	NA	NA	NA	NA	NA	NA	NA
1881	RUN1270	La Réunion	Mascarenes	REU053	-21.285833	55.627683	2012-01-31	T. François, M. Techer	P0Q	A1	x	A	210	214	102	102	177	179	149	149	133	134	144	162	184	184	106	106	220	224	165	177	94	107	NA	NA	102	104	129	133
1882	RUN1271_2	La Réunion	Mascarenes	REU053	-21.285833	55.627683	2012-01-31	T. François, M. Techer	P0Q	A1	x	A	214	218	100	102	179	181	149	149	133	134	140	151	184	184	110	110	220	232	169	169	110	111	239	243	94	102	177	181
1883	RUN1272_2	La Réunion	Mascarenes	REU053	-21.285833	55.627683	2012-01-31	T. François, M. Techer	P0Q	A1	x	A	210	218	100	102	177	181	136	136	134	134	128	154	184	232	110	110	230	230	175	177	107	113	233	233	94	94	129	139
1884	RUN1273_2	La Réunion	Mascarenes	REU053	-21.285833	55.627683	2012-01-31	T. François, M. Techer	P0Q	A1	A1_MAD3	A	210	214	92	96	177	181	149	149	133	133	128	128	184	184	110	110	216	232	169	179	111	111	233	243	94	94	181	181
1885	RUN1274_2	La Réunion	Mascarenes	REU053	-21.285833	55.627683	2012-01-31	T. François, M. Techer	P0Q	A1	A1_MAD3	A	210	214	96	100	177	181	136	147	133	133	128	128	184	184	106	110	216	232	165	181	107	111	235	237	94	102	141	163
1886	RUN1275_2	La Réunion	Mascarenes	REU053	-21.285833	55.627683	2012-01-31	T. François, M. Techer	P0Q	A1	x	A	212	218	102	102	179	181	136	149	134	134	146	154	184	184	106	110	218	222	165	175	107	111	243	243	102	102	139	141
1887	RUN1276_2	La Réunion	Mascarenes	REU053	-21.285833	55.627683	2012-01-31	T. François, M. Techer	P0Q	A1	x	A	210	210	100	102	177	181	136	136	128	134	128	148	184	184	106	110	216	216	175	181	107	107	233	243	94	102	135	141
1888	RUN1277	La Réunion	Mascarenes	REU053	-21.285833	55.627683	2012-01-31	T. François, M. Techer	P0Q	A1	x	A	210	218	102	102	181	181	149	149	133	134	128	128	184	184	106	110	214	214	NA	NA	NA	NA	NA	NA	NA	NA	NA	NA
1889	RUN1278_2	La Réunion	Mascarenes	REU053	-21.285833	55.627683	2012-01-31	T. François, M. Techer	P0Q	A1	x	A	214	214	100	102	177	181	136	149	133	134	128	128	212	232	106	110	230	232	169	169	107	111	235	243	102	102	139	177
1890	RUN1279_2	La Réunion	Mascarenes	REU053	-21.285833	55.627683	2012-01-31	T. François, M. Techer	P0Q	A1	x	A	210	210	96	102	177	177	149	149	133	134	128	148	220	232	106	106	216	230	165	169	111	111	237	237	94	94	129	141
1891	RUN1280	La Réunion	Mascarenes	REU053	-21.285833	55.627683	2012-01-31	T. François, M. Techer	P0Q	A1	x	A	210	228	102	102	177	181	149	149	134	134	128	128	184	232	110	110	216	216	175	179	107	111	233	243	94	100	NA	NA
1892	RUN1281	La Réunion	Mascarenes	REU053	-21.285833	55.627683	2012-01-31	T. François, M. Techer	P0Q	A1	x	A	214	218	96	100	177	181	147	147	128	134	128	128	184	184	106	110	216	222	165	169	92	107	233	237	100	100	135	181
1893	RUN1282	La Réunion	Mascarenes	REU053	-21.285833	55.627683	2012-01-31	T. François, M. Techer	P0Q	A1	x	A	212	214	96	100	175	181	136	147	132	134	126	132	184	184	106	110	216	230	NA	NA	NA	NA	NA	NA	NA	NA	NA	NA
1894	RUN1283	La Réunion	Mascarenes	REU053	-21.285833	55.627683	2012-01-31	T. François, M. Techer	P0Q	A1	x	A	210	214	100	102	175	181	147	149	132	134	128	128	184	232	106	110	216	232	169	169	111	111	NA	NA	94	102	NA	NA
1895	RUN1285	La Réunion	Mascarenes	REU053	-21.285833	55.627683	2012-01-31	T. François, M. Techer	P0Q	A1	x	A	210	210	100	102	179	181	149	149	133	134	128	128	184	184	106	106	230	232	NA	NA	NA	NA	NA	NA	NA	NA	NA	NA
1896	RUN1287_2	La Réunion	Mascarenes	REU053	-21.285833	55.627683	2012-01-31	T. François, M. Techer	P0Q	A1	x	A	210	210	92	96	181	181	136	136	133	134	128	160	184	232	110	110	216	222	169	169	111	111	237	239	94	102	141	147
1897	RUN1288	La Réunion	Mascarenes	REU053	-21.285833	55.627683	2012-01-31	T. François, M. Techer	P0Q	A1	x	A	212	214	96	102	175	181	147	149	133	133	128	162	184	184	106	106	220	220	165	175	107	111	231	237	100	100	139	185
1898	RUN1289	La Réunion	Mascarenes	REU053	-21.285833	55.627683	2012-01-31	T. François, M. Techer	P0Q	A1	x	A	210	220	96	96	181	181	136	149	132	134	142	146	184	184	106	110	222	222	NA	NA	NA	NA	NA	NA	NA	NA	NA	NA
1899	RUN1290	La Réunion	Mascarenes	REU053	-21.285833	55.627683	2012-01-31	T. François, M. Techer	P0Q	A1	x	A	210	220	102	102	175	177	147	149	134	134	142	148	184	184	106	110	216	232	NA	NA	NA	NA	NA	NA	NA	NA	NA	NA
1900	RUN1291	La Réunion	Mascarenes	REU053	-21.285833	55.627683	2012-01-31	T. François, M. Techer	P0Q	A1	x	A	216	228	102	102	179	181	136	147	132	134	162	164	184	184	106	110	226	232	NA	NA	NA	NA	NA	NA	NA	NA	NA	NA
1901	RUN1293	La Réunion	Mascarenes	REU053	-21.285833	55.627683	2012-01-31	T. François, M. Techer	P0Q	A1	x	A	210	210	100	102	177	181	149	149	132	134	128	148	184	232	106	110	230	230	169	169	107	111	NA	NA	94	94	141	141
1902	RUN1294	La Réunion	Mascarenes	REU053	-21.285833	55.627683	2012-01-31	T. François, M. Techer	P0Q	A1	x	A	210	214	100	102	181	181	149	149	132	134	142	148	184	184	110	110	230	232	NA	NA	NA	NA	NA	NA	NA	NA	NA	NA
1903	RUN1295	La Réunion	Mascarenes	REU053	-21.285833	55.627683	2012-01-31	T. François, M. Techer	P0Q	A1	x	A	212	214	92	102	181	181	140	149	132	133	128	145	184	184	106	110	220	236	NA	NA	111	111	NA	NA	102	102	NA	NA
1904	RUN1296	La Réunion	Mascarenes	REU053	-21.285833	55.627683	2012-01-31	T. François, M. Techer	P0Q	A1	x	A	214	218	96	102	177	181	136	147	133	133	128	128	184	184	106	110	216	216	169	181	107	111	233	239	94	94	129	181
1905	RUN1220	La Réunion	Mascarenes	REU053	-21.285833	55.627683	2012-01-31	T. François, M. Techer	Q	C1-C2	C2_c	C	210	218	102	102	177	181	136	149	132	134	128	146	184	206	106	110	222	230	177	181	111	111	237	247	94	94	139	177
1906	RUN1222	La Réunion	Mascarenes	REU053	-21.285833	55.627683	2012-01-31	T. François, M. Techer	Q	C1-C2	C2_c	C	210	226	96	102	177	181	147	147	134	134	128	128	184	184	106	110	232	232	165	169	94	111	239	259	94	102	129	177
1907	RUN1227	La Réunion	Mascarenes	REU053	-21.285833	55.627683	2012-01-31	T. François, M. Techer	Q	C1-C2	C2_c	C	210	214	100	102	181	183	147	147	134	134	128	128	184	184	110	110	228	230	177	179	111	111	225	237	94	94	131	181
1908	RUN1232	La Réunion	Mascarenes	REU053	-21.285833	55.627683	2012-01-31	T. François, M. Techer	Q	C1-C2	C2_c	C	210	214	92	100	175	175	136	140	133	134	144	144	184	184	106	110	216	232	169	175	107	111	235	239	102	104	129	129
1909	RUN1246	La Réunion	Mascarenes	REU053	-21.285833	55.627683	2012-01-31	T. François, M. Techer	Q	C1-C2	C2_c	C	214	218	100	102	177	177	147	149	134	134	128	144	232	232	106	110	230	232	165	169	107	111	239	239	94	104	139	177
1910	RUN1268	La Réunion	Mascarenes	REU053	-21.285833	55.627683	2012-01-31	T. François, M. Techer	Q	C1-C2	C2_c	C	210	218	100	102	175	181	149	149	133	134	146	156	184	202	106	110	216	216	169	181	NA	NA	NA	NA	NA	NA	NA	NA
1911	RUN1286	La Réunion	Mascarenes	REU053	-21.285833	55.627683	2012-01-31	T. François, M. Techer	Q	C1-C2	C2_d	C	210	214	96	102	175	177	149	149	133	134	128	128	234	234	106	106	216	230	169	175	94	111	235	239	94	94	177	177
1912	RUN1292	La Réunion	Mascarenes	REU053	-21.285833	55.627683	2012-01-31	T. François, M. Techer	Q	C1-C2	C2_c	C	210	210	102	102	179	191	NA	NA	133	134	128	128	184	184	106	110	220	230	NA	NA	94	111	225	233	NA	NA	NA	NA
1913	RUN1284	La Réunion	Mascarenes	REU053	-21.285833	55.627683	2012-01-31	T. François, M. Techer	Not succesful	Not succesful	x	NA	NA	NA	NA	NA	NA	NA	149	149	134	134	128	130	184	232	106	110	216	226	169	181	111	111	225	237	100	102	133	141
1914	RUN2071	La Réunion	Mascarenes	REU054	-21.296066	55.589961	2012-10-17	O. Esnault	P0Q	A1	x	A	210	218	102	102	179	181	147	149	133	134	128	142	184	184	106	110	216	218	177	181	94	111	225	233	94	94	141	141
1915	RUN2072	La Réunion	Mascarenes	REU054	-21.296066	55.589961	2012-10-17	O. Esnault	P0Q	A1	x	A	214	218	100	102	175	181	147	147	133	134	128	128	184	184	106	106	218	230	165	169	111	111	233	239	94	102	141	179
1916	RUN0152	La Réunion	Mascarenes	REU055	-21.313221	55.621400	2011-11-03	Beekeeper	P0Q	A1	x	A	220	228	100	102	177	177	136	149	132	134	142	162	184	184	106	110	232	236	165	175	92	111	237	237	102	102	141	177
1917	RUN0153	La Réunion	Mascarenes	REU055	-21.313221	55.621400	2011-11-03	Beekeeper	P0Q	A1	x	A	210	220	96	96	175	181	147	149	132	134	148	156	184	232	106	106	230	230	169	179	94	94	233	235	94	94	139	139
1918	RUN0154	La Réunion	Mascarenes	REU055	-21.313221	55.621400	2011-11-03	Beekeeper	P0Q	A1	x	A	210	226	96	102	177	181	136	140	132	133	NA	NA	184	184	106	110	216	222	169	175	107	111	225	233	102	102	141	141
1919	RUN0155	La Réunion	Mascarenes	REU055	-21.313221	55.621400	2011-11-03	Beekeeper	P0Q	A1	x	A	218	222	102	102	177	181	147	149	133	134	128	146	184	184	106	106	216	220	177	179	107	111	237	243	94	102	129	181
1920	RUN0156	La Réunion	Mascarenes	REU055	-21.313221	55.621400	2011-11-03	Beekeeper	P0Q	A1	x	A	210	214	102	102	179	181	145	147	132	134	128	154	184	184	106	110	222	222	169	177	107	112	233	243	94	102	133	179
1921	RUN0157	La Réunion	Mascarenes	REU055	-21.313221	55.621400	2011-11-03	Beekeeper	P0Q	A1	x	A	212	218	100	102	177	181	136	149	134	134	128	146	184	206	106	110	216	216	177	181	111	111	235	243	94	102	139	179
1922	RUN0158	La Réunion	Mascarenes	REU055	-21.313221	55.621400	2011-11-03	Beekeeper	P0Q	A1	x	A	210	212	96	102	181	191	149	149	133	134	128	144	184	184	106	106	218	224	165	169	94	107	245	249	94	94	177	183
1923	RUN0159	La Réunion	Mascarenes	REU055	-21.313221	55.621400	2011-11-03	Beekeeper	P0Q	A1	x	A	210	214	96	102	175	181	147	149	134	134	132	148	184	184	106	110	220	222	169	169	94	111	235	249	102	104	135	179
1924	RUN0160	La Réunion	Mascarenes	REU055	-21.313221	55.621400	2011-11-03	Beekeeper	P0Q	A1	x	A	218	226	102	102	181	181	149	149	132	134	128	128	184	184	110	110	216	216	169	169	94	111	231	237	94	102	141	179
1925	RUN0161	La Réunion	Mascarenes	REU055	-21.313221	55.621400	2011-11-03	Beekeeper	P0Q	A1	x	A	210	214	96	96	177	179	149	149	128	134	128	146	184	184	106	110	230	230	169	169	110	111	233	241	102	104	131	133
1926	RUN0162	La Réunion	Mascarenes	REU055	-21.313221	55.621400	2011-11-03	Beekeeper	P0Q	A1	x	A	214	214	92	102	177	181	136	149	132	133	128	148	184	184	106	110	216	230	179	181	94	111	237	249	94	94	141	181
1927	RUN0163	La Réunion	Mascarenes	REU055	-21.313221	55.621400	2011-11-03	Beekeeper	P0Q	A1	x	A	210	218	100	102	181	183	147	149	133	134	146	162	184	184	106	110	230	230	165	169	94	107	225	249	94	104	139	183
1928	RUN0164	La Réunion	Mascarenes	REU055	-21.313221	55.621400	2011-11-03	Beekeeper	P0Q	A1	x	A	210	214	92	100	181	209	136	149	133	134	128	128	184	234	106	110	220	230	165	169	94	113	233	237	102	102	175	181
1929	RUN0165	La Réunion	Mascarenes	REU055	-21.313221	55.621400	2011-11-03	Beekeeper	P0Q	A1	x	A	210	210	100	102	177	181	140	149	133	134	128	128	184	232	106	106	230	232	169	169	107	110	233	239	102	102	129	181
1930	RUN0166	La Réunion	Mascarenes	REU055	-21.313221	55.621400	2011-11-03	Beekeeper	P0Q	A1	x	A	214	214	92	96	175	179	147	149	134	134	142	142	184	238	110	110	222	230	169	169	107	111	239	249	94	102	131	141
1931	RUN0167	La Réunion	Mascarenes	REU055	-21.313221	55.621400	2011-11-03	Beekeeper	P0Q	A1	x	A	214	214	100	100	177	181	137	149	132	134	128	146	184	234	106	106	230	232	175	181	113	113	233	233	94	100	179	181
1932	RUN0168	La Réunion	Mascarenes	REU055	-21.313221	55.621400	2011-11-03	Beekeeper	P0Q	A1	x	A	210	210	96	102	175	177	136	149	134	134	128	148	220	232	106	110	218	220	169	169	94	94	225	231	94	100	181	181
1933	RUN0169	La Réunion	Mascarenes	REU055	-21.313221	55.621400	2011-11-03	Beekeeper	P0Q	A1	x	A	218	226	102	102	177	181	149	149	128	133	146	148	184	184	110	110	216	220	165	177	111	111	233	255	102	104	139	181
1934	RUN0170	La Réunion	Mascarenes	REU055	-21.313221	55.621400	2011-11-03	Beekeeper	P0Q	A1	x	A	210	214	100	102	179	181	147	152	132	134	128	128	NA	NA	NA	NA	216	224	169	181	94	107	239	243	94	94	129	129
1935	RUN0171_2	La Réunion	Mascarenes	REU055	-21.313221	55.621400	2011-11-03	Beekeeper	P0Q	A1	x	A	210	210	102	102	175	177	136	149	132	134	128	158	184	232	106	110	230	232	169	169	116	116	225	235	94	94	177	181
1936	RUN0312	La Réunion	Mascarenes	REU056	-21.331905	55.600614	2011-12-14	T. François	P0Q	A1	x	A	214	214	102	102	177	179	140	151	133	134	128	150	184	184	106	106	216	230	179	181	NA	NA	NA	NA	NA	NA	NA	NA
1937	RUN0313	La Réunion	Mascarenes	REU056	-21.331905	55.600614	2011-12-14	T. François	P0Q	A1	x	A	210	214	100	102	181	183	147	149	128	128	126	128	184	184	110	110	222	230	169	169	107	112	225	235	94	94	139	139
1938	RUN0314	La Réunion	Mascarenes	REU056	-21.331905	55.600614	2011-12-14	T. François	P0Q	A1	A1_MAD3	A	214	220	102	102	181	181	149	149	133	134	160	164	184	202	110	112	222	230	169	169	94	113	233	239	94	104	NA	NA
1939	RUN0315	La Réunion	Mascarenes	REU056	-21.331905	55.600614	2011-12-14	T. François	P0Q	A1	x	A	214	218	102	102	177	181	149	149	128	134	148	162	184	184	106	110	232	232	169	175	94	111	NA	NA	102	102	NA	NA
1940	RUN0316	La Réunion	Mascarenes	REU056	-21.331905	55.600614	2011-12-14	T. François	P0Q	A1	x	A	218	220	100	102	179	181	137	149	128	134	128	150	184	234	106	106	220	232	177	181	99	111	239	243	94	102	139	177
1941	RUN0317	La Réunion	Mascarenes	REU056	-21.331905	55.600614	2011-12-14	T. François	P0Q	A1	x	A	214	218	100	100	175	177	147	149	134	134	128	162	184	184	106	110	218	230	165	169	NA	NA	NA	NA	NA	NA	NA	NA
1942	RUN0318	La Réunion	Mascarenes	REU056	-21.331905	55.600614	2011-12-14	T. François	P0Q	A1	x	A	214	214	100	102	175	177	140	149	133	134	128	144	184	184	110	110	218	232	165	169	111	111	239	239	102	102	NA	NA
1943	RUN0319	La Réunion	Mascarenes	REU056	-21.331905	55.600614	2011-12-14	T. François	P0Q	A1	x	A	210	210	102	102	181	181	147	149	134	134	128	140	184	230	106	110	216	230	175	179	92	111	233	235	102	102	141	143
1944	RUN0320	La Réunion	Mascarenes	REU056	-21.331905	55.600614	2011-12-14	T. François	P0Q	A1	x	A	214	214	100	102	177	181	136	149	134	134	128	133	184	184	106	106	230	230	169	169	94	94	233	239	94	102	139	179
1945	RUN0321	La Réunion	Mascarenes	REU056	-21.331905	55.600614	2011-12-14	T. François	P0Q	A1	x	A	218	218	102	102	181	183	149	149	128	134	128	142	232	232	106	110	218	230	169	169	111	111	249	249	94	94	133	177
1946	RUN0322	La Réunion	Mascarenes	REU056	-21.331905	55.600614	2011-12-14	T. François	P0Q	A1	x	A	210	210	92	100	181	181	136	140	132	133	142	156	184	228	106	110	230	232	169	177	111	111	225	233	94	104	177	181
1947	RUN0323	La Réunion	Mascarenes	REU056	-21.331905	55.600614	2011-12-14	T. François	P0Q	A1	x	A	210	214	96	102	177	177	136	147	133	133	128	146	184	184	106	110	216	230	169	175	99	107	233	241	94	104	141	167
1948	RUN0324	La Réunion	Mascarenes	REU056	-21.331905	55.600614	2011-12-14	T. François	P0Q	A1	x	A	210	222	100	100	177	179	136	147	133	134	128	154	210	232	106	106	218	220	177	179	94	107	233	243	94	94	179	185
1949	RUN0325	La Réunion	Mascarenes	REU056	-21.331905	55.600614	2011-12-14	T. François	P0Q	A1	x	A	210	210	102	102	175	177	140	152	134	134	128	130	184	184	106	110	230	230	165	175	99	113	235	237	94	102	141	197
1950	RUN0327	La Réunion	Mascarenes	REU056	-21.331905	55.600614	2011-12-14	T. François	P0Q	A1	x	A	212	212	96	100	177	181	147	149	133	134	148	154	184	232	110	110	222	230	165	179	111	111	233	233	94	94	139	181
1951	RUN0328	La Réunion	Mascarenes	REU056	-21.331905	55.600614	2011-12-14	T. François	P0Q	A1	x	A	210	210	92	102	177	181	140	149	134	134	128	154	184	202	106	110	218	230	165	169	111	111	225	239	94	94	133	181
1952	RUN0329	La Réunion	Mascarenes	REU056	-21.331905	55.600614	2011-12-14	T. François	P0Q	A1	x	A	214	218	96	96	175	181	149	149	133	133	128	128	184	184	106	106	218	230	179	179	92	111	239	239	94	102	141	177
1953	RUN0330	La Réunion	Mascarenes	REU056	-21.331905	55.600614	2011-12-14	T. François	P0Q	A1	x	A	210	218	102	102	181	181	136	147	133	134	128	128	184	184	106	110	218	222	179	181	92	111	225	233	94	100	163	183
1954	RUN0331	La Réunion	Mascarenes	REU056	-21.331905	55.600614	2011-12-14	T. François	P0Q	A1	x	A	214	220	96	100	175	181	136	149	128	134	128	128	184	184	110	110	218	230	169	177	110	111	239	241	94	102	139	141
1955	RUN0332	La Réunion	Mascarenes	REU056	-21.331905	55.600614	2011-12-14	T. François	P0Q	A1	x	A	210	210	102	102	175	181	136	149	133	134	128	156	184	184	106	110	216	230	169	169	94	111	235	237	94	104	139	141
1956	RUN0333	La Réunion	Mascarenes	REU056	-21.331905	55.600614	2011-12-14	T. François	P0Q	A1	x	A	210	234	102	102	181	187	136	147	128	134	140	144	184	184	106	110	212	230	169	169	94	111	237	239	94	102	133	191
1957	RUN0334	La Réunion	Mascarenes	REU056	-21.331905	55.600614	2011-12-14	T. François	P0Q	A1	x	A	210	214	100	102	177	181	149	149	128	134	128	148	184	206	106	106	216	220	169	169	94	111	233	241	94	94	163	181
1958	RUN0335	La Réunion	Mascarenes	REU056	-21.331905	55.600614	2011-12-14	T. François	P0Q	A1	x	A	212	226	100	102	175	177	140	147	132	134	128	156	184	234	106	110	232	232	177	181	94	107	237	239	94	102	177	181
1959	RUN0336	La Réunion	Mascarenes	REU056	-21.331905	55.600614	2011-12-14	T. François	P0Q	A1	x	A	210	214	96	102	177	177	149	149	134	134	144	146	184	184	106	110	216	222	169	169	94	94	235	243	94	94	141	189
1960	RUN0337	La Réunion	Mascarenes	REU056	-21.331905	55.600614	2011-12-14	T. François	P0Q	A1	x	A	222	228	100	102	177	179	149	151	128	134	128	128	184	184	106	110	218	230	165	169	107	107	225	233	94	94	129	129
1961	RUN0338	La Réunion	Mascarenes	REU056	-21.331905	55.600614	2011-12-14	T. François	P0Q	A1	x	A	210	210	100	102	181	181	149	149	133	134	146	146	184	210	106	110	230	234	169	181	111	111	233	239	94	102	139	181
1962	RUN0339	La Réunion	Mascarenes	REU056	-21.331905	55.600614	2011-12-14	T. François	P0QQ	A4	A4_a	A	210	214	102	102	179	181	149	149	132	133	128	142	184	220	106	110	216	230	169	169	107	111	225	243	94	102	141	177
1963	RUN0340	La Réunion	Mascarenes	REU056	-21.331905	55.600614	2011-12-14	T. François	P0Q	A1	x	A	214	218	96	102	181	181	149	149	132	134	128	128	184	184	110	110	218	230	169	169	111	111	233	243	94	100	177	179
1964	RUN0341	La Réunion	Mascarenes	REU056	-21.331905	55.600614	2011-12-14	T. François	P0Q	A1	x	A	202	210	100	102	181	181	147	149	134	134	128	128	184	234	110	110	216	218	177	177	94	111	243	243	94	112	177	177
1965	RUN0342	La Réunion	Mascarenes	REU056	-21.331905	55.600614	2011-12-14	T. François	P0Q	A1	x	A	202	210	100	102	177	181	147	147	128	134	142	146	184	184	106	110	216	220	169	179	92	111	233	235	94	102	161	183
1966	RUN0343	La Réunion	Mascarenes	REU056	-21.331905	55.600614	2011-12-14	T. François	P0Q	A1	x	A	210	210	100	102	181	181	147	149	133	134	128	144	184	184	106	110	216	218	165	177	111	111	237	243	94	94	141	177
1967	RUN0344	La Réunion	Mascarenes	REU056	-21.331905	55.600614	2011-12-14	T. François	P0Q	A1	x	A	214	214	102	102	181	181	149	149	132	133	128	146	184	184	106	106	216	220	169	181	94	110	235	241	102	102	141	179
1968	RUN0345	La Réunion	Mascarenes	REU056	-21.331905	55.600614	2011-12-14	T. François	P0Q	A1	x	A	210	212	92	102	177	179	149	152	134	134	128	128	184	184	106	110	230	230	179	181	94	113	235	239	94	94	141	169
1969	RUN0346_2	La Réunion	Mascarenes	REU056	-21.331905	55.600614	2011-12-14	T. François	P0Q	A1	x	A	210	218	100	102	175	179	140	147	133	134	128	128	184	202	110	110	226	230	165	169	92	94	233	235	94	102	129	181
1970	RUN0347	La Réunion	Mascarenes	REU056	-21.331905	55.600614	2011-12-14	T. François	P0Q	A1	x	A	210	214	96	102	181	181	140	149	134	134	128	148	184	200	106	110	220	232	169	178	111	111	235	237	94	102	139	141
1971	RUN0348	La Réunion	Mascarenes	REU056	-21.331905	55.600614	2011-12-14	T. François	P0Q	A1	A1_MAD3	A	210	210	96	102	177	181	147	149	134	134	128	142	184	184	106	110	218	226	169	175	111	111	233	239	94	94	141	175
1972	RUN0349	La Réunion	Mascarenes	REU056	-21.331905	55.600614	2011-12-14	T. François	P0Q	A1	x	A	210	214	96	100	181	181	149	149	128	132	128	128	184	184	106	110	216	216	169	179	111	111	235	235	94	94	139	139
1973	RUN0350	La Réunion	Mascarenes	REU056	-21.331905	55.600614	2011-12-14	T. François	P0Q	A1	x	A	210	210	100	102	181	181	149	149	128	133	128	154	184	234	106	110	216	222	169	177	110	111	225	233	94	104	141	141
1974	RUN0351	La Réunion	Mascarenes	REU056	-21.331905	55.600614	2011-12-14	T. François	P0Q	A1	A1_MAD3	A	210	210	102	102	177	179	136	147	134	134	132	142	184	184	106	110	230	232	177	181	92	111	233	239	102	102	129	141
1975	RUN0352	La Réunion	Mascarenes	REU056	-21.331905	55.600614	2011-12-14	T. François	P0QQ	A4	A4_a	A	210	214	96	100	177	181	149	152	134	134	128	148	184	234	110	110	226	230	175	179	94	111	233	235	100	102	177	181
1976	RUN0326	La Réunion	Mascarenes	REU056	-21.331905	55.600614	2011-12-14	T. François	Q	C1-C2	C2_a	C	210	210	96	102	177	181	136	147	134	134	128	142	184	228	106	110	216	218	169	181	94	107	233	251	94	94	139	181
1977	RUN0373	La Réunion	Mascarenes	REU057	-21.347596	55.603312	2011-12-13	Beekeeper	P0Q	A1	x	A	210	212	102	102	177	181	149	149	133	134	154	164	184	184	106	110	230	230	165	179	94	94	233	247	102	102	141	185
1978	RUN0374	La Réunion	Mascarenes	REU057	-21.347596	55.603312	2011-12-13	Beekeeper	P0Q	A1	x	A	210	210	100	102	181	181	140	147	128	133	128	162	184	218	106	110	230	232	169	179	107	111	233	237	94	102	129	177
1979	RUN1669_2	La Réunion	Mascarenes	REU057	-21.347596	55.603312	2012-04-25	Beekeeper	P0Q	A1	x	A	210	214	102	102	175	181	136	140	132	133	128	150	184	184	106	110	216	230	169	169	107	111	237	243	102	102	133	141
1980	RUN1670	La Réunion	Mascarenes	REU057	-21.347596	55.603312	2012-04-25	Beekeeper	P0Q	A1	x	A	210	214	102	102	175	181	147	149	132	134	128	162	184	184	110	110	216	220	165	169	92	94	NA	NA	94	102	NA	NA
1981	RUN1671	La Réunion	Mascarenes	REU057	-21.347596	55.603312	2012-04-25	Beekeeper	P0Q	A1	x	A	210	210	96	100	177	181	149	149	134	134	128	148	184	234	110	110	218	222	169	169	99	111	233	235	102	102	141	177
1982	RUN1672	La Réunion	Mascarenes	REU057	-21.347596	55.603312	2012-04-25	Beekeeper	P0Q	A1	x	A	210	214	92	102	177	179	147	149	132	134	128	128	184	184	106	110	220	230	169	169	94	111	235	241	94	102	133	181
1983	RUN1673	La Réunion	Mascarenes	REU057	-21.347596	55.603312	2012-04-25	Beekeeper	P0Q	A1	x	A	218	220	102	102	177	183	149	149	133	134	128	162	184	184	106	110	216	230	165	181	107	111	235	253	102	104	141	179
1984	RUN1674	La Réunion	Mascarenes	REU057	-21.347596	55.603312	2012-04-25	Beekeeper	P0Q	A1	A1_MAD3	A	210	212	100	102	177	181	136	140	134	134	128	154	184	184	110	110	216	216	169	181	107	111	233	237	94	102	141	161
1985	RUN1675	La Réunion	Mascarenes	REU057	-21.347596	55.603312	2012-04-25	Beekeeper	P0Q	A1	x	A	210	210	96	102	177	177	149	149	134	134	128	128	184	184	110	110	216	218	165	169	94	111	233	237	94	94	139	139
1986	RUN2037	La Réunion	Mascarenes	REU058	-21.360931	55.620732	2012-08-19	O. Esnault	P0Q	A1	x	A	210	210	100	102	175	177	147	149	134	134	128	128	202	232	106	106	222	232	169	183	107	111	225	225	94	94	177	179
[truncated: 2,402 more rows]
